# Supplementary material for: Enantioselective Peroxidation of C-alkynyl imines enabled by chiral BINOL calcium phosphate
Source: Royal Society of Chemistry journal article supplement (doi:10.1039/d1cc07156d), 2022-01-01
Supplement: d1cc07156d1.pdf [file d1cc07156d1.pdf]

## Supporting information

### Enantioselective Peroxidation of C-Alkynyl Imines Enabled by Chiral BINOL Calcium Phosphate

Zhongwen Sun,<sup>\*a,b</sup> Lijun Chen,<sup>a</sup> Kaixiong Qiu,<sup>a</sup> Bo Liu,<sup>a</sup> Hongtao Li<sup>a</sup> and Fang Yu<sup>a</sup>

*a School of Pharmaceutical Science & Yunnan Key Laboratory of Pharmacology for Natural Products, Kunming Medical University, Kunming, 650500, China. E-mail: sunzhongwen@kmmu.edu.cn*

*b Key Laboratory of State Forestry and Grassland Administration on Highly-Efficient Utilization of Forestry Biomass Resources in Southwest China, Southwest Forestry University, Kunming, 650224, China.*

#### Contents:

|                                                                                                   |     |
|---------------------------------------------------------------------------------------------------|-----|
| 1. General information.....                                                                       | S2  |
| 2. General procedure for synthesis of C-alkynyl-N-Boc-N,O-acetals <b>1</b> .....                  | S2  |
| 3. General procedure for synthesis of hydroperoxides <b>2</b> .....                               | S2  |
| 4. Catalytic asymmetric synthesis of chiral C-alkynyl $\alpha$ -amino peroxides <b>3, 4</b> ..... | S3  |
| 5. Characterization data of the products <b>3, 4</b> .....                                        | S4  |
| 6. Catalytic asymmetric synthesis of chiral C-aryl $\alpha$ -amino peroxides <b>6</b> .....       | S25 |
| 7. Characterization data of the products <b>6</b> .....                                           | S26 |
| 8. Large-Scale catalytic asymmetric reactions.....                                                | S27 |
| 9. General procedure for synthesis and characterization data of the products <b>7</b> .....       | S27 |
| 10. The experiments of non-linear effect and product ee dependence on time.....                   | S29 |
| 11. Proposed transition states for the asymmetric peroxidation of C-alkynyl imines.....           | S30 |
| 12. Determination of the Product Stereochemistry.....                                             | S30 |
| 13. References.....                                                                               | S32 |
| 14. Copies of NMR and HPLC.....                                                                   | S33 |

## General information

$^1\text{H-NMR}$ ,  $^{13}\text{C-NMR}$  and  $^{19}\text{F-NMR}$  spectra were recorded on Bruker Avance 400 MHz or spectrophotometer. Chemical shift ( $\delta$ ) are expressed in ppm, and  $J$  values are given in Hz. The enantiomeric excess was determined by HPLC using Chiralpak AD-H, Chiralpak IC-3, Chiralpak ID-3 columns with *n*-Hexane and 2-propanol as eluents. High-resolution mass spectrometry (HRMS) was recorded on a VG Auto Spec-3000 spectrometer. Optical rotations were measured on a JASCO DIP-370p polarimeter at 589 nm at 20 °C. Flash column chromatography was performed on silica gel (200-300 mesh, Qingdao Marine Chemical Inc.). Toluene, diethyl ether, and THF was distilled from sodium benzophenone ketyl immediately prior to use. MeCN,  $\text{CHCl}_3$ , and  $\text{CH}_2\text{Cl}_2$  were all distilled from  $\text{CaH}_2$  immediately prior to use. Unless otherwise noted, all chemicals and solvents were purchased from Adama-beta<sup>®</sup>, Energy Chemical *et al.* and used as received without further purification. Chiral phosphoric acids were purchased from Daicel Chiral Technologies Co., LTD. *C*-alkynyl-*N*-Boc-*N,O*-acetals **1**<sup>1</sup> were prepared according to the reported procedures. Hydroperoxides **2** were purchased directly or prepared according to the reported procedures<sup>2</sup>.

## General procedure for synthesis of *C*-alkynyl-*N*-Boc-*N,O*-acetals **1**

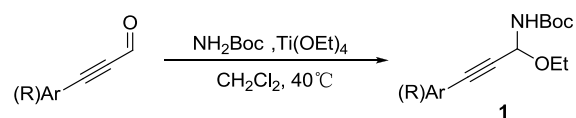

To a solution of ynal (10 mmol) in dichloromethane (80 ml) under an argon atmosphere was added  $\text{Ti}(\text{OEt})_4$  (4.26 g, 15 mmol) and  $\text{BocNH}_2$  (1.76 g, 15 mmol) at room temperature. The reaction mixture was stirred under an argon atmosphere at  $40^\circ\text{C}$  for 12 h. The reaction was quenched by the addition of saturated  $\text{Na}_2\text{SO}_4$  solution (20 mL). The resulting white precipitate was isolated, and the aqueous fraction was further extracted with  $\text{CH}_2\text{Cl}_2$  (20 mL x 3). The combined organic fraction was dried over  $\text{Na}_2\text{SO}_4$  and the solvent was evaporated to give a residue. The residue was purified by flash column chromatography using  $\text{AcOEt}$ /hexane as an eluent to afford *C*-alkynyl-*N*-Boc-*N,O*-acetal **1**.

## General procedure for synthesis of hydroperoxides **2**

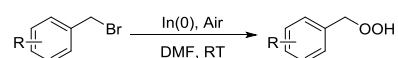

To a 5 ml vial equipped with a stirring bar, benzyl bromide (0.3 mmol) was dissolved in DMF (1 ml), indium powder (45 mg, 0.39 mmol) was added into the mixture. The resulted mixture was

then stirred at room temperature and monitored by TLC. After consumption of starting material, the reaction mixture was quenched with water, extracted with ethyl acetate, purified by flash chromatography (silica gel, *n*-hexanes/EtOAc) to provide the desired product.

**General procedure for synthesis of hydroperoxides 2p.**

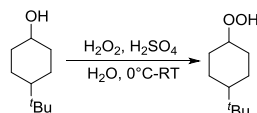

To a cooled (0 °C) solution of H<sub>2</sub>O<sub>2</sub> (65 ml, 1.1 mol, 50% wt in H<sub>2</sub>O) and H<sub>2</sub>SO<sub>4</sub> (1.0 mL, 19 mmol) was added 4-(tert-butyl)cyclohexan-1-ol (42 mmol). The reaction mixture was stirred vigorously at ambient temperature for 14 hours and then was partitioned between Et<sub>2</sub>O (100 mL) and water (100 mL). The aqueous layer was extracted with Et<sub>2</sub>O (2 × 50 mL) and the combined organic layers were washed with 1 N NaOH (3 × 25 mL) and brine (50 mL). The resulting solution was dried over MgSO<sub>4</sub> and concentrated *in vacuo* to yield hydroperoxide as a white solid.

**Catalytic asymmetric synthesis of chiral C-alkynyl α-amino peroxides 3 and 4**

**Table S1. Screening of optimal condition for the *oxa*-Mannich reaction**

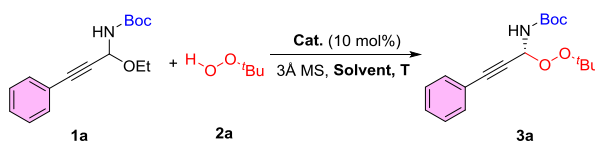

| entry | catalyst | solvent           | Yield (%) <sup>[b]</sup> | ee (%) <sup>[c]</sup> |
|-------|----------|-------------------|--------------------------|-----------------------|
| 1     | A1       | DCM               | 90                       | 2                     |
| 2     | A2       | DCM               | 93                       | 5                     |
| 3     | A3       | DCM               | 92                       | 4                     |
| 4     | A4       | DCM               | 91                       | 3                     |
| 5     | B1       | DCM               | 65                       | 21                    |
| 6     | B2       | DCM               | 77                       | 20                    |
| 7     | B3       | DCM               | 81                       | 41                    |
| 8     | B4       | DCM               | 91                       | 22                    |
| 9     | B5       | DCM               | 80                       | 14                    |
| 10    | B6       | DCM               | 75                       | 18                    |
| 11    | C1       | DCM               | 92                       | 77                    |
| 12    | C2       | DCM               | 90                       | 70                    |
| 13    | C3       | DCM               | 82                       | 69                    |
| 14    | C1       | CHCl <sub>3</sub> | 79                       | 81                    |
| 15    | C1       | DCE               | 94                       | 90                    |
| 16    | C1       | CCl <sub>4</sub>  | 86                       | 66                    |
| 17    | C1       | toluene           | 90                       | 72                    |
| 18    | C1       | <i>m</i> -xylene  | 81                       | 77                    |
| 19    | C1       | THF               | N.R.                     | N.D.                  |

|                   |    |       |    |    |
|-------------------|----|-------|----|----|
| 20                | C1 | MCPE  | 83 | 82 |
| 21                | C1 | ether | 46 | 80 |
| 22 <sup>[d]</sup> | C1 | DCE   | 75 | 55 |
| 23 <sup>[e]</sup> | C1 | DCE   | 60 | 90 |
| 24 <sup>[f]</sup> | C1 | DCE   | 94 | 92 |
| 25 <sup>[g]</sup> | C1 | DCE   | 88 | 90 |
| 26 <sup>[h]</sup> | C1 | DCE   | 90 | 89 |

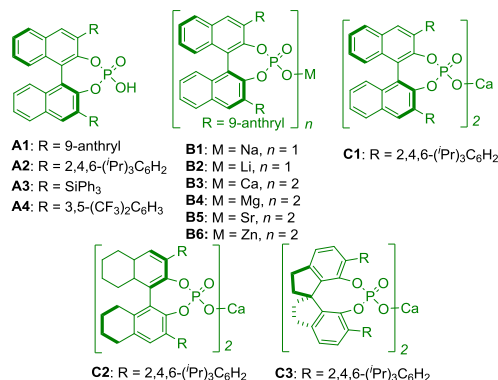

[a] General reaction condition: **1a** (0.1 mmol), **2a** (0.2 mmol), catalyst (10 mol%), solvent (1 mL), and 3 Å M.S. (100mg), rt, 12h. [b] Isolated yield. [c] Determined by HPLC analysis. [d] Na<sub>2</sub>SO<sub>4</sub> replaced 3 Å M. S.. [e] 4 Å M. S. replaced 3 Å M. S.. [f] Volume of solvent was 2 mL. [g] Reaction was carried out at 0 °C. [h] the catalyst loading was reduced to 5 mol%. Boc = *tert*-butoxycarbonyl, DCM = dichloromethane, DCE = 1,2-dichloroethane, M. S. = molecular sieves.

### General procedure for synthesis of chiral C-alkynyl α-amino peroxides **3**, **4**

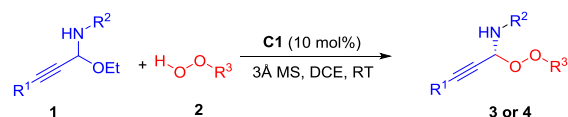

To a solution of **1** (0.1 mmol) and **2** (0.2 mmol) in DCE (1.0 mL) was added the catalyst **C1** (10 mol %) and 3 Å MS (100 mg) at room temperature. After *C*-alkynyl-*N*-Boc-*N,O*-acetal **1** was consumed, the mixture was directly purified by silica gel chromatography (ethyl acetate/petroleum ether = 1/40 to 1/20) to afford the product **3** or **4** (the racemic product **3** or **4** was obtained by using 1,1'-binaphthyl-2,2'-diyl hydrogenphosphate as the catalyst).

### Characterization data of the products **3**, **4**

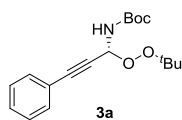

*tert*-butyl (*R*)-(1-(*tert*-butylperoxy)-3-phenylprop-2-yn-1-yl)carbamate **3a**

White Solid, 94% yield, 30.1 mg,  $[\alpha]_D^{20} = +62.3$  (c 1.00 CHCl<sub>3</sub>).

<sup>1</sup>H-NMR(400 MHz, CDCl<sub>3</sub>): δ (ppm): 7.46 (d, 2H, *J* = 6.4 Hz), 7.37-7.30 (m, 3H), 6.23 (d, 1H, *J* = 9.2 Hz), 5.59 (d, 1H, *J* = 7.2 Hz), 1.48 (s, 9H), 1.29 (s, 9H).

<sup>13</sup>C-NMR (100 MHz, CDCl<sub>3</sub>): δ (ppm): 153.91, 131.91, 128.94, 128.29, 121.73, 85.15, 83.20, 81.08, 80.61, 75.55, 28.25, 26.40.

HRMS calcd.for C<sub>18</sub>H<sub>25</sub>NO<sub>4</sub>Na [M+Na]<sup>+</sup>: 342.1676, found: 342.1672.

HPLC analysis: Daicel CHIRALCEL IC-3, *n*-hexane/*i*-PrOH = 90/10, flow rate = 1.0 mL/min, λ = 254 nm, retention time: t<sub>R</sub> = 5.7 min (minor), t<sub>R</sub> = 12.3 min (major).

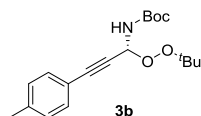

*tert*-butyl (*R*)-(1-(*tert*-butylperoxy)-3-(*p*-tolyl)prop-2-yn-1-yl)carbamate **3b**

White Solid, 84% yield, 28.3 mg, [α]<sub>D</sub><sup>20</sup> = +51.2 (c 1.25 CHCl<sub>3</sub>).

<sup>1</sup>H-NMR(400 MHz, CDCl<sub>3</sub>): δ (ppm): 7.35 (d, 2H, *J* = 8.0 Hz), 7.11 (d, 2H, *J* = 8.0 Hz), 6.22 (d, 1H, *J* = 8.8 Hz), 5.58 (d, 1H, *J* = 7.2 Hz), 2.35 (s, 3H), 1.48 (s, 9H), 1.29 (s, 9H).

<sup>13</sup>C-NMR (100 MHz, CDCl<sub>3</sub>): δ (ppm): 153.96, 139.15, 131.81, 129.05, 118.64, 85.41, 82.53, 81.03, 80.53, 75.58, 28.26, 26.40, 21.50.

HRMS calcd.for C<sub>19</sub>H<sub>27</sub>NO<sub>4</sub>Na [M+Na]<sup>+</sup>: 356.1832, found: 356.1827.

HPLC analysis: Daicel CHIRALCEL IC-3, *n*-hexane/*i*-PrOH = 90/10, flow rate = 1.0 mL/min, λ = 254 nm, retention time: t<sub>R</sub> = 7.7 min (minor), t<sub>R</sub> = 23.6 min (major).

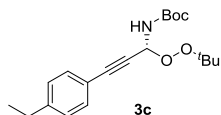

*tert*-butyl (*R*)-(1-(*tert*-butylperoxy)-3-(4-ethylphenyl)prop-2-yn-1-yl)carbamate **3c**

White Solid, 80% yield, 27.8 mg, [α]<sub>D</sub><sup>20</sup> = +80.2 (c 1.00 CHCl<sub>3</sub>).

<sup>1</sup>H-NMR(400 MHz, CDCl<sub>3</sub>): δ (ppm): 7.37 (d, 2H, *J* = 6.8 Hz), 7.14 (d, 2H, *J* = 8.0 Hz), 6.22 (d, 1H, *J* = 9.2 Hz), 5.59 (d, 1H, *J* = 7.2 Hz), 2.64 (dd, 2H, *J* = 7.6 Hz, *J* = 7.6 Hz), 1.48 (s, 9H), 1.29 (s, 9H), 1.22 (t, 3H, *J* = 7.6 Hz, *J* = 7.6 Hz).

<sup>13</sup>C-NMR (100 MHz, CDCl<sub>3</sub>): δ (ppm): 153.98, 145.43, 131.90, 127.86, 118.86, 85.43, 82.51, 81.03, 80.53, 75.59, 28.82, 28.26, 26.40, 15.42.

HRMS calcd.for C<sub>20</sub>H<sub>29</sub>NO<sub>4</sub>Na [M+Na]<sup>+</sup>: 370.1989, found: 370.1984.

HPLC analysis: Daicel CHIRALCEL IC-3, *n*-hexane/*i*-PrOH = 90/10, flow rate = 1.0 mL/min, λ = 254 nm, retention time: t<sub>R</sub> = 6.9 min (minor), t<sub>R</sub> = 20.7 min (major).

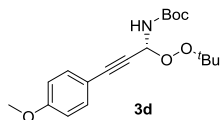

*tert*-butyl (*R*)-(1-(*tert*-butylperoxy)-3-(4-methoxyphenyl)prop-2-yn-1-yl)carbamate **3d**

White Solid, 90% yield, 31.5 mg,  $[\alpha]_{\text{D}}^{20} = +56.3$  (c 1.90 CHCl<sub>3</sub>).

**<sup>1</sup>H-NMR** (400 MHz, CDCl<sub>3</sub>):  $\delta$  (ppm): 7.39 (d, 2H,  $J = 8.8$  Hz), 6.84 (d, 2H,  $J = 8.8$  Hz), 6.22 (d, 1H,  $J = 9.2$  Hz), 5.59 (d, 1H,  $J = 8.0$  Hz), 3.91 (s, 3H), 1.48 (s, 9H), 1.29 (s, 9H).

**<sup>13</sup>C-NMR** (100 MHz, CDCl<sub>3</sub>):  $\delta$  (ppm): 160.09, 153.99, 133.42, 113.94, 113.73, 85.29, 81.84, 81.03, 80.49, 75.60, 55.28, 28.25, 26.40.

**HRMS** calcd. for C<sub>19</sub>H<sub>27</sub>NO<sub>5</sub>Na [M+Na]<sup>+</sup>: 372.1781, found: 372.1778.

**HPLC analysis:** Daicel CHIRALCEL IC-3, *n*-hexane/*i*-PrOH = 80/20, flow rate = 1.0 mL/min,  $\lambda = 254$  nm, retention time:  $t_{\text{R}} = 15.3$  min (minor),  $t_{\text{R}} = 21.7$  min (major).

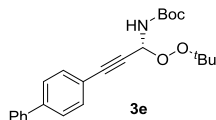

*tert*-butyl (*R*)-(3-([1,1'-biphenyl]-4-yl)-1-(*tert*-butylperoxy)prop-2-yn-1-yl)carbamate **3e**

White Solid, 97% yield, 38.3 mg,  $[\alpha]_{\text{D}}^{20} = +83.0$  (c 0.20 CHCl<sub>3</sub>).

**<sup>1</sup>H-NMR** (400 MHz, CDCl<sub>3</sub>):  $\delta$  (ppm): 7.59-7.51 (m, 6H), 7.44 (t, 2H,  $J = 7.2$  Hz,  $J = 7.6$  Hz), 7.36 (t, 1H,  $J = 7.6$  Hz,  $J = 7.2$  Hz), 6.26 (d, 1H,  $J = 9.6$  Hz), 5.64 (d, 1H,  $J = 9.2$  Hz), 1.49 (s, 9H), 1.31 (s, 9H).

**<sup>13</sup>C-NMR** (100 MHz, CDCl<sub>3</sub>):  $\delta$  (ppm): 154.00, 141.71, 140.17, 132.36, 128.89, 127.79, 127.05, 126.99, 120.56, 85.06, 83.83, 81.14, 80.63, 75.53, 28.27, 26.43.

**HRMS** calcd. for C<sub>24</sub>H<sub>29</sub>NO<sub>4</sub>Na [M+Na]<sup>+</sup>: 418.1989, found: 418.1983.

**HPLC analysis:** Daicel CHIRALCEL IC-3, *n*-hexane/*i*-PrOH = 80/20, flow rate = 1.0 mL/min,  $\lambda = 254$  nm, retention time:  $t_{\text{R}} = 15.3$  min (minor),  $t_{\text{R}} = 21.7$  min (major).

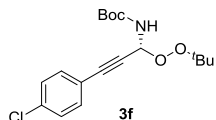

*tert*-butyl (*R*)-(1-(*tert*-butylperoxy)-3-(4-chlorophenyl)prop-2-yn-1-yl)carbamate **3f**

white solid, 90% yield, 32.0 mg,  $[\alpha]_{\text{D}}^{20} = +89.1$  (c 1.30 CHCl<sub>3</sub>).

**<sup>1</sup>H-NMR** (400 MHz, CDCl<sub>3</sub>):  $\delta$  (ppm): 7.39 (d, 2H,  $J = 8.8$  Hz), 7.29 (d, 2H,  $J = 8.4$  Hz), 6.22 (d, 1H,  $J = 9.2$  Hz), 5.61 (d, 1H,  $J = 8.4$  Hz), 1.48 (s, 9H), 1.29 (s, 9H).

**<sup>13</sup>C-NMR** (100 MHz, CDCl<sub>3</sub>):  $\delta$  (ppm): 153.92, 135.10, 133.14, 128.69, 120.20, 84.22, 83.97,

81.16, 80.69, 75.38, 28.24, 26.38.

**HRMS** calcd. for C<sub>18</sub>H<sub>24</sub>ClNO<sub>4</sub>Na [M+Na]<sup>+</sup>: 376.1286, found: 376.1286.

**HPLC analysis:** Daicel CHIRALCEL IC-3, *n*-hexane/*i*-PrOH = 90/10, flow rate = 1.0 mL/min, λ = 254 nm, retention time: t<sub>R</sub> = 5.7 min (minor), t<sub>R</sub> = 14.7 min (major).

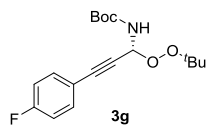

*tert*-butyl (*R*)-(1-(*tert*-butylperoxy)-3-(4-fluorophenyl)prop-2-yn-1-yl)carbamate **3g**

White solid, 92% yield, 31.3 mg, [α]<sub>D</sub><sup>20</sup> = +59.9 (c 1.60 CHCl<sub>3</sub>).

**<sup>1</sup>H-NMR** (400 MHz, CDCl<sub>3</sub>): δ (ppm): 7.39-7.35 (m, 2H), 6.96-6.92 (m, 2H), 6.15 (d, 1H, *J* = 9.2 Hz), 5.53 (d, 1H, *J* = 8.0 Hz), 1.41 (s, 9H), 1.22 (s, 9H).

**<sup>13</sup>C-NMR** (100 MHz, CDCl<sub>3</sub>): δ (ppm): 162.89 (d, *J* = 249 Hz), 153.95, 133.90 (d, *J* = 8 Hz), 117.80 (d, *J* = 3 Hz), 115.66 (d, *J* = 22 Hz), 84.09, 82.99, 81.12, 80.65, 75.41, 28.24, 26.38.

**<sup>19</sup>F NMR** (376 MHz, CDCl<sub>3</sub>): δ (ppm): -109.75.

**HRMS** calcd. for C<sub>18</sub>H<sub>24</sub>FNO<sub>4</sub>Na [M+Na]<sup>+</sup>: 360.1582, found: 360.1587.

**HPLC analysis:** Daicel CHIRALCEL IC-3, *n*-hexane/*i*-PrOH = 90/10, flow rate = 1.0 mL/min, λ = 254 nm, retention time: t<sub>R</sub> = 6.1 min (minor), t<sub>R</sub> = 16.7 min (major).

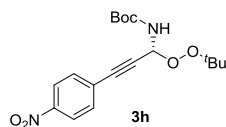

*tert*-butyl (*R*)-(1-(*tert*-butylperoxy)-3-(4-nitrophenyl)prop-2-yn-1-yl)carbamate **3h**

White solid, 98% yield, 35.7 mg, [α]<sub>D</sub><sup>20</sup> = +60.6 (c 1.60 CHCl<sub>3</sub>).

**<sup>1</sup>H-NMR** (400 MHz, CDCl<sub>3</sub>): δ (ppm): 8.20 (d, 2H, *J* = 8.8 Hz), 7.62 (d, 2H, *J* = 8.8 Hz), 6.27 (d, 1H, *J* = 9.2 Hz), 5.65 (d, 1H, *J* = 8.0 Hz), 1.49 (s, 9H), 1.30 (s, 9H).

**<sup>13</sup>C-NMR** (100 MHz, CDCl<sub>3</sub>): δ (ppm): 153.84, 147.61, 132.74, 128.54, 123.56, 88.40, 82.91, 81.33, 80.97, 75.20, 28.22, 26.37.

**HRMS** calcd. for C<sub>18</sub>H<sub>24</sub>N<sub>2</sub>O<sub>6</sub>Na [M+Na]<sup>+</sup>: 387.1527, found: 387.1523.

**HPLC analysis:** Daicel CHIRALCEL IC-3, *n*-hexane/*i*-PrOH = 90/10, flow rate = 1.0 mL/min, λ = 254 nm, retention time: t<sub>R</sub> = 13.4 min (minor), t<sub>R</sub> = 28.6 min (major).

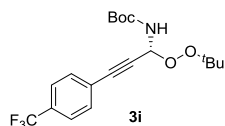

*tert*-butyl (*R*)-(1-(*tert*-butylperoxy)-3-(4-(trifluoromethyl)phenyl)prop-2-yn-1-yl)carbamate **3i**

White solid, 92% yield, 35.6 mg,  $[\alpha]_D^{20} = +68.9$  (c 0.85 CHCl<sub>3</sub>).

<sup>1</sup>H-NMR (400 MHz, CDCl<sub>3</sub>):  $\delta$  (ppm): 7.58 (t, 4H,  $J = 9.6$  Hz,  $J = 9.6$  Hz), 6.25 (d, 1H,  $J = 9.6$  Hz), 5.55 (d, 1H,  $J = 9.2$  Hz), 1.49 (s, 9H), 1.30 (s, 9H).

<sup>13</sup>C-NMR (100 MHz, CDCl<sub>3</sub>):  $\delta$  (ppm): 153.91, 132.19, 130.70 (d,  $J = 33$  Hz), 125.25 (t,  $J = 4$  Hz,  $J = 13$  Hz), 122.41, 85.65, 83.56, 81.25, 80.82, 75.25, 28.23, 26.37.

<sup>19</sup>F NMR (376 MHz, CDCl<sub>3</sub>):  $\delta$  (ppm): -62.94.

HRMS calcd. for C<sub>19</sub>H<sub>24</sub>F<sub>3</sub>NO<sub>4</sub>Na [M+Na]<sup>+</sup>: 410.1550, found: 410.1553.

HPLC analysis: Daicel CHIRALCEL AD-3, *n*-hexane/*i*-PrOH = 90/10, flow rate = 1.0 mL/min,  $\lambda = 254$  nm, retention time:  $t_R = 8.4$  min (minor),  $t_R = 11.6$  min (major).

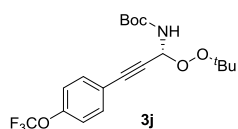

*tert*-butyl (*R*)-(1-(*tert*-butylperoxy)-3-(4-(trifluoromethoxy)phenyl)prop-2-yn-1-yl)carbamate **3j**

White solid, 84% yield, 34 mg,  $[\alpha]_D^{20} = +58.6$  (c 2.00 CHCl<sub>3</sub>).

<sup>1</sup>H-NMR (400 MHz, CDCl<sub>3</sub>):  $\delta$  (ppm): 7.51-7.47 (m, 2H), 7.17 (d, 2H,  $J = 8.0$  Hz), 6.23 (d, 1H,  $J = 9.2$  Hz), 5.62 (d, 1H,  $J = 8.4$  Hz), 1.48 (s, 9H), 1.29 (s, 9H).

<sup>13</sup>C-NMR (100 MHz, CDCl<sub>3</sub>):  $\delta$  (ppm): 153.94, 149.40, 133.50, 121.62, 120.62 (d,  $J = 31$  Hz), 119.05, 84.17, 83.64, 81.17, 80.73, 75.33, 28.23, 26.37.

<sup>19</sup>F NMR (376 MHz, CDCl<sub>3</sub>):  $\delta$  (ppm): -57.81.

HRMS calcd. for C<sub>19</sub>H<sub>24</sub>F<sub>3</sub>NO<sub>5</sub>Na [M+Na]<sup>+</sup>: 426.1499, found: 426.1495.

HPLC analysis: Daicel CHIRALCEL IC-3, *n*-hexane/*i*-PrOH = 90/10, flow rate = 1.0 mL/min,  $\lambda = 254$  nm, retention time:  $t_R = 4.4$  min (minor),  $t_R = 10.4$  min (major).

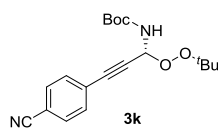

*tert*-butyl (*R*)-(1-(*tert*-butylperoxy)-3-(4-cyanophenyl)prop-2-yn-1-yl)carbamate **3k**

White solid, 91% yield, 31.3 mg,  $[\alpha]_D^{20} = +123.4$  (c 1.54 CHCl<sub>3</sub>).



**<sup>1</sup>H-NMR** (400 MHz, CDCl<sub>3</sub>): δ (ppm): 7.62 (d, 2H, *J* = 8.4 Hz), 7.55 (d, 2H, *J* = 8.4 Hz), 6.25 (d, 1H, *J* = 9.6 Hz), 5.64 (d, 1H, *J* = 9.2 Hz), 1.48 (s, 9H), 1.29 (s, 9H).

**<sup>13</sup>C-NMR** (100 MHz, CDCl<sub>3</sub>): δ (ppm): 153.86, 132.45, 132.03, 126.61, 118.22, 112.44, 87.60, 83.17, 81.31, 80.92, 75.18, 28.22, 26.37.

**HRMS** calcd. for C<sub>19</sub>H<sub>24</sub>N<sub>2</sub>O<sub>4</sub>Na [M+Na]<sup>+</sup>: 367.1628, found: 367.1621.

**HPLC analysis:** Daicel CHIRALCEL IC-3, *n*-hexane/*i*-PrOH = 80/20, flow rate = 1.0 mL/min, λ = 254 nm, retention time: t<sub>R</sub> = 9.3 min (minor), t<sub>R</sub> = 17.3 min (major).

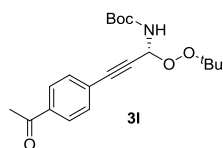

*tert*-butyl (*R*)-(3-(4-acetylphenyl)-1-(*tert*-butylperoxy)prop-2-yn-1-yl)carbamate **3l**

White solid, 95% yield, 34.3mg, [α]<sub>D</sub><sup>20</sup> = +82.8 (c 1.60 CHCl<sub>3</sub>).

**<sup>1</sup>H-NMR** (400 MHz, CDCl<sub>3</sub>): δ (ppm): 7.91 (d, 2H, *J* = 8.0 Hz), 7.55 (d, 2H, *J* = 8.4 Hz), 6.26 (d, 1H, *J* = 9.6 Hz), 5.67 (d, 1H, *J* = 8.0 Hz), 2.61 (s, 3H), 1.49 (s, 9H), 1.30 (s, 9H).

**<sup>13</sup>C-NMR** (100 MHz, CDCl<sub>3</sub>): δ (ppm): 197.26, 153.92, 136.83, 132.08, 128.18, 126.51, 86.41, 84.12, 81.24, 80.87, 75.31, 28.24, 26.38.

**HRMS** calcd. for C<sub>20</sub>H<sub>27</sub>NO<sub>5</sub>Na [M+Na]<sup>+</sup>: 384.1781, found: 384.1777.

**HPLC analysis:** Daicel CHIRALCEL IC-3, *n*-hexane/*i*-PrOH = 80/20, flow rate = 1.0 mL/min, λ = 254 nm, retention time: t<sub>R</sub> = 13.0 min (minor), t<sub>R</sub> = 31.3 min (major).

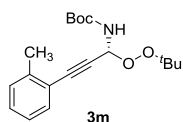

*tert*-butyl (*R*)-(1-(*tert*-butylperoxy)-3-(*o*-tolyl)prop-2-yn-1-yl)carbamate **3m**

White solid, 99% yield, 33.0 mg, [α]<sub>D</sub><sup>20</sup> = +51.7 (c 1.35 CHCl<sub>3</sub>).

**<sup>1</sup>H-NMR** (400 MHz, CDCl<sub>3</sub>): δ (ppm): 7.42 (d, 1H, *J* = 7.6 Hz), 7.25-7.18 (m, 2H), 7.13 (t, 1H, *J* = 7.6 Hz, *J* = 7.2 Hz), 6.27 (d, 1H, *J* = 9.6 Hz), 5.61 (d, 1H, 8.4 Hz), 2.43 (s, 3H), 1.49 (s, 9H), 1.29 (s, 9H).

**<sup>13</sup>C-NMR** (100 MHz, CDCl<sub>3</sub>): δ (ppm): 154.02, 140.72, 132.20, 129.46, 128.95, 125.51, 121.49, 86.93, 84.19, 80.98, 80.58, 75.59, 28.26, 26.40, 20.59.

**HRMS** calcd. for C<sub>19</sub>H<sub>27</sub>NO<sub>4</sub>Na [M+Na]<sup>+</sup>: 356.1832, found: 356.1830.

**HPLC analysis:** Daicel CHIRALCEL IC-3, *n*-hexane/*i*-PrOH = 90/10, flow rate = 1.0 mL/min, λ

= 254 nm, retention time:  $t_R = 5.2$  min (minor),  $t_R = 9.7$  min (major).

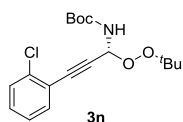

*tert*-butyl (*R*)-(1-(*tert*-butylperoxy)-3-(2-chlorophenyl)prop-2-yn-1-yl)carbamate **3n**

White solid, 83% yield, 29.4 mg,  $[\alpha]_D^{20} = +26.8$  (c 1.40 CHCl<sub>3</sub>).

**<sup>1</sup>H-NMR** (400 MHz, CDCl<sub>3</sub>):  $\delta$  (ppm): 7.49 (dd, 1H,  $J = 8.0$  Hz,  $J = 7.6$  Hz), 7.39 (dd, 1H,  $J = 8.0$  Hz,  $J = 7.2$  Hz), 7.30-7.25 (m, 1H), 7.21 (td, 1H,  $J = 7.6$  Hz,  $J = 7.6$  Hz), 6.28 (d, 1H,  $J = 9.6$  Hz), 5.66 (d, 1H,  $J = 8.4$  Hz), 1.49 (s, 9H), 1.29 (s, 9H).

**<sup>13</sup>C-NMR** (100 MHz, CDCl<sub>3</sub>):  $\delta$  (ppm): 153.96, 136.330, 133.69, 129.99, 129.32, 126.41, 121.78, 88.36, 81.79, 81.10, 80.67, 75.44, 28.25, 26.40.

**HRMS** calcd. for C<sub>18</sub>H<sub>24</sub>ClNO<sub>4</sub>Na [M+Na]<sup>+</sup>: 376.1286, found: 376.1288.

**HPLC analysis:** Daicel CHIRALCEL IC-3, *n*-hexane/*i*-PrOH = 90/10, flow rate = 1.0 mL/min,  $\lambda$

= 254 nm, retention time:  $t_R = 4.5$  min (minor),  $t_R = 11.3$  min (major).

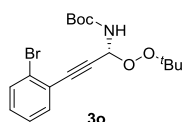

*tert*-butyl (*R*)-(3-(2-bromophenyl)-1-(*tert*-butylperoxy)prop-2-yn-1-yl)carbamate **3o**

White solid, 91% yield, 36.4 mg,  $[\alpha]_D^{20} = +34.1$  (c 1.50 CHCl<sub>3</sub>).

**<sup>1</sup>H-NMR** (400 MHz, CDCl<sub>3</sub>):  $\delta$  (ppm): 7.58 (d, 1H,  $J = 7.6$  Hz), 7.50 (dd, 1H,  $J = 7.6$  Hz,  $J = 7.6$  Hz), 7.27 (t, 1H,  $J = 7.2$  Hz,  $J = 8.0$  Hz), 7.21 (td, 1H,  $J = 8.0$  Hz,  $J = 7.6$  Hz), 6.28 (d, 1H,  $J = 10.0$  Hz), 5.67 (d, 1H,  $J = 9.6$  Hz), 1.48 (s, 9H), 1.30 (s, 9H).

**<sup>13</sup>C-NMR** (100 MHz, CDCl<sub>3</sub>):  $\delta$  (ppm): 153.98, 133.78, 132.48, 130.15, 127.00, 125.75, 123.95, 87.69, 83.49, 81.14, 80.69, 75.43, 28.26, 26.41.

**HRMS** calcd. for C<sub>18</sub>H<sub>24</sub>BrNO<sub>4</sub>Na [M+Na]<sup>+</sup>: 420.0781, found: 420.0779.

**HPLC analysis:** Daicel CHIRALCEL IC-3, *n*-hexane/*i*-PrOH = 90/10, flow rate = 1.0 mL/min,  $\lambda$

= 254 nm, retention time:  $t_R = 5.8$  min (minor),  $t_R = 18.3$  min (major).

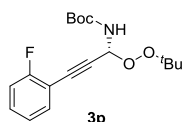

*tert*-butyl (*R*)-(1-(*tert*-butylperoxy)-3-(2-fluorophenyl)prop-2-yn-1-yl)carbamate **3p**

White solid, 92% yield, 31.0 mg,  $[\alpha]_D^{20} = +85.3$  (c 0.80 CHCl<sub>3</sub>).

**<sup>1</sup>H-NMR** (400 MHz, CDCl<sub>3</sub>):  $\delta$  (ppm): 7.45 (td, 1H,  $J = 7.6$  Hz,  $J = 7.2$  Hz), 7.36-7.30 (m, 1H),

7.12-7.05 (m, 2H), 6.26 (d, 1H,  $J = 10.0$  Hz), 5.66 (d, 1H,  $J = 9.2$  Hz), 1.48 (s, 9H), 1.29 (s, 9H).

$^{13}\text{C-NMR}$  (100 MHz,  $\text{CDCl}_3$ ):  $\delta$  (ppm): 163.0 (d,  $J = 251$  Hz), 153.95, 133.80, 130.78 (d,  $J = 8$  Hz), 123.95 (d,  $J = 3$  Hz), 115.58 (d,  $J = 21$  Hz), 110.39 (d,  $J = 16$  Hz), 88.37, 81.14, 80.66, 78.60, 75.38, 28.24, 26.38.

$^{19}\text{F NMR}$  (376 MHz,  $\text{CDCl}_3$ ):  $\delta$  (ppm): -109.33.

**HRMS** calcd.for  $\text{C}_{18}\text{H}_{24}\text{FNO}_4\text{Na}$   $[\text{M}+\text{Na}]^+$ : 360.1582, found: 360.1579.

**HPLC analysis:** Daicel CHIRALCEL IC-3, *n*-hexane/*i*-PrOH = 90/10, flow rate = 1.0 mL/min,  $\lambda = 254$  nm, retention time:  $t_{\text{R}} = 7.8$  min (minor),  $t_{\text{R}} = 40.3$  min (major).

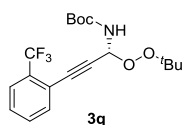

*tert*-butyl (*R*)-(1-(*tert*-butylperoxy)-3-(2-(trifluoromethyl)phenyl)prop-2-yn-1-yl)carbamate **3q**

White solid, 99% yield, 38.3 mg,  $[\alpha]_{\text{D}}^{20} = +71.2$  (c 1.80  $\text{CHCl}_3$ ).

$^1\text{H-NMR}$  (400 MHz,  $\text{CDCl}_3$ ):  $\delta$  (ppm): 7.66 (d, 1H,  $J = 7.6$  Hz), 7.61 (d, 1H,  $J = 7.6$  Hz), 7.50 (t, 1H,  $J = 7.2$  Hz,  $J = 7.6$  Hz), 7.46 (t, 1H,  $J = 7.2$  Hz,  $J = 7.6$  Hz), 6.26 (d, 1H,  $J = 9.6$  Hz), 5.61 (d, 1H,  $J = 8.4$  Hz), 1.49 (s, 9H), 1.28 (s, 9H).

$^{13}\text{C-NMR}$  (100 MHz,  $\text{CDCl}_3$ ):  $\delta$  (ppm): 153.96, 134.27, 131.38(m), 128.75, 125.87 (q,  $J = 5$  Hz,  $J = 10$  Hz), 124.67, 121.95, 120.00, 88.82, 81.06, 80.70, 77.21, 75.35, 28.23, 26.31.

$^{19}\text{F NMR}$  (376 MHz,  $\text{CDCl}_3$ ):  $\delta$  (ppm): -62.12.

**HRMS** calcd.for  $\text{C}_{19}\text{H}_{24}\text{F}_3\text{NO}_4\text{Na}$   $[\text{M}+\text{Na}]^+$ : 410.1550, found:410.1548.

**HPLC analysis:** Daicel CHIRALCEL IC-3, *n*-hexane/*i*-PrOH = 90/10, flow rate = 1.0 mL/min,  $\lambda = 254$  nm, retention time:  $t_{\text{R}} = 4.6$  min (minor),  $t_{\text{R}} = 7.4$  min (major).

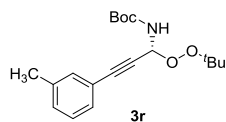

*tert*-butyl (*R*)-(1-(*tert*-butylperoxy)-3-(*m*-tolyl)prop-2-yn-1-yl)carbamate **3r**

White solid, 96% yield, 32.0 mg,  $[\alpha]_{\text{D}}^{20} = +40.2$  (c 1.35  $\text{CHCl}_3$ ).

$^1\text{H-NMR}$  (400 MHz,  $\text{CDCl}_3$ ):  $\delta$  (ppm): 7.27 (dd, 2H,  $J = 8.8$  Hz,  $J = 7.6$  Hz), 7.21 (t, 1H,  $J = 7.6$  Hz,  $J = 7.2$  Hz), 7.15 (d, 1H,  $J = 7.6$  Hz), 6.23 (d, 1H,  $J = 9.6$  Hz), 5.59 (d, 1H,  $J = 8.0$  Hz), 2.32 (s, 3H), 1.48 (s, 9H), 1.29 (s, 9H).

$^{13}\text{C-NMR}$  (100 MHz,  $\text{CDCl}_3$ ):  $\delta$  (ppm): 153.96, 138.01, 132.47, 129.85, 128.98, 128.20, 121.50, 85.35, 82.83, 81.06, 80.56, 75.53, 28.25, 26.40, 21.17.

**HRMS** calcd.for C<sub>19</sub>H<sub>27</sub>NO<sub>4</sub>Na [M+Na]<sup>+</sup>: 356.1832, found: 356.1833.

**HPLC analysis:** Daicel CHIRALCEL IC-3, *n*-hexane/*i*-PrOH = 90/10, flow rate = 1.0 mL/min, λ = 254 nm, retention time: t<sub>R</sub> = 7.0 min (minor), t<sub>R</sub> = 19.3 min (major).

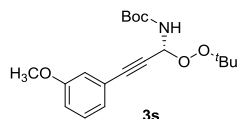

*tert*-butyl (*R*)-(1-(*tert*-butylperoxy)-3-(3-methoxyphenyl)prop-2-yn-1-yl)carbamate **3s**

White solid, 94% yield, 33.0 mg, [α]<sub>D</sub><sup>20</sup> = +74.9 (c 1.50 CHCl<sub>3</sub>).

**<sup>1</sup>H-NMR** (400 MHz, CDCl<sub>3</sub>): δ (ppm): 7.16 (dd, 1H, *J* = 9.6 Hz, *J* = 8.0 Hz), 6.98 (d, 1H, *J* = 7.6 Hz), 6.91 (s, 1H), 6.83 (dd, 1H, *J* = 8.4 Hz, *J* = 8.0 Hz), 6.16 (d, 1H, *J* = 9.2 Hz), 5.55 (d, 1H, *J* = 8.4 Hz), 3.72 (s, 9H), 1.41 (s, 9H), 1.22 (s, 9H).

**<sup>13</sup>C-NMR** (100 MHz, CDCl<sub>3</sub>): δ (ppm): 159.25, 153.97, 129.39, 124.43, 122.67, 116.67, 115.64, 85.06, 82.99, 81.10, 80.60, 75.44, 55.29, 28.25, 26.39.

**HRMS** calcd.for C<sub>19</sub>H<sub>27</sub>NO<sub>5</sub>Na [M+Na]<sup>+</sup>: 372.1781, found: 372.1583.

**HPLC analysis:** Daicel CHIRALCEL IC-3, *n*-hexane/*i*-PrOH = 90/10, flow rate = 1.0 mL/min, λ = 254 nm, retention time: t<sub>R</sub> = 9.0 min (minor), t<sub>R</sub> = 21.1 min (major).

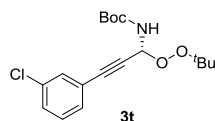

*tert*-butyl (*R*)-(1-(*tert*-butylperoxy)-3-(3-chlorophenyl)prop-2-yn-1-yl)carbamate **3t**

White solid, 90% yield, 31.8 mg, [α]<sub>D</sub><sup>20</sup> = +39.4 (c 1.40 CHCl<sub>3</sub>).

**<sup>1</sup>H-NMR** (400 MHz, CDCl<sub>3</sub>): δ (ppm): 7.45 (s, 1H), 7.35-7.32 (m, 2H), 7.27 (t, 1H, *J* = 7.6 Hz, *J* = 6.0 Hz), 6.23 (d, 1H, *J* = 9.6 Hz), 5.62 (d, 1H, *J* = 8.8 Hz), 1.48 (s, 9H), 1.29 (s, 9H).

**<sup>13</sup>C-NMR** (100 MHz, CDCl<sub>3</sub>): δ (ppm): 153.92, 134.18, 131.77, 130.04, 129.58, 129.29, 123.42, 84.46, 83.60, 81.19, 80.74, 75.31, 28.24, 26.39.

**HRMS** calcd.for C<sub>18</sub>H<sub>24</sub>ClNO<sub>4</sub>Na [M+Na]<sup>+</sup>: 376.1286, found: 376.1283.

**HPLC analysis:** Daicel CHIRALCEL IC-3, *n*-hexane/*i*-PrOH = 90/10, flow rate = 1.0 mL/min, λ = 254 nm, retention time: t<sub>R</sub> = 5.9 min (minor), t<sub>R</sub> = 11.4 min (major).

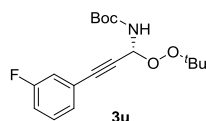

*tert*-butyl (*R*)-(1-(*tert*-butylperoxy)-3-(3-fluorophenyl)prop-2-yn-1-yl)carbamate **3u**

White solid, 91% yield, 31.0 mg, [α]<sub>D</sub><sup>20</sup> = +57.7 (c 1.00 CHCl<sub>3</sub>).

**<sup>1</sup>H-NMR** (400 MHz, CDCl<sub>3</sub>): δ (ppm): 7.30-7.23 (m, 2H), 7.16 (dd, 1H, *J* = 9.2 Hz, *J* = 9.6 Hz), 7.08-7.03 (m, 1H), 6.23 (d, 1H, *J* = 9.6 Hz), 5.62 (d, 1H, *J* = 8.8 Hz), 1.48 (s, 9H), 1.29 (s, 9H).

**<sup>13</sup>C-NMR** (100 MHz, CDCl<sub>3</sub>): δ (ppm): 162.24 (d, *J* = 245 Hz), 153.93, 129.95 (d, *J* = 8 Hz), 128.82 (d, *J* = 3 Hz), 123.53 (d, *J* = 10 Hz), 118.74 (d, *J* = 23 Hz), 116.39 (d, *J* = 21 Hz), 84.17, 83.76, 81.18, 75.31, 28.24, 26.38.

**<sup>19</sup>F NMR** (376 MHz, CDCl<sub>3</sub>): δ (ppm): -112.66.

**HRMS** calcd. for C<sub>18</sub>H<sub>24</sub>FNO<sub>4</sub>Na [M+Na]<sup>+</sup>: 360.1582, found: 360.1584.

**HPLC analysis:** Daicel CHIRALCEL IC-3, *n*-hexane/*i*-PrOH = 90/10, flow rate = 1.0 mL/min, λ = 254 nm, retention time: t<sub>R</sub> = 5.8 min (minor), t<sub>R</sub> = 10.4 min (major).

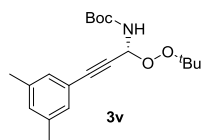

*tert*-butyl (*R*)-(1-(*tert*-butylperoxy)-3-(3,5-dimethylphenyl)prop-2-yn-1-yl)carbamate **3v**

White solid, 89% yield, 31.0 mg, [α]<sub>D</sub><sup>20</sup> = +74.4 (c 1.20 CHCl<sub>3</sub>).

**<sup>1</sup>H-NMR** (400 MHz, CDCl<sub>3</sub>): δ (ppm): 7.09 (s, 2H), 6.97 (s, 1H), 6.22 (d, 1H, *J* = 9.6 Hz), 5.58 (d, 1H, *J* = 8.0 Hz), 2.28 (s, 6H), 1.48 (s, 9H), 1.29 (s, 9H).

**<sup>13</sup>C-NMR** (100 MHz, CDCl<sub>3</sub>): δ (ppm): 153.99, 137.88, 130.87, 129.58, 121.30, 85.54, 82.43, 81.04, 80.51, 75.55, 28.26, 26.40, 21.06.

**HRMS** calcd. for C<sub>20</sub>H<sub>29</sub>NO<sub>4</sub>Na [M+Na]<sup>+</sup>: 370.1989, found: 370.1989.

**HPLC analysis:** Daicel CHIRALCEL IC-3, *n*-hexane/*i*-PrOH = 80/20, flow rate = 1.0 mL/min, λ = 254 nm, retention time: t<sub>R</sub> = 5.4 min (minor), t<sub>R</sub> = 12.9 min (major).

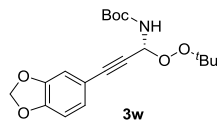

*tert*-butyl (*R*)-(3-(benzo[d][1,3]dioxol-5-yl)-1-(*tert*-butylperoxy)prop-2-yn-1-yl)carbamate **3w**

White solid, 99% yield, 36.0 mg, [α]<sub>D</sub><sup>20</sup> = +50.8 (c 1.70 CHCl<sub>3</sub>).

**<sup>1</sup>H-NMR** (400 MHz, CDCl<sub>3</sub>): δ (ppm): 6.99 (d, 1H, *J* = 8.0 Hz), 6.89 (s, 1H), 6.75 (d, 1H, *J* = 8.0 Hz), 6.21 (d, 1H, *J* = 9.6 Hz), 5.98 (s, 2H), 5.61 (d, 1H, *J* = 8.8 Hz), 1.48 (s, 9H), 1.29 (s, 9H).

**<sup>13</sup>C-NMR** (100 MHz, CDCl<sub>3</sub>): δ (ppm): 153.98, 148.43, 147.37, 126.79, 114.85, 111.77, 108.44, 101.40, 85.09, 81.58, 81.07, 80.55, 75.50, 28.25, 26.39.

**HRMS** calcd. for C<sub>19</sub>H<sub>25</sub>NO<sub>6</sub>Na [M+Na]<sup>+</sup>: 386.1574, found: 386.1569.

**HPLC analysis:** Daicel CHIRALCEL IC-3, *n*-hexane/*i*-PrOH = 80/20, flow rate = 1.0 mL/min,  $\lambda$  = 254 nm, retention time:  $t_R$  = 8.7 min (minor),  $t_R$  = 23.5 min (major).

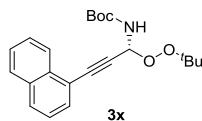

*tert*-butyl (*R*)-(1-(*tert*-butylperoxy)-3-(naphthalen-1-yl)prop-2-yn-1-yl)carbamate **3x**

White solid, 86% yield, 31.8 mg,  $[\alpha]_D^{20} = +63.7$  (c 1.20 CHCl<sub>3</sub>).

**<sup>1</sup>H-NMR** (400 MHz, CDCl<sub>3</sub>):  $\delta$  (ppm): 8.33 (d, 1H,  $J = 8.4$  Hz), 7.85 (d, 2H,  $J = 8.4$  Hz), 7.69 (d, 1H,  $J = 7.2$  Hz), 7.59-7.50 (m, 2H), 7.42 (t, 1H,  $J = 8.0$  Hz,  $J = 7.2$  Hz), 6.38 (d, 1H,  $J = 9.6$  Hz), 5.74 (d, 1H,  $J = 8.4$  Hz), 1.50 (s, 9H), 1.33 (s, 9H).

**<sup>13</sup>C-NMR** (100 MHz, CDCl<sub>3</sub>):  $\delta$  (ppm): 154.07, 133.37, 133.07, 130.92, 129.48, 126.96, 126.54, 126.13, 125.09, 119.36, 88.06, 83.43, 81.11, 80.07, 75.66, 28.29, 26.46.

**HRMS** calcd. for C<sub>22</sub>H<sub>27</sub>NO<sub>4</sub>Na [M+Na]<sup>+</sup>: 370.2013, found: 370.2008.

**HPLC analysis:** Daicel CHIRALCEL IC-3, *n*-hexane/*i*-PrOH = 90/10, flow rate = 1.0 mL/min,  $\lambda$  = 254 nm, retention time:  $t_R$  = 6.4 min (minor),  $t_R$  = 11.9 min (major).

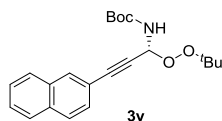

*tert*-butyl (*R*)-(1-(*tert*-butylperoxy)-3-(naphthalen-2-yl)prop-2-yn-1-yl)carbamate **3y**

White solid, 88% yield, 32.6 mg,  $[\alpha]_D^{20} = +73.0$  (c 1.58 CHCl<sub>3</sub>).

**<sup>1</sup>H-NMR** (400 MHz, CDCl<sub>3</sub>):  $\delta$  (ppm): 7.99 (s, 1H), 7.82-7.76 (m, 3H), 7.50 (t, 3H,  $J = 9.6$  Hz,  $J = 5.6$  Hz), 6.29 (d, 1H,  $J = 10.0$  Hz), 5.67 (d, 1H,  $J = 9.2$  Hz), 1.49 (s, 9H), 1.31 (s, 9H).

**<sup>13</sup>C-NMR** (100 MHz, CDCl<sub>3</sub>):  $\delta$  (ppm): 154.01, 133.10, 132.78, 132.20, 128.26, 128.04, 127.86, 127.79, 127.02, 126.66, 118.96, 85.51, 83.47, 81.16, 80.63, 75.56, 28.28, 26.44.

**HRMS** calcd. for C<sub>22</sub>H<sub>27</sub>NO<sub>4</sub>Na [M+Na]<sup>+</sup>: 370.2013, found: 370.2011.

**HPLC analysis:** Daicel CHIRALCEL IC-3, *n*-hexane/*i*-PrOH = 85/15, flow rate = 1.0 mL/min,  $\lambda$  = 254 nm, retention time:  $t_R$  = 5.8 min (minor),  $t_R$  = 12.9 min (major).

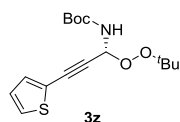

*tert*-butyl (*R*)-(1-(*tert*-butylperoxy)-3-(thiophen-2-yl)prop-2-yn-1-yl)carbamate **3z**

White solid, 97% yield, 31.5 mg,  $[\alpha]_D^{20} = +41.4$  (c 1.30 CHCl<sub>3</sub>).

**<sup>1</sup>H-NMR** (400 MHz, CDCl<sub>3</sub>):  $\delta$  (ppm): 7.29 (d, 1H,  $J = 5.2$  Hz), 7.26 (d, 1H,  $J = 3.6$  Hz), 6.98 (dd,

1H,  $J = 5.2$  Hz,  $J = 5.2$  Hz), 6.24 (d, 1H,  $J = 9.6$  Hz), 5.61 (d, 1H,  $J = 8.8$  Hz), 1.48 (s, 9H), 1.29 (s, 9H).

$^{13}\text{C-NMR}$  (100 MHz,  $\text{CDCl}_3$ ):  $\delta$  (ppm): 153.91, 133.10, 127.99, 126.99, 121.53, 87.04, 81.19, 80.68, 78.64, 75.50, 28.25, 26.39.

**HRMS** calcd. for  $\text{C}_{16}\text{H}_{23}\text{NO}_4\text{SNa}$   $[\text{M}+\text{Na}]^+$ : 348.1240, found: 348.1235.

**HPLC analysis:** Daicel CHIRALCEL IC-3, *n*-hexane/*i*-PrOH = 90/10, flow rate = 1.0 mL/min,  $\lambda = 254$  nm, retention time:  $t_{\text{R}} = 7.2$  min (minor),  $t_{\text{R}} = 18.0$  min (major).

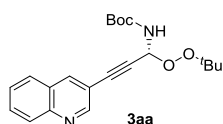

*tert*-butyl (*R*)-(1-(*tert*-butylperoxy)-3-(quinolin-3-yl)prop-2-yn-1-yl)carbamate **3aa**

White solid, 91% yield, 33.7 mg,  $[\alpha]_{\text{D}}^{20} = +118.3$  (c 1.30  $\text{CHCl}_3$ ).

$^1\text{H-NMR}$  (400 MHz,  $\text{CDCl}_3$ ):  $\delta$  (ppm): 8.93 (s, 1H), 8.23 (s, 1H), 8.11 (d, 1H,  $J = 8.4$  Hz), 7.80-7.60 (m, 2H), 7.58 (t, 1H,  $J = 7.2$  Hz,  $J = 7.6$  Hz), 6.32 (d, 1H,  $J = 9.6$  Hz), 5.88 (s, 1H), 1.50 (s, 9H), 1.31 (s, 9H).

$^{13}\text{C-NMR}$  (100 MHz,  $\text{CDCl}_3$ ):  $\delta$  (ppm): 153.99, 151.92, 147.13, 139.22, 130.49, 129.45, 127.68, 127.43, 126.99, 115.87, 86.63, 82.32, 81.28, 80.81, 75.36, 28.26, 26.41.

**HRMS** calcd. for  $\text{C}_{21}\text{H}_{26}\text{N}_2\text{O}_4\text{Na}$   $[\text{M}+\text{Na}]^+$ : 371.1965, found: 371.1963.

**HPLC analysis:** Daicel CHIRALCEL IC-3, *n*-hexane/*i*-PrOH = 70/30, flow rate = 1.0 mL/min,  $\lambda = 254$  nm, retention time:  $t_{\text{R}} = 11.8$  min (minor),  $t_{\text{R}} = 17.0$  min (major).

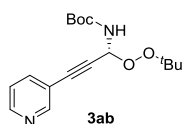

*tert*-butyl (*R*)-(1-(*tert*-butylperoxy)-3-(pyridin-3-yl)prop-2-yn-1-yl)carbamate **3ab**

White solid, 89% yield, 28.5 mg,  $[\alpha]_{\text{D}}^{20} = +16.5$  (c 1.15  $\text{CHCl}_3$ ).

$^1\text{H-NMR}$  (400 MHz,  $\text{CDCl}_3$ ):  $\delta$  (ppm): 8.71 (d, 1H,  $J = 1.2$  Hz), 8.58 (dd, 1H,  $J = 4.8$  Hz,  $J = 4.8$  Hz), 7.77-7.74 (m, 1H), 7.27 (t, 1H,  $J = 7.6$  Hz,  $J = 5.2$  Hz), 6.26 (d, 1H,  $J = 9.6$  Hz), 5.90 (s, 1H), 1.49 (s, 9H), 1.29 (s, 9H).

$^{13}\text{C-NMR}$  (100 MHz,  $\text{CDCl}_3$ ):  $\delta$  (ppm): 153.98, 152.49, 149.24, 138.91, 123.02, 118.97, 86.81, 81.66, 81.25, 80.75, 75.24, 28.24, 26.37.

**HRMS** calcd. for  $\text{C}_{17}\text{H}_{24}\text{N}_2\text{O}_4\text{Na}$   $[\text{M}+\text{Na}]^+$ : 321.1809, found: 321.1810.

**HPLC analysis:** Daicel CHIRALCEL IC-3, *n*-hexane/*i*-PrOH = 70/30, flow rate = 1.0 mL/min,  $\lambda$

= 254 nm, retention time:  $t_R$  = 8.4 min (minor),  $t_R$  = 10.4 min (major).

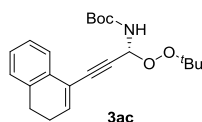

*tert*-butyl (*R*)-(1-(*tert*-butylperoxy)-3-(3,4-dihydronaphthalen-1-yl)prop-2-yn-1-yl)carbamate **3ac**

Colorless oil, 85% yield, 31.5 mg,  $[\alpha]_D^{20}$  = +87.3 (c 0.50 CHCl<sub>3</sub>).

<sup>1</sup>H-NMR (400 MHz, CDCl<sub>3</sub>):  $\delta$  (ppm): 7.55 (d, 1H,  $J$  = 7.6 Hz), 7.24-7.16 (m, 2H), 7.10 (d, 1H,  $J$  = 7.2 Hz), 6.51 (t, 1H,  $J$  = 4.8 Hz,  $J$  = 4.8 Hz), 6.23 (d, 1H,  $J$  = 9.6 Hz), 5.61 (d, 1H,  $J$  = 8.0 Hz), 2.79 (t, 2H,  $J$  = 8.0 Hz,  $J$  = 8.4 Hz), 2.41-2.36 (m, 2H), 1.48 (s, 9H), 1.29 (s, 9H).

<sup>13</sup>C-NMR (100 MHz, CDCl<sub>3</sub>):  $\delta$  (ppm): 154.02, 137.01, 134.84, 132.11, 127.82, 127.39, 126.64, 125.08, 120.69, 84.11, 83.26, 81.00, 80.57, 75.51, 28.26, 26.97, 26.41, 23.62.

HRMS calcd. for C<sub>22</sub>H<sub>29</sub>NO<sub>4</sub>Na [M+Na]<sup>+</sup>: 394.1989, found: 394.1982.

HPLC analysis: Daicel CHIRALCEL IC-3, *n*-hexane/*i*-PrOH = 80/20, flow rate = 1.0 mL/min,  $\lambda$

= 254 nm, retention time:  $t_R$  = 5.4 min (minor),  $t_R$  = 11.0 min (major).

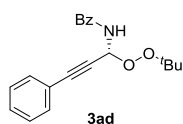

(*R*)-*N*-(1-(*tert*-butylperoxy)-3-phenylprop-2-yn-1-yl)benzamide **3ad**

White solid, 90% yield, 29.0 mg,  $[\alpha]_D^{20}$  = +106.5 (c 0.85 CHCl<sub>3</sub>).

<sup>1</sup>H-NMR (400 MHz, CDCl<sub>3</sub>):  $\delta$  (ppm): 7.86 (d, 2H,  $J$  = 7.2 Hz), 7.56-7.53 (m, 1H), 7.50-7.45 (m, 4H), 7.38-7.30 (m, 3H), 7.14 (d, 1H,  $J$  = 9.2 Hz), 6.76 (d, 1H,  $J$  = 9.2 Hz), 1.30 (s, 9H).

<sup>13</sup>C-NMR (100 MHz, CDCl<sub>3</sub>):  $\delta$  (ppm): 166.16, 133.43, 132.17, 131.95, 129.08, 128.71, 128.36, 127.33, 121.61, 85.52, 83.39, 81.40, 73.86, 26.47.

HRMS calcd. for C<sub>20</sub>H<sub>21</sub>NO<sub>3</sub>Na [M+Na]<sup>+</sup>: 346.1414, found: 346.1410.

HPLC analysis: Daicel CHIRALCEL IC-3, *n*-hexane/*i*-PrOH = 90/10, flow rate = 1.0 mL/min,  $\lambda$

= 254 nm, retention time:  $t_R$  = 13.2 min (minor),  $t_R$  = 22.6 min (major).

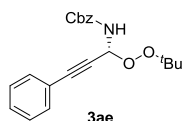

benzyl (*R*)-(1-(*tert*-butylperoxy)-3-phenylprop-2-yn-1-yl)carbamate **3ae**

White solid, 90% yield, 31.8 mg,  $[\alpha]_D^{20}$  = +86.8 (c 1.38 CHCl<sub>3</sub>).

<sup>1</sup>H-NMR (400 MHz, CDCl<sub>3</sub>):  $\delta$  (ppm): 7.44 (t, 2H,  $J$  = 6.4 Hz,  $J$  = 8.0 Hz), 7.37 (d, 3H,  $J$  = 6.4 Hz), 7.35-7.29 (m, 4H), 6.30 (d, 1H,  $J$  = 9.6 Hz), 5.84 (d, 1H,  $J$  = 8.8 Hz), 5.17 (s, 2H), 1.27 (s,



9H).

<sup>13</sup>C-NMR (100 MHz, CDCl<sub>3</sub>): δ (ppm): 154.80, 135.96, 131.93, 129.09, 128.56, 128.35, 128.31, 128.28, 121.53, 85.54, 82.80, 81.28, 75.90, 67.32, 26.38.

HRMS calcd.for C<sub>21</sub>H<sub>23</sub>NO<sub>4</sub>Na [M+Na]<sup>+</sup>: 376.1519, found: 376.1515.

HPLC analysis: Daicel CHIRALCEL IC-3, *n*-hexane/*i*-PrOH = 90/10, flow rate = 1.0 mL/min, λ = 254 nm, retention time: t<sub>R</sub> = 13.9 min (major), t<sub>R</sub> = 15.7 min (minor).

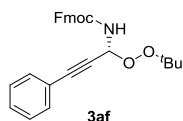

(9H-fluoren-9-yl)methyl (*R*)-(1-(*tert*-butylperoxy)-3-phenylprop-2-yn-1-yl)carbamate **3af**

White solid, 91% yield, 40.1 mg, [α]<sub>D</sub><sup>20</sup> = +70.9 (c 1.50 CHCl<sub>3</sub>).

<sup>1</sup>H-NMR (400 MHz, CDCl<sub>3</sub>): δ (ppm): 7.77 (d, 2H, *J* = 7.6 Hz), 7.62 (d, 2H, *J* = 7.2 Hz), 7.47 (t, 2H, *J* = 6.8 Hz, *J* = 7.6 Hz), 7.41 (t, 2H, *J* = 7.2 Hz, *J* = 7.6 Hz), 7.35-7.30 (m, 5H), 6.31 (d, 1H, *J* = 9.6 Hz), 5.88 (d, 2H, *J* = 9.6 Hz), 4.57-4.40 (m, 2H), 4.26 (t, 1H, *J* = 6.8 Hz, *J* = 6.8 Hz), 1.28 (s, 9H).

<sup>13</sup>C-NMR (100 MHz, CDCl<sub>3</sub>): δ (ppm): 154.86, 143.71, 141.34, 131.95, 129.13, 128.38, 127.79, 127.14, 125.12, 121.54, 120.03, 85.63, 82.82, 81.31, 75.92, 67.33, 47.07, 26.44.

HRMS calcd.for C<sub>28</sub>H<sub>27</sub>NO<sub>4</sub>Na [M+Na]<sup>+</sup>: 464.1832, found: 464.1832.

HPLC analysis: Daicel CHIRALCEL AD-3, *n*-hexane/*i*-PrOH = 90/10, flow rate = 1.0 mL/min, λ = 254 nm, retention time: t<sub>R</sub> = 10.1 min (major), t<sub>R</sub> = 13.6 min (minor).

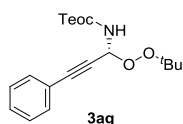

2,2,2-trichloroethyl (*R*)-(1-(*tert*-butylperoxy)-3-phenylprop-2-yn-1-yl)carbamate **3ag**

White solid, 90% yield, 35.6 mg, [α]<sub>D</sub><sup>20</sup> = +115.2 (c 1.64 CHCl<sub>3</sub>).

<sup>1</sup>H-NMR (400 MHz, CDCl<sub>3</sub>): δ (ppm): 7.41 (d, 2H, *J* = 6.8 Hz), 7.31-7.26 (m, 3H), 6.23 (d, 1H, *J* = 9.6 Hz), 5.65 (d, 1H, *J* = 8.4 Hz), 4.17 (t, 2H, *J* = 8.4 Hz, *J* = 8.0 Hz), 1.25 (s, 9H), 0.97 (t, 2H, *J* = 8.0 Hz, *J* = 8.0 Hz), 0.00 (s, 9H).

<sup>13</sup>C-NMR (100 MHz, CDCl<sub>3</sub>): δ (ppm): 156.56, 133.38, 130.50, 129.80, 123.09, 86.79, 84.53, 82.70, 77.31, 65.35, 27.88, 19.15, 0.00.

HRMS calcd.for C<sub>19</sub>H<sub>29</sub>NO<sub>4</sub>SiNa [M+Na]<sup>+</sup>: 386.1758, found: 386.1760.

HPLC analysis: Daicel CHIRALCEL IC-3, *n*-hexane/*i*-PrOH = 90/10, flow rate = 1.0 mL/min, λ

= 254 nm, retention time:  $t_R$  = 8.0 min (major),  $t_R$  = 11.6 min (minor).

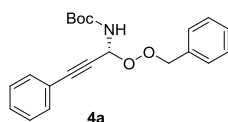

*tert*-butyl (*R*)-(1-(benzylperoxy)-3-phenylprop-2-yn-1-yl)carbamate **4a**

White solid, 89% yield, 31.4 mg,  $[\alpha]_D^{20}$  = +54.5 (c 1.10 CHCl<sub>3</sub>).

<sup>1</sup>H-NMR (400 MHz, CDCl<sub>3</sub>):  $\delta$  (ppm): 7.45 (dd, 2H,  $J$  = 7.6 Hz,  $J$  = 8.0 Hz), 7.40 (dd, 2H,  $J$  = 8.0 Hz,  $J$  = 7.2 Hz), 7.38-7.30 (m, 6H), 6.32 (d, 1H,  $J$  = 8.8 Hz), 5.67 (d, 1H,  $J$  = 4.8 Hz), 5.13 (d, 2H,  $J$  = 2.0 Hz), 1.47 (s, 9H).

<sup>13</sup>C-NMR (100 MHz, CDCl<sub>3</sub>):  $\delta$  (ppm): 153.84, 135.25, 131.92, 129.26, 129.13, 128.52, 128.46, 128.39, 121.50, 85.45, 82.87, 80.91, 77.84, 75.55, 28.26.

HRMS calcd. for C<sub>21</sub>H<sub>23</sub>NO<sub>4</sub>Na [M+Na]<sup>+</sup>: 376.1519, found: 376.1517.

HPLC analysis: Daicel CHIRALCEL IC-3, *n*-hexane/*i*-PrOH = 85/15, flow rate = 1.0 mL/min,  $\lambda$

= 254 nm, retention time:  $t_R$  = 8.8 min (minor),  $t_R$  = 11.3 min (major).

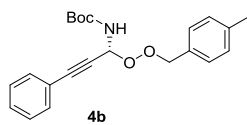

*tert*-butyl (*R*)-(1-((4-methylbenzyl)peroxy)-3-phenylprop-2-yn-1-yl)carbamate **4b**

White solid, 90% yield, 33.0 mg,  $[\alpha]_D^{20}$  = +18.9 (c 0.80 CHCl<sub>3</sub>).

<sup>1</sup>H-NMR (400 MHz, CDCl<sub>3</sub>):  $\delta$  (ppm): 7.46-7.38 (m, 2H), 7.37-7.28 (m, 5H), 7.15 (d, 2H,  $J$  = 7.6 Hz), 6.31 (d, 1H,  $J$  = 8.8 Hz), 5.67 (d, 1H,  $J$  = 5.6 Hz), 5.09 (q, 2H,  $J$  = 10.4 Hz,  $J$  = 10.8 Hz), 2.33 (s, 3H), 1.47 (s, 9H).

<sup>13</sup>C-NMR (100 MHz, CDCl<sub>3</sub>):  $\delta$  (ppm): 153.82, 138.38, 132.12, 131.91, 129.42, 129.16, 129.10, 128.38, 121.55, 85.35, 82.98, 80.85, 77.72, 75.52, 28.26, 21.25.

HRMS calcd. for C<sub>22</sub>H<sub>25</sub>NO<sub>4</sub>Na [M+Na]<sup>+</sup>: 390.1676, found: 390.1672.

HPLC analysis: Daicel CHIRALCEL IC-3, *n*-hexane/*i*-PrOH = 85/15, flow rate = 1.0 mL/min,  $\lambda$

= 254 nm, retention time:  $t_R$  = 9.4 min (minor),  $t_R$  = 13.8 min (major).

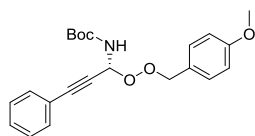

*tert*-butyl (*R*)-(1-((4-methoxybenzyl)peroxy)-3-phenylprop-2-yn-1-yl)carbamate **4c**

White solid, 91% yield, 35.0 mg,  $[\alpha]_D^{20}$  = +81.2 (c 1.63 CHCl<sub>3</sub>).

**<sup>1</sup>H-NMR** (400 MHz, CDCl<sub>3</sub>): δ (ppm): 7.46-7.44 (m, 2H), 7.38-7.29 (m, 5H), 6.86 (d, 1H, *J* = 8.8 Hz), 6.30 (d, 1H, *J* = 8.4 Hz), 5.06 (q, 2H, *J* = 10.4 Hz, *J* = 10.4 Hz), 3.78 (s, 3H), 1.47 (s, 9H).

**<sup>13</sup>C-NMR** (100 MHz, CDCl<sub>3</sub>): δ (ppm): 159.92, 153.84, 131.90, 131.04, 129.10, 128.38, 127.18, 121.54, 113.88, 85.35, 83.01, 80.84, 77.46, 75.51, 55.25, 28.25.

**HRMS** calcd. for C<sub>22</sub>H<sub>25</sub>NO<sub>5</sub>Na [M+Na]<sup>+</sup>: 406.1625, found: 406.1626.

**HPLC analysis:** Daicel CHIRALCEL IC-3, *n*-hexane/*i*-PrOH = 85/15, flow rate = 1.0 mL/min, λ = 254 nm, retention time: t<sub>R</sub> = 9.2 min (minor), t<sub>R</sub> = 14.4 min (major).

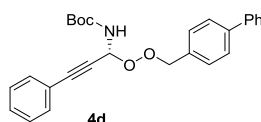

*tert*-butyl (*R*)-((1-((1,1'-biphenyl)-4-ylmethyl)peroxy)-3-phenylprop-2-yn-1-yl)carbamate **4d**

White solid, 97% yield, 41.7 mg, [α]<sub>D</sub><sup>20</sup> = +48.2 (c 1.65 CHCl<sub>3</sub>).

**<sup>1</sup>H-NMR** (400 MHz, CDCl<sub>3</sub>): δ (ppm): 7.57 (d, 4H, *J* = 7.6 Hz), 7.49-7.41 (m, 6H), 7.37-7.29 (m, 4H), 6.35 (d, 1H, *J* = 9.2 Hz), 5.72 (d, 1H, *J* = 7.6 Hz), 5.18 (t, 2H, *J* = 12.4 Hz, *J* = 11.2 Hz), 1.47 (s, 9H).

**<sup>13</sup>C-NMR** (100 MHz, CDCl<sub>3</sub>): δ (ppm): 153.89, 141.48, 140.78, 134.23, 131.93, 129.75, 129.16, 128.80, 128.42, 127.43, 127.25, 127.17, 121.49, 85.49, 82.89, 80.93, 77.55, 75.58, 28.28.

**HRMS** calcd. for C<sub>27</sub>H<sub>27</sub>NO<sub>4</sub>Na [M+Na]<sup>+</sup>: 452.1832, found: 452.1836.

**HPLC analysis:** Daicel CHIRALCEL IC-3, *n*-hexane/*i*-PrOH = 85/15, flow rate = 1.0 mL/min, λ = 254 nm, retention time: t<sub>R</sub> = 9.6 min (minor), t<sub>R</sub> = 15.1 min (major).

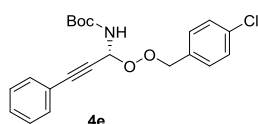

*tert*-butyl (*R*)-((1-((4-chlorobenzyl)peroxy)-3-phenylprop-2-yn-1-yl)carbamate **4e**

White solid, 90% yield, 35.0 mg, [α]<sub>D</sub><sup>20</sup> = +76.5 (c 1.20 CHCl<sub>3</sub>).

**<sup>1</sup>H-NMR** (400 MHz, CDCl<sub>3</sub>): δ (ppm): 7.46-7.44 (m, 2H), 7.39-7.35 (m, 2H), 7.34-7.30 (m, 5H), 6.30 (d, 1H, *J* = 8.8 Hz), 5.66 (d, 1H, *J* = 6.0 Hz), 5.09 (s, 2H), 1.47 (s, 9H).

**<sup>13</sup>C-NMR** (100 MHz, CDCl<sub>3</sub>): δ (ppm): 153.80, 134.39, 133.97, 131.90, 130.53, 129.20, 128.64, 128.41, 121.38, 85.60, 82.65, 80.99, 77.36, 28.24.

**HRMS** calcd. for C<sub>21</sub>H<sub>22</sub>ClNO<sub>4</sub>Na [M+Na]<sup>+</sup>: 410.1130, found: 410.1131.

**HPLC analysis:** Daicel CHIRALCEL IC-3, *n*-hexane/*i*-PrOH = 85/15, flow rate = 1.0 mL/min, λ = 254 nm, retention time: t<sub>R</sub> = 6.6 min (minor), t<sub>R</sub> = 11.3 min (major).

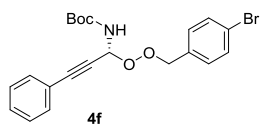

*tert*-butyl (*R*)-1-((4-bromobenzyl)peroxy)-3-phenylprop-2-yn-1-ylcarbamate **4f**

White solid, 85% yield, 36.7 mg,  $[\alpha]_{\text{D}}^{20} = +38.8$  (c 1.45 CHCl<sub>3</sub>).

<sup>1</sup>H-NMR (400 MHz, CDCl<sub>3</sub>):  $\delta$  (ppm): 7.47-7.43 (m, 4H), 7.36-7.30 (m, 3H), 7.27 (d, 2H,  $J = 8.0$  Hz), 6.29 (d, 1H,  $J = 9.2$  Hz), 5.66 (d, 1H,  $J = 7.6$  Hz), 5.06 (s, 2H), 1.47 (s, 9H).

<sup>13</sup>C-NMR (100 MHz, CDCl<sub>3</sub>):  $\delta$  (ppm): 153.80, 134.49, 131.90, 131.60, 130.82, 129.20, 128.42, 122.58, 121.36, 85.60, 82.63, 80.99, 76.90, 75.54, 28.25.

HRMS calcd. for C<sub>21</sub>H<sub>22</sub>BrNO<sub>4</sub>Na [M+Na]<sup>+</sup>: 454.0624, found: 454.0626.

HPLC analysis: Daicel CHIRALCEL IC-3, *n*-hexane/*i*-PrOH = 85/15, flow rate = 1.0 mL/min,  $\lambda = 254$  nm, retention time:  $t_{\text{R}} = 6.7$  min (minor),  $t_{\text{R}} = 11.8$  min (major).

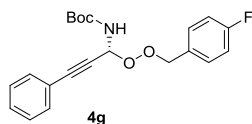

*tert*-butyl (*R*)-1-((4-fluorobenzyl)peroxy)-3-phenylprop-2-yn-1-ylcarbamate **4g**

White solid, 91% yield, 33.8 mg,  $[\alpha]_{\text{D}}^{20} = +63.4$  (c 1.45 CHCl<sub>3</sub>).

<sup>1</sup>H-NMR (400 MHz, CDCl<sub>3</sub>):  $\delta$  (ppm): 7.45-7.43 (m, 2H), 7.39-7.30 (m, 5H), 7.02 (td, 2H,  $J = 8.8$  Hz,  $J = 8.8$  Hz), 6.30 (d, 1H,  $J = 8.4$  Hz), 5.67 (s, 1H), 5.08 (s, 2H), 1.47 (s, 9H).

<sup>13</sup>C-NMR (100 MHz, CDCl<sub>3</sub>):  $\delta$  (ppm): 162.90 (d,  $J = 245$  Hz), 153.81, 131.90, 131.15 (d,  $J = 8$  Hz), 129.17, 128.40, 121.42, 115.36 (d,  $J = 21$  Hz), 85.55, 82.73, 80.95, 76.95, 75.54, 28.24.

<sup>19</sup>F NMR (376 MHz, CDCl<sub>3</sub>):  $\delta$  (ppm): -113.40.

HRMS calcd. for C<sub>21</sub>H<sub>22</sub>FNO<sub>4</sub>Na [M+Na]<sup>+</sup>: 394.1425, found: 394.1425.

HPLC analysis: Daicel CHIRALCEL IC-3, *n*-hexane/*i*-PrOH = 85/15, flow rate = 1.0 mL/min,  $\lambda = 254$  nm, retention time:  $t_{\text{R}} = 6.7$  min (minor),  $t_{\text{R}} = 10.3$  min (major).

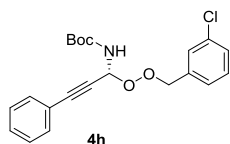

*tert*-butyl (*R*)-1-((3-chlorobenzyl)peroxy)-3-phenylprop-2-yn-1-ylcarbamate **4h**

White solid, 92% yield, 35.7 mg,  $[\alpha]_{\text{D}}^{20} = +44.7$  (c 1.48 CHCl<sub>3</sub>).

<sup>1</sup>H-NMR (400 MHz, CDCl<sub>3</sub>):  $\delta$  (ppm): 7.47-7.44 (m, 2H), 7.41 (s, 1H), 7.38-7.31 (m, 3H), 7.30-7.26 (m, 3H), 6.31 (d, 1H,  $J = 8.8$  Hz), 5.57 (d, 1H,  $J = 8.0$  Hz), 5.09 (s, 2H), 1.48 (s, 9H).

<sup>13</sup>C-NMR (100 MHz, CDCl<sub>3</sub>): δ (ppm): 153.81, 137.53, 134.32, 131.93, 129.71, 129.19, 129.08, 128.58, 128.40, 127.06, 121.36, 85.68, 82.60, 81.03, 76.87, 75.57, 28.25.

HRMS calcd.for C<sub>21</sub>H<sub>22</sub>ClNO<sub>4</sub>Na [M+Na]<sup>+</sup>: 410.1130, found: 410.1128.

HPLC analysis: Daicel CHIRALCEL IC-3, *n*-hexane/*i*-PrOH = 85/15, flow rate = 1.0 mL/min, λ = 254 nm, retention time: t<sub>R</sub> = 6.7 min (minor), t<sub>R</sub> = 11.0 min (major).

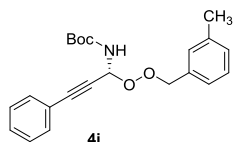

*tert*-butyl (*R*)-((3-methylbenzyl)peroxy)-3-phenylprop-2-yn-1-ylcarbamate **4i**

White solid, 90% yield, 33.0 mg, [α]<sub>D</sub><sup>20</sup> = +81.0 (c 1.20 CHCl<sub>3</sub>).

<sup>1</sup>H-NMR (400 MHz, CDCl<sub>3</sub>): δ (ppm): 7.46 (d, 2H, *J* = 7.6 Hz), 7.37-7.30 (m, 3H), 7.24-7.19 (m, 3H), 7.13 (d, 1H, *J* = 7.2 Hz), 6.32 (d, 1H, *J* = 8.8 Hz), 5.70 (s, 1H), 5.10 (t, 2H, *J* = 12.0 Hz, *J* = 12.0 Hz), 2.32 (s, 3H), 1.47 (s, 9H).

<sup>13</sup>C-NMR (100 MHz, CDCl<sub>3</sub>): δ (ppm): 153.84, 138.09, 135.03, 131.92, 130.03, 129.30, 129.12, 128.39, 128.36, 126.36, 121.53, 85.41, 82.97, 80.88, 77.91, 75.54, 28.26, 21.30.

HRMS calcd.for C<sub>22</sub>H<sub>25</sub>NO<sub>4</sub>Na [M+Na]<sup>+</sup>: 390.1676, found: 390.1677.

HPLC analysis: Daicel CHIRALCEL IC-3, *n*-hexane/*i*-PrOH = 85/15, flow rate = 1.0 mL/min, λ = 254 nm, retention time: t<sub>R</sub> = 8.0 min (minor), t<sub>R</sub> = 10.9 min (major).

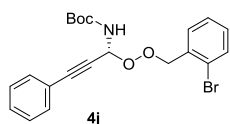

*tert*-butyl (*R*)-((2-bromobenzyl)peroxy)-3-phenylprop-2-yn-1-ylcarbamate **4j**

White solid, 99% yield, 42.8 mg, [α]<sub>D</sub><sup>20</sup> = +67.2 (c 1.50 CHCl<sub>3</sub>).

<sup>1</sup>H-NMR (400 MHz, CDCl<sub>3</sub>): δ (ppm): 7.53 (t, 2H, *J* = 7.2 Hz, *J* = 6.0 Hz), 7.45 (d, 2H, *J* = 7.2 Hz), 7.37-7.25 (m, 4H), 7.16 (t, 1H, *J* = 7.6 Hz, *J* = 7.6 Hz), 6.33 (d, 1H, *J* = 8.4 Hz), 5.74 (s, 1H), 5.26 (s, 2H), 1.48 (s, 9H).

<sup>13</sup>C-NMR (100 MHz, CDCl<sub>3</sub>): δ (ppm): 153.79, 135.16, 132.73, 131.94, 130.89, 129.77, 129.12, 128.36, 127.41, 123.70, 121.47, 85.55, 82.76, 80.97, 76.95, 75.66, 28.26.

HRMS calcd.for C<sub>21</sub>H<sub>22</sub>BrNO<sub>4</sub>Na [M+Na]<sup>+</sup>: 454.0624, found: 454.0624.

HPLC analysis: Daicel CHIRALCEL IC-3, *n*-hexane/*i*-PrOH = 85/15, flow rate = 1.0 mL/min, λ = 254 nm, retention time: t<sub>R</sub> = 9.3 min (minor), t<sub>R</sub> = 18.1 min (major).

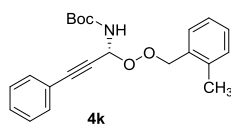

*tert*-butyl (*R*)-((2-methylbenzyl)peroxy)-3-phenylprop-2-yn-1-yl)carbamate **4k**

White solid, 95% yield, 35.0 mg,  $[\alpha]_{\text{D}}^{20} = +71.6$  (c 1.35 CHCl<sub>3</sub>).

**<sup>1</sup>H-NMR** (400 MHz, CDCl<sub>3</sub>):  $\delta$  (ppm): 7.45 (d, 2H,  $J = 7.2$  Hz), 7.32 (q, 4H,  $J = 7.2$  Hz,  $J = 6.8$  Hz), 7.23 (t, 1H,  $J = 6.0$  Hz,  $J = 7.2$  Hz), 7.16 (d, 2H,  $J = 4.4$  Hz), 6.31 (d, 1H,  $J = 8.4$  Hz), 5.67 (s, 1H), 5.17 (q, 2H,  $J = 10.4$  Hz,  $J = 10.4$  Hz), 2.40 (s, 3H), 1.46 (s, 9H).

**<sup>13</sup>C-NMR** (100 MHz, CDCl<sub>3</sub>):  $\delta$  (ppm): 153.80, 137.93, 132.94, 131.91, 130.77, 130.35, 129.10, 128.88, 128.37, 125.93, 121.54, 85.34, 83.08, 80.90, 75.88, 75.56, 28.25, 19.02.

**HRMS** calcd. for C<sub>22</sub>H<sub>25</sub>NO<sub>4</sub>Na [M+Na]<sup>+</sup>: 390.1676, found: 390.1675.

**HPLC analysis:** Daicel CHIRALCEL IC-3, *n*-hexane/*i*-PrOH = 85/15, flow rate = 1.0 mL/min,  $\lambda = 254$  nm, retention time:  $t_{\text{R}} = 8.6$  min (minor),  $t_{\text{R}} = 10.4$  min (major).

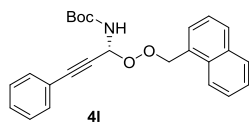

*tert*-butyl (*R*)-((naphthalen-1-ylmethyl)peroxy)-3-phenylprop-2-yn-1-yl)carbamate **4l**

White solid, 95% yield, 38.3 mg,  $[\alpha]_{\text{D}}^{20} = +59.4$  (c 1.65 CHCl<sub>3</sub>).

**<sup>1</sup>H-NMR** (400 MHz, CDCl<sub>3</sub>):  $\delta$  (ppm): 8.22 (d, 1H,  $J = 6.8$  Hz), 7.84 (d, 2H,  $J = 8.4$  Hz), 7.54 (d, 1H,  $J = 6.8$  Hz), 7.49-7.41 (m, 5H), 7.38-7.30 (m, 3H), 6.37 (d, 1H,  $J = 8.4$  Hz), 5.70 (s, 1H), 5.61 (dd, 2H,  $J = 10.4$  Hz,  $J = 10.8$  Hz), 1.44 (s, 9H).

**<sup>13</sup>C-NMR** (100 MHz, CDCl<sub>3</sub>):  $\delta$  (ppm): 153.79, 133.73, 132.26, 131.96, 130.66, 129.63, 129.14, 128.86, 128.53, 128.39, 126.57, 125.87, 125.26, 124.13, 121.49, 85.33, 83.22, 80.92, 75.87, 75.60, 28.23.

**HRMS** calcd. for C<sub>25</sub>H<sub>25</sub>NO<sub>4</sub>Na [M+Na]<sup>+</sup>: 402.1711, found: 402.1712.

**HPLC analysis:** Daicel CHIRALCEL IC-3, *n*-hexane/*i*-PrOH = 85/15, flow rate = 1.0 mL/min,  $\lambda = 254$  nm, retention time:  $t_{\text{R}} = 9.8$  min (minor),  $t_{\text{R}} = 18.8$  min (major).

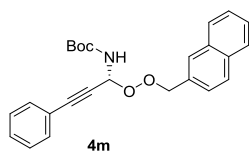

*tert*-butyl (*R*)-((naphthalen-2-ylmethyl)peroxy)-3-phenylprop-2-yn-1-yl)carbamate **4m**

White solid, 95% yield, 38.3 mg,  $[\alpha]_{\text{D}}^{20} = +57.3$  (c 1.75 CHCl<sub>3</sub>).

**<sup>1</sup>H-NMR** (400 MHz, CDCl<sub>3</sub>): δ (ppm): 7.81 (q, 4H, *J* = 8.0 Hz, *J* = 6.8 Hz), 7.53 (d, 1H, *J* = 8.4 Hz), 7.49-7.43 (m, 4H), 7.37-7.29 (m, 3H), 6.35 (d, 1H, *J* = 8.8 Hz), 5.67 (s, 1H), 5.29 (s, 2H), 1.45 (s, 9H).

**<sup>13</sup>C-NMR** (100 MHz, CDCl<sub>3</sub>): δ (ppm): 153.85, 133.37, 133.24, 132.83, 131.94, 129.14, 128.52, 128.39, 128.22, 128.07, 127.72, 126.78, 126.26, 126.15, 121.49, 85.52, 82.88, 80.90, 77.94, 75.59, 28.24.

**HRMS** calcd. for C<sub>25</sub>H<sub>25</sub>NO<sub>4</sub>Na [M+Na]<sup>+</sup>: 402.1711, found: 402.1708.

**HPLC analysis:** Daicel CHIRALCEL IC-3, *n*-hexane/*i*-PrOH = 85/15, flow rate = 1.0 mL/min, λ = 254 nm, retention time: t<sub>R</sub> = 9.0 min (minor), t<sub>R</sub> = 17.2 min (major).

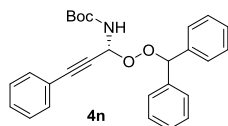

*tert*-butyl (*R*)-(1-(benzhydrylperoxy)-3-phenylprop-2-yn-1-yl)carbamate **4n**

White solid, 80% yield, 34.4 mg, [α]<sub>D</sub><sup>20</sup> = +38.1 (c 1.90 CHCl<sub>3</sub>).

**<sup>1</sup>H-NMR** (400 MHz, CDCl<sub>3</sub>): δ (ppm): 7.44 (dd, 2H, *J* = 7.6 Hz, *J* = 7.6 Hz), 7.41 (d, 2H, *J* = 6.8 Hz), 7.37-7.28 (m, 11H), 6.36 (d, 1H, *J* = 9.2 Hz), 6.30 (s, 1H), 5.68 (d, 1H, *J* = 7.6 Hz), 1.46 (s, 9H).

**<sup>13</sup>C-NMR** (100 MHz, CDCl<sub>3</sub>): δ (ppm): 153.79, 139.32, 139.13, 131.92, 129.11, 128.39, 128.36, 128.35, 128.14, 128.01, 127.99, 127.75, 121.57, 88.11, 85.51, 83.17, 80.87, 75.76, 28.25.

**HRMS** calcd. for C<sub>27</sub>H<sub>27</sub>NO<sub>4</sub>Na [M+Na]<sup>+</sup>: 452.1832, found: 452.1831.

**HPLC analysis:** Daicel CHIRALCEL IC-3, *n*-hexane/*i*-PrOH = 85/15, flow rate = 1.0 mL/min, λ = 254 nm, retention time: t<sub>R</sub> = 5.6 min (major), t<sub>R</sub> = 10.4 min (minor).

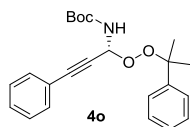

*tert*-butyl (*R*)-(3-phenyl-1-((2-phenylpropan-2-yl)peroxy)prop-2-yn-1-yl)carbamate **4o**

White solid, 83% yield, 31.6 mg, [α]<sub>D</sub><sup>20</sup> = +73.5 (c 1.80 CHCl<sub>3</sub>).

**<sup>1</sup>H-NMR** (600 MHz, CDCl<sub>3</sub>): δ (ppm): 7.51 (d, 2H, *J* = 7.8 Hz), 7.44 (d, 2H, *J* = 6.6 Hz), 7.43-7.30 (m, 4H), 7.26 (d, 1H, *J* = 8.4 Hz), 6.27 (d, 1H, *J* = 8.4 Hz), 5.57 (s, 1H), 1.65 (d, 6H, *J* = 7.8 Hz), 1.49 (s, 9H).

<sup>13</sup>C-NMR (150 MHz, CDCl<sub>3</sub>): δ (ppm): 153.99, 144.96, 131.90, 128.99, 128.33, 128.08, 127.20, 125.57, 121.69, 85.31, 83.75, 83.06, 80.62, 75.56, 28.27, 26.58.

HRMS calcd.for C<sub>23</sub>H<sub>27</sub>NO<sub>4</sub>Na [M+Na]<sup>+</sup>: 404.1832, found: 404.1829.

HPLC analysis: Daicel CHIRALCEL IC-3, *n*-hexane/*i*-PrOH = 85/15, flow rate = 1.0 mL/min, λ = 254 nm, retention time: t<sub>R</sub> = 10.0min (major), t<sub>R</sub> = 13.2 min (minor).

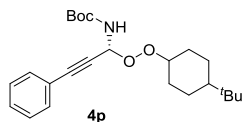

*tert*-butyl (R)-((4-(*tert*-butyl)cyclohexyl)peroxy)-3-phenylprop-2-yn-1-yl)carbamate **4p**

White solid, 81% yield, 32.5 mg, [α]<sub>D</sub><sup>20</sup> = +92.7 (c 0.60 CHCl<sub>3</sub>).

<sup>1</sup>H-NMR (400 MHz, CDCl<sub>3</sub>): δ (ppm): 7.46 (d, 2H, *J* = 6.4 Hz), 7.37-7.30 (m, 3H), 6.55 (d, 1H, *J* = 10.8 Hz), 5.71 (d, 1H, *J* = 10.4 Hz), 2.37-2.32 (m, 2H), 1.68 (q, 2H, *J* = 10.4 Hz, *J* = 10.8 Hz), 1.57 (dd, 1H, *J* = 4.0 Hz, *J* = 4.4 Hz), 1.49 (s, 9H), 1.35-1.25 (m, 3H), 1.08-1.02 (m, 1H), 0.87 (s, 9H).

<sup>13</sup>C-NMR (100 MHz, CDCl<sub>3</sub>): δ (ppm): 155.99, 132.02, 129.42, 128.40, 120.98, 87.08, 82.21, 82.16, 81.08, 76.95, 47.49, 32.34, 29.78, 28.18, 27.66, 23.62, 22.98.

HRMS calcd.for C<sub>24</sub>H<sub>35</sub>NO<sub>4</sub>Na [M+Na]<sup>+</sup>: 424.2458, found: 424.2462.

HPLC analysis: Daicel CHIRALCEL AD-3, *n*-hexane/*i*-PrOH = 85/15, flow rate = 1.0 mL/min, λ = 254 nm, retention time: t<sub>R</sub> = 5.8 min (major), t<sub>R</sub> = 11.8 min (minor).

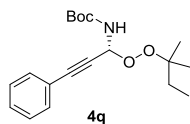

*tert*-butyl (R)-((*tert*-pentyl)peroxy)-3-phenylprop-2-yn-1-yl)carbamate **4q**

White solid, 82% yield, 27.3 mg, [α]<sub>D</sub><sup>20</sup> = +98.8 (c 0.64 CHCl<sub>3</sub>).

<sup>1</sup>H-NMR (400 MHz, CDCl<sub>3</sub>): δ (ppm): 7.45 (dd, 2H, *J* = 7.2 Hz, *J* = 8.0 Hz), 7.37-7.29 (m, 3H), 6.23 (d, 1H, *J* = 9.6 Hz), 5.59 (d, 1H, 7.6 Hz), 1.60 (q, 2H, *J* = 7.6 Hz, *J* = 7.6 Hz), 1.48 (s, 9H), 1.24 (s, 9H), 0.91 (t, 3H, *J* = 7.6 Hz, *J* = 7.6 Hz).

<sup>13</sup>C-NMR (100 MHz, CDCl<sub>3</sub>): δ (ppm): 153.98, 131.90, 128.94, 128.30, 121.74, 85.12, 83.33, 83.21, 80.55, 75.41, 31.73, 28.25, 23.91, 8.39.

HRMS calcd.for C<sub>19</sub>H<sub>27</sub>NO<sub>4</sub>Na [M+Na]<sup>+</sup>: 356.1832, found: 356.1838.

HPLC analysis: Daicel CHIRALCEL IC-3, *n*-hexane/*i*-PrOH = 85/15, flow rate = 1.0 mL/min, λ = 254 nm, retention time: t<sub>R</sub> = 4.4 min (minor), t<sub>R</sub> = 6.8 min (major).



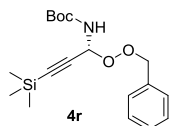

*tert*-butyl (*R*)-(1-(benzylperoxy)-3-(trimethylsilyl)prop-2-yn-1-yl)carbamate **4r**

Colorless oil, 87% yield, 30.5 mg,  $[\alpha]_{\text{D}}^{20} = +183.5$  (c 0.40 CHCl<sub>3</sub>).

<sup>1</sup>H-NMR (400 MHz, CDCl<sub>3</sub>):  $\delta$  (ppm): 7.40-7.37 (m, 2H), 7.36-7.31 (m, 3H), 6.07 (d, 1H, *J* = 8.8 Hz), 5.55 (d, 1H, *J* = 6.0 Hz), 5.09 (q, 2H, *J* = 10.8 Hz, *J* = 10.4 Hz), 1.44 (s, 9H), 0.20 (s, 9H).

<sup>13</sup>C-NMR (100 MHz, CDCl<sub>3</sub>):  $\delta$  (ppm): 154.19, 135.58, 129.64, 128.91, 128.82, 98.95, 91.94, 81.26, 78.13, 75.51, 28.63, 0.00.

HRMS calcd. for C<sub>18</sub>H<sub>27</sub>NO<sub>4</sub>SiNa [M+Na]<sup>+</sup>: 372.1602, found: 372.1608.

HPLC analysis: Daicel CHIRALCEL IC-3, *n*-hexane/*i*-PrOH = 90/10, flow rate = 1.0 mL/min,  $\lambda = 220$  nm, retention time: *t*<sub>R</sub> = 6.1 min (minor), *t*<sub>R</sub> = 7.6 min (major).

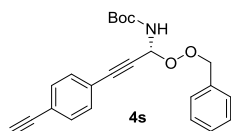

*tert*-butyl (*R*)-(1-(benzylperoxy)-3-(4-ethynylphenyl)prop-2-yn-1-yl)carbamate **4s**

White solid, 82% yield, 31.0 mg,  $[\alpha]_{\text{D}}^{20} = +155.3$  (c 1.35 CHCl<sub>3</sub>).

<sup>1</sup>H-NMR (400 MHz, CDCl<sub>3</sub>):  $\delta$  (ppm): 7.45 (d, 2H, *J* = 8.4 Hz), 7.41-7.39 (m, 4H), 7.38-7.32 (m, 3H), 6.32 (d, 1H, *J* = 12.0 Hz), 5.67 (d, 1H, *J* = 6.4 Hz), 5.13 (s, 2H), 3.19 (s, 1H), 1.47 (s, 9H).

<sup>13</sup>C-NMR (100 MHz, CDCl<sub>3</sub>):  $\delta$  (ppm): 153.80, 135.20, 132.08, 131.78, 129.23, 128.55, 128.47, 122.92, 121.88, 84.75, 82.95, 81.00, 79.37, 77.86, 75.47, 28.24.

HRMS calcd. for C<sub>23</sub>H<sub>23</sub>NO<sub>4</sub>Na [M+Na]<sup>+</sup>: 400.1519, found: 400.1516.

HPLC analysis: Daicel CHIRALCEL IC-3, *n*-hexane/*i*-PrOH = 85/15, flow rate = 1.0 mL/min,  $\lambda = 254$  nm, retention time: *t*<sub>R</sub> = 9.0 min (minor), *t*<sub>R</sub> = 13.5 min (major).

### Catalytic asymmetric synthesis of chiral *C*-aryl $\alpha$ -amino peroxides **6**

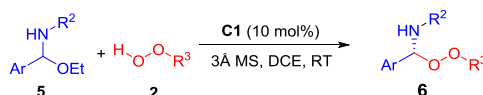

To a solution of **5** (0.1 mmol) and **2** (0.2 mmol) in DCE (1.0 mL) was added the catalyst **C1** (10 mol %) and 3Å MS (100 mg) at room temperature. After *C*-aryl-*N*-Boc-*N,O*-acetal **5** was consumed, the mixture was directly purified by silica gel chromatography (ethyl acetate/petroleum

ether = 1/40 to 1/20) to afford the product **6** (the racemic product **6** was obtained by using 1,1'-binaphthyl-2,2'-diyl hydrogenphosphate as the catalyst).

### Characterization data of the products **6**

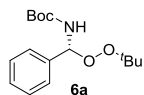

*tert*-butyl (*R*)-((*tert*-butylperoxy)(phenyl)methyl)carbamate **6a**

White solid, 90% yield, 26.6 mg,  $[\alpha]_D^{20} = +17.8$  (c 0.90 CHCl<sub>3</sub>).

<sup>1</sup>H-NMR (600 MHz, CDCl<sub>3</sub>):  $\delta$  (ppm): 7.36 (d, 2H,  $J = 7.2$  Hz), 7.31-7.19 (m, 3H), 6.34 (d, 1H,  $J = 9.6$  Hz), 5.24 (d, 1H,  $J = 7.8$  Hz), 1.41 (s, 9H), 1.22 (s, 9H).

<sup>13</sup>C-NMR (150 MHz, CDCl<sub>3</sub>):  $\delta$  (ppm): 154.98, 136.78, 128.79, 128.53, 126.49, 85.51, 80.90, 80.06, 28.31, 26.42.

HRMS calcd. for C<sub>16</sub>H<sub>25</sub>NO<sub>4</sub>Na [M+Na]<sup>+</sup>: 318.1676, found: 318.1680.

HPLC analysis: Daicel CHIRALCEL ID-3, *n*-hexane/*i*-PrOH = 95/5, flow rate = 1.0 mL/min,  $\lambda = 215$  nm, retention time:  $t_R = 8.1$  min (minor),  $t_R = 10.3$  min (major).

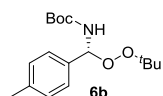

*tert*-butyl (*R*)-((*tert*-butylperoxy)(*p*-tolyl)methyl)carbamate **6b**

White solid, 92% yield, 28.5 mg,  $[\alpha]_D^{20} = +39.3$  (c 0.96 CHCl<sub>3</sub>).

<sup>1</sup>H-NMR (600 MHz, CDCl<sub>3</sub>):  $\delta$  (ppm): 7.31 (d, 2H,  $J = 7.8$  Hz), 7.17 (d, 2H,  $J = 7.8$  Hz), 6.38 (d, 1H,  $J = 9.6$  Hz), 5.29 (d, 1H,  $J = 7.2$  Hz), 2.35 (s, 3H), 1.48 (s, 9H), 1.29 (s, 9H).

<sup>13</sup>C-NMR (150 MHz, CDCl<sub>3</sub>):  $\delta$  (ppm): 154.98, 138.66, 133.77, 129.19, 126.39, 125.81, 85.47, 80.82, 79.94, 28.30, 26.41, 21.20.

HRMS calcd. for C<sub>17</sub>H<sub>27</sub>NO<sub>4</sub>Na [M+Na]<sup>+</sup>: 332.1832, found: 332.1829.

HPLC analysis: Daicel CHIRALCEL ID-3, *n*-hexane/*i*-PrOH = 95/5, flow rate = 1.0 mL/min,  $\lambda = 220$  nm, retention time:  $t_R = 5.4$  min (major),  $t_R = 6.4$  min (minor).

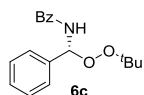

(*R*)-*N*-((*tert*-butylperoxy)(phenyl)methyl)benzamide **6c**

White solid, 94% yield, 28.2 mg,  $[\alpha]_D^{20} = +28.2$  (c 0.20 CHCl<sub>3</sub>).

<sup>1</sup>H-NMR (600 MHz, CDCl<sub>3</sub>):  $\delta$  (ppm): 7.85 (d, 2H,  $J = 7.2$  Hz), 7.53-7.49 (m, 3H), 7.50-7.43 (m,

2H), 7.41-7.35 (m, 3H), 6.91 (d, 1H,  $J = 9.0$  Hz), 6.86 (d, 1H,  $J = 9.0$  Hz), 1.30 (s, 9H).

$^{13}\text{C-NMR}$  (150 MHz,  $\text{CDCl}_3$ ):  $\delta$  (ppm): 166.96, 136.87, 134.01, 131.93, 128.97, 128.68, 127.18, 126.53, 84.37, 81.31, 26.47.

**HRMS** calcd. for  $\text{C}_{18}\text{H}_{21}\text{NO}_3\text{Na}$  [ $\text{M}+\text{Na}$ ] $^+$ : 322.1414, found: 322.1417.

**HPLC analysis:** Daicel CHIRALCEL ID-3,  $n$ -hexane/ $i$ -PrOH = 95/5, flow rate = 1.0 mL/min,  $\lambda = 230$  nm, retention time:  $t_{\text{R}} = 13.0$  min (minor),  $t_{\text{R}} = 18.4$  min (major).

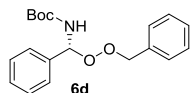

*tert*-butyl (*R*)-((benzylperoxy)(phenyl)methyl)carbamate **6d**

White solid, 91% yield, 30.0 mg,  $[\alpha]_{\text{D}}^{20} = +42.9$  (c 0.57  $\text{CHCl}_3$ ).

$^1\text{H-NMR}$  (600 MHz,  $\text{CDCl}_3$ ):  $\delta$  (ppm): 7.38-7.32 (m, 10H), 6.50 (d, 1H,  $J = 9.6$  Hz), 5.33 (d, 1H,  $J = 7.8$  Hz), 5.06 (q, 2H,  $J = 11.4$  Hz,  $J = 11.4$  Hz), 1.48 (s, 9H).

$^{13}\text{C-NMR}$  (150 MHz,  $\text{CDCl}_3$ ):  $\delta$  (ppm): 154.76, 136.33, 125.67, 129.22, 128.97, 128.59, 128.39, 126.51, 125.94, 85.13, 81.96, 80.39, 63.54, 28.31.

**HRMS** calcd. for  $\text{C}_{19}\text{H}_{23}\text{NO}_4\text{Na}$  [ $\text{M}+\text{Na}$ ] $^+$ : 352.1519, found: 352.1517.

**HPLC analysis:** Daicel CHIRALCEL ID-3,  $n$ -hexane/ $i$ -PrOH = 80/20, flow rate = 1.0 mL/min,  $\lambda = 220$  nm, retention time:  $t_{\text{R}} = 14.3$  min (major),  $t_{\text{R}} = 15.8$  min (minor).

### Large-Scale catalytic asymmetric reactions

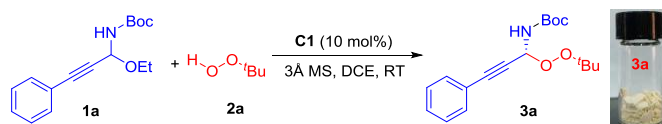

To a solution of **1a** (4.0 mmol) and **2a** (8.0 mmol) in DCE (40.0 mL) was added the catalyst **C1** (10 mol %) and 3Å MS (4g) at room temperature. After *C*-alkynyl-*N*-Boc-*N,O*-acetal **1a** was consumed, the mixture was directly purified by silica gel chromatography (ethyl acetate/petroleum ether = 1/40 to 1/20) to afford the product **3a** (1.19 g, 94% yield and 90% ee)

### General procedure for synthesis and characterization data of the products **7**

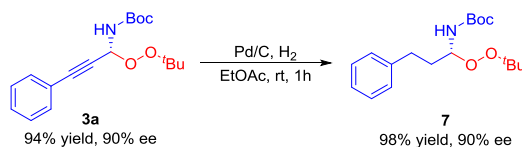

An oven-dried 10 mL Schlenk tube equipped with a stirring bar and capped with a rubber septum

was charged with Pd/C (0.01 mmol Pd). The tube was degassed and backfilled with hydrogen gas (3 times). Under a positive hydrogen pressure (hydrogen-filled balloon), degassed EtOAc (1mL) was added into the tube via a syringe, followed by the addition of **3a** (32 mg, 0.1 mmol). The reaction mixture was stirred at room temperature under a hydrogen atmosphere (hydrogen-filled balloon). Upon completion of the reaction in 1 h (monitored by TLC), the reaction mixture was filtered with a pad of celite to remove Linder catalyst, and the filtrate was concentrated in vacuo. The organic layer was further purified by flash column chromatography on silica gel to give **7**.

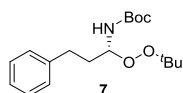

*tert*-butyl (*R*)-(1-(*tert*-butylperoxy)-3-phenylpropyl)carbamate **7**

White solid, 98% yield, 31.7 mg,  $[\alpha]_D^{20} = +48.6$  (c 1.50 CHCl<sub>3</sub>).

**<sup>1</sup>H-NMR** (400 MHz, CDCl<sub>3</sub>):  $\delta$  (ppm): 7.28 (d, 2H,  $J = 7.2$  Hz), 7.19 (d, 3H,  $J = 6.0$  Hz), 5.39 (d, 1H,  $J = 7.6$  Hz), 5.03 (d, 1H,  $J = 9.2$  Hz), 2.73 (t, 2H,  $J = 7.6$  Hz,  $J = 7.2$  Hz), 2.03 (q, 1H,  $J = 6.8$  Hz,  $J = 6.8$  Hz), 1.85-1.79 (m, 1H), 1.46 (s, 9H), 1.24 (s, 9H).

**<sup>13</sup>C-NMR** (100 MHz, CDCl<sub>3</sub>):  $\delta$  (ppm): 155.14, 141.13, 128.45, 128.39, 126.04, 84.44, 80.29, 79.71, 34.22, 31.37, 28.30, 26.38.

**HRMS** calcd. for C<sub>18</sub>H<sub>29</sub>NO<sub>4</sub>Na [M+Na]<sup>+</sup>: 346.1989, found: 346.1992.

**HPLC analysis:** Daicel CHIRALCEL IC-3, *n*-hexane/*i*-PrOH = 90/10, flow rate = 1.0 mL/min,  $\lambda = 218$  nm, retention time:  $t_R = 4.3$  min (minor),  $t_R = 5.3$  min (major).

## The experiments of non-linear effect and product ee dependence on time

### (1) non-linear effect (NLE)

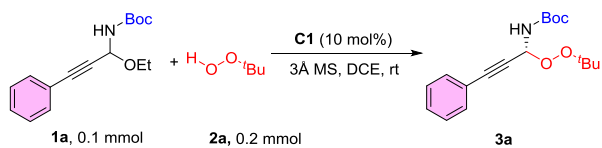

| entry | ee of C1% | ee of 3a% |
|-------|-----------|-----------|
| 1     | 99        | 92        |
| 2     | 80        | 60        |
| 3     | 60        | 33        |
| 4     | 40        | 19        |
| 5     | 20        | 9         |
| 6     | 0         | 0         |

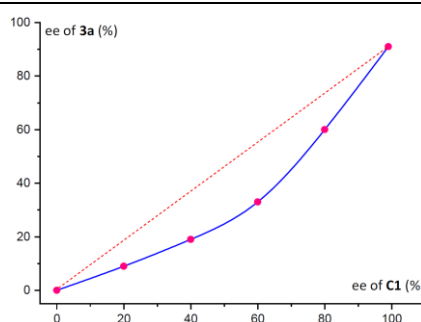

### (2) product ee dependence on time

The enantiopurity of the product was kept with reaction time, indicating the reaction isn't a progress of simple kinetic resolution.

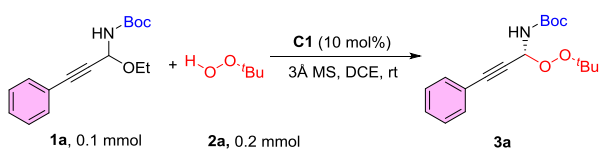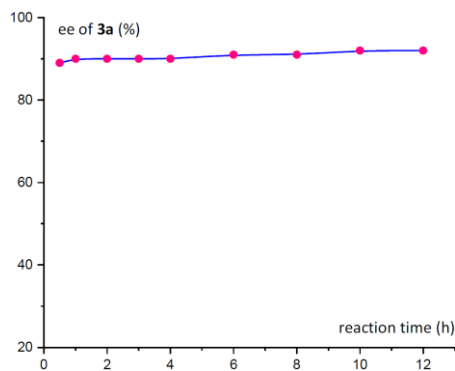

## Proposed transition states for the asymmetric peroxidation of C-alkynyl imines.

A plausible transition state model was proposed on the basis of the absolute configuration of the product, the control experiments and the previous works of the chiral calcium phosphate catalysts<sup>4</sup> (Figure 1), demonstrating to account for the chemistry and stereochemistry of the reaction. The chiral calcium phosphate as a bifunctional catalyst is able to simultaneously activate both C-alkynyl imine *in situ* generated and hydroperoxide by multiple hydrogen bonds. Subsequently, the interaction could provide an enantioselective environment to urge to hydroperoxide attack the *Si* face of carbon-nitrogen double bond in C-alkynyl imine, forming the product with high enantioselectivity.

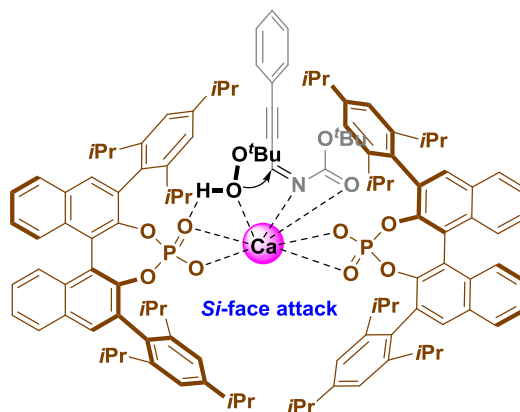

Figure 1. Plausible transition state model

## Determination of the Product Stereochemistry

The absolute stereochemistry of the C-alkynyl **4** were based on single crystal X-ray crystallography of **4c**. The X-ray data have been deposited at the Cambridge Crystallographic Data Center (CCDC 2120219). The stereochemistry of other products was assumed by analogy. And the absolute configurations of **6** was confirmed by comparing of the optical rotation of **6c** with literature value.

### (i) X-ray crystallography.

The proper chiral single crystal was obtained by slow evaporation of a <sup>i</sup>PrOH solution of **4c** at room temperature.

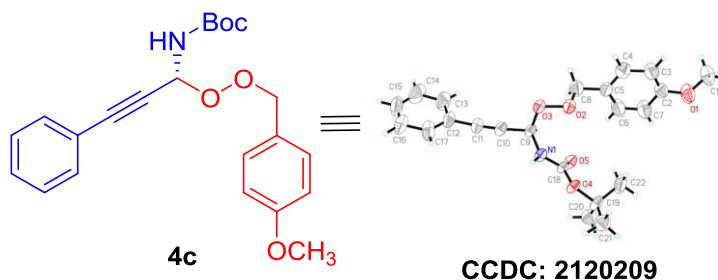

|                                   |                                                  |                       |
|-----------------------------------|--------------------------------------------------|-----------------------|
| Identification code               | 2                                                |                       |
| Empirical formula                 | C <sub>22</sub> H <sub>25</sub> N O <sub>5</sub> |                       |
| Formula weight                    | 383.43                                           |                       |
| Temperature                       | 298(2) K                                         |                       |
| Wavelength                        | 1.54178 Å                                        |                       |
| Crystal system, space group       | Monoclinic, P2(1)                                |                       |
| Unit cell dimensions              | a = 9.7745(14) Å                                 | alpha = 90 deg.       |
|                                   | b = 9.5549(14) Å                                 | beta = 91.267(9) deg. |
|                                   | c = 11.5736(17) Å                                | gamma = 90 deg.       |
| Volume                            | 1080.6(3) Å <sup>3</sup>                         |                       |
| Z, Calculated density             | 2, 1.178 Mg/m <sup>3</sup>                       |                       |
| Absorption coefficient            | 0.682 mm <sup>-1</sup>                           |                       |
| F(000)                            | 408                                              |                       |
| Crystal size                      | 0.220 x 0.180 x 0.160 mm                         |                       |
| Theta range for data collection   | 3.820 to 65.403 deg.                             |                       |
| Limiting indices                  | -11 ≤ h ≤ 9, -11 ≤ k ≤ 11, -13 ≤ l ≤ 13          |                       |
| Reflections collected / unique    | 9944 / 3553 [R(int) = 0.0909]                    |                       |
| Completeness to theta = 65.403    | 97.5 %                                           |                       |
| Absorption correction             | Semi-empirical from equivalents                  |                       |
| Max. and min. transmission        | 0.897 and 0.863                                  |                       |
| Refinement method                 | Full-matrix least-squares on F <sup>2</sup>      |                       |
| Data / restraints / parameters    | 3553 / 21 / 258                                  |                       |
| Goodness-of-fit on F <sup>2</sup> | 1.099                                            |                       |
| Final R indices [I > 2σ(I)]       | R1 = 0.0811, wR2 = 0.2370                        |                       |
| R indices (all data)              | R1 = 0.1146, wR2 = 0.2647                        |                       |
| Absolute structure parameter      | -0.03(17)                                        |                       |
| Extinction coefficient            | 0.040(12)                                        |                       |
| Largest diff. peak and hole       | 0.422 and -0.270 e.Å <sup>-3</sup>               |                       |

**(ii) Comparison of the optical rotation value with the literature data.**

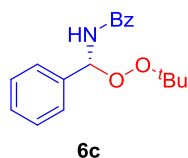

The literature optical rotation value for (*R*)-**6c** in 86% ee was reported to be  $[\alpha]_D^{20} = +32.9$  ( $c = 1.43$ , CHCl<sub>3</sub>).<sup>3</sup> The measured value of our product in 95% ee was  $[\alpha]_D^{20} = +28.2$  ( $c = 0.20$ , CHCl<sub>3</sub>).

Thus, the absolute configuration of our product was assigned to be *R*.

## References

- [1] Y.-C. Wang, M.-J. Mo, K.-X. Zhu, C. Zheng, H.-B. Zhang, W. Wang and Z.-H. Shao, *Nat. Commun.* 2015, **6**, 8544.
- [2] (a) Y.-X. Hou, J.-J. Hu, R.-G. Xu, S.-L. Pan, X.-F. Zeng and G.-F. Zhong, *Org. Lett.* **2019**, *21*, 4428. (b) T. G. Driver, J. R. Hason and K. S. Woerpel, *J. Am. Chem. Soc.* **2007**, *129*, 3836.
- [3] W. H. Zheng, L. Wojtas and J. C. Antilla, *Angew. Chem. Int. Ed.* **2010**, *49*, 6589.
- [4] (a) L. Simón and R. S. Paton, *J. Am. Chem. Soc.*, **2018**, *140*, 5412; (b) X.-T. Fang, Z.-H. Deng, W.-H. Zheng and J. C. Antilla, *ACS Catal.*, **2019**, *9*, 1748; (c) R. Cao and J. C. Antilla, *Org. Lett.*, **2020**, *22*, 5958; (d) R.-H. Liu, S. Krishnamurthy, Z.-W. Wu, K. S. S. Tummalapalli and J. C. Antilla, *Org. Lett.*, **2020**, *22*, 8101.



# Copies of NMR and HPLC

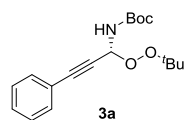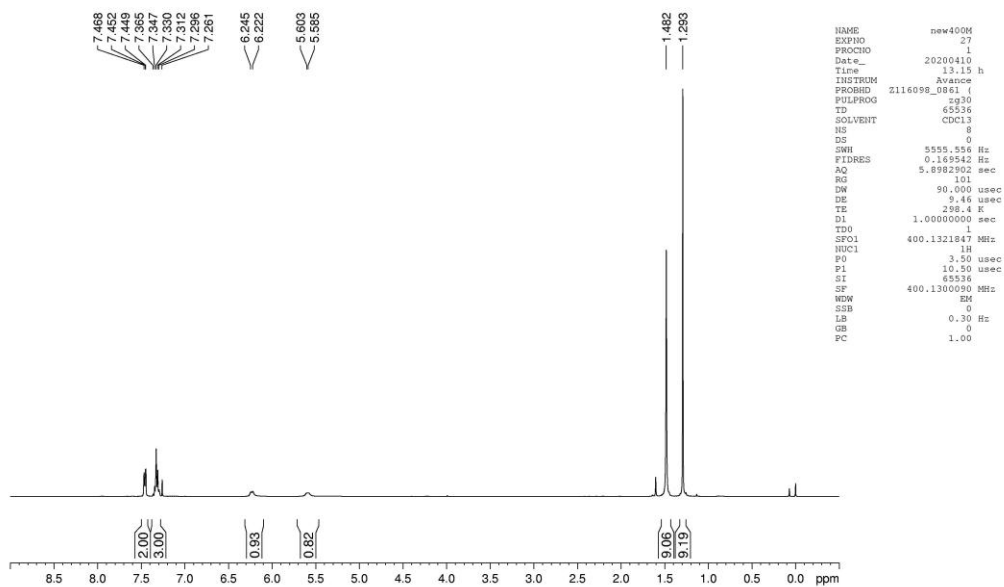

```

NAME          new400M
EXPNO         27
PROCNO        1
Date_         20200410
Time          13.15 h
INSTRUM       Avance
PROBHD        Z116098_0861 (
PULPROG       zg30
TD            65536
SOLVENT       CDCl3
NS            8
DS            0
SWH           5555.556 Hz
FIDRES        0.169542 Hz
AQ            5.8982902 sec
RG            101
DW            90.000 usec
DE            9.46 usec
TE            298.4 K
D1            1.00000000 sec
TDO           1
SF01          400.1321847 MHz
NUC1          1H
P0            3.50 usec
P1            10.50 usec
SI            65536
SF            400.1300090 MHz
WDW           EM
SSB           0
LB            0.30 Hz
GB            0
PC            1.00
    
```

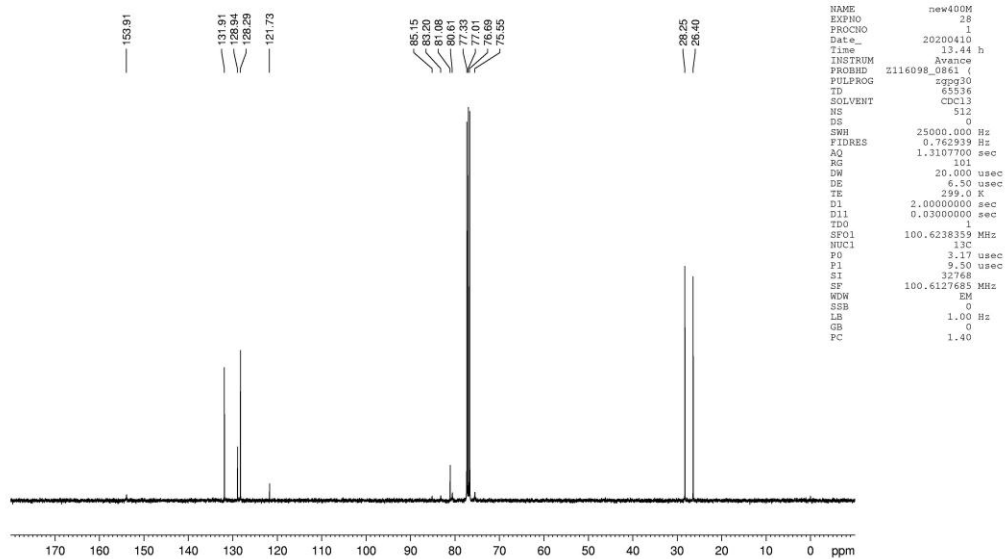

```

NAME          new400M
EXPNO         28
PROCNO        1
Date_         20200410
Time          13.44 h
INSTRUM       Avance
PROBHD        Z116098_0861 (
PULPROG       zgpg30
TD            65536
SOLVENT       CDCl3
NS            512
DS            0
SWH           25000.000 Hz
FIDRES        0.762939 Hz
AQ            1.3107700 sec
RG            101
DW            20.000 usec
DE            6.50 usec
TE            299.0 K
D1            2.00000000 sec
D11           0.03000000 sec
TDO           1
SF01          100.6238359 MHz
NUC1          13C
P0            3.17 usec
P1            9.50 usec
SI            32768
SF            100.6127685 MHz
WDW           EM
SSB           0
LB            1.00 Hz
GB            0
PC            1.40
    
```

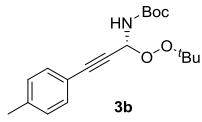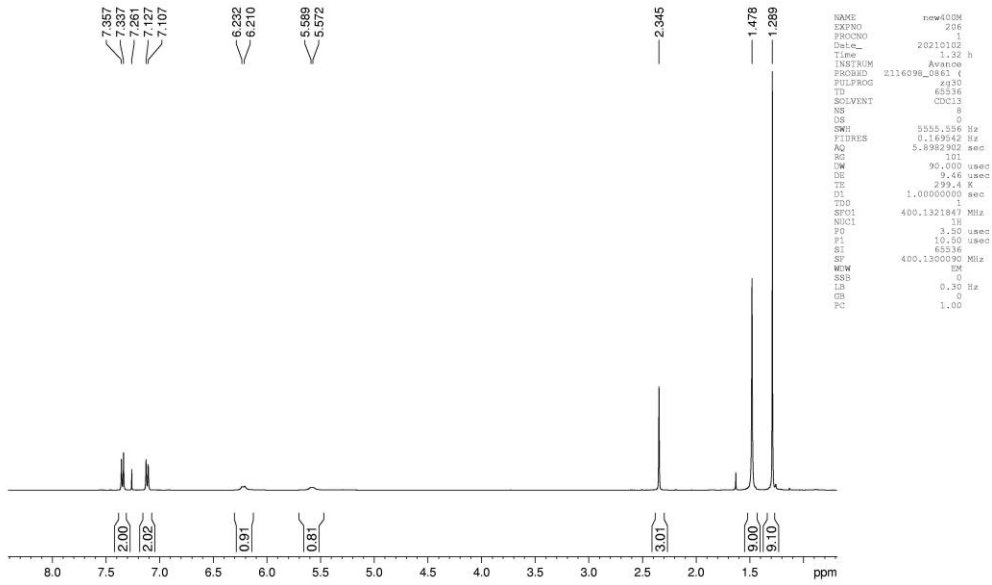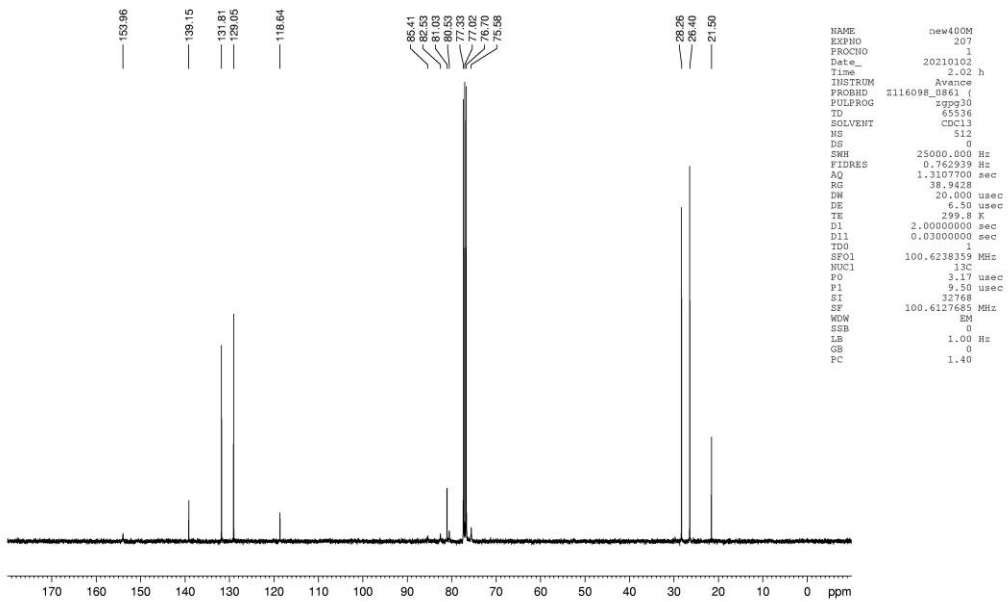

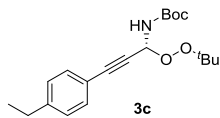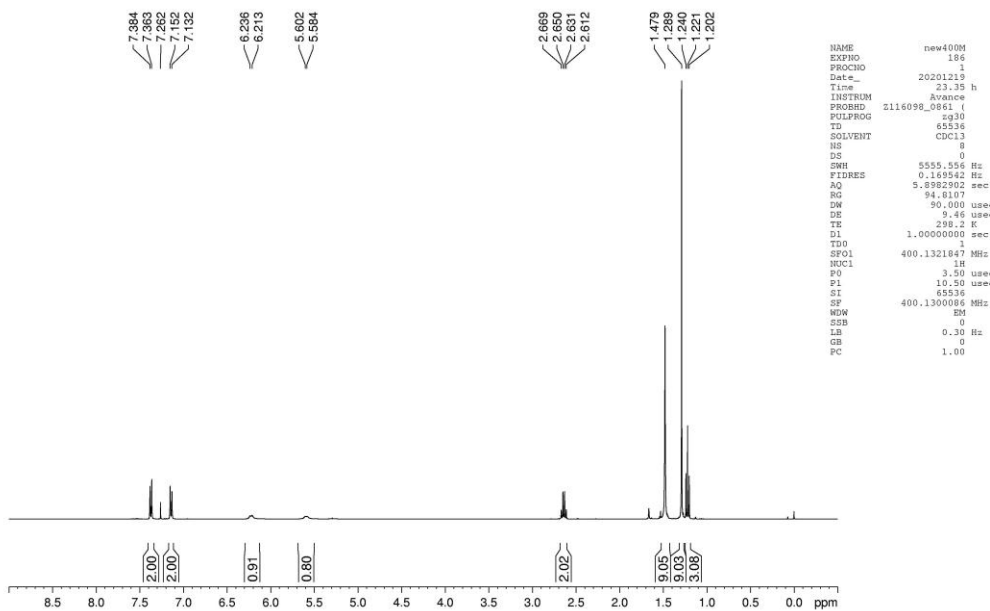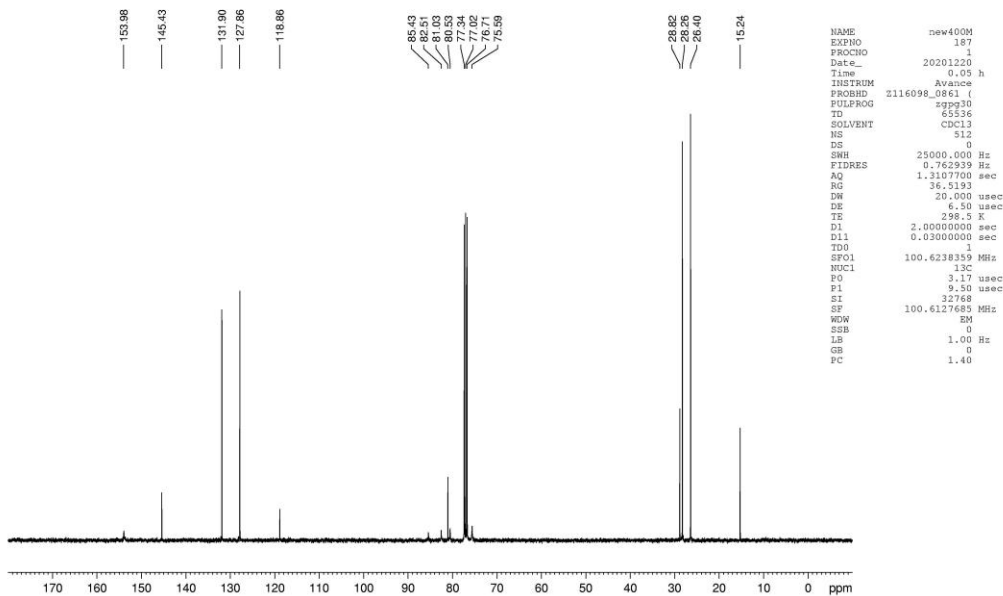

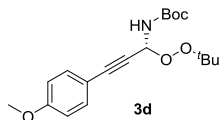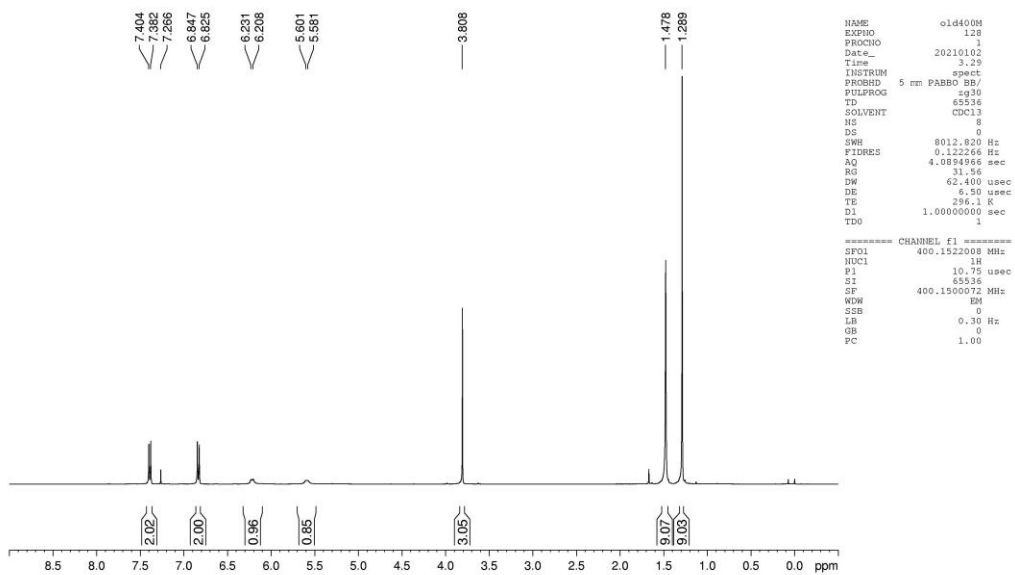

```

NAME      old400M
EXPNO     128
PROCNO    1
Date_     20210102
Time      3.29
INSTRUM   spect
PROBHD    5 mm PABBO BB/
PULPROG   zg30
TD         65536
SOLVENT   CDCl3
NS         8
DS         0
SWH        8012.820 Hz
FIDRES     0.122266 Hz
AQ         4.089496 sec
RG         31.56
DW         62.400 usec
DE         6.50 usec
TE         296.1 K
D1         1.0000000 sec
TDO        1

===== CHANNEL f1 =====
SF01      400.1522008 MHz
NUC1       1H
P1         10.75 usec
SI         65536
SF         400.1500072 MHz
WDW        EM
SSB        0
LB         0.30 Hz
GB         0
PC         1.00
  
```

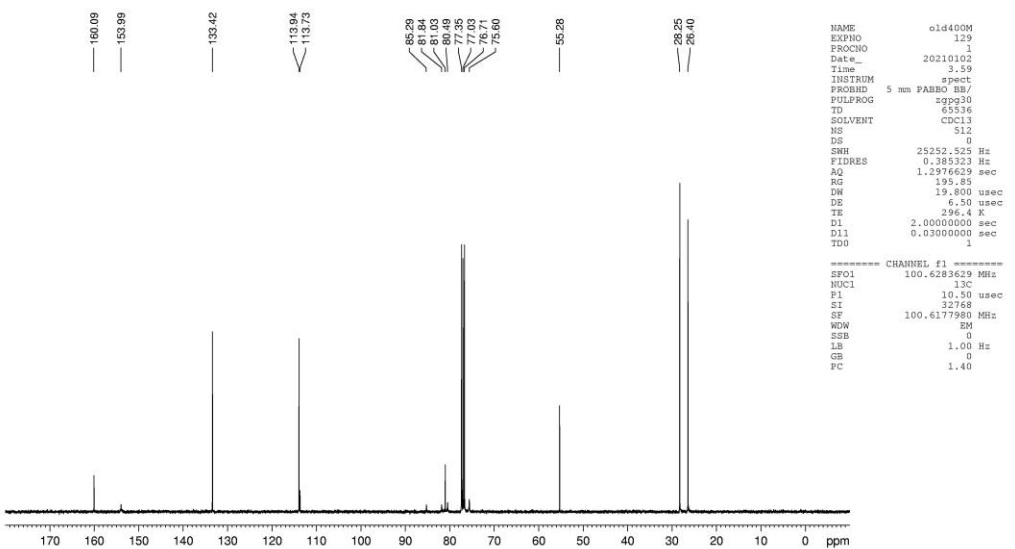

```

NAME      old400M
EXPNO     129
PROCNO    1
Date_     20210102
Time      3.59
INSTRUM   spect
PROBHD    5 mm PABBO BB/
PULPROG   zgpg30
TD         65536
SOLVENT   CDCl3
NS         512
DS         0
SWH        25252.525 Hz
FIDRES     0.38523 Hz
AQ         1.2976629 sec
RG         195.85
DW         19.800 usec
DE         6.50 usec
TE         296.4 K
D1         2.0000000 sec
D11        0.0300000 sec
TDO        1

===== CHANNEL f1 =====
SF01      100.6283629 MHz
NUC1       13C
P1         10.50 usec
SI         22768
SF         100.6177980 MHz
WDW        EM
SSB        0
LB         1.00 Hz
GB         0
PC         1.40
  
```

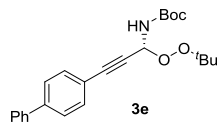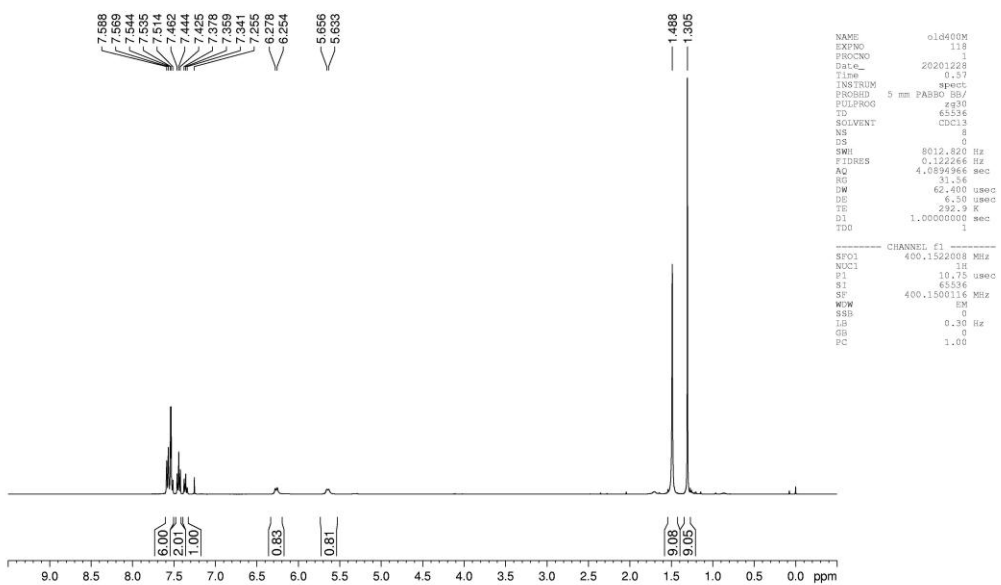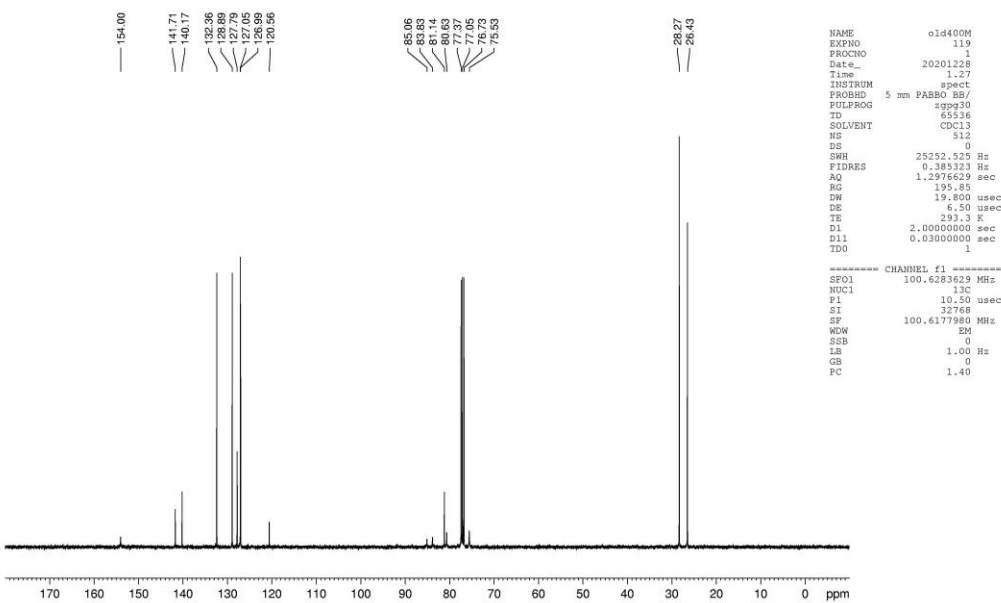

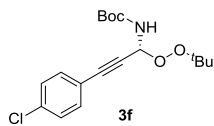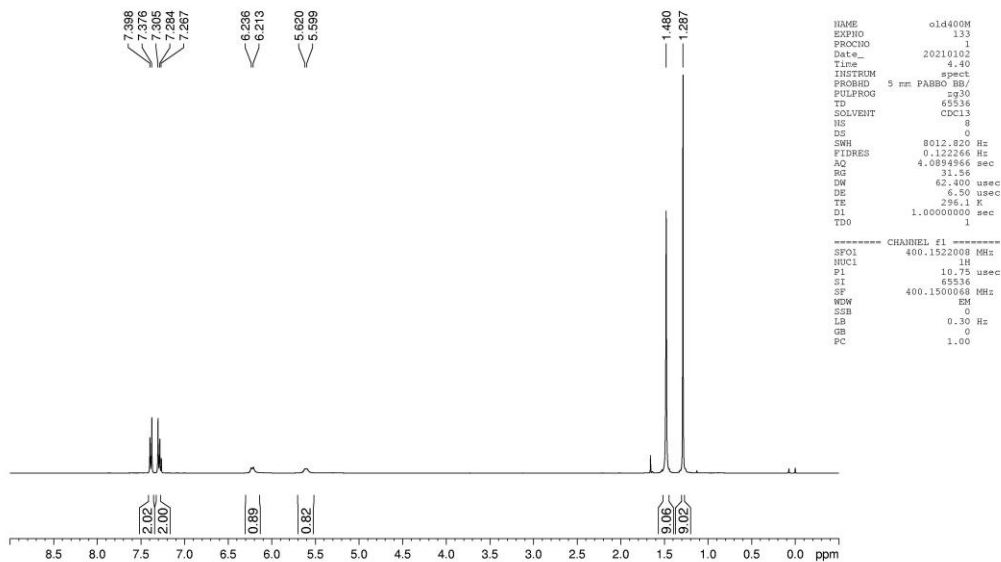

```

NAME          o1d400M
EXPNO         133
PROCNO        1
Date_         20210102
Time          4.40
INSTRUM       spect
PROBHD        5 mm PABBO BB/
PULPROG       zg30
TD            65536
SOLVENT       CDCl3
NS            8
DS            0
SWH           8012.820 Hz
FIDRES       0.122266 Hz
AQ           4.0934956 sec
RG           31.56
DW           62.400 usec
DE           6.50 usec
TE           296.1 K
D1           1.0000000 sec
TD0          1

----- CHANNEL f1 -----
SFO1         400.1522008 MHz
NUC1         1H
P1           10.75 usec
SI           65536
SF           400.1500068 MHz
WDW          EM
SSB          0
LB           0.30 Hz
GB           0
PC           1.00
  
```

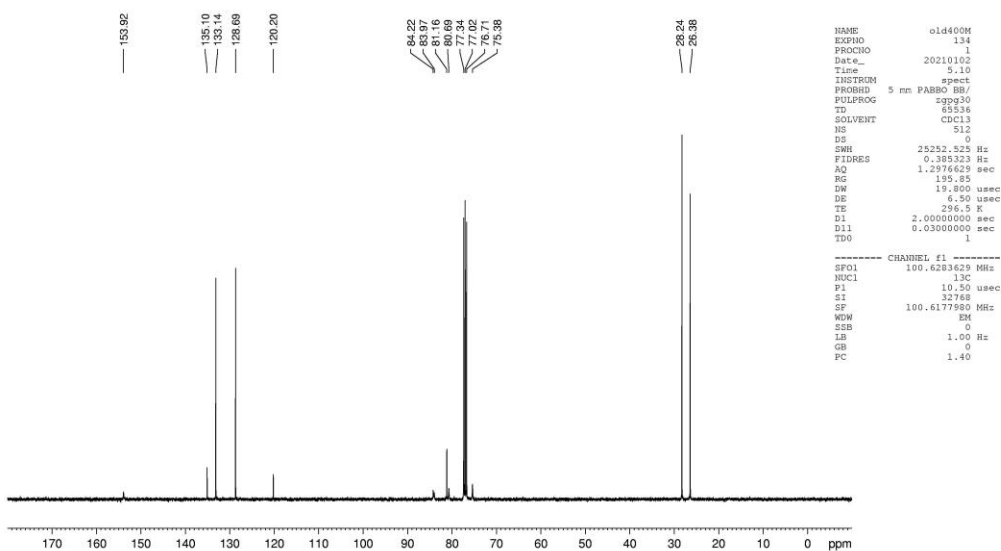

```

NAME          o1d400M
EXPNO         134
PROCNO        1
Date_         20210102
Time          5.10
INSTRUM       spect
PROBHD        5 mm PABBO BB/
PULPROG       zgpg30
TD            65536
SOLVENT       CDCl3
NS            512
DS            0
SWH           25252.525 Hz
FIDRES       0.383323 Hz
AQ           1.2976629 sec
RG           195.85
DW           19.800 usec
DE           6.50 usec
TE           296.5 K
D1           2.0000000 sec
D11          0.0300000 sec
TD0          1

----- CHANNEL f1 -----
SFO1         100.6283629 MHz
NUC1         13C
P1           10.250 usec
SI           32768
SF           100.6177980 MHz
WDW          EM
SSB          0
LB           1.00 Hz
GB           0
PC           1.40
  
```

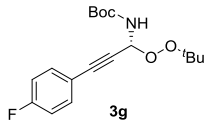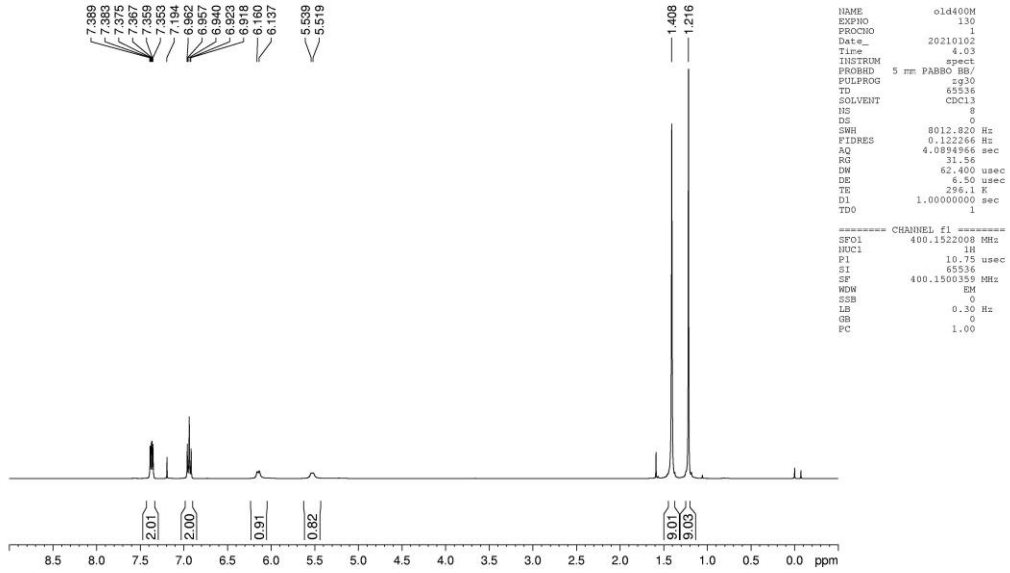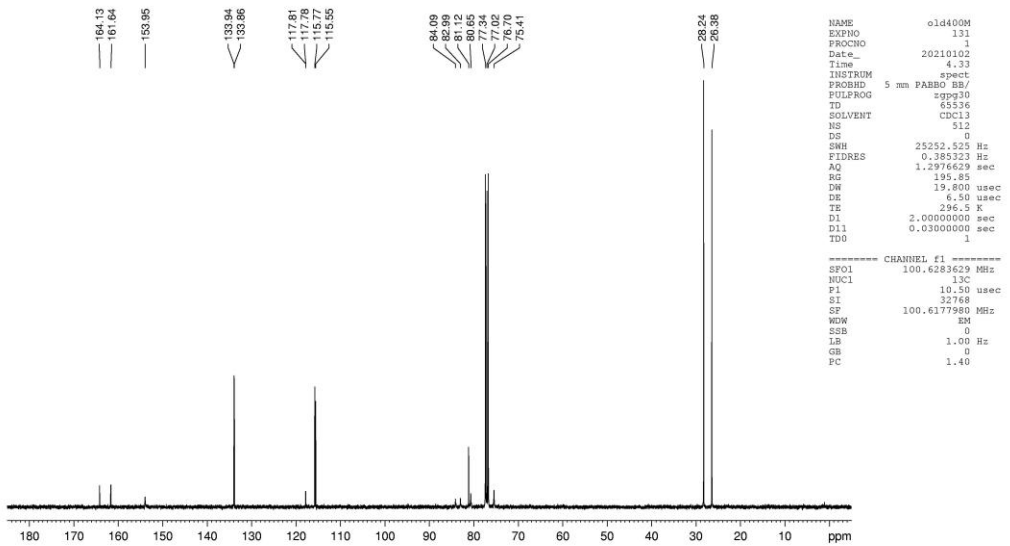

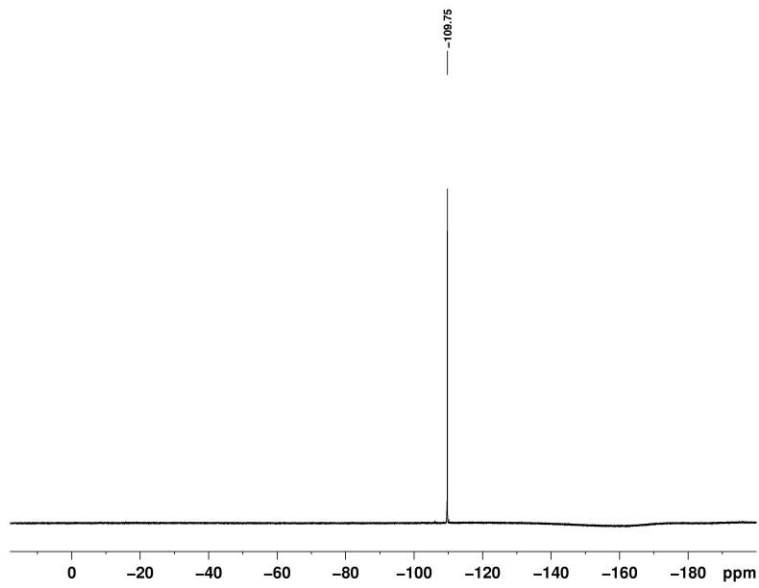

```

NAME          o1d400M
EXPNO         132
PROCNO        1
Date_         20210102
Time          4.35
INSTRUM       spect
PROBHD        5 mm PABBO BB/
PULPROG       zgpg30p.2
TD            131072
SOLVENT       CDCl3
NS            16
DS            4
SWH           89285.711 Hz
FIDRES        0.4681196 Hz
AQ            0.7540532 sec
RG            195.85
DW            5.600 usec
DE            6.50 usec
TE            296.4 K
D1            1.00000000 sec
D12           0.00002000 sec
TD0           1
----- CHANNEL f1 -----
SF01          376.4795333 MHz
NUC1           19F
P1            14.00 usec
SI            65536
SF            376.5171850 MHz
WDW           EM
SSB            0
LB            0.30 Hz
GB            0
PC            1.00

```



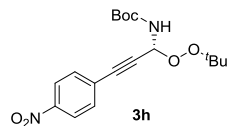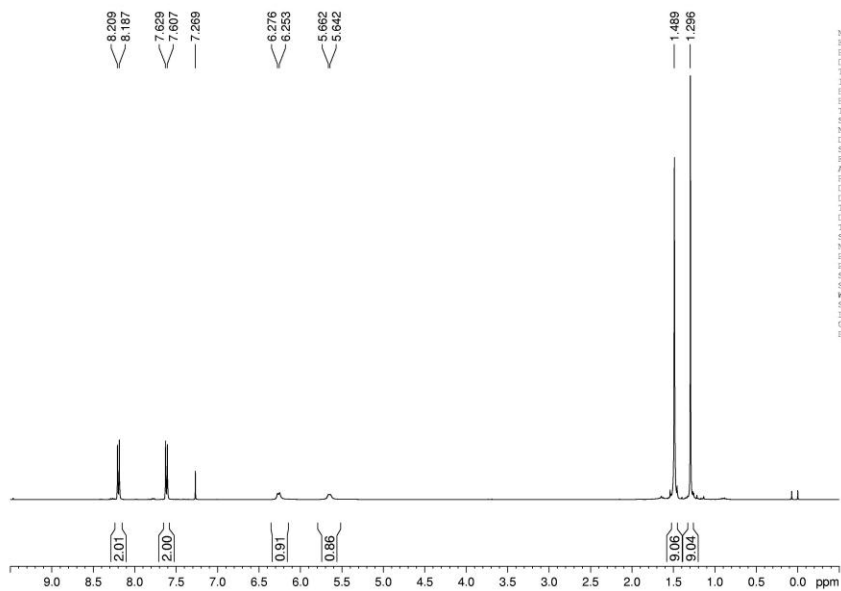

```

NAME      new400M
EXPNO     204
PROCNO    1
Date_     20210102
Time      0.26 h
INSTRUM   Avance
PROBHD    Z116098_0861 (
PULPROG   zgpg30
TD         65536
SOLVENT   CDCl3
NS         8
DS         0
SWH        5555.526 Hz
FIDRES     0.159542 Hz
AQ         5.8982902 sec
RG         101
DW         90.000 usec
DE         9.46 usec
TE         299.2 K
D1         1.00000000 sec
TDO        1
SFO1       400.1321847 MHz
NUC1       1H
PQ         3.50 usec
P1         10.50 usec
SI         65536
SF         400.1300055 MHz
WDW        EM
SSB        0
LB         0.30 Hz
GB         0
PC         1.00
  
```

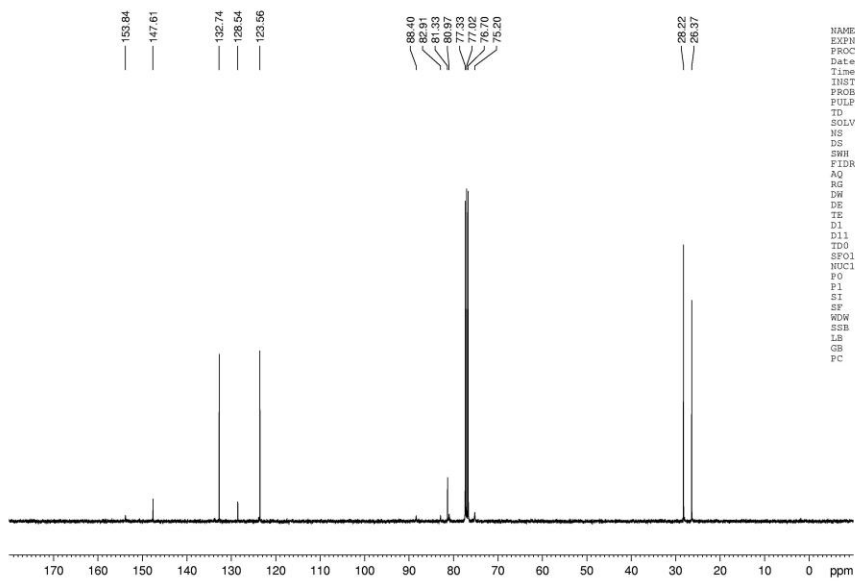

```

NAME      new400M
EXPNO     205
PROCNO    1
Date_     20210102
Time      1.27 h
INSTRUM   Avance
PROBHD    Z116098_0861 (
PULPROG   zgpg30
TD         65536
SOLVENT   CDCl3
NS         12
DS         0
SWH        25000.000 Hz
FIDRES     0.762939 Hz
AQ         1.3107700 sec
RG         38.9428
DW         20.000 usec
DE         6.50 usec
TE         299.8 K
D1         2.00000000 sec
D11        0.03000000 sec
TDO        1
SFO1       100.6238359 MHz
NUC1       13C
PQ         3.17 usec
P1         9.50 usec
SI         32768
SF         100.6127685 MHz
WDW        EM
SSB        0
LB         1.00 Hz
GB         0
PC         1.40
  
```

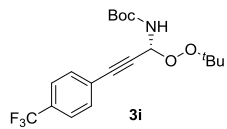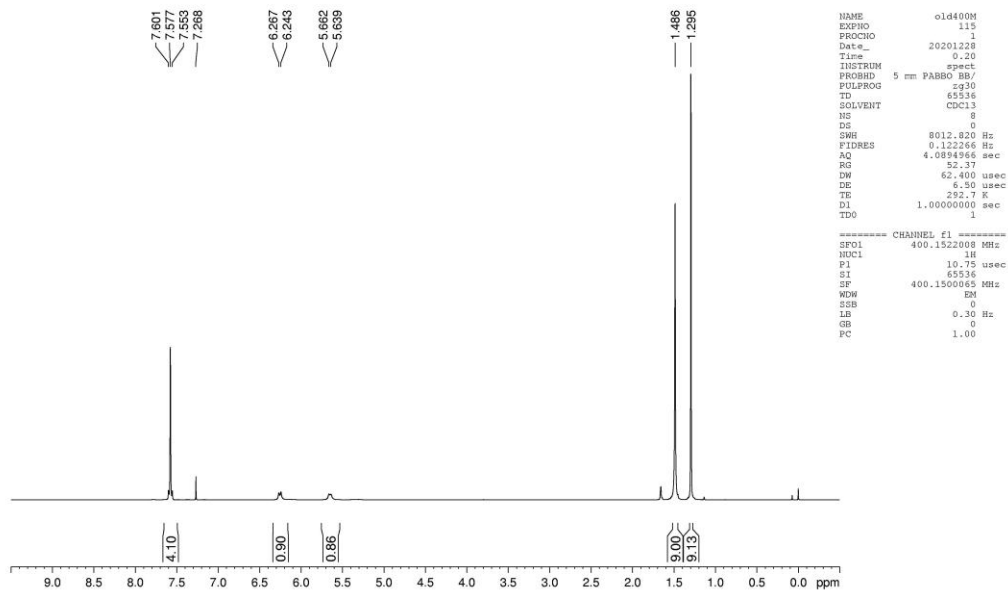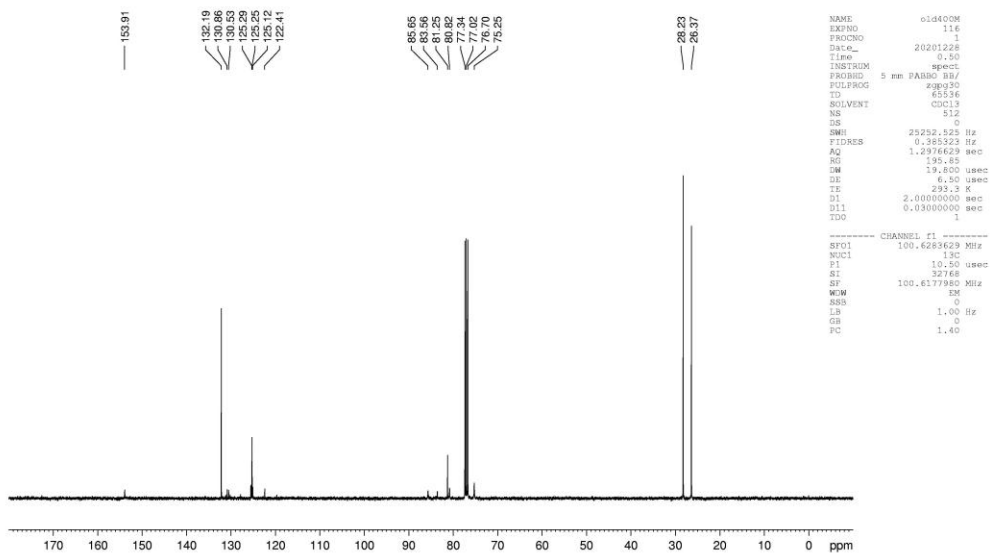

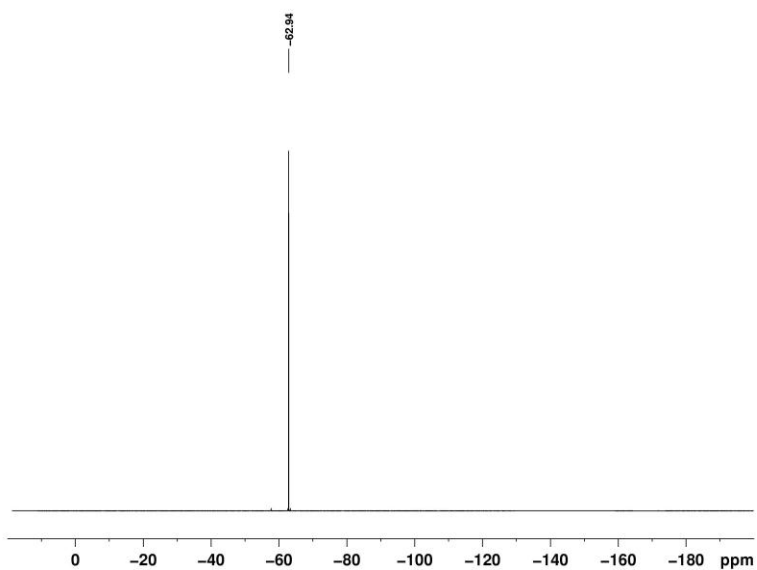

```

NAME          old400M
EXPNO         117
PROCNO        1
Date_         20201228
Time         0.52
INSTRUM       spect
PROBHD        5 mm PASPO BB/
PULPROG       zgfhigqn.2
TD            131072
SOLVENT       CDCl3
NS            16
DS            4
SWH           89285.711 Hz
FIDRES        0.681196 Hz
AQ            0.7340532 sec
RG            195.85
DW            5.600 usec
DE            6.50 usec
TE            293.1 K
D1            1.00000000 sec
D11           0.03000000 sec
D12           0.00002000 sec
TD0           1

===== CHANNEL f1 =====
SFO1          376.475333 MHz
NUC1          19F
P1            14.00 usec
SI            65536
SF            376.5171850 MHz
WDW           EM
SSB           0
LB            0.30 Hz
GB            0
PC            1.00

```

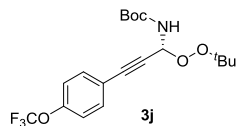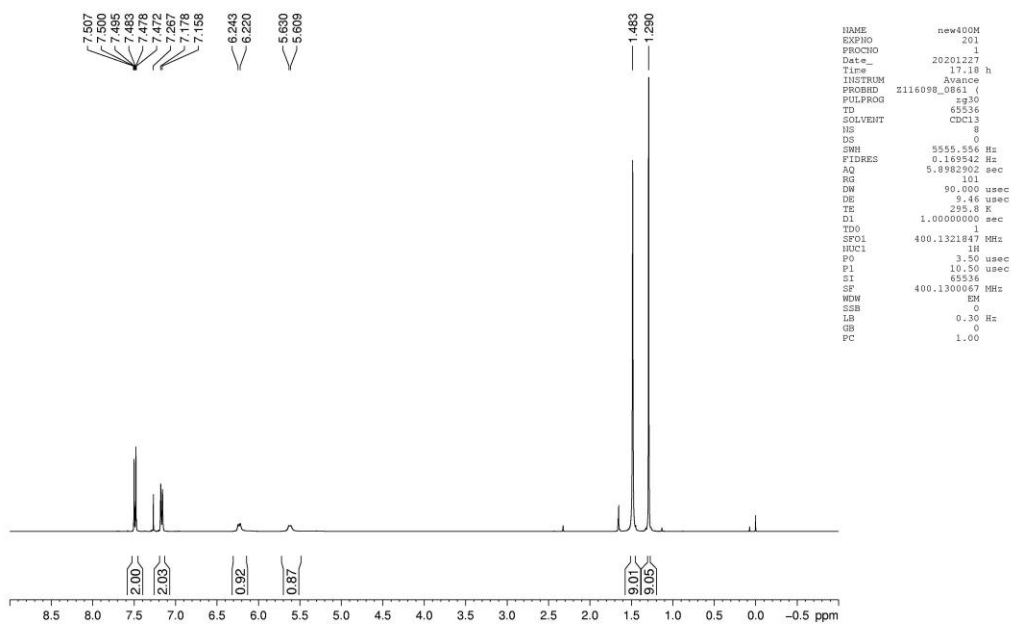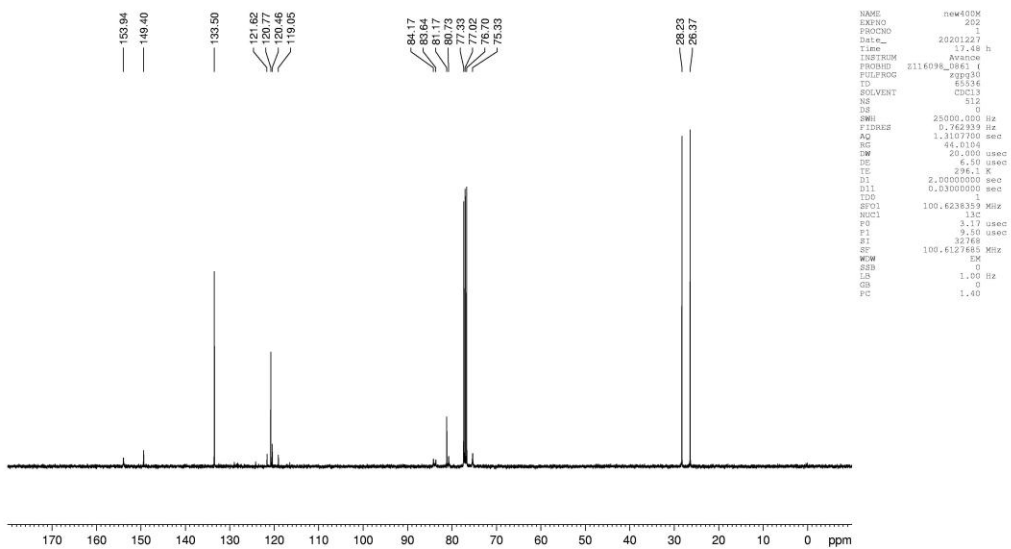

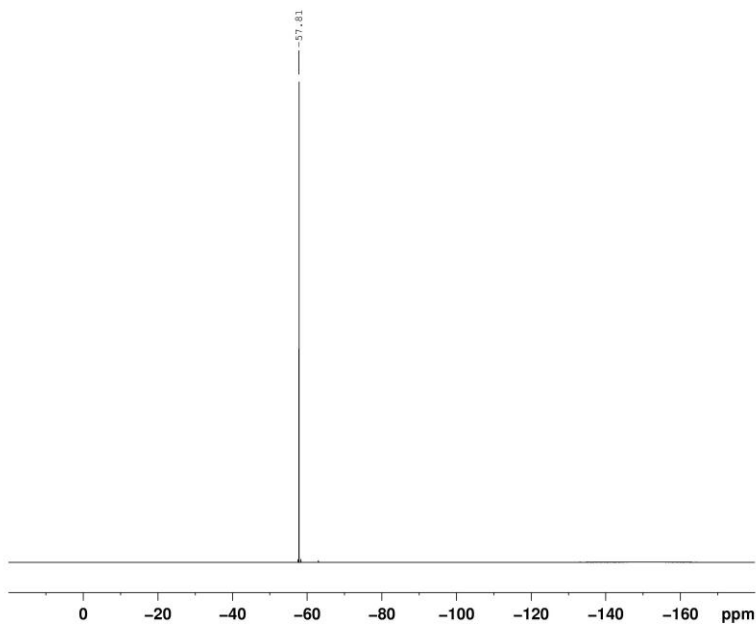

```

NAME          new400M
EXPNO         203
PROCNO        1
Date_         20201227
Time          17.50 h
INSTRUM       Avance
PROBHD        Z116098_0861 (
PULPROG       zgpg
TD            131072
SOLVENT       CDCl3
NS            16
DS            4
SWH           90909.094 Hz
FIDRES        1.387163 Hz
AQ            0.7209460 sec
RG            101
DW            5.500 usec
DE            6.50 usec
TE            296.0 K
D1            1.0000000 sec
D11           0.03000000 sec
TD0           1
SF01          376.4607164 MHz
NUC1          13C
P1            18.00 usec
SI            65536
SF            376.4983662 MHz
WDW           EM
SSB           0
LB            0.30 Hz
GB            0
PC            1.00

```

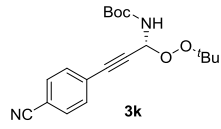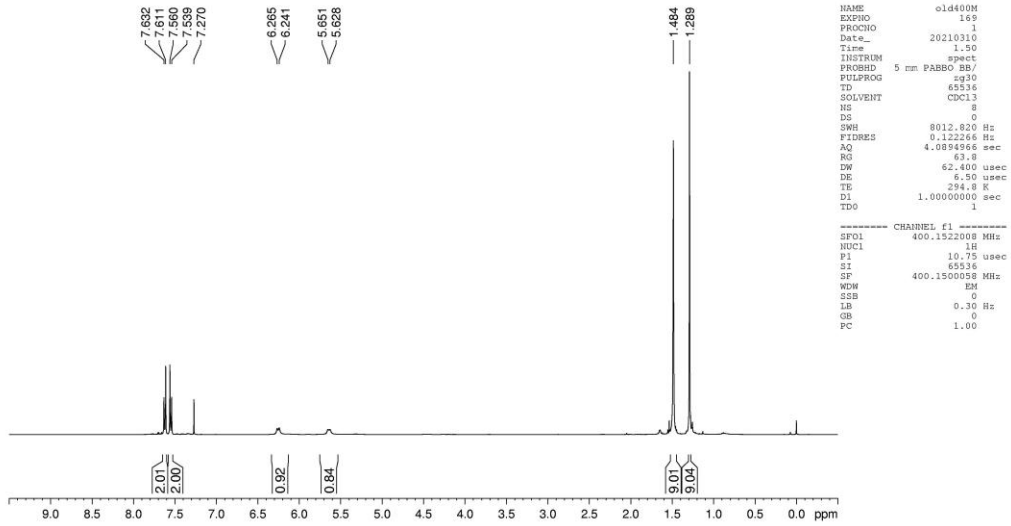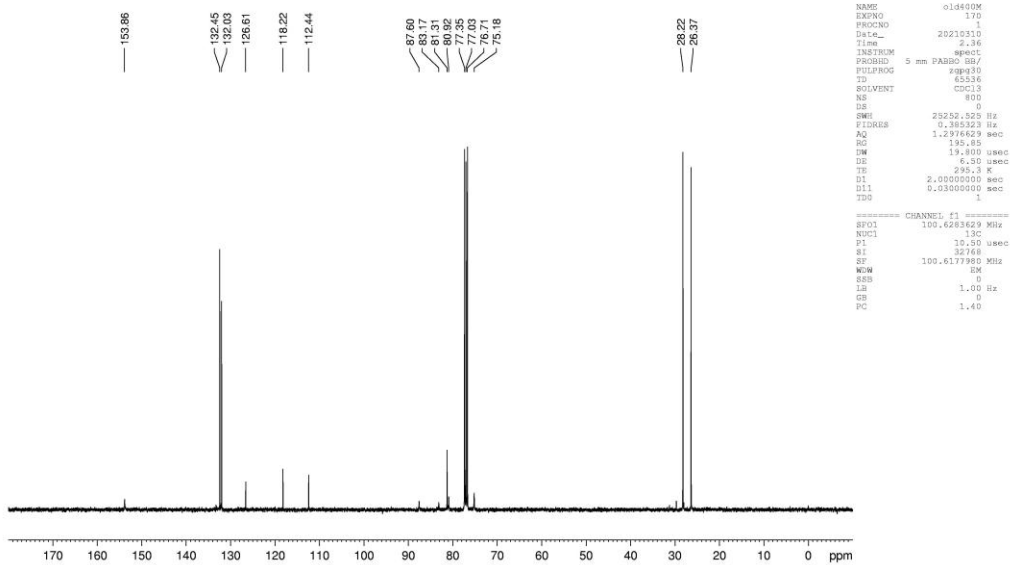

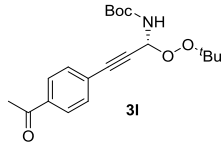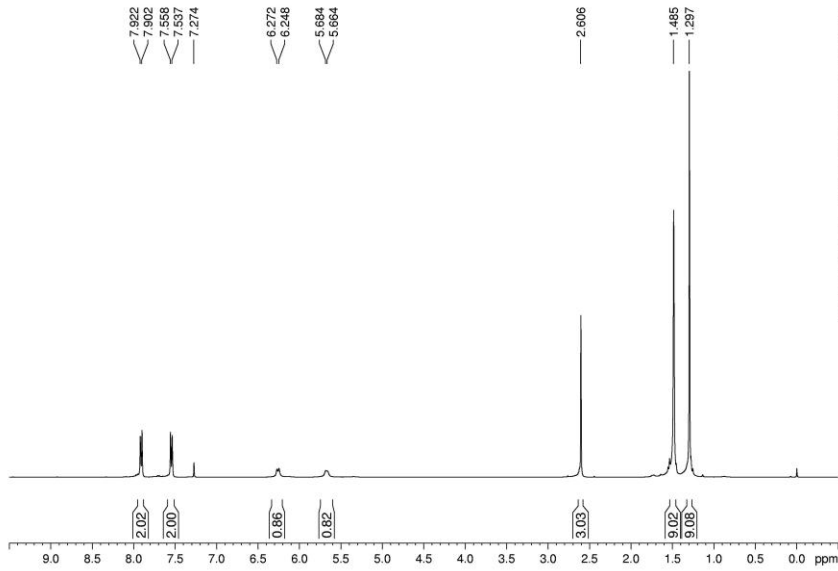

```

NAME      old400M
EXPNO     160
PROCNO    1
Date_     20210127
Time      16.52
INSTRUM   spect
PROBHD    5 mm PABBO BB/
PULPROG   zg30
TD         65536
SOLVENT   CDCl3
NS         8
DS         0
SWH       8012.820 Hz
FIDRES    0.122266 Hz
AQ         4.0894966 sec
RG         31.86
DW         62.400 usec
DE         6.50 usec
TE         292.8 K
D1         1.0000000 sec
TDO        1

===== CHANNEL f1 =====
SFO1      400.1522008 MHz
NUC1       1H
P1         10.75 usec
SI         65536
SF         400.1500042 MHz
WDW        EM
SSB        0
LB         0.30 Hz
GB         0
PC         1.00
  
```

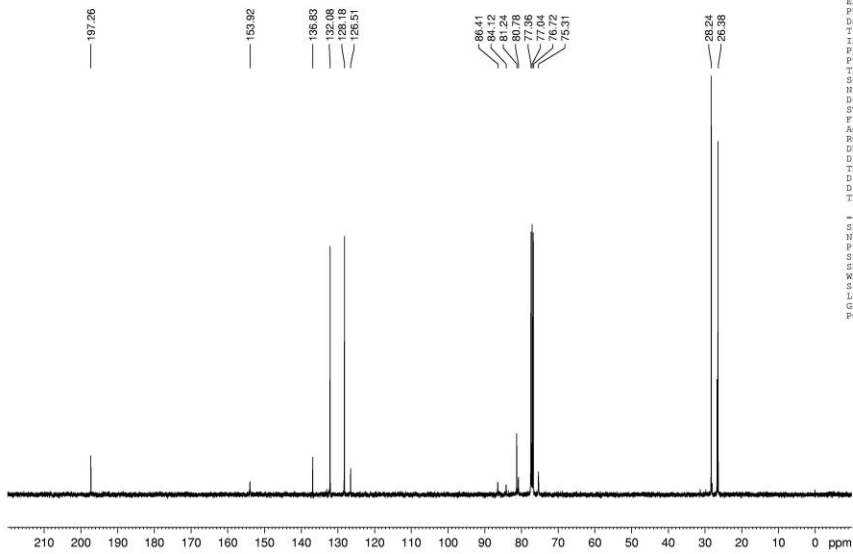

```

NAME      old400M
EXPNO     161
PROCNO    1
Date_     20210127
Time      17.22
INSTRUM   spect
PROBHD    5 mm PABBO BB/
PULPROG   zgpg30
TD         65536
SOLVENT   CDCl3
NS         512
DS         0
SWH       25252.525 Hz
FIDRES    0.385323 Hz
AQ         1.2976623 sec
RG         125.85
DW         19.800 usec
DE         6.50 usec
TE         293.2 K
D1         2.0000000 sec
D11        0.0300000 sec
TDO        1

===== CHANNEL f1 =====
SFO1      100.6283629 MHz
NUC1      13C
P1         10.50 usec
SI         32768
SF         100.6177780 MHz
WDW        EM
SSB        0
LB         1.00 Hz
GB         0
PC         1.40
  
```

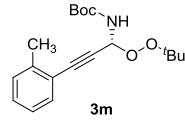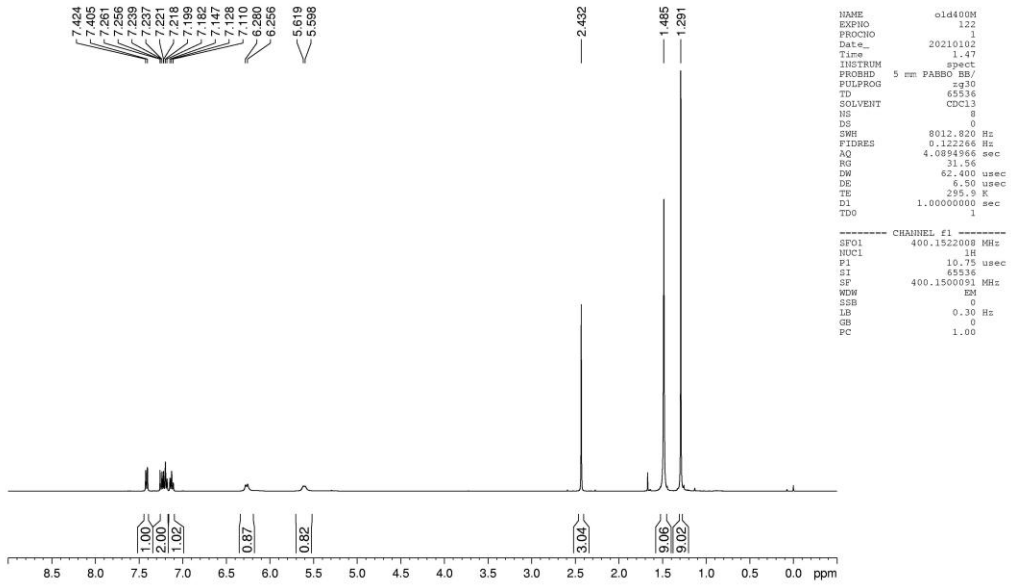

```

NAME          01d400M
EXPNO         122
PROCNO        1
Date_         20210102
Time          1.47
INSTRUM       spect
PROBHD        5 mm PABBO BB/
PULPROG       zg30
TD            65536
SOLVENT       CDCl3
NS            8
DS            0
SWH           8012.820 Hz
FIDRES        0.122266 Hz
AQ            4.0384765 sec
RG            31.56
DW            62.400 usec
DE            6.50 usec
TE            295.3 K
D1            1.0000000 sec
TDO           1
===== CHANNEL f1 =====
SF01          400.1522098 MHz
NUC1          1H
P1            10.75 usec
SI            65536
SF            400.1500093 MHz
WDW           EM
SSB           0
LB            0.30 Hz
GB            0
PC            1.00
  
```

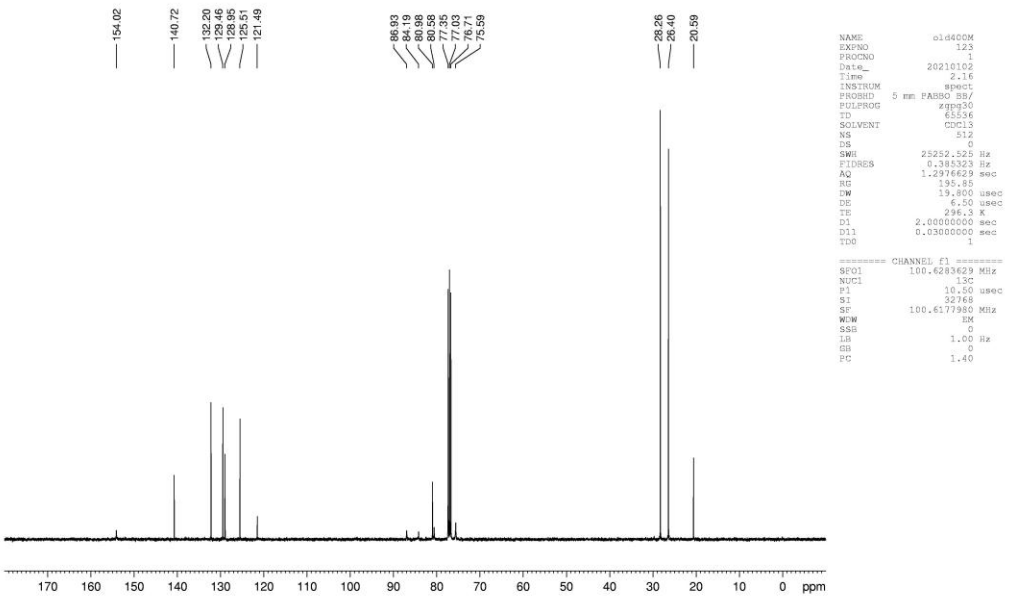

```

NAME          01d400M
EXPNO         123
PROCNO        1
Date_         20210102
Time          2.16
INSTRUM       spect
PROBHD        5 mm PABBO BB/
PULPROG       zgpg30
TD            65536
SOLVENT       CDCl3
NS            512
DS            0
SWH           25252.525 Hz
FIDRES        0.385323 Hz
AQ            1.2976629 sec
RG            135.85
DW            19.800 usec
DE            6.50 usec
TE            296.3 K
D1            2.0000000 sec
D11           0.0300000 sec
TDO           1
===== CHANNEL f1 =====
SF01          100.6283629 MHz
NUC1          13C
P1            10.50 usec
SI            32768
SF            100.6177980 MHz
WDW           EM
SSB           0
LB            1.00 Hz
GB            0
PC            1.40
  
```



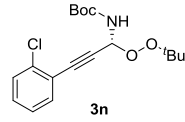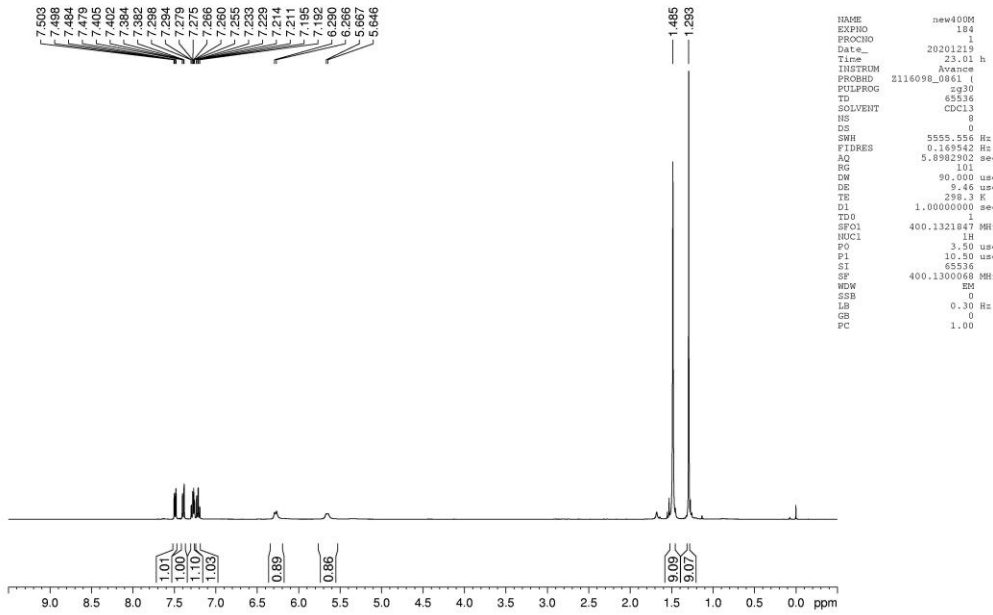

```

NAME          new400M
EXPNO         184
PROCNO        1
Date_         20201219
Time          23.01 h
INSTRUM       Avance
PROBHD        Z116098_0861 (
PULPROG       zg30
TD            65536
SOLVENT       CDCl3
NS            0
DS            0
SWH           5555.556 Hz
FIDRES        0.169542 Hz
AQ            5.8992902 sec
RG            101
DW            90.000 usec
DE            9.46 usec
TE            298.3 K
D1            1.00000000 sec
TD0           1
SFO1          400.1321847 MHz
NUC1          1H
PC            3.50 usec
PL            10.50 usec
SI            65536
SF            400.1300060 MHz
WDW           EM
SSB           0
LB            0.30 Hz
GB            0
PC            1.00
  
```

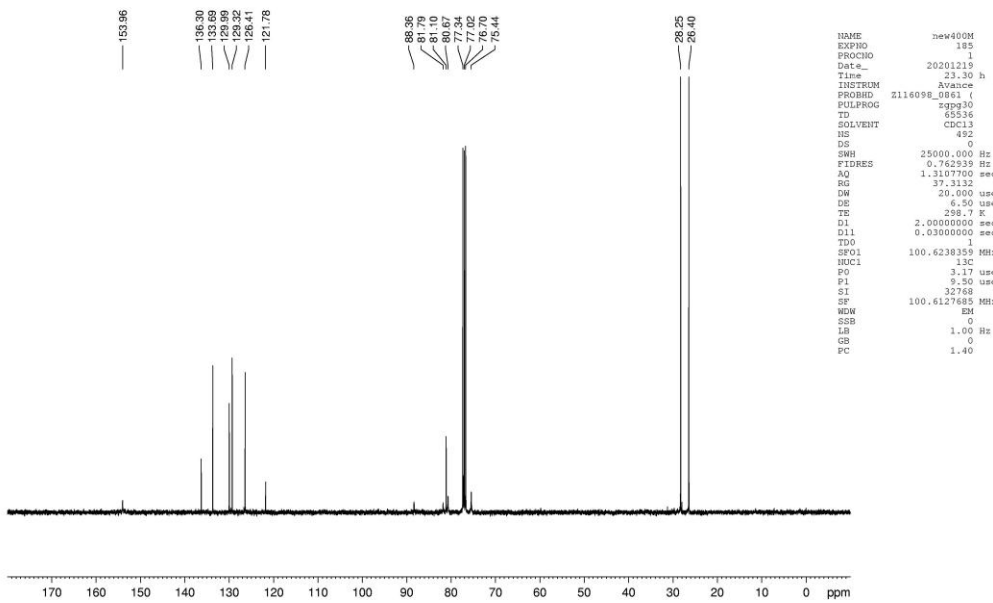

```

NAME          new400M
EXPNO         185
PROCNO        1
Date_         20201219
Time          23.30 h
INSTRUM       Avance
PROBHD        Z116098_0861 (
PULPROG       zgpg30
TD            65536
SOLVENT       CDCl3
NS            492
DS            0
SWH           25000.000 Hz
FIDRES        0.743239 Hz
AQ            1.3107700 sec
RG            37.3132
DW            20.000 usec
DE            6.50 usec
TE            298.7 K
D1            2.00000000 sec
D11           0.03000000 sec
TD0           1
SFO1          100.6238359 MHz
NUC1          13C
PC            3.17 usec
PL            9.50 usec
SI            32768
SF            100.6127685 MHz
WDW           EM
SSB           0
LB            1.00 Hz
GB            0
PC            1.40
  
```

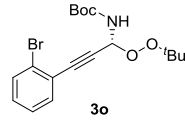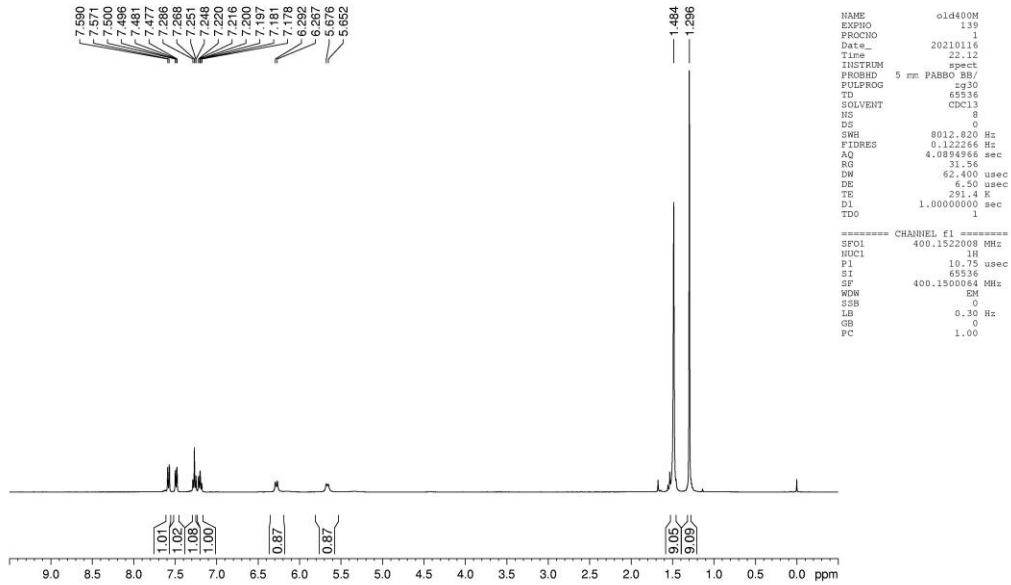

```

NAME          o1d400M
EXPNO         139
PROCNO        1
Date_         20210116
Time         22.12
INSTRUM       spect
PROBHD        5 mm PABBO BB/
PULPROG       zg30
TD            65536
SOLVENT       CDCl3
NS            8
DS            0
SWH           8012.820 Hz
FIDRES       0.122266 Hz
AQ           4.0894866 sec
RG           31.56
DW           62.400 usec
DE           6.50 usec
TE           291.4 K
D1           1.00000000 sec
TDO          1

===== CHANNEL f1 =====
SF01         400.1522008 MHz
NUC1         1H
P1           10.75 usec
SI           65536
SF           400.1500064 MHz
WDW          EM
SSB          0
LB           0.30 Hz
GB           0
PC           1.00

```

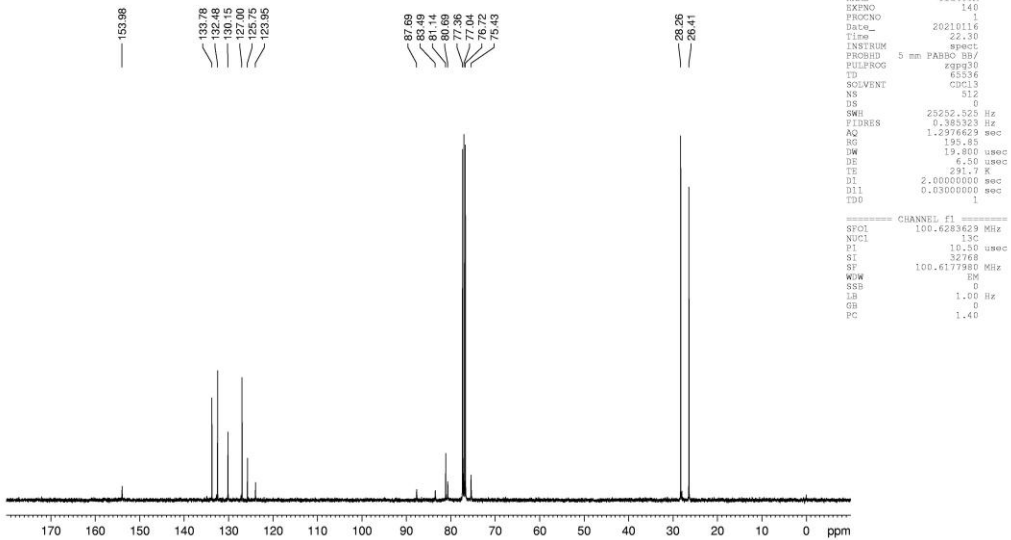

```

NAME          o1d400M
EXPNO         140
PROCNO        1
Date_         20210116
Time         22.30
INSTRUM       spect
PROBHD        5 mm PABBO BB/
PULPROG       zgpg30
TD            65536
SOLVENT       CDCl3
NS            8
DS            0
SWH           25252.525 Hz
FIDRES       0.383323 Hz
AQ           1.2976629 sec
RG           195.85
DW           19.800 usec
DE           6.50 usec
TE           291.7 K
D1           2.00000000 sec
D11          0.03000000 sec
TDO          1

===== CHANNEL f1 =====
SF01         100.6283629 MHz
NUC1         13C
P1           10.50 usec
SI           32768
SF           100.6177780 MHz
WDW          EM
SSB          0
LB           1.00 Hz
GB           0
PC           1.40

```

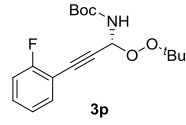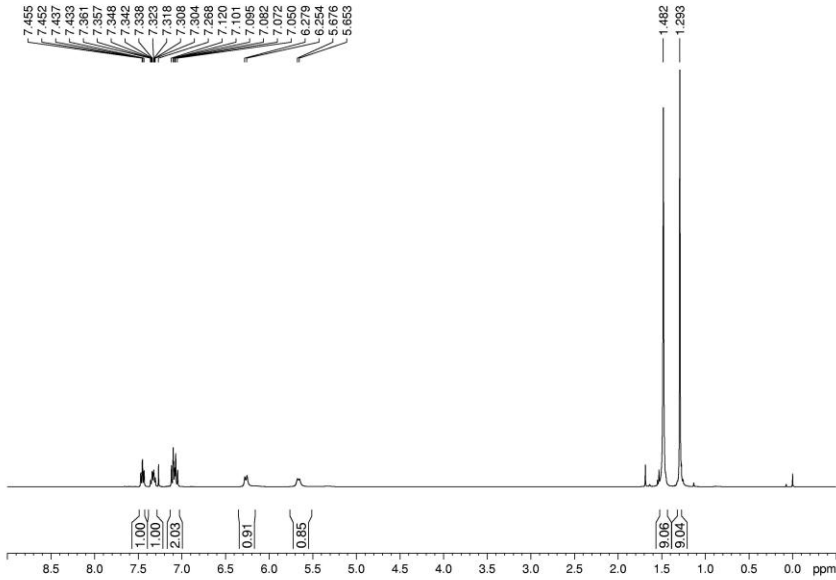

```

NAME      new400M
EXPNO    213
PROCNO   1
Date_    20210116
Time     23.43 h
INSTRUM  Avance
PROBHD   Z116098_0081 4
PULPROG  zg30
TD       65536
SOLVENT  CDCl3
NS       8
DS       0
SWH      5555.536 Hz
FIDRES   0.169942 Hz
AQ       5.8982302 sec
RG       95.8865
AW       90.000 usec
DE       9.46 usec
TE       294.1 K
D1       1.00000000 sec
TD0      1
SFO1     400.1321847 MHz
NUC1     1H
PC       3.50 usec
P1       10.50 usec
SI       65536
SF       400.1300061 MHz
WDW      EM
SSB      0
LB       0.30 Hz
GB       0
PC       1.00
  
```

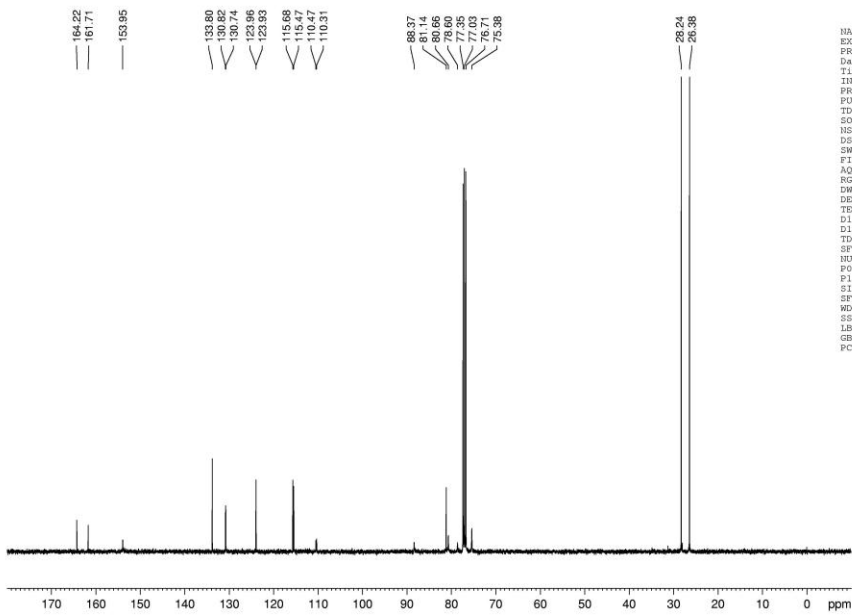

```

NAME      new400M
EXPNO    214
PROCNO   1
Date_    20210117
Time     0.13 h
INSTRUM  Avance
PROBHD   Z116098_0081 1
PULPROG  zgpg30
TD       65536
SOLVENT  CDCl3
NS       512
DS       0
SWH      25000.000 Hz
FIDRES   0.762359 Hz
AQ       1.1107700 sec
RG       34.7095
AW       20.000 usec
DE       6.50 usec
TE       294.3 K
D1       2.00000000 sec
D11      0.03000000 sec
TD0      1
SFO1     100.6238359 MHz
NUC1     13C
PC       3.17 usec
P1       9.50 usec
SI       32768
SF       100.6127685 MHz
WDW      EM
SSB      0
LB       1.00 Hz
GB       0
PC       1.40
  
```

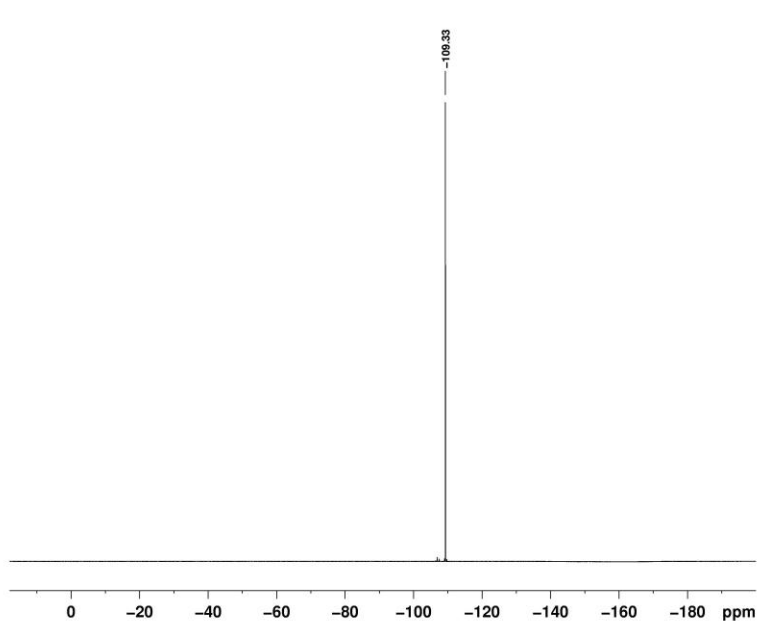

```

NAME          new400M
EXPNO         215
PROCNO        1
Date_         20210117
Time          0.15 h
INSTRUM       Avance
PROBHD        Z116098_0861 (
PULPROG       zg30
TD            131072
SOLVENT       CDCl3
NS            16
DS            4
SWH           90909.094 Hz
FIDRES        1.387163 Hz
AQ            0.7209460 sec
RG            101
DW            5.500 usec
DE            6.50 usec
TE            294.4 K
D1            1.0000000 sec
D11           0.0300000 sec
TD0           1
SFO1          376.4607164 MHz
NUC1          19F
P1            18.00 usec
SI            65526
SF            376.4983662 MHz
WDW           EM
SSB           0
LB            0.30 Hz
GB            0
PC            1.00

```

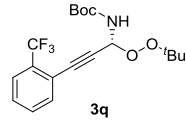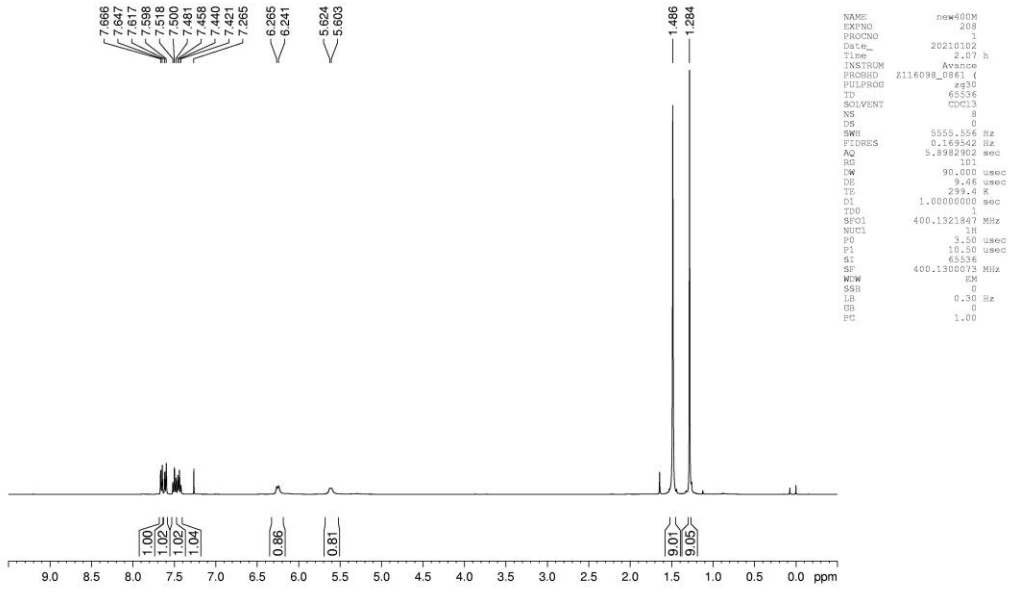

```

NAME          new400M
EXPNO         209
PROCNO        1
Date_         20210102
Time          2.07 h
INSTRUM       AVANCE
PROBHD        Z116098_0861 (
PULPROG       zg30
TD            65536
SOLVENT       CDCl3
NS            8
DS            0
SWH           5555.556 Hz
FIDRES        0.149342 Hz
AQ            5.8982902 sec
RG            101
LW           90.000 usec
DE           9.46 usec
TE           293.4 K
D1            1.00000000 sec
TD0           1
SFO1          400.1321947 MHz
NUC1          1H
PC            3.50 usec
P1            10.50 usec
SI            65536
SF            400.130072 MHz
WDM           EM
SSB           0
LB            0.30 Hz
GB            0
PC            1.00
  
```

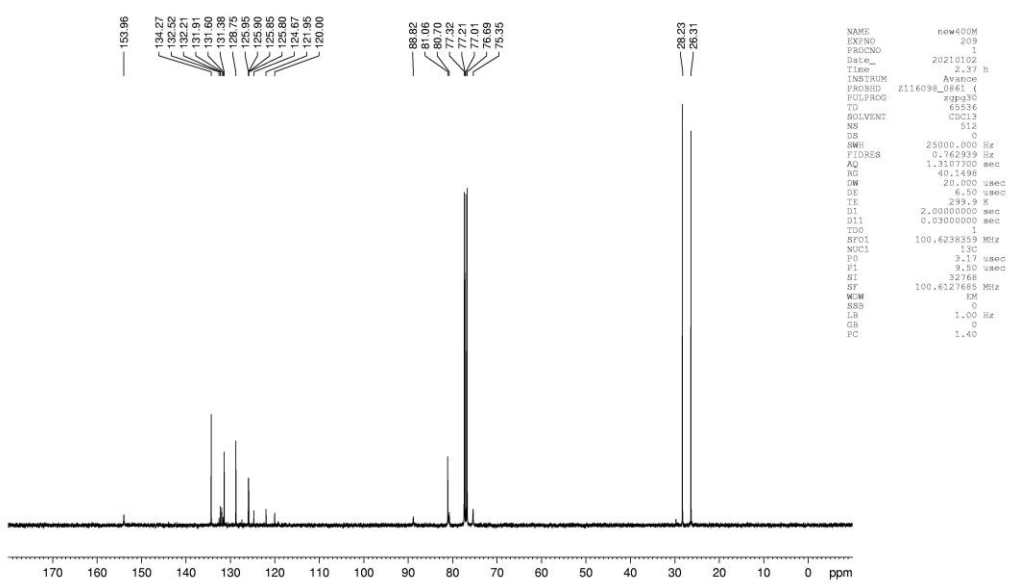

```

NAME          new400M
EXPNO         209
PROCNO        1
Date_         20210102
Time          2.37 h
INSTRUM       AVANCE
PROBHD        Z116098_0861 (
PULPROG       zgpg30
TD            65536
SOLVENT       CDCl3
NS            512
DS            0
SWH           25000.000 Hz
FIDRES        0.762939 Hz
AQ            1.3107700 sec
RG            40.1496
LW           20.000 usec
DE           6.50 usec
TE           293.9 K
D1            2.00000000 sec
D11           0.20000000 sec
TD0           1
SFO1          100.6234559 MHz
NUC1          13C
PC            3.17 usec
P1            9.50 usec
SI            32768
SF            100.6127449 MHz
WDM           EM
SSB           0
LB            1.00 Hz
GB            0
PC            1.40
  
```

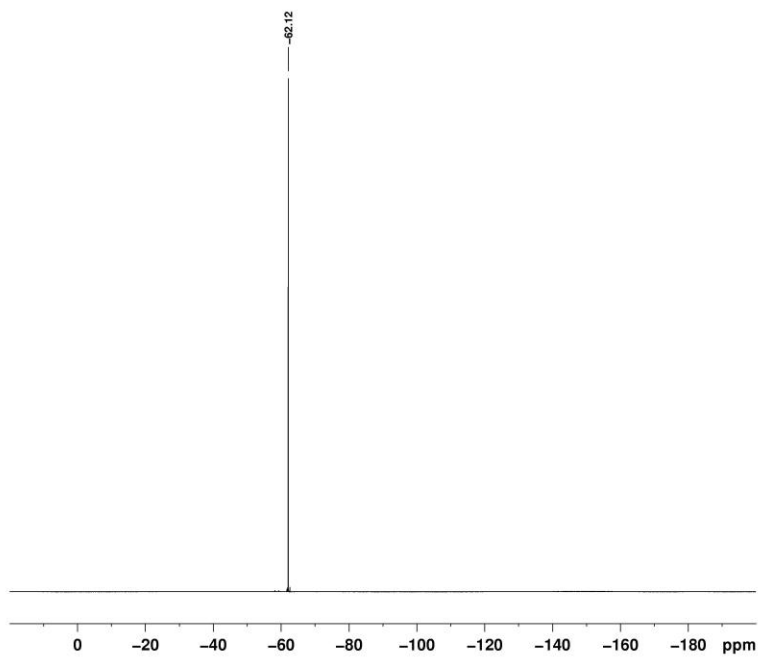

```

NAME          new400M
EXPNO         210
PROCNO        1
Date_         20210102
Time         2.39 h
INSTRUM       Avance
PROBHD        Z116098_0861 (
PULPROG       zgpg
TD            131072
SOLVENT       CDCl3
NS            16
DS            4
SWH           90909.094 Hz
FIDRES        1.387163 Hz
AQ            0.7209460 sec
RG            101
DW            5.500 usec
DE            6.50 usec
TE            299.7 K
D1            1.0000000 sec
D11           0.0300000 sec
TDO           1
SFO1          376.460164 MHz
NUC1          19F
P1            18.00 usec
SI            65536
SF            376.4983662 MHz
WDW           EM
SSB           0
LB            0.30 Hz
GB            0
PC            1.00

```

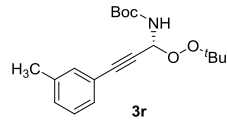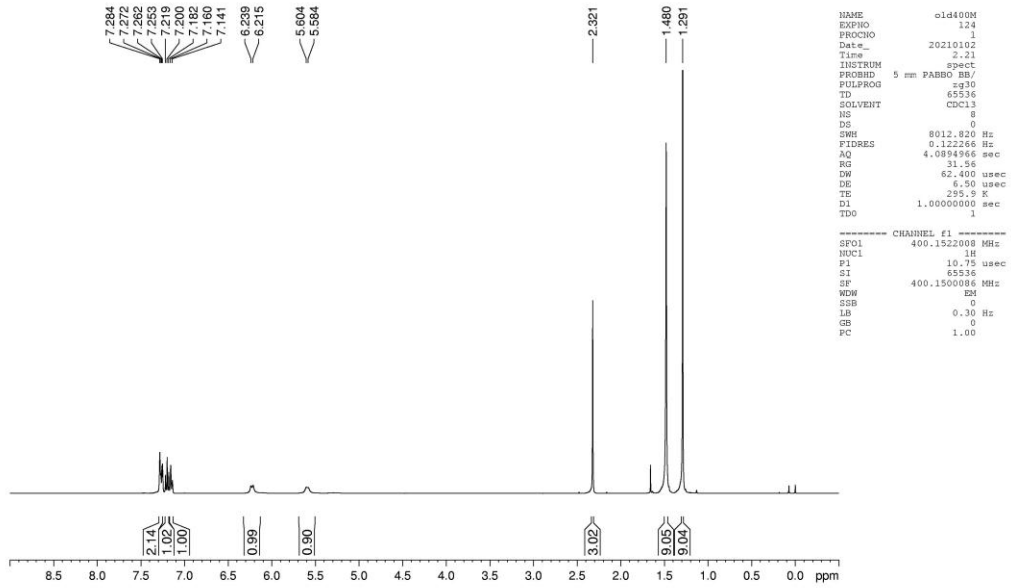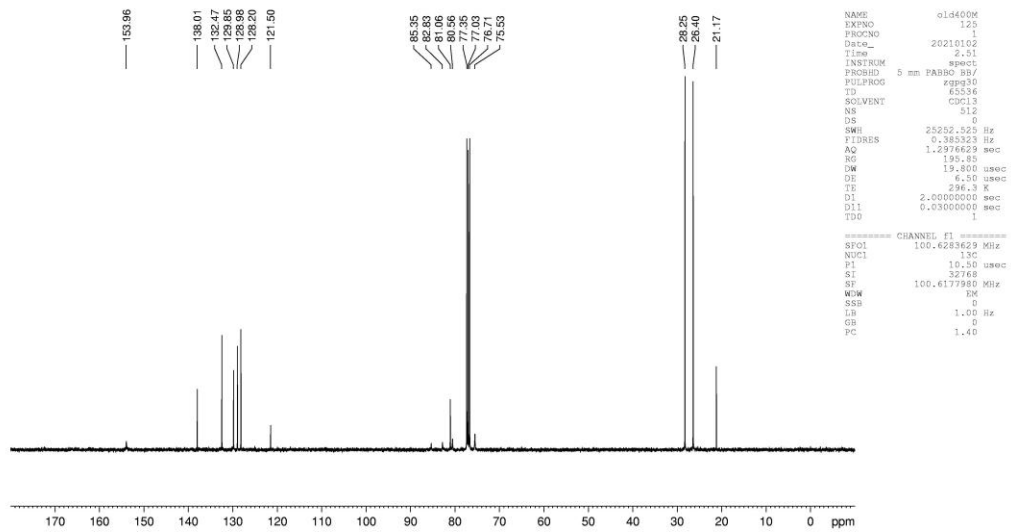

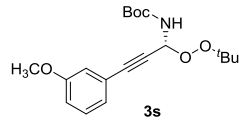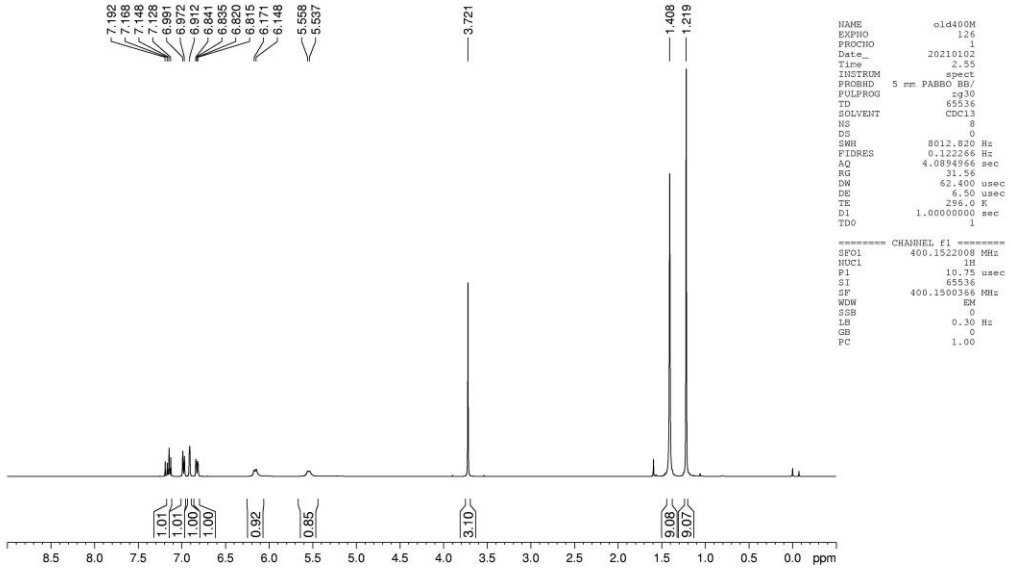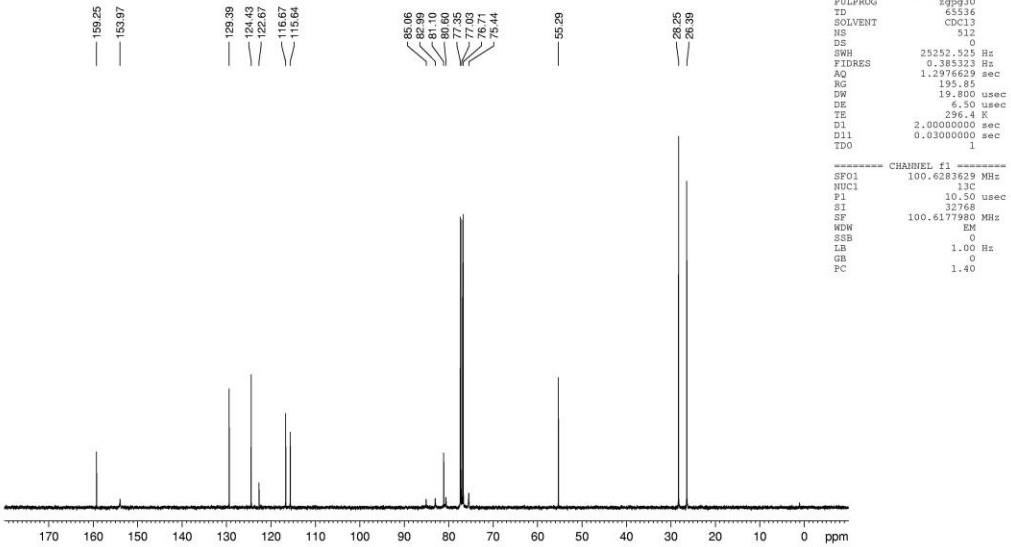



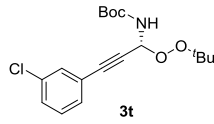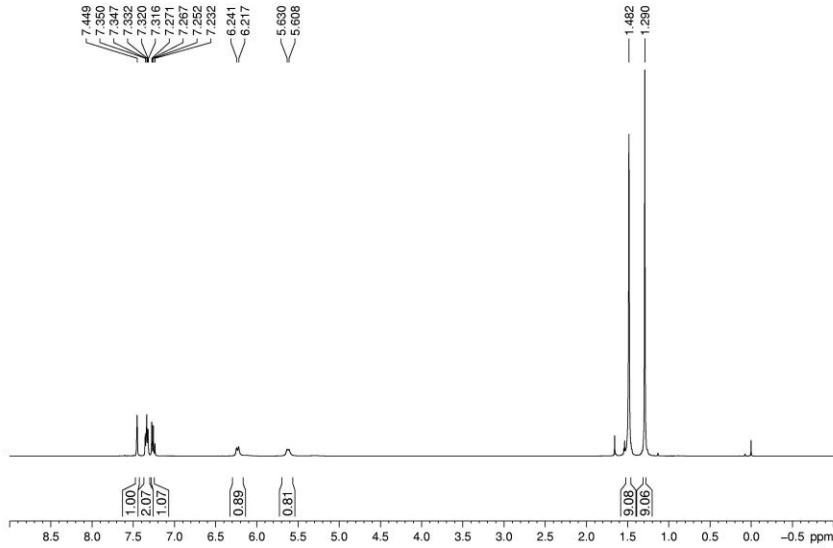

```

NAME      new400M
EXPNO     222
PROCNO    1
Date_     20210117
Time      17:17 h
INSTRUM   Avance
PROBHD    Z116098_0861 (
PULPROG   zgpg30
TD         65536
SOLVENT   CDCl3
NS         8
DS         0
SWH        5955.956 Hz
FIDRES     0.16656 Hz
AQ         5.5982902 sec
RG         101
DM         90.000 usec
DE         9.46 usec
TE         293.0 K
D1         1.0000000 sec
TD0
SFO1      400.1321847 MHz
NUC1       1H
PC         3.50 usec
P1         10.50 usec
SI         65536
SF         400.1300465 MHz
WDM        EM
SGB        0
LB         0.30 Hz
GB         0
PC         1.00
  
```

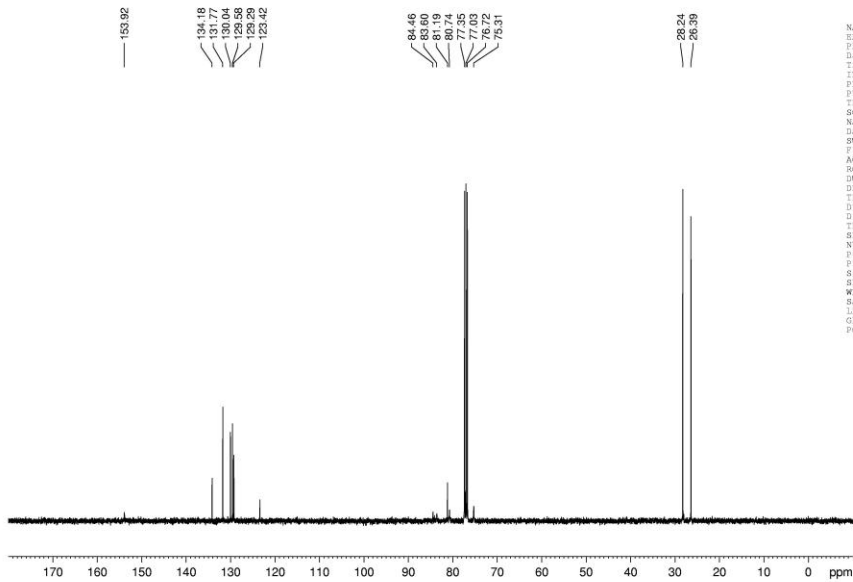

```

NAME      new400M
EXPNO     222
PROCNO    1
Date_     20210117
Time      17:31 h
INSTRUM   Avance
PROBHD    Z116098_0861 (
PULPROG   zgpg30
TD         65536
SOLVENT   CDCl3
NS         216
DS         0
SWH        25000.000 Hz
FIDRES     0.762939 Hz
AQ         1.1107300 sec
RG         33.1673
DM         20.000 usec
DE         6.50 usec
TE         294.0 K
D1         2.0000000 sec
D11        0.0300000 sec
TD0
SFO1      100.6238359 MHz
NUC1       13C
PC         4.17 usec
P1         9.50 usec
SI         32768
SF         100.6127485 MHz
WDM        EM
SGB        0
LB         1.00 Hz
GB         0
PC         1.40
  
```

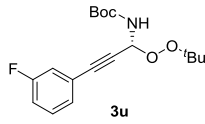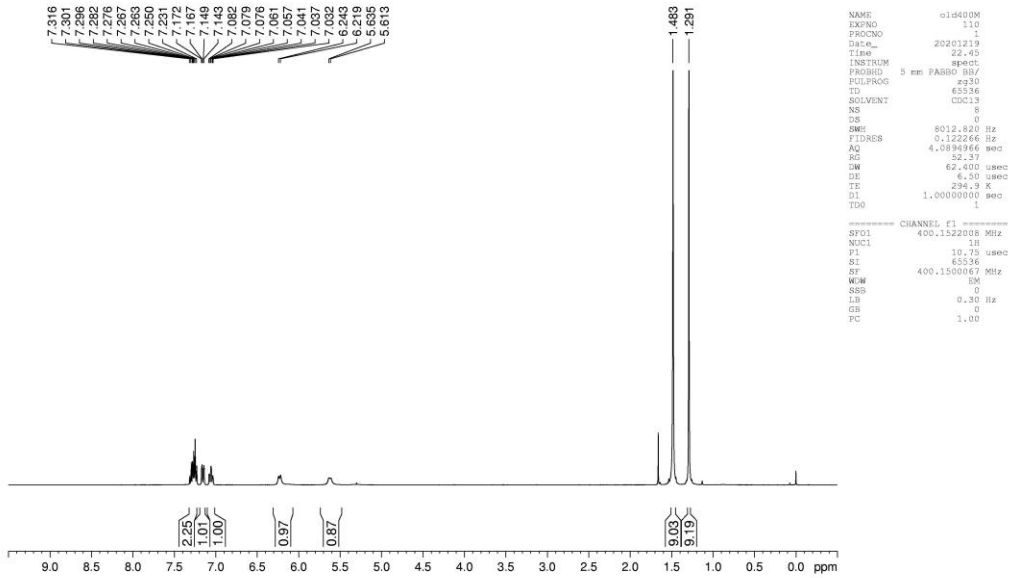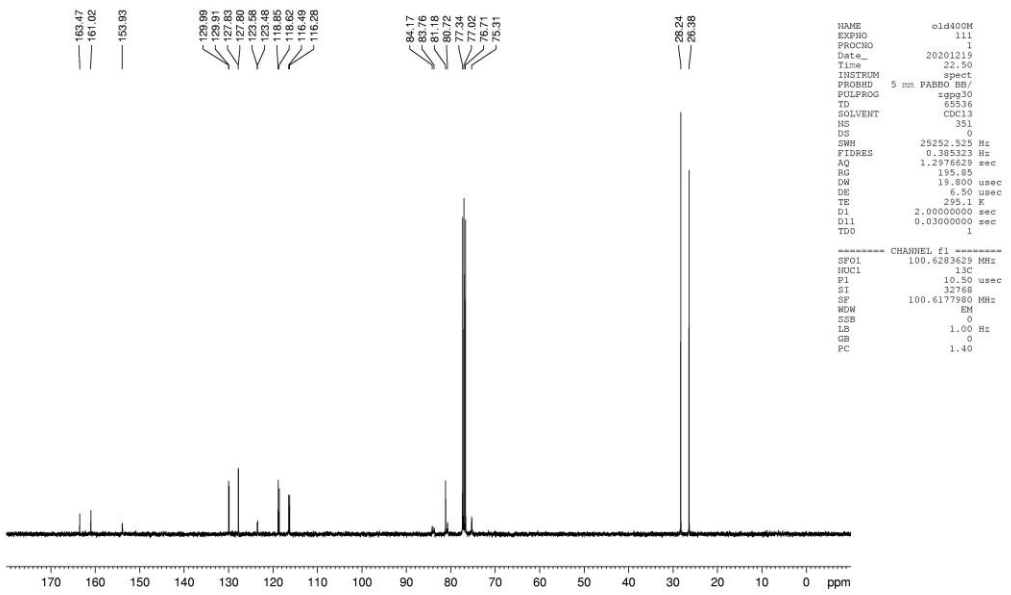

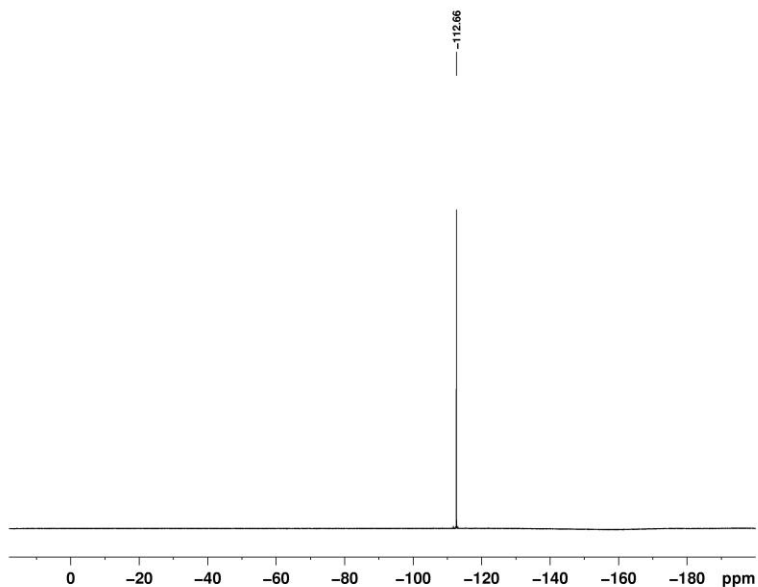

```

NAME          old400M
EXPNO         112
PROCNO        1
Date_         20201219
Time          23.08
INSTRUM       spect
PROBHD        5 mm PABBO BB/
PULPROG       zgpg30pt.2
TD            131072
SOLVENT       CDCl3
NS            16
DS            4
SWH           89285.711 Hz
FIDRES        0.681196 Hz
AQ            0.7340532 sec
RG            195.85
DW            5.600 usec
DE            6.50 usec
TE            295.2 K
D1            1.0000000 sec
D11           0.0300000 sec
D12           0.0000200 sec
TDO           1

===== CHANNEL f1 =====
SFO1          376.4795333 MHz
NUC1          13F
P1            14.00 usec
SI            65536
SF            376.5171850 MHz
WDW           EM
SSB           0
LB            0.30 Hz
GB            0
PC            1.00

```

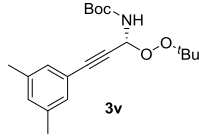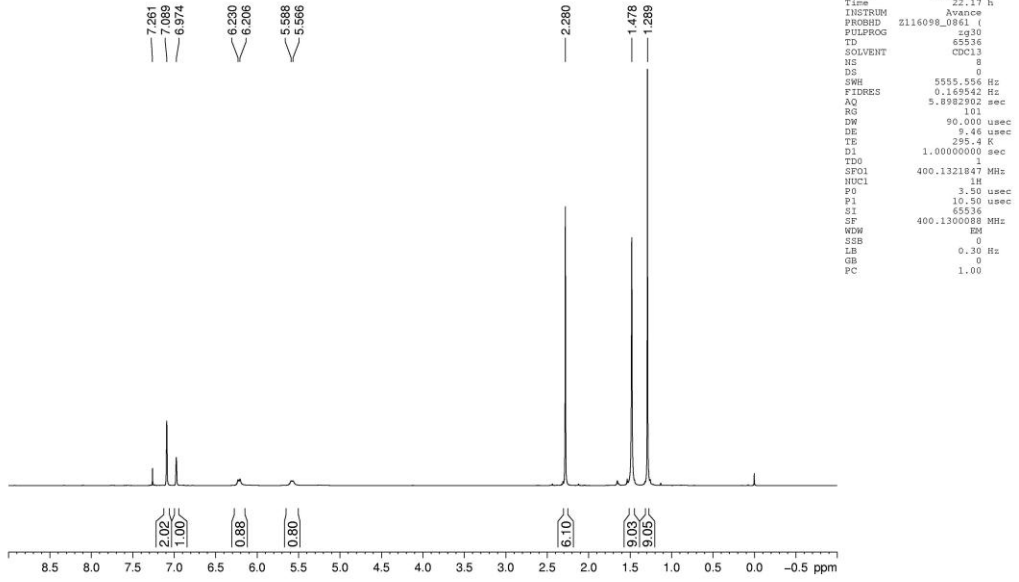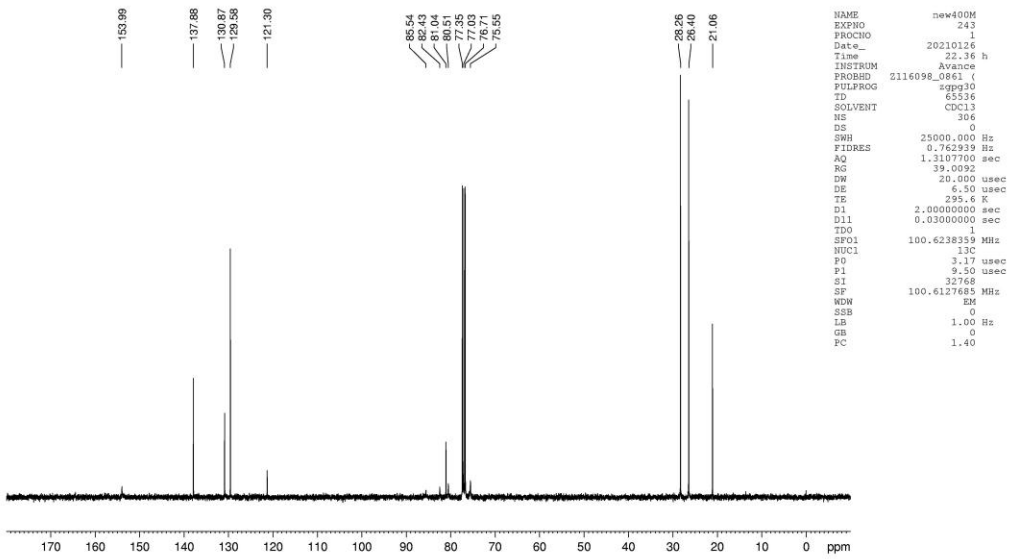

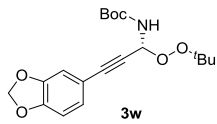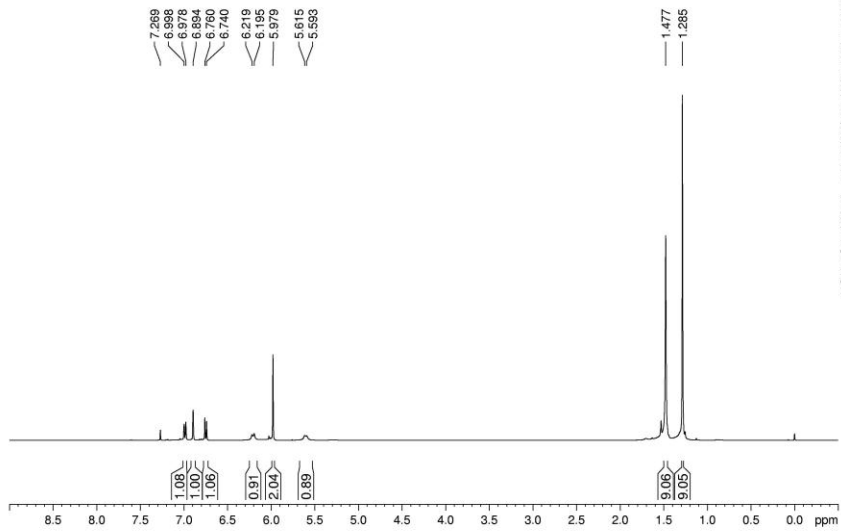

```

NAME      o1d400M
EXPNO     158
PROCNO    1
Date_     20210127
Time      16.17
INSTRUM   spect
PROBHD    5 mm PABBO BB/
PULPROG   zgpg30
TD         65536
FIDRES    0.122266 Hz
RG         31.56
AQ         4.0894966 sec
DE         6.50 usec
TE         292.7 K
D1         1.0000000 sec
D11        0
D12        0
D13        0
D14        0
D15        0
D16        0
D17        0
D18        0
D19        0
D20        0
D21        0
D22        0
D23        0
D24        0
D25        0
D26        0
D27        0
D28        0
D29        0
D30        0
D31        0
D32        0
D33        0
D34        0
D35        0
D36        0
D37        0
D38        0
D39        0
D40        0
D41        0
D42        0
D43        0
D44        0
D45        0
D46        0
D47        0
D48        0
D49        0
D50        0
D51        0
D52        0
D53        0
D54        0
D55        0
D56        0
D57        0
D58        0
D59        0
D60        0
D61        0
D62        0
D63        0
D64        0
D65        0
D66        0
D67        0
D68        0
D69        0
D70        0
D71        0
D72        0
D73        0
D74        0
D75        0
D76        0
D77        0
D78        0
D79        0
D80        0
D81        0
D82        0
D83        0
D84        0
D85        0
D86        0
D87        0
D88        0
D89        0
D90        0
D91        0
D92        0
D93        0
D94        0
D95        0
D96        0
D97        0
D98        0
D99        0
D100       0
===== CHANNEL f1 =====
SFO1      400.1522008 MHz
NUC1      13C
P1         10.75 usec
PL1       0.00 dB
RF         400.1500060 MHz
WDW        EM
SSB        0
LB         0.30 Hz
GB         0
PC         1.00
  
```

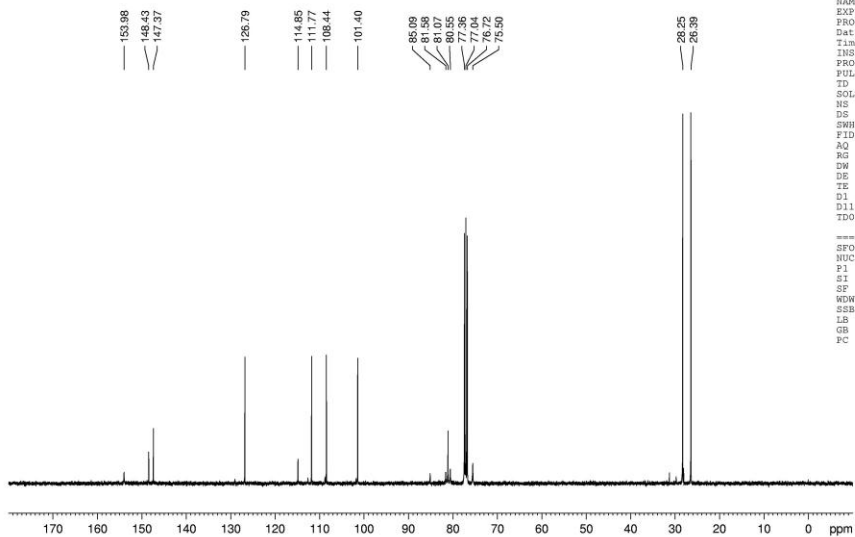

```

NAME      o1d400M
EXPNO     159
PROCNO    1
Date_     20210127
Time      16.38
INSTRUM   spect
PROBHD    5 mm PABBO BB/
PULPROG   zgpg30
TD         65536
FIDRES    0.385323 Hz
RG         1.2976639 sec
AQ         195.85
DE         6.50 usec
TE         293.1 K
D1         2.0000000 sec
D11        0.0300000 sec
D12        0
D13        0
D14        0
D15        0
D16        0
D17        0
D18        0
D19        0
D20        0
D21        0
D22        0
D23        0
D24        0
D25        0
D26        0
D27        0
D28        0
D29        0
D30        0
D31        0
D32        0
D33        0
D34        0
D35        0
D36        0
D37        0
D38        0
D39        0
D40        0
D41        0
D42        0
D43        0
D44        0
D45        0
D46        0
D47        0
D48        0
D49        0
D50        0
D51        0
D52        0
D53        0
D54        0
D55        0
D56        0
D57        0
D58        0
D59        0
D60        0
D61        0
D62        0
D63        0
D64        0
D65        0
D66        0
D67        0
D68        0
D69        0
D70        0
D71        0
D72        0
D73        0
D74        0
D75        0
D76        0
D77        0
D78        0
D79        0
D80        0
D81        0
D82        0
D83        0
D84        0
D85        0
D86        0
D87        0
D88        0
D89        0
D90        0
D91        0
D92        0
D93        0
D94        0
D95        0
D96        0
D97        0
D98        0
D99        0
D100       0
===== CHANNEL f1 =====
SFO1      100.6283629 MHz
NUC1      13C
P1         10.50 usec
PL1       0.00 dB
RF         100.6177980 MHz
WDW        EM
SSB        0
LB         1.00 Hz
GB         0
PC         1.40
  
```

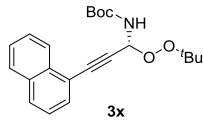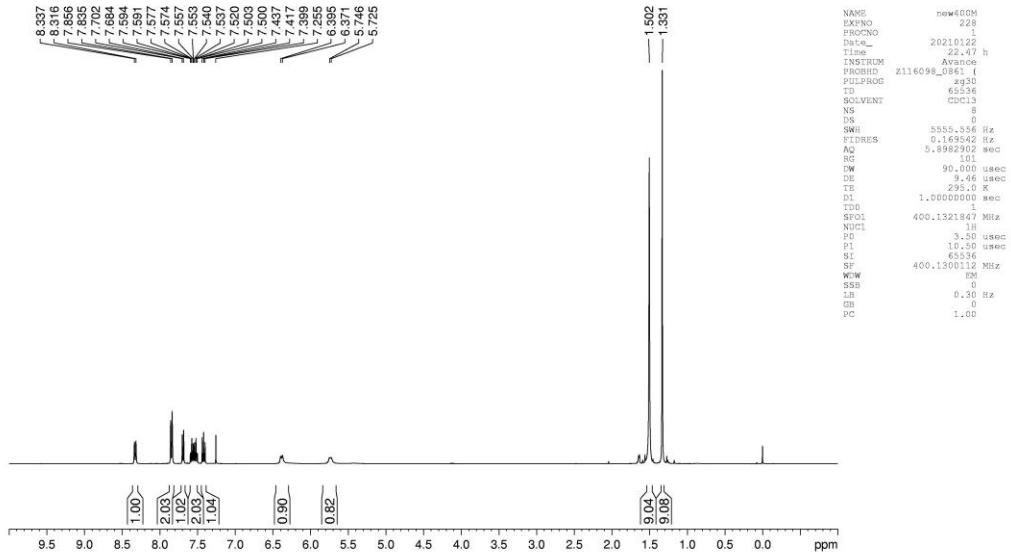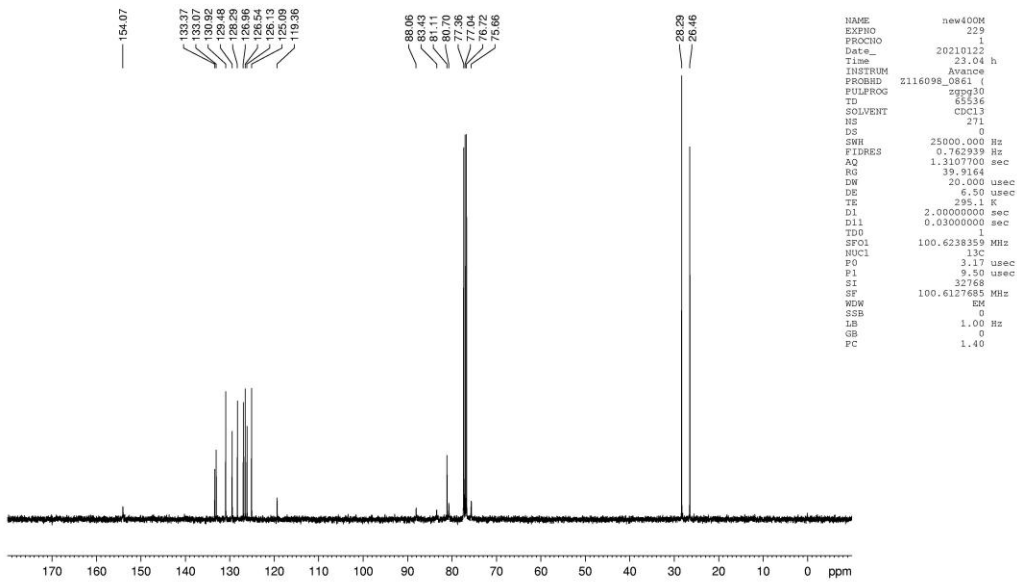

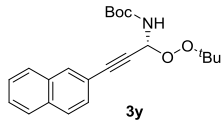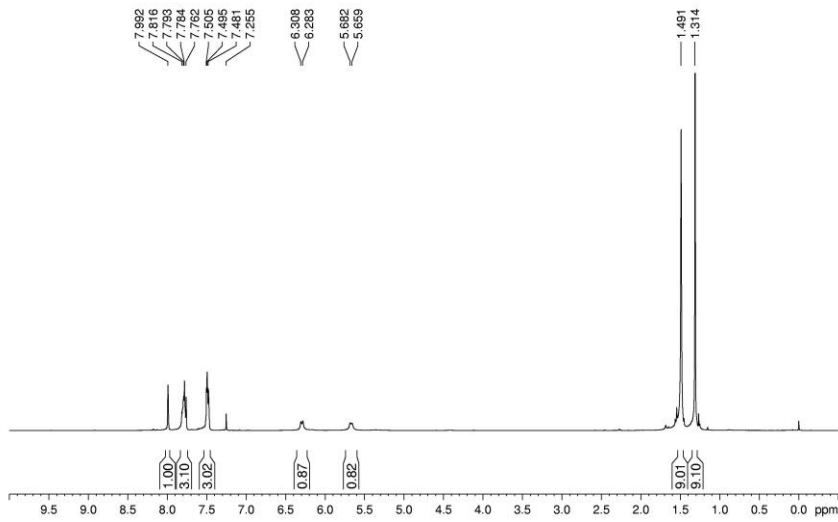

```

NAME      old400M
EXPNO    154
PROCNO   1
Date_    20210126
Time     18.41
INSTRUM spect
PROBHD   5 mm PABBO BB/
PULPROG zg30
TD       65536
SOLVENT  CDCl3
NS       8
DS       0
SWH      8012.820 Hz
FIDRES   0.122266 Hz
AQ       4.1039466 sec
RG       31.56
DM       62.400 usec
DE       6.50 usec
TE       292.3 K
D1       1.00000000 sec
TDO      1
  
```

===== CHANNEL f1 =====

```

SF01     400.1522008 MHz
NUC1     1H
P1       10.75 usec
SI       65536
SF       400.1500121 MHz
WWM      EM
SSB      0
LB       0.30 Hz
GB       0
PC       1.00
  
```

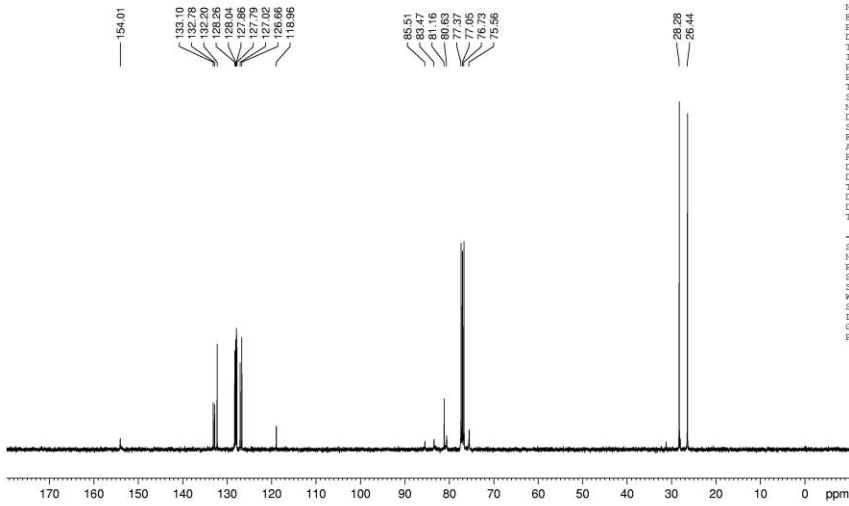

```

NAME      old400M
EXPNO    155
PROCNO   1
Date_    20210126
Time     18.48
INSTRUM spect
PROBHD   5 mm PABBO BB/
PULPROG zgpg30
TD       65536
SOLVENT  CDCl3
NS       35
DS       0
SWH      25252.525 Hz
FIDRES   0.385323 Hz
AQ       1.2976629 sec
RG       195.85
DM       19.800 usec
DE       6.50 usec
TE       293.1 K
D1       2.00000000 sec
D11      0.03000000 sec
TDO      1
  
```

===== CHANNEL f1 =====

```

SF01     100.6283629 MHz
NUC1     13C
P1       10.50 usec
SI       32768
SF       100.6177980 MHz
WWM      EM
SSB      0
LB       1.00 Hz
GB       0
PC       1.40
  
```

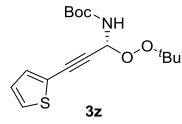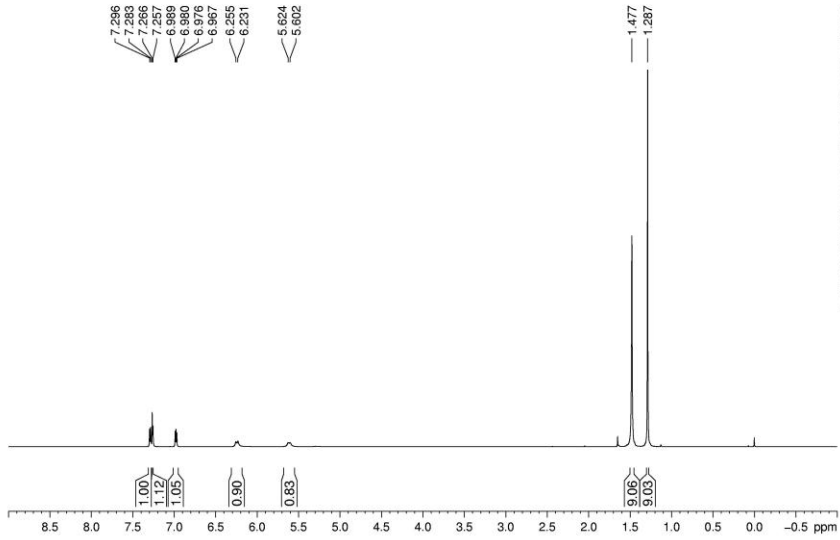

```

NAME      new400M
EXPNO    211
PROCNO   1
Date_    20210116
Time     23.19 h
INSTRUM  Avance
PROBHD   Z116098_0861 (
PULPROG  zgpg30
TD       65536
SOLVENT  CDCl3
NS       8
DS       0
SWE      5555.556 Hz
FIDRES   0.169542 Hz
AQ       5.8982902 sec
RG       101
DW       90.000 usec
DE       9.46 usec
TE       294.0 K
D1       1.00000000 sec
TDO      1
SFO1     400.1521847 MHz
NUC1     1H
PQ       3.50 usec
P1       10.50 usec
SI       65536
SF       400.1506072 MHz
WDW      EM
SBB      0
LB       0.30 Hz
GB       0
PC       1.00
  
```

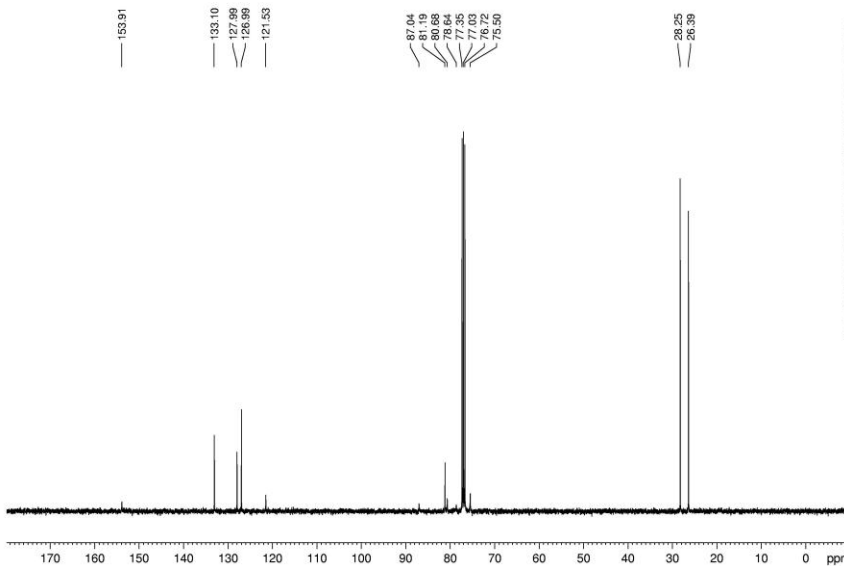

```

NAME      new400M
EXPNO    212
PROCNO   1
Date_    20210116
Time     23.39 h
INSTRUM  Avance
PROBHD   Z116098_0861 (
PULPROG  zgpg30
TD       65536
SOLVENT  CDCl3
NS       546
DS       0
SWE      25000.000 Hz
FIDRES   0.762939 Hz
AQ       1.3107700 sec
RG       24.0057
DW       20.000 usec
DE       6.50 usec
TE       294.2 K
D1       2.00000000 sec
D11      0.103000000 sec
TDO      1
SFO1     100.6283815 MHz
NUC1     13C
PQ       3.17 usec
P1       9.50 usec
SI       32768
SF       100.6127685 MHz
WDW      EM
SBB      0
LB       1.00 Hz
GB       0
PC       1.40
  
```



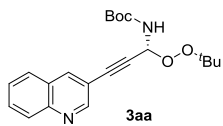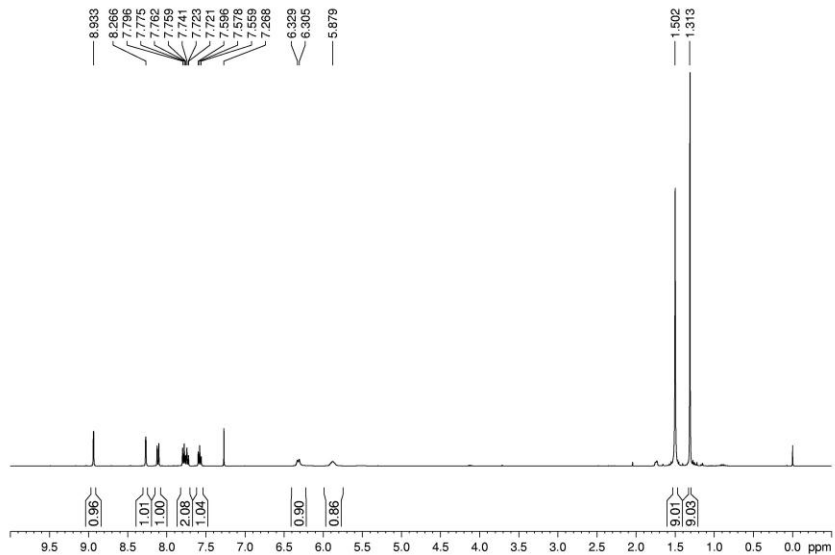

```

NAME      o1d400M
EXPNO    171
PROCNO   1
Date_    20210310
Time     2.40
INSTRUM  spect
PROBHD   5 mm PABBO BB/
PULPROG  zgpg30
TD       65536
SOLVENT  CDCl3
NS       5
DS       0
SWH      8012.820 Hz
FIDRES   0.122266 Hz
AQ       4.0894966 sec
RG       71.53
DW       62.400 usec
DE       6.50 usec
TE       295.0 K
D1       1.00000000 sec
TDD      1

===== CHANNEL f1 =====
SF01    400.1522008 MHz
NUC1     13
P1       10.75 usec
SI       65536
SF       400.1500064 MHz
WDW      EM
SSB      0
LB       0.30 Hz
GB       0
PC       1.00

```

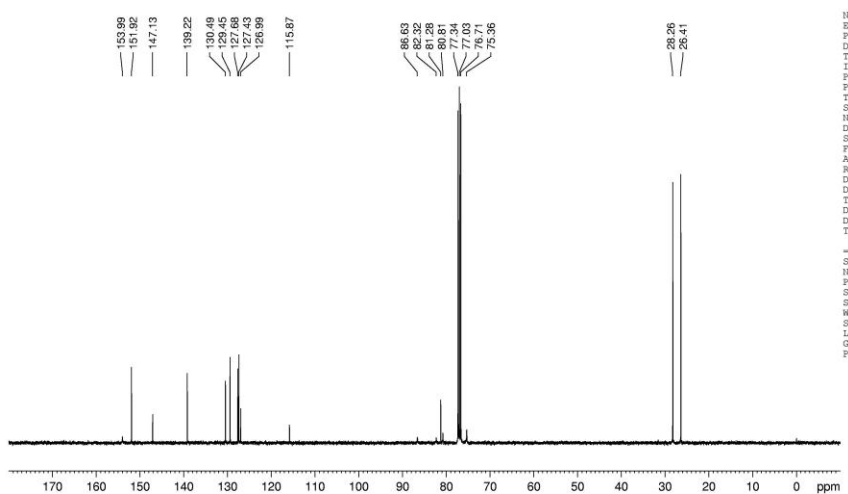

```

NAME      o1d400M
EXPNO    172
PROCNO   1
Date_    20210310
Time     3.26
INSTRUM  spect
PROBHD   5 mm PABBO BB/
PULPROG  zgpg30
TD       65536
SOLVENT  CDCl3
NS       800
DS       0
SWH      25252.525 Hz
FIDRES   0.385323 Hz
AQ       1.2976629 sec
RG       195.85
DW       19.800 usec
DE       6.50 usec
TE       295.0 K
D1       2.00000000 sec
D11      0.03000000 sec
TDD      1

===== CHANNEL f1 =====
SF01    100.6283629 MHz
NUC1     13C
P1       10.50 usec
SI       32768
SF       100.6177980 MHz
WDW      EM
SSB      0
LB       1.00 Hz
GB       0
PC       1.40

```

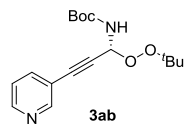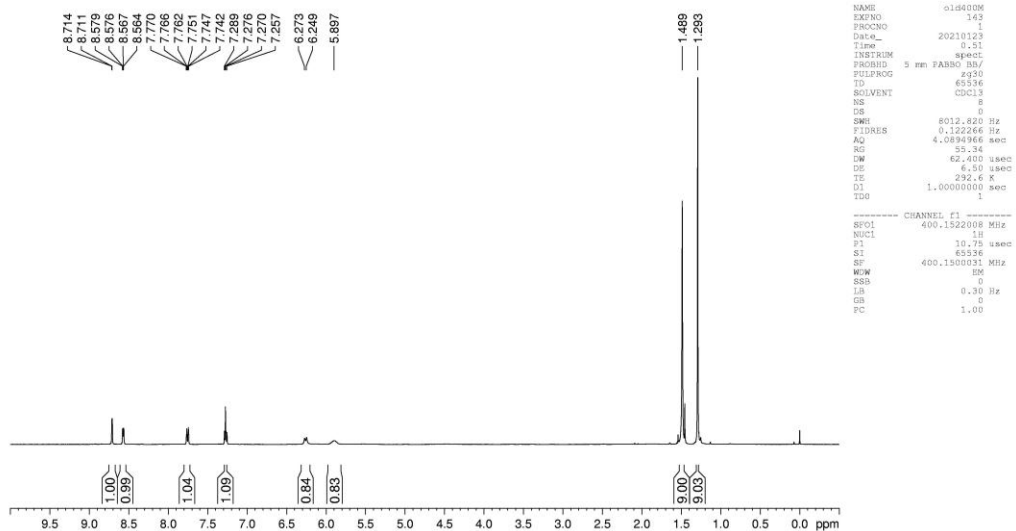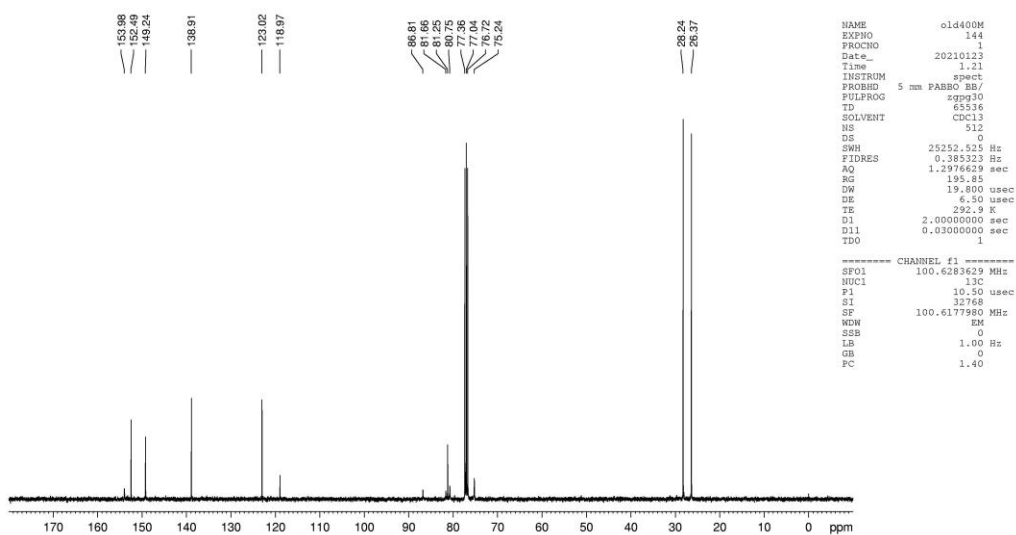

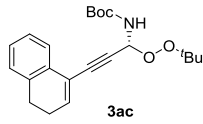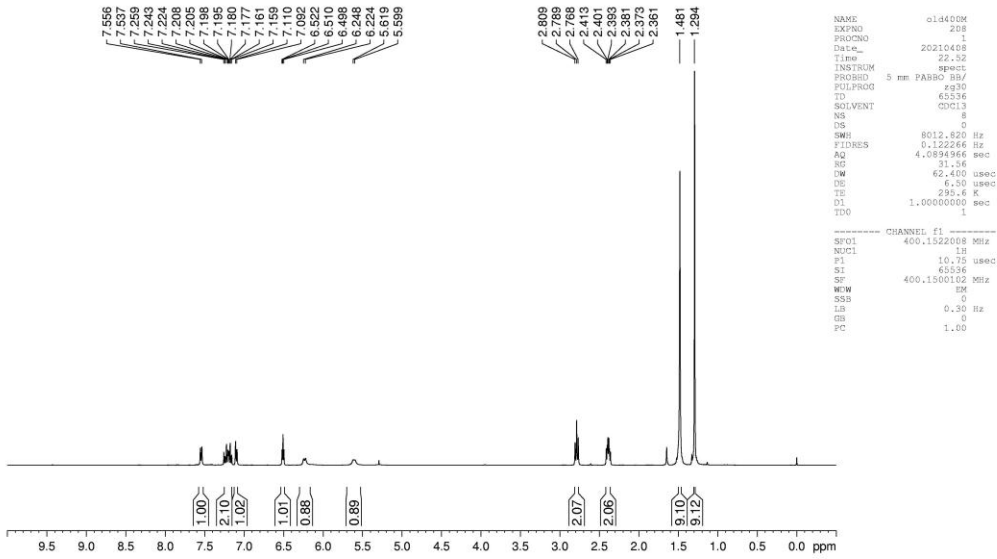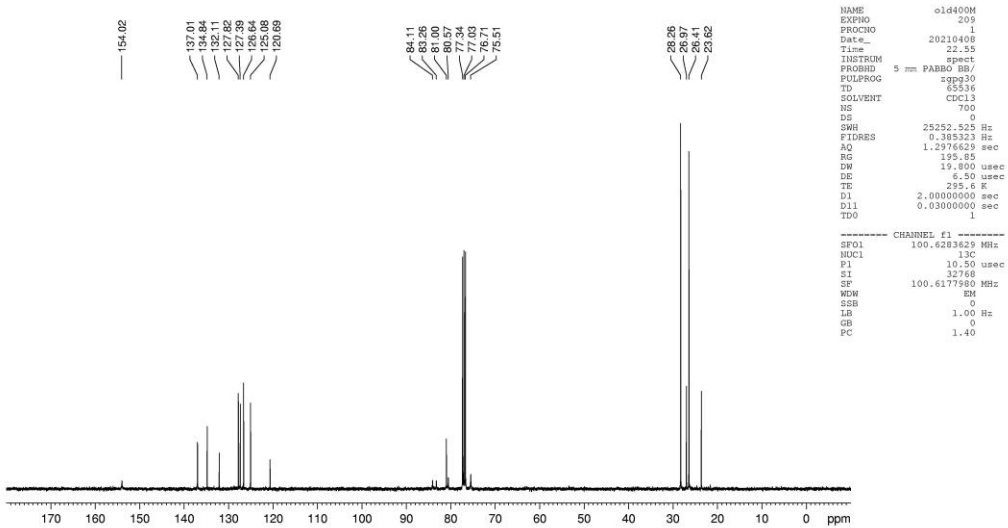

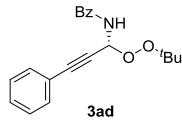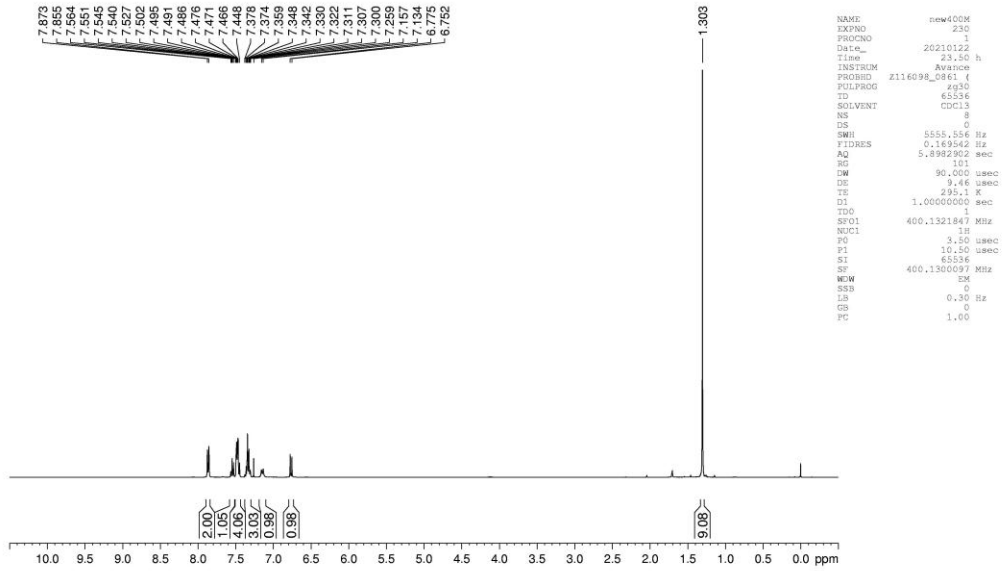

```

NAME      new400M
EXPNO     230
PROCNO    1
Date_     20210122
Time      23.50 h
INSTRUM   Avance
PROBHD    Z116098_0861 (
PULPROG   zgpg30
TD         65536
SOLVENT   CDCl3
NS         8
DS         0
SWH        5555.556 Hz
FIDRES     0.169542 Hz
AQ         5.8982902 sec
RG         101
DE         90.000 usec
TE         295.1 K
D1         1.00000000 sec
TD0        1
SF01       400.1321847 MHz
NUC1       1H
PC         3.50 usec
PI         10.50 usec
SI         65536
SF         400.1300097 MHz
WEN        EM
SSB        0
LB         0.30 Hz
GB         0
PC         1.00
  
```

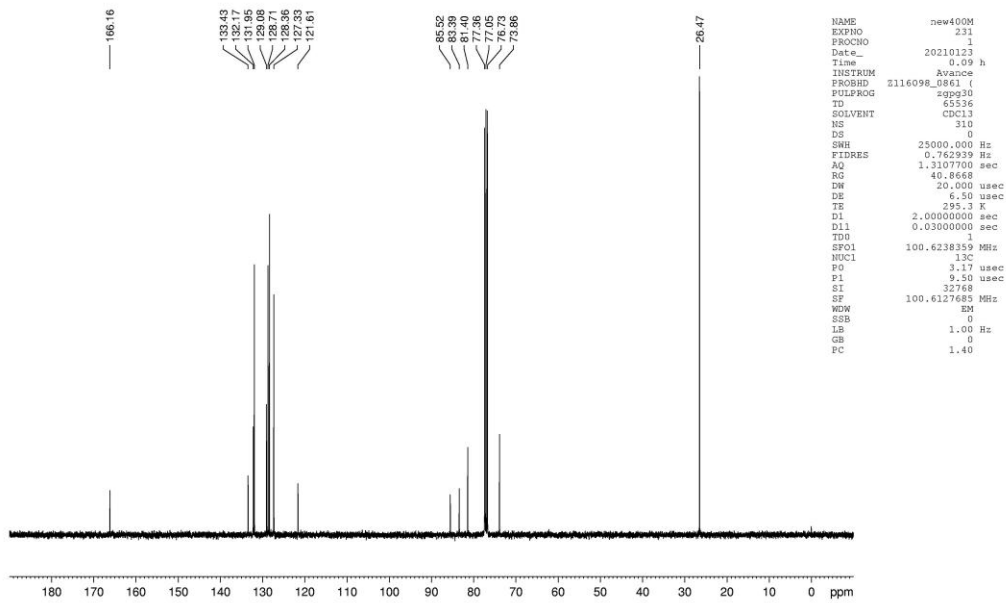

```

NAME      new400M
EXPNO     231
PROCNO    1
Date_     20210123
Time      0.09 h
INSTRUM   Avance
PROBHD    Z116098_0861 (
PULPROG   zgpg30
TD         65536
SOLVENT   CDCl3
NS         310
DS         0
SWH        25000.000 Hz
FIDRES     0.762939 Hz
AQ         1.3107700 sec
RG         40.8668
DE         20.000 usec
TE         295.3 K
D1         0.03000000 sec
D11        1
TD0        1
SF01       100.6238359 MHz
NUC1       13C
PC         3.17 usec
PI         9.50 usec
SI         32768
SF         100.6127685 MHz
WEN        EM
SSB        0
LB         1.00 Hz
GB         0
PC         1.40
  
```

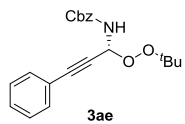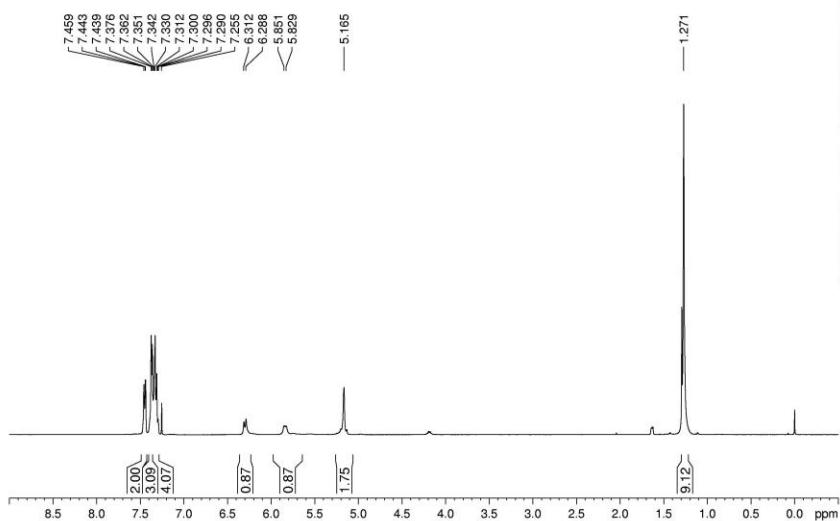

```

NAME      old400M
EXPNO    135
PROCNO   1
Date_    20210123
Time     0.17
INSTRUM  spect
PROBHD   5 mm PABBO BBI
PULPROG  zg30
TD       65536
SOLVENT  CDCl3
NS       8
DS       0
SWH      8012.820 Hz
FIDRES   0.122266 Hz
AQ       4.0894966 sec
RG       35.34
DW       62.400 usec
DE       6.50 usec
TE       292.6 K
D1       1.00000000 sec
TD0      1
----- CHANNEL f1 -----
SFO1     400.1520000 MHz
NUC1     1H
P1       10.35 usec
SI       65536
SF       400.1500116 MHz
WDW      EM
SBB      0
LB       0.30 Hz
GB       0
PC       1.00
  
```

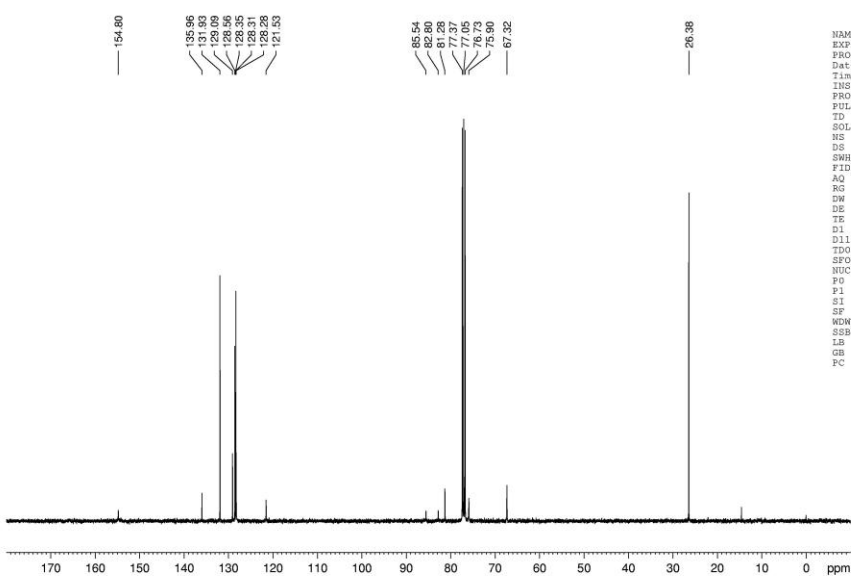

```

NAME      new400M
EXPNO    217
PROCNO   1
Date_    20210117
Time     0.50 h
INSTRUM  Avance
PROBHD   Z116098_0861 (
PULPROG  zgpg30
TD       65536
SOLVENT  CDCl3
NS       512
DS       0
SWH      25000.000 Hz
FIDRES   0.762939 Hz
AQ       1.3107700 sec
RG       39.9164
DW       20.000 usec
DE       6.50 usec
TE       294.5 K
D1       2.00000000 sec
D11      0.03000000 sec
TD0      1
SFO1     100.6238359 MHz
NUC1     13C
P1       3.17 usec
SI       32768
SF       100.6127685 MHz
WDW      EM
SBB      0
LB       1.00 Hz
GB       0
PC       1.40
  
```

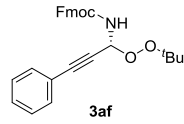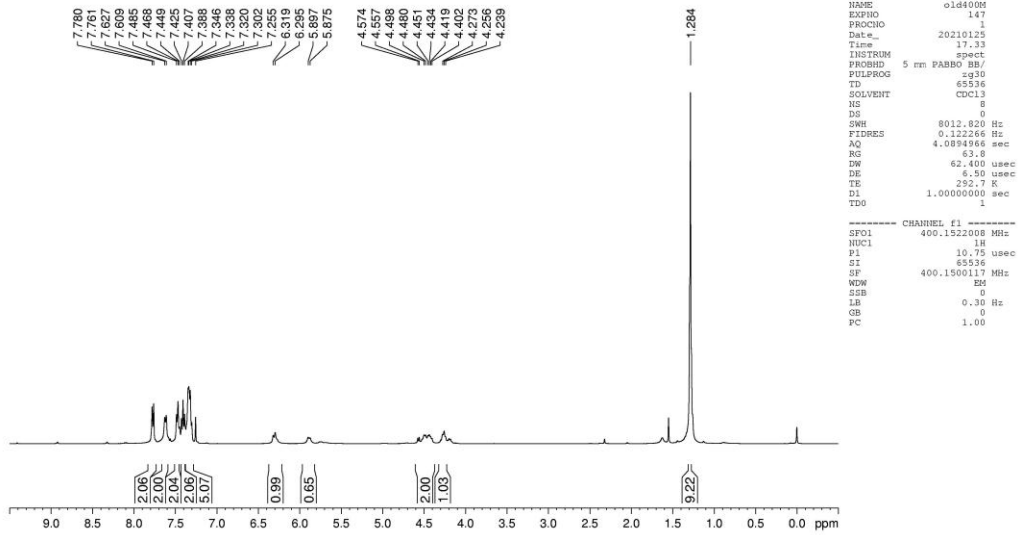

```

NAME          old400M
EXPNO         147
PROCNO        1
Date_         20210125
Time         17.33
INSTRUM       spect
PROBHD        5 mm PABBO BB/
PULPROG       zg30
TD            65536
SOLVENT       CDCl3
NS            8
DS            0
SWH           8012.820 Hz
FIDRES        0.122266 Hz
AQ           4.089496 sec
RG            63.8
DW           62.400 usec
DE           6.50 usec
TE           292.7 K
D1           1.0000000 sec
TDO          1
----- CHANNEL f1 -----
SF01          400.1522008 MHz
NUC1          1H
P1           10.75 usec
SI           65536
SF           400.1500117 MHz
WDW          EM
SSB          0
LB           0.30 Hz
GB           0
PC           1.00
  
```

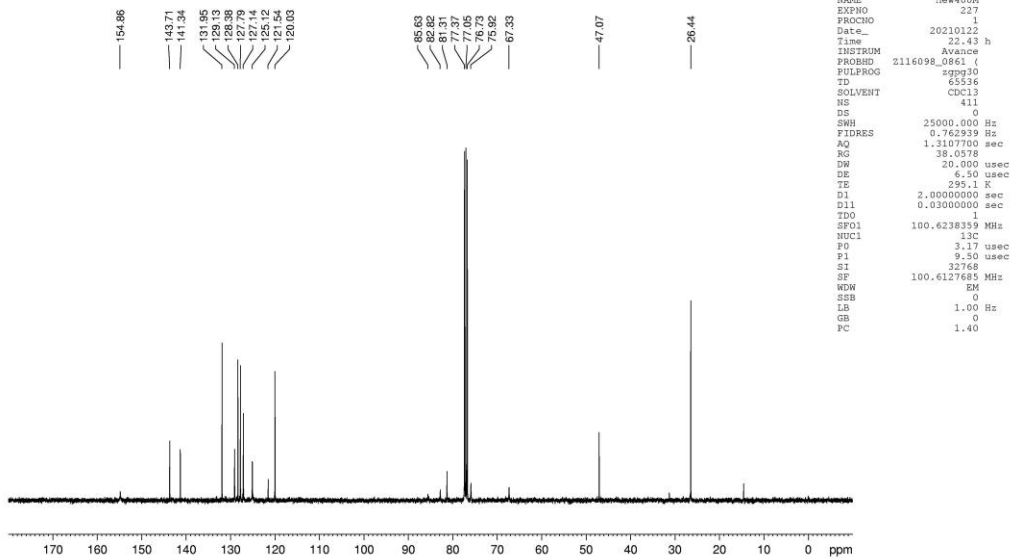

```

NAME          new400M
EXPNO         227
PROCNO        1
Date_         20210122
Time         22.43 h
INSTRUM       Avance
PROBHD        Z116098_0861 (
PULPROG       zgpg30
TD            65536
SOLVENT       CDCl3
NS            411
DS            0
SWH           25000.000 Hz
FIDRES        0.762939 Hz
AQ           1.3107700 sec
RG            38.0378
DW           20.000 usec
DE           6.50 usec
TE           295.1 K
D1           2.0000000 sec
D11          0.0300000 sec
TDO          1
SF01          100.6238359 MHz
NUC1          13C
P0           3.17 usec
P1           9.50 usec
SI           32768
SF           100.6127482 MHz
WDW          EM
SSB          0
LB           1.00 Hz
GB           0
PC           1.40
  
```

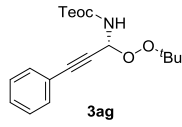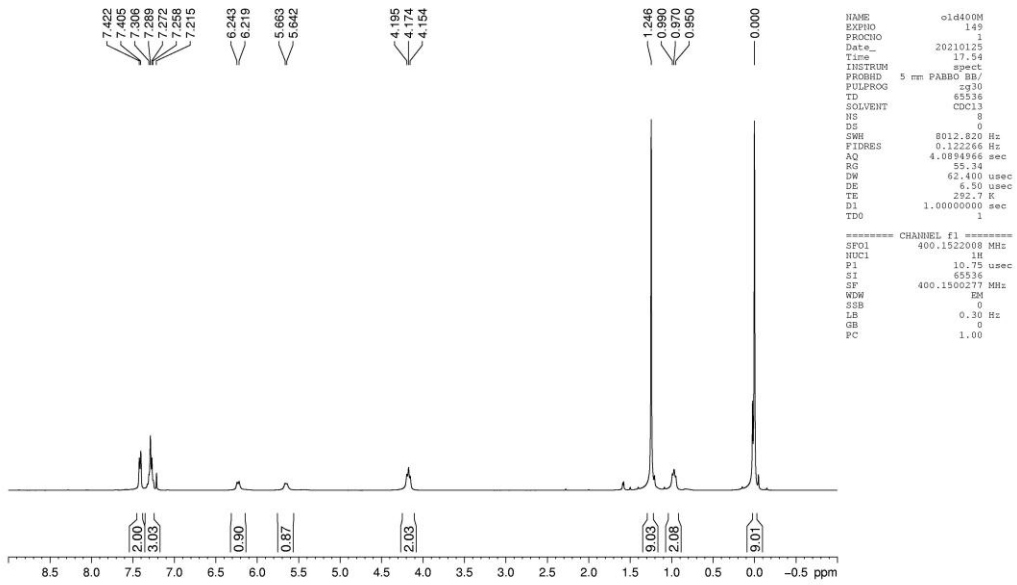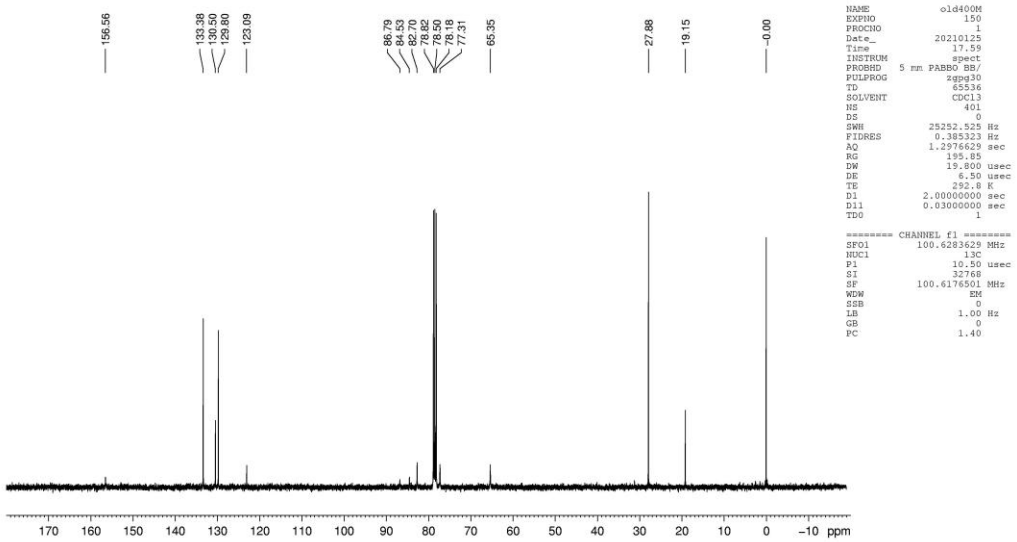

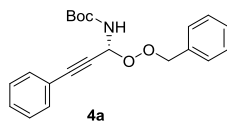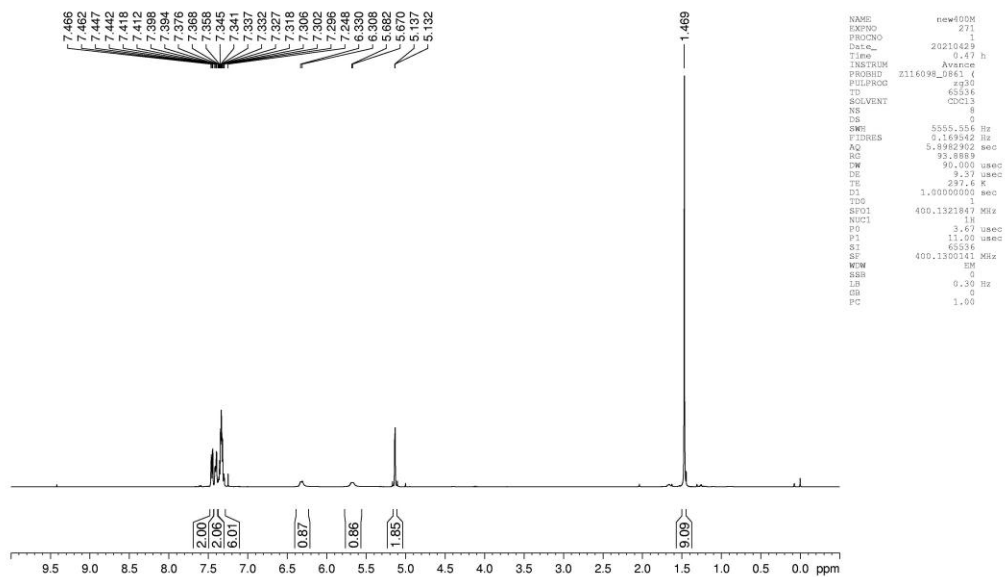

```

NAME      new400M
EXPNO    271
PROCNO   1
Date_    20210429
Time     0.47 h
INSTRUM  Avance
PROBHD   Z116098_0861 (
PULPROG  zgpg30
TD        65536
SOLVENT  CDCl3
NS        8
DS        8
SWH       5555.556 Hz
FIDRES   0.169542 Hz
AQ        5.8982402 sec
RG        93.8889
DM        30.000 usec
DE        9.37 usec
TE        297.4 K
D1        1.00000000 sec
TDS
SFO1     400.1321847 MHz
NUC1     13C
PD        3.67 usec
PT        11.00 usec
SI        62536
SF        400.1300141 MHz
WGM      EM
SSB       0
LB        0.30 Hz
GB        0
PC        1.00
  
```

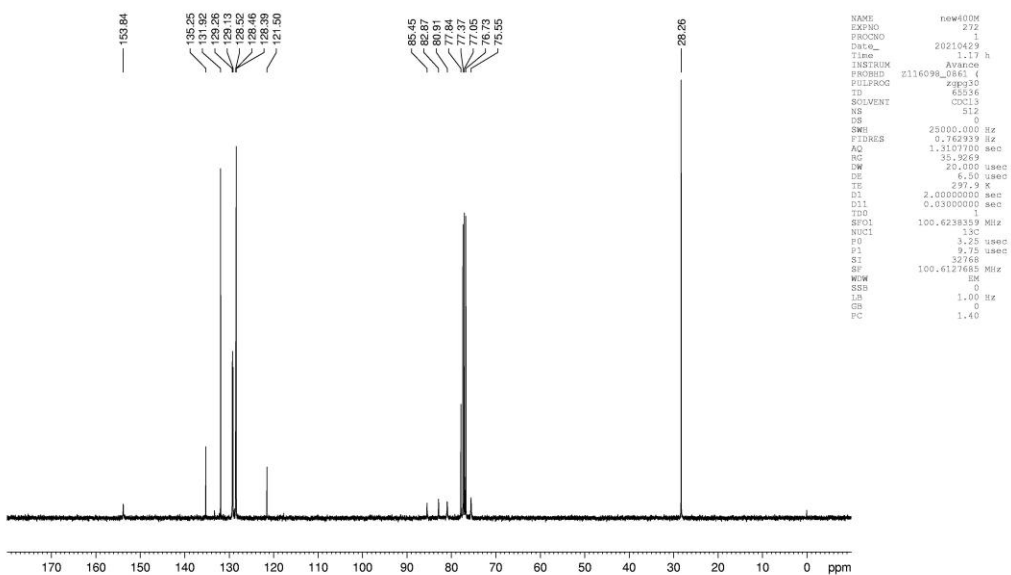

```

NAME      new400M
EXPNO    272
PROCNO   1
Date_    20210429
Time     1.17 h
INSTRUM  Avance
PROBHD   Z116098_0861 (
PULPROG  zgpg30
TD        65536
SOLVENT  CDCl3
NS        8
DS        8
SWH       25000.000 Hz
FIDRES   0.762939 Hz
AQ        1.310700 sec
RG        35.9669
DM        20.000 usec
DE        5.50 usec
TE        297.4 K
D1        2.00000000 sec
D11       0.03000000 sec
TDS
SFO1     100.6238359 MHz
NUC1     13C
PD        3.25 usec
PT        9.75 usec
SI        52768
SF        100.6127685 MHz
WGM      EM
SSB       0
LB        1.00 Hz
GB        0
PC        1.40
  
```



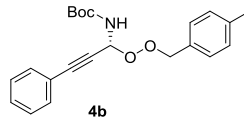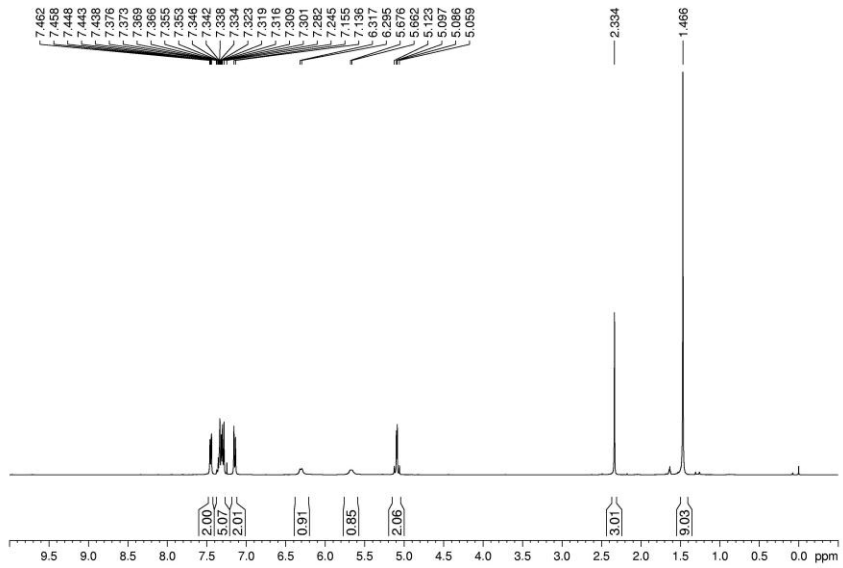

```

NAME          new400M
EXPNO         273
PROCNO        1
Date_         20210429
Time          1.21 h
INSTRUM       Avance
PROBHD        Z116098_0861 (
PULPROG       zgpg30
TD            65536
SOLVENT       CDCl3
NS            8
DS            0
SWH           5555.596 Hz
FIDRES        0.169542 Hz
AQ            3.8983902 sec
RG            69.3333
DW            90.000 usec
DE            9.37 usec
TE            297.7 K
D1            1.00000000 sec
TDO           1
SFO1          400.1321847 MHz
NUC1           1H
P0            3.67 usec
P1            11.00 usec
S1            65536
SF            400.1300154 MHz
WDW           EM
SSB           0
LB            0.30 Hz
GB            0
PC            1.00
  
```

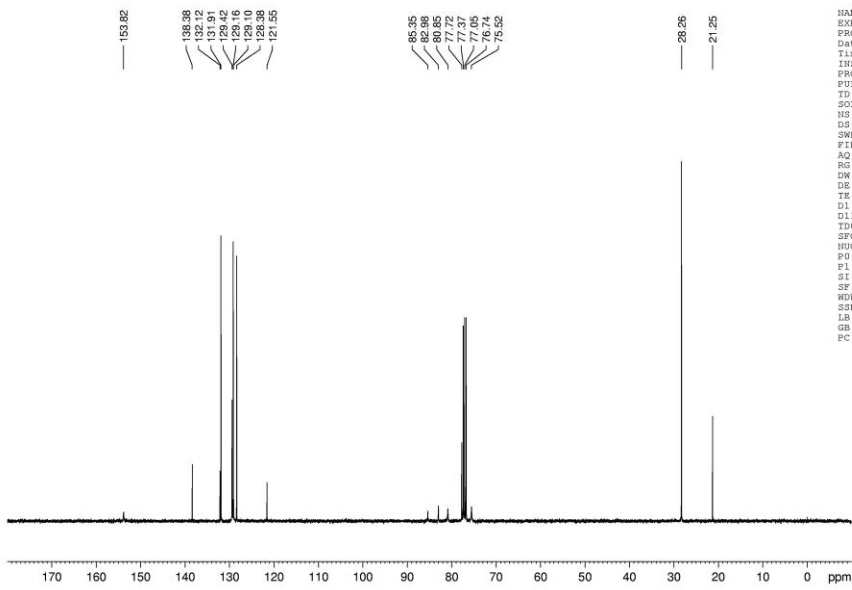

```

NAME          new400M
EXPNO         274
PROCNO        1
Date_         20210429
Time          1.51 h
INSTRUM       Avance
PROBHD        Z116098_0861 (
PULPROG       zgpg30
TD            65536
SOLVENT       CDCl3
NS            8
DS            0
SWH           25000.000 Hz
FIDRES        0.762939 Hz
AQ            1.1107700 sec
RG            35.0287
DW            20.000 usec
DE            6.50 usec
TE            298.1 K
D1            2.00000000 sec
D11           0.03000000 sec
TDO           1
SFO1          100.6238359 MHz
NUC1           13C
P0            3.25 usec
P1            9.75 usec
S1            32768
SF            100.6127685 MHz
WDW           EM
SSB           0
LB            1.00 Hz
GB            0
PC            1.40
  
```

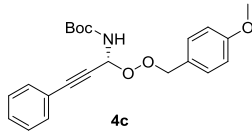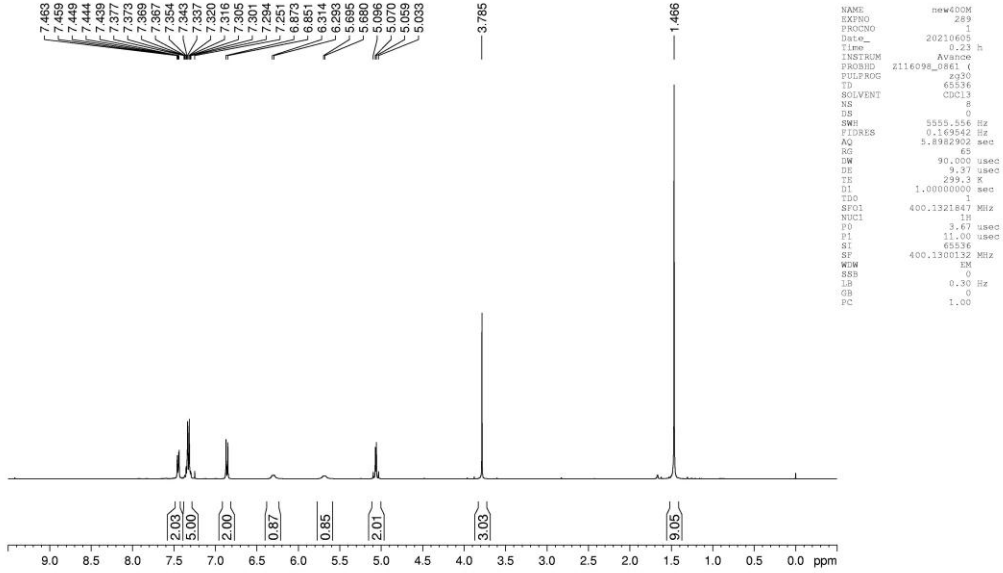

```

NAME      new400M
EXPNO    1
PROCNO   289
PROCNO   289
Date_    20210605
Time     0.23 h
INSTRUM  Avance
PROBHD   Z116098_0861 (
PULPROG  zg30
TD        65536
SOLVENT  CDCl3
NS        8
DS        0
SWH       555.256 Hz
FIDRES    0.169542 Hz
AQ        5.8982902 sec
RG        65
DW        90.000 usec
DE        9.37 usec
TE        299.3 K
D1        1.0000000 sec
TD0       1
SF01      400.1321847 MHz
NUC1      1H
P0        3.67 usec
P1        11.00 usec
SI        65536
SF        400.1300132 MHz
WDW       EM
SSB       0
LB        0.50 Hz
GB        0
PC        1.00
  
```

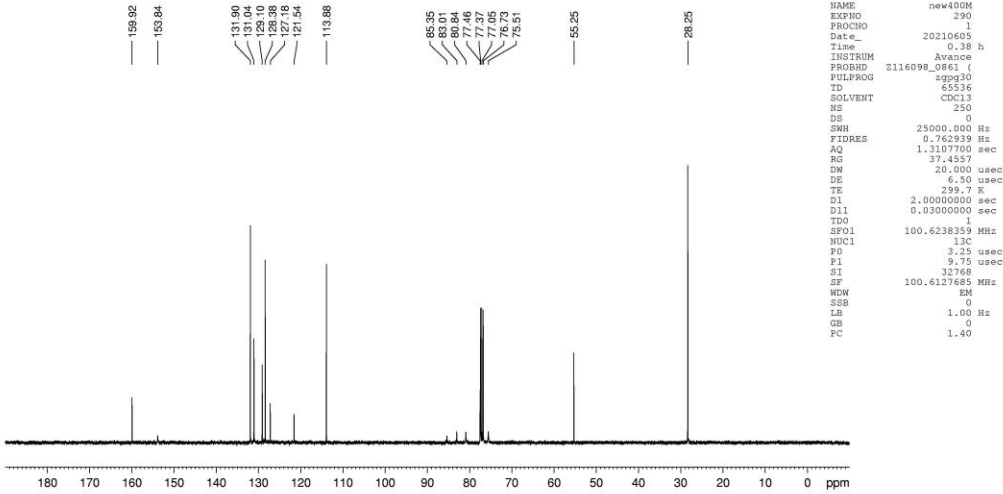

```

NAME      new400M
EXPNO    1
PROCNO   290
PROCNO   290
Date_    20210605
Time     0.38 h
INSTRUM  Avance
PROBHD   Z116098_0861 (
PULPROG  zgpg30
TD        65536
SOLVENT  CDCl3
NS        250
DS        0
SWH       25000.000 Hz
FIDRES    0.762939 Hz
AQ        1.3107700 sec
RG        37.4537
DW        20.000 usec
DE        6.50 usec
TE        299.7 K
D1        2.0000000 sec
D11       0.0300000 sec
TD0       1
SF01      100.6238359 MHz
NUC1      13C
P0        3.25 usec
P1        9.75 usec
SI        32768
SF        100.6127685 MHz
WDW       EM
SSB       0
LB        1.00 Hz
GB        0
PC        1.40
  
```

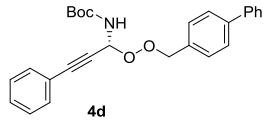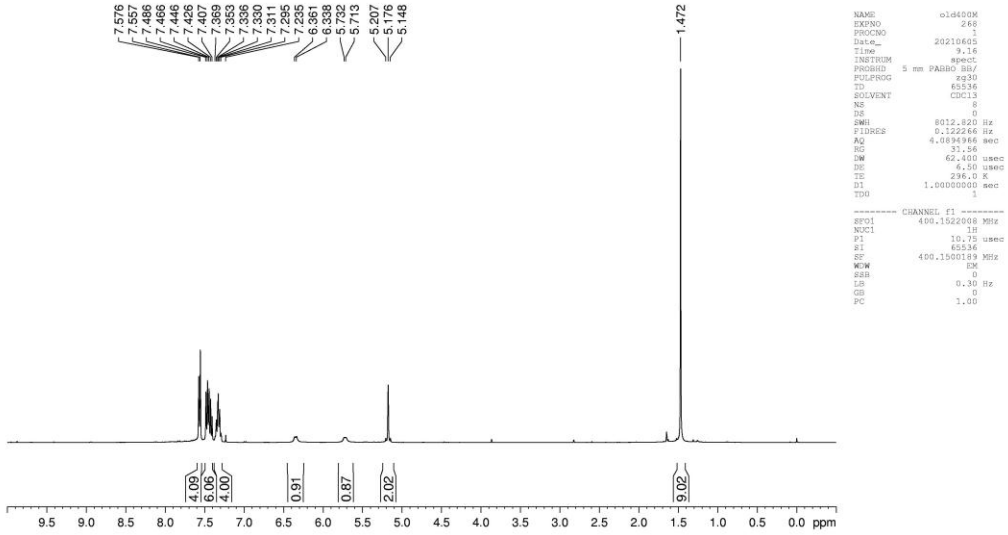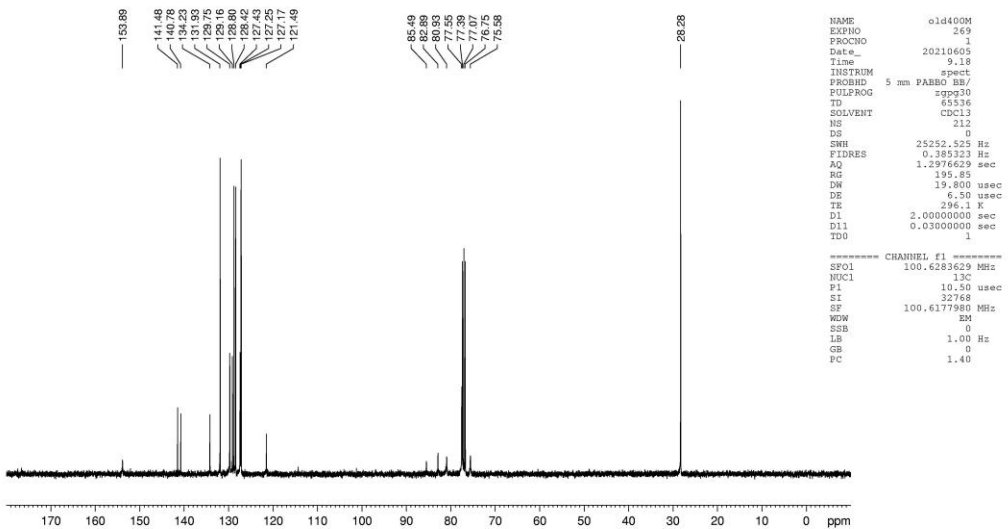

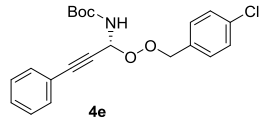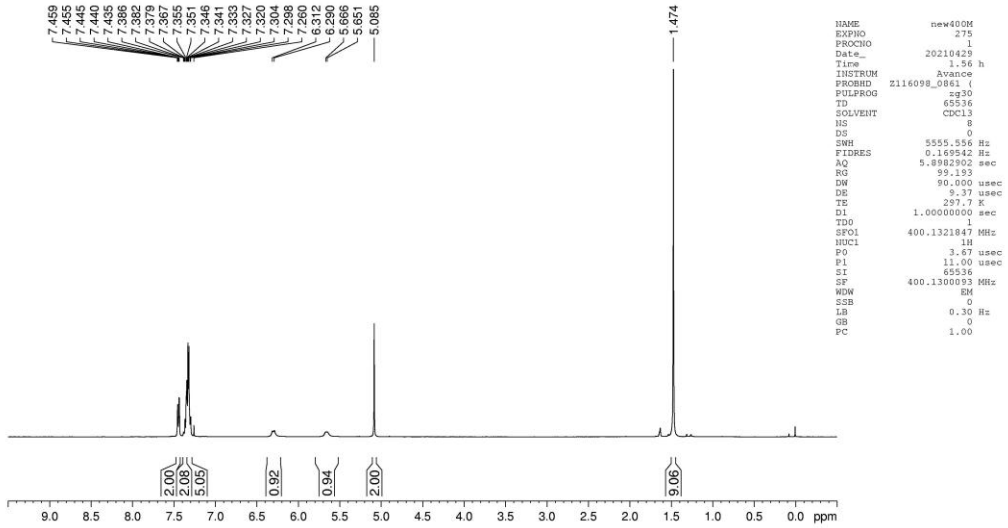

```

NAME          new400M
EXPNO         275
PROCNO        1
Date_         20210429
Time          1.56 h
INSTRUM       Avance
PROBHD        Z116098_0861 (
PULPROG       zg30
TD            65536
SOLVENT       CDCl3
NS            8
DS            0
SWH           5555.556 Hz
FIDRES        0.169942 Hz
AQ            5.8982902 sec
RG            99.193
DN            90.000 usec
DE            9.37 usec
TE            297.7 K
D1            1.00000000 sec
TD0           1
SFO1          400.1321847 MHz
NUC1          1H
PC            3.67 usec
PI            11.00 usec
SI            65536
SF            400.1300093 MHz
WDW           EM
SSB           0
LB            0.30 Hz
GB            0
PC            1.00
  
```

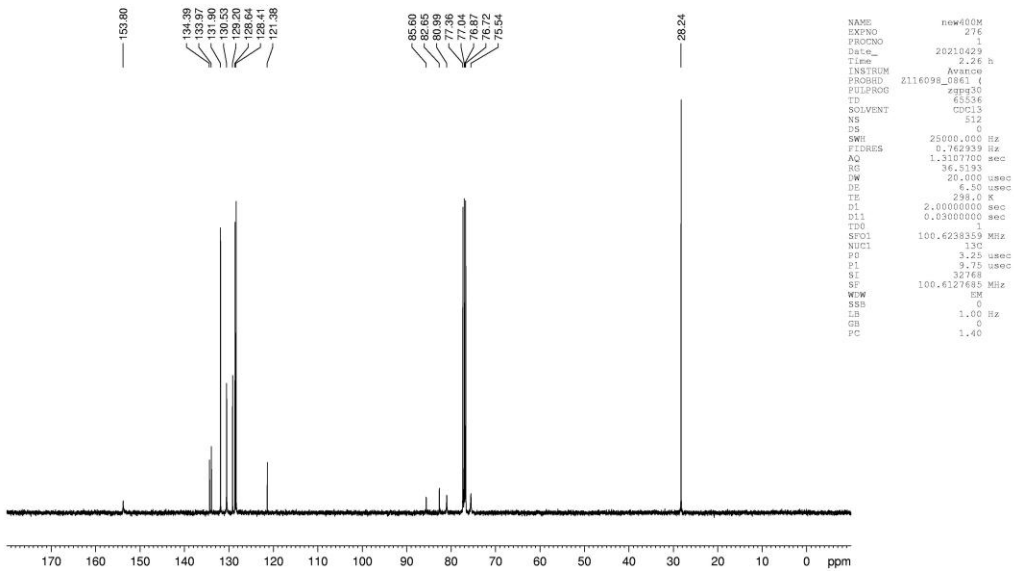

```

NAME          new400M
EXPNO         276
PROCNO        5
Date_         20210429
Time          2.26 h
INSTRUM       Avance
PROBHD        Z116098_0861 (
PULPROG       zgpg30
TD            65536
SOLVENT       CDCl3
NS            512
DS            0
SWH           25000.000 Hz
FIDRES        0.742939 Hz
AQ            1.3107700 sec
RG            36.5193
DN            20.000 usec
DE            6.50 usec
TE            298.0 K
D1            2.00000000 sec
D11           0.03000000 sec
TD0           1
SFO1          100.6238359 MHz
NUC1          13C
PC            19c
PI            9.75 usec
SI            32768
SF            100.6127685 MHz
WDW           EM
SSB           0
LB            1.00 Hz
GB            0
PC            1.40
  
```

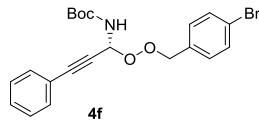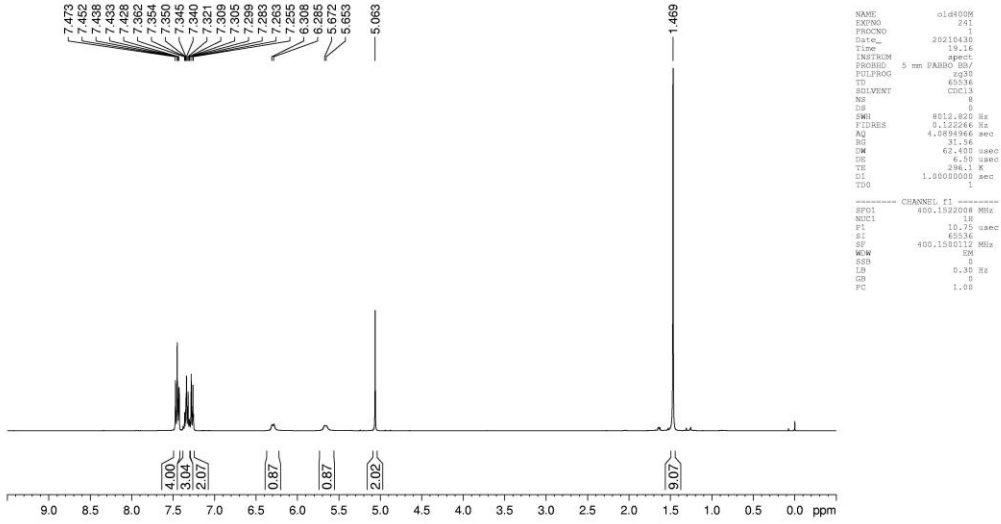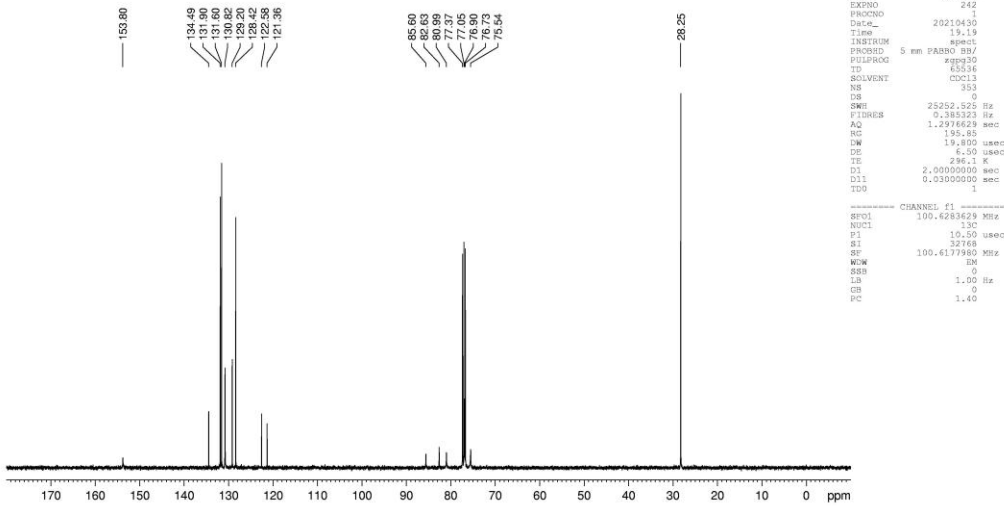

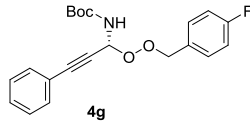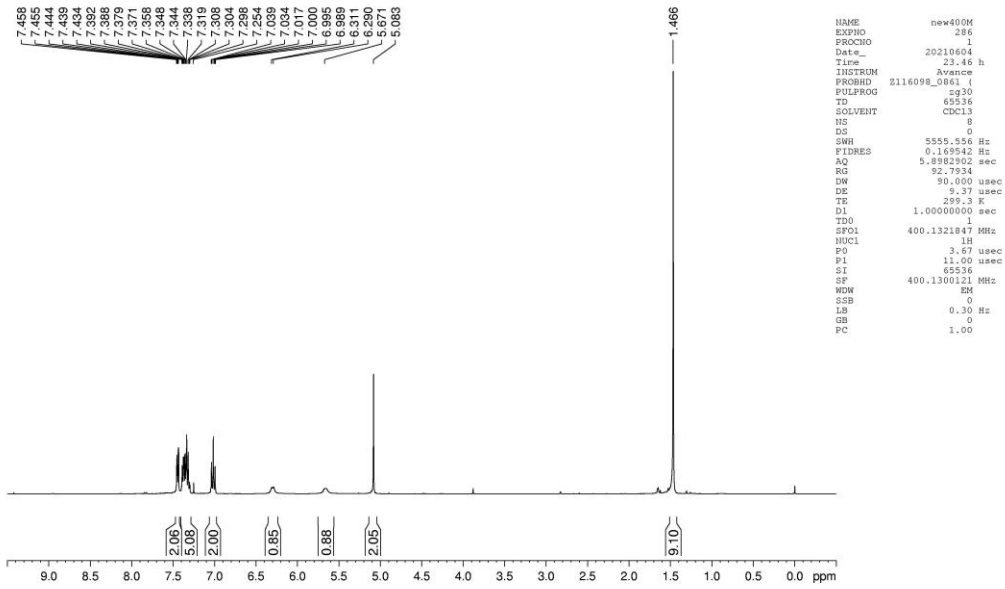

```

NAME          new400M
EXPNO         286
PROCNO       1
Date_         20210604
Time         23.46 h
INSTRUM      Avance
PROBHD       Z116098_0861 (
PULPROG      zg30
TD           65536
SOLVENT      CDCl3
NS           8
DS           0
SWH          5555.556 Hz
FIDRES      0.169542 Hz
AQ          5.8982902 sec
RG          92.7534
DN          90.000 usec
DE          9.37 usec
TE          299.3 K
D1          1.0000000 sec
TD0         1
SFO1        400.1321847 MHz
NUC1         1H
PG          3.67 usec
PI          11.00 usec
SI          65536
SF          400.1300121 MHz
WDW         EM
SSB         0
LB          0.30 Hz
GB          0
PC          1.00
  
```

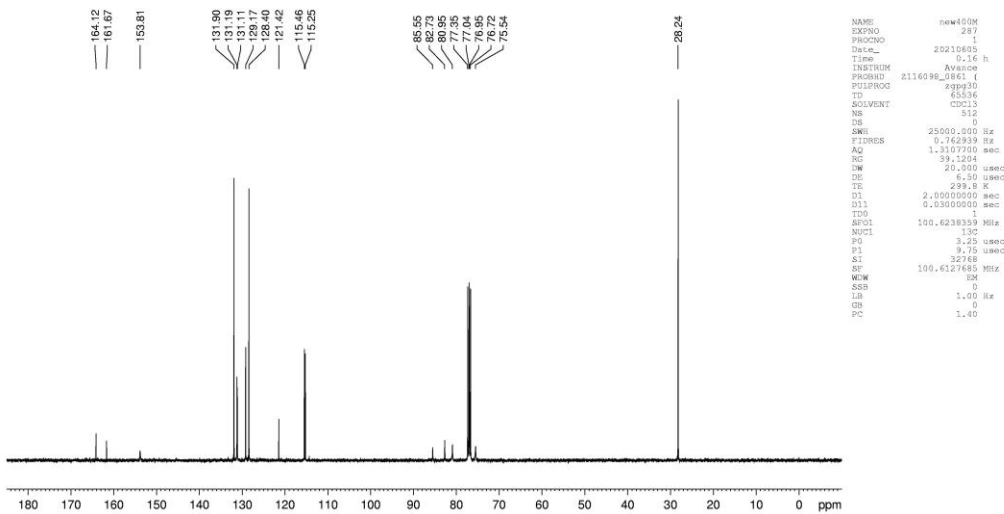

```

NAME          new400M
EXPNO         287
PROCNO       1
Date_         20210605
Time         0.16 h
INSTRUM      Avance
PROBHD       Z116098_0861 (
PULPROG      zgpg30
TD           65536
SOLVENT      CDCl3
NS           512
DS           0
SWH          25000.000 Hz
FIDRES      0.762939 Hz
AQ          1.1107000 sec
RG          39.1204
DN          20.000 usec
DE          6.50 usec
TE          299.8 K
D1          2.0000000 sec
D11         0.0300000 sec
TD0         1
SFO1        100.6238359 MHz
NUC1         13C
PG          3.25 usec
PI          9.75 usec
SI          32768
SF          100.6127685 MHz
WDW         EM
SSB         0
LB          1.00 Hz
GB          0
PC          1.40
  
```

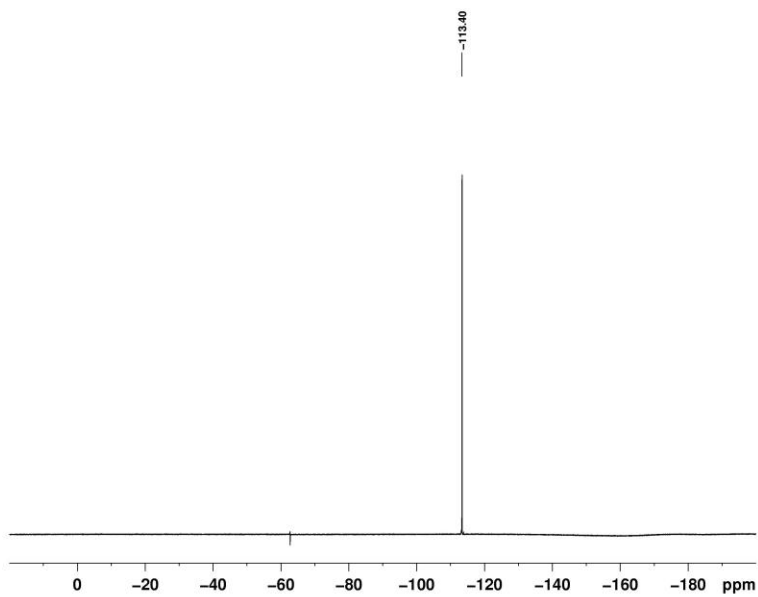

```

NAME          new400M
EXPNO         288
PROCNO        1
Date_         20210605
Time          0.18 h
INSTRUM       Avance
PROBHD        Z116098_0861 (
PULPROG       zgpg
TD            131072
SOLVENT       CDCl3
NS            16
DS            4
SWH           90909.094 Hz
FIDRES        1.387163 Hz
AQ            0.7209460 sec
RG            101
DW            5.500 usec
DE            6.50 usec
TE            299.7 K
D1            1.0000000 sec
D11           0.0300000 sec
TD0           1
SFO1          376.4607164 MHz
NUC1          13F
P1            18.00 usec
SI            65536
SF            376.4983662 MHz
WDW           EM
SSB           0
LB            0.30 Hz
GB            0
PC            1.00

```

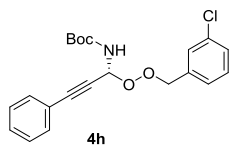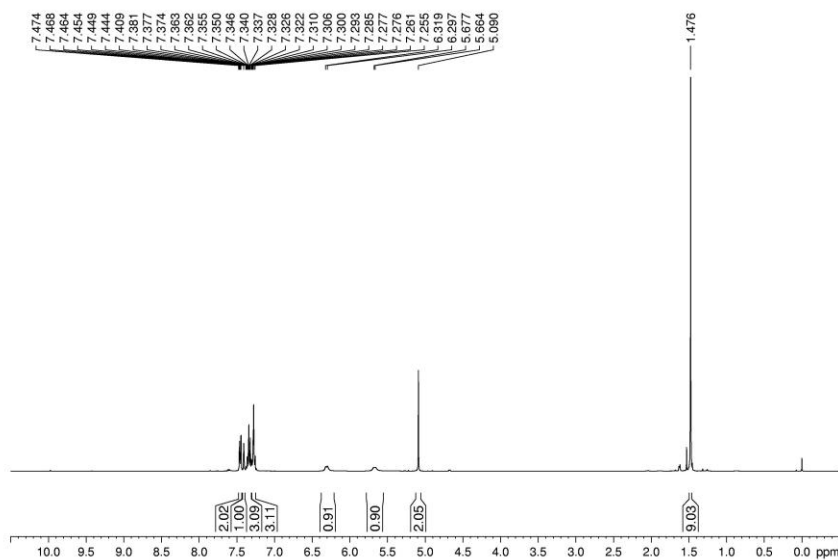

```

NAME      new400M
EXPNO     279
PROCNO    1
Date_     20210517
Time      12.33 h
INSTRUM   Avance
PROBHD    Z116098_0861 (
PULPROG   zgpg30
TD         65536
SOLVENT   CDCl3
NS         8
DS         0
SWE        555.556 Hz
FIDRES    0.169542 Hz
AQ         5.8982902 sec
RG         501
DW         90.000 usec
DE         6.50 usec
TE         299.2 K
D1         1.00000000 sec
TDO        1
SFO1      400.1321847 MHz
NUC1       1H
P1         3.67 usec
S1         11.00 usec
SI         65536
SF         400.1300115 MHz
WDW        EM
SSB        0
LB         0.30 Hz
GB         0
PC         1.00
  
```

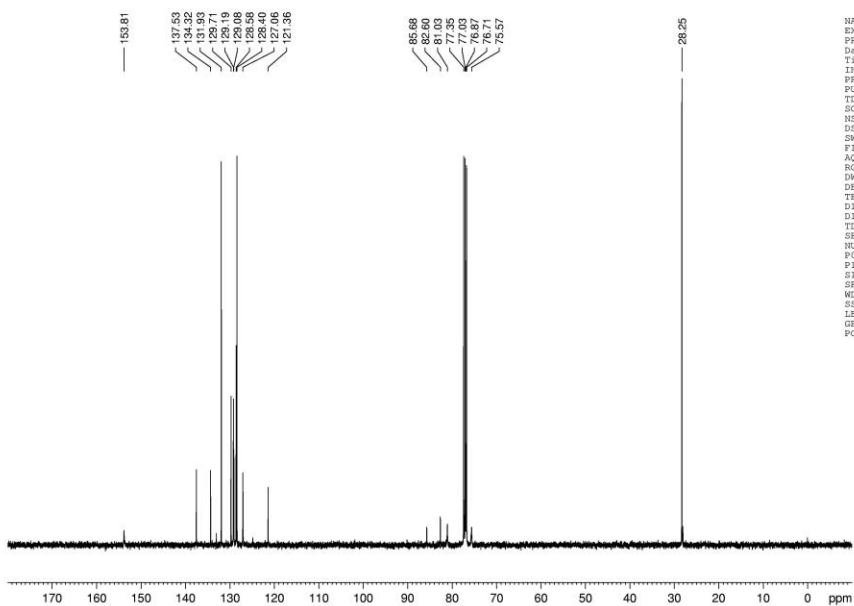

```

NAME      new400M
EXPNO     280
PROCNO    1
Date_     20210517
Time      13.03 h
INSTRUM   Avance
PROBHD    Z116098_0861 (
PULPROG   zgpg30
TD         65536
SOLVENT   CDCl3
NS         512
DS         0
SWE        25000.000 Hz
FIDRES    0.762939 Hz
AQ         1.1107700 sec
RG         34.7803
DW         20.000 usec
DE         6.50 usec
TE         299.5 K
D1         2.00000000 sec
D11        0.03000000 sec
TDO        1
SFO1      100.6238359 MHz
NUC1       13C
P1         3.25 usec
S1         9.75 usec
SI         32768
SF         100.6127689 MHz
WDW        EM
SSB        0
LB         1.00 Hz
GB         0
PC         1.40
  
```



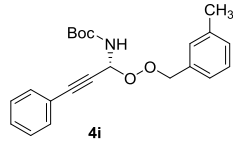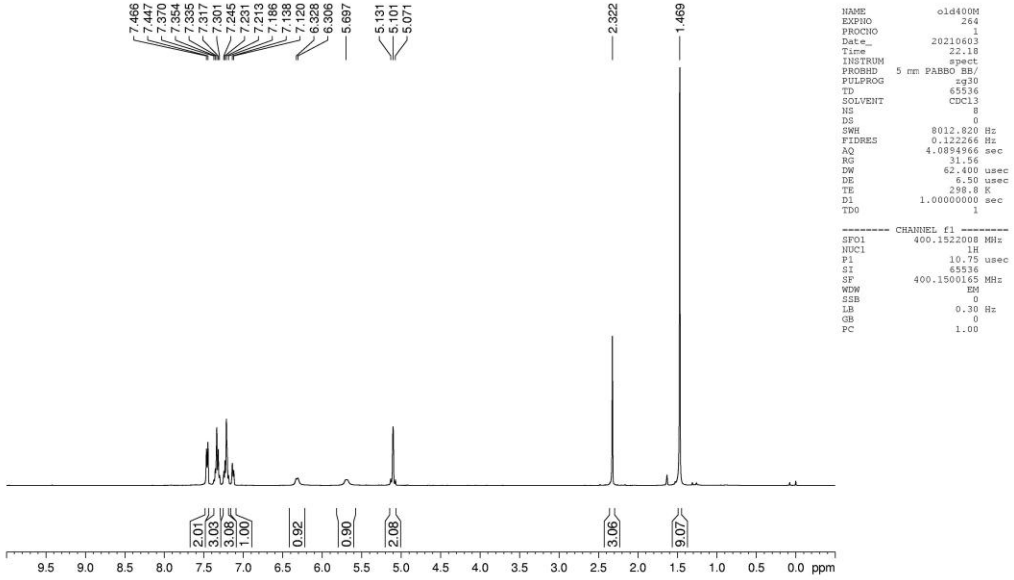

```

NAME      old400M
EXPNO    264
PROCNO   1
Date_    20210603
Time     22.18
Spect    spect
INSTRUM  spect
PROBHD   5 mm PABBO BB/
PULPROG  zgpg30
TD       65536
SOLVENT  CDCl3
NS       8
DS       0
SWH      8012.820 Hz
FIDRES   0.122268 Hz
AQ       4.0894966 sec
RG       31.56
DW       62.400 usec
DE       6.50 usec
TE       298.8 K
D1       1.00000000 sec
TD0      1
----- CHANNEL f1 -----
SFO1    400.1522008 MHz
NUC1     1H
P1       10.75 usec
SI       65536
SF       400.1500165 MHz
WDW      EM
SSB      0
LB       0.30 Hz
GB       0
PC       1.00

```

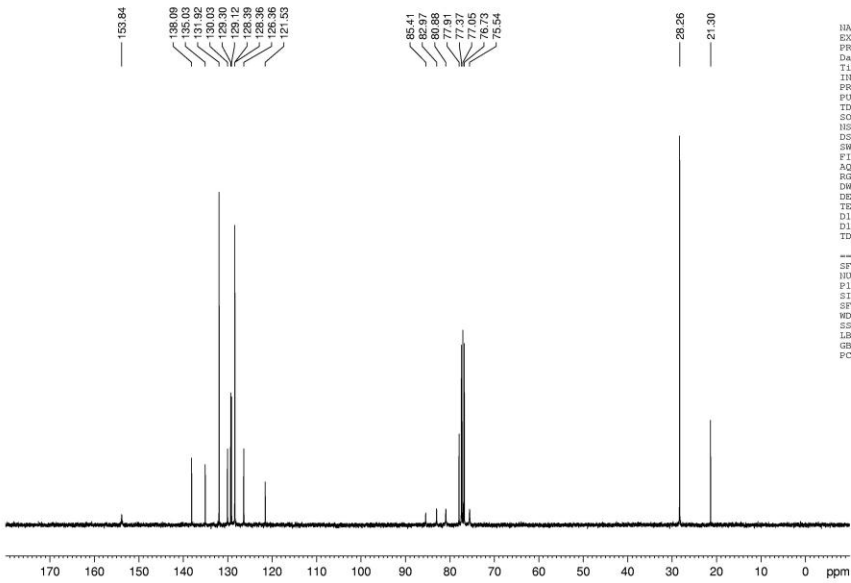

```

NAME      old400M
EXPNO    265
PROCNO   1
Date_    20210603
Time     22.21
Spect    spect
INSTRUM  spect
PROBHD   5 mm PABBO BB/
PULPROG  zgpg30
TD       65536
SOLVENT  CDCl3
NS       344
DS       0
SWH      25252.528 Hz
FIDRES   0.385323 Hz
AQ       1.2776629 sec
RG       195.85
DW       19.800 usec
DE       6.50 usec
TE       298.8 K
D1       2.00000000 sec
D11      0.03000000 sec
TD0      1
----- CHANNEL f1 -----
SFO1    100.6283629 MHz
NUC1     13C
P1       10.50 usec
SI       32768
SF       100.6177980 MHz
WDW      EM
SSB      0
LB       1.00 Hz
GB       0
PC       1.40

```

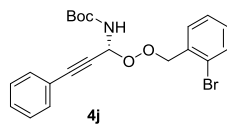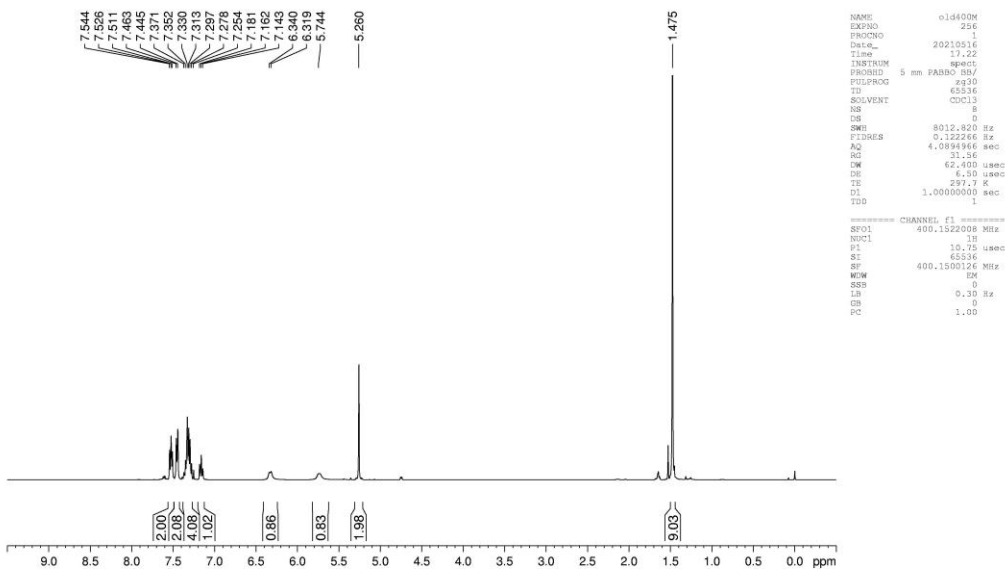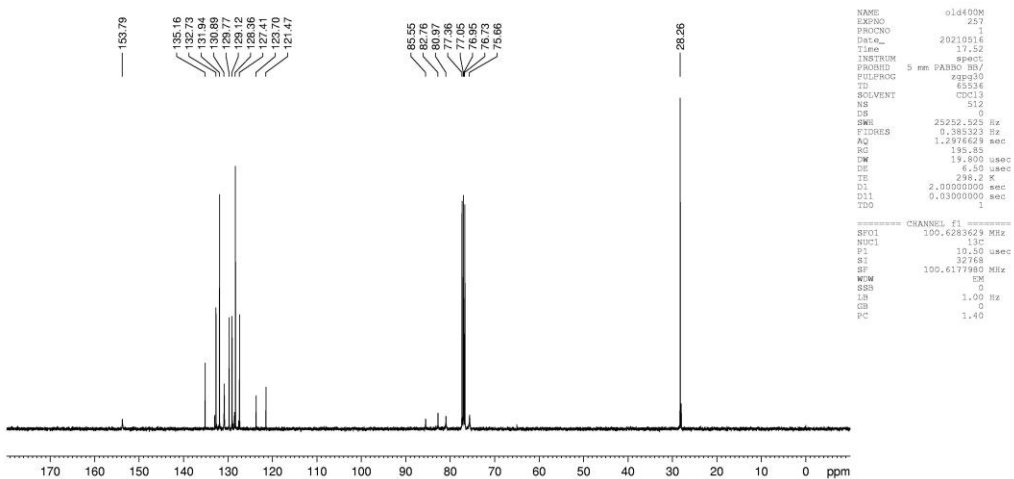

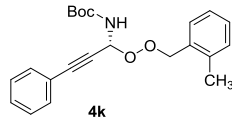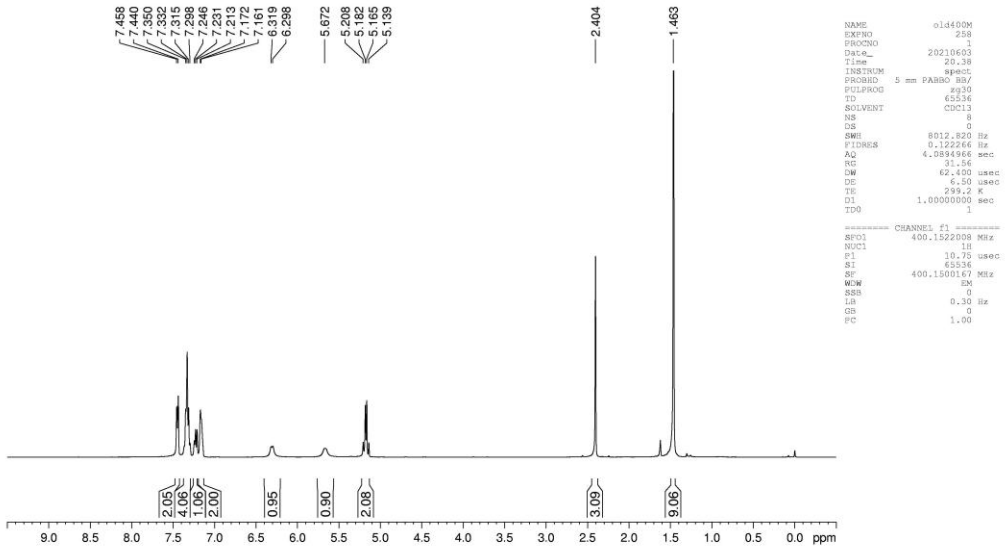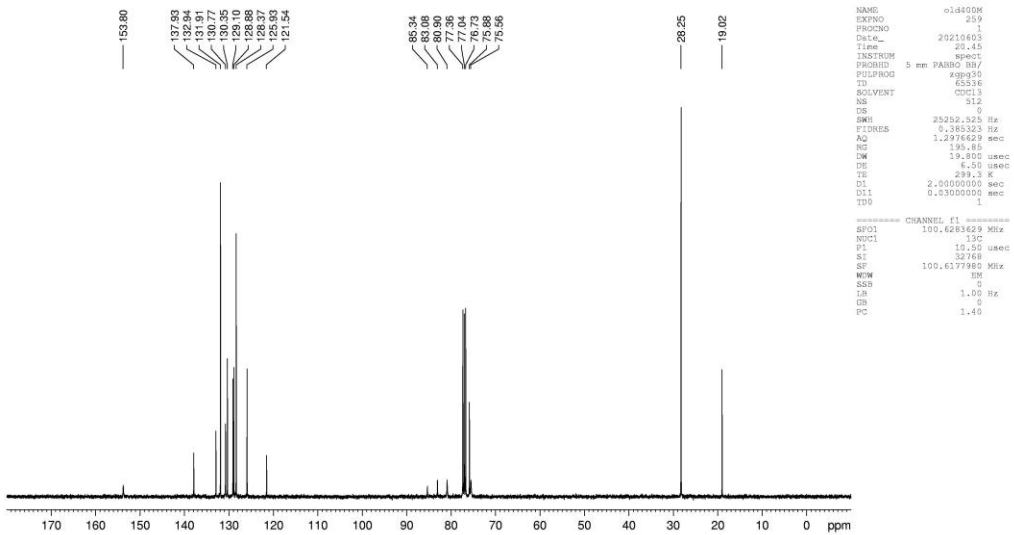

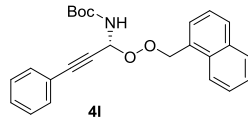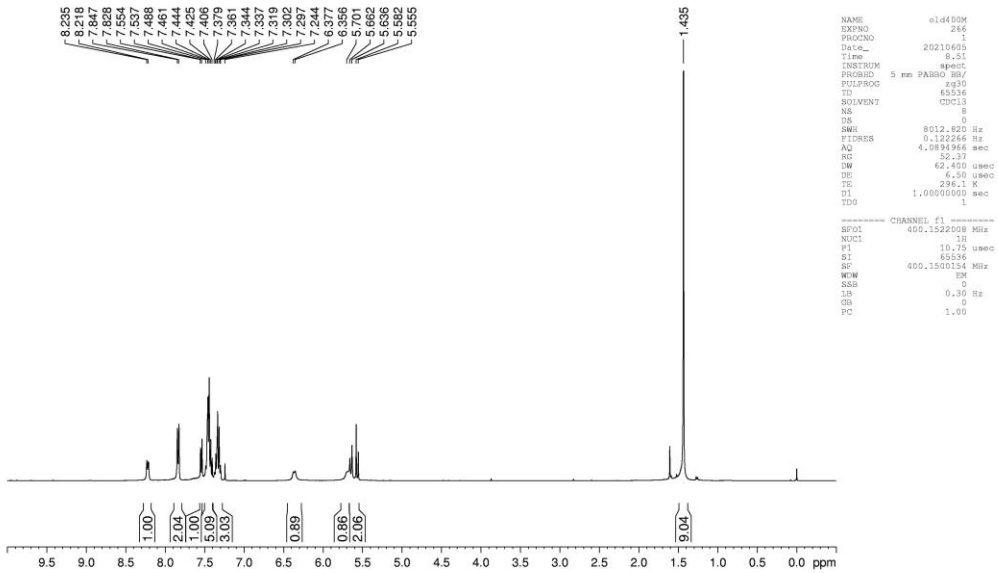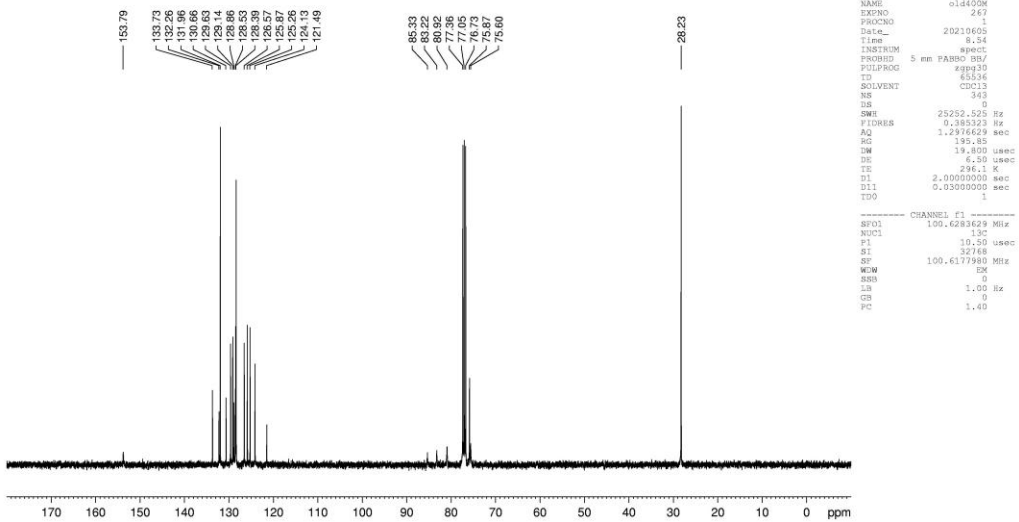

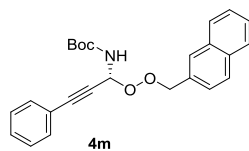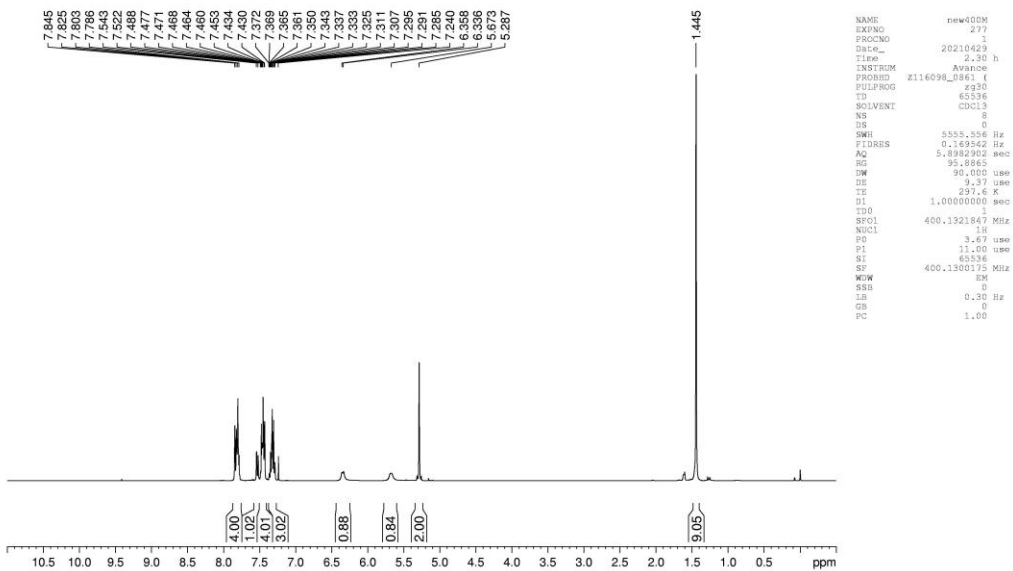

```

NAME      new400M
EXPNO     277
PROCNO    1
Date_     20210429
Time      2.30 h
INSTRUM   Avance
PROBHD    Z11609H_0861 (
PULPROG   zg30
TD         65536
SOLVENT   CDCl3
NS         8
DS         0
SWH        5552.556 Hz
FIDRES    0.169342 Hz
AQ         5.8982902 sec
RG         95.8865
DW         99.000 usec
DE         9.37 usec
TE         293.4 K
D1         1.00000000 sec
TD0        1
SFO1      400.1321847 MHz
NUC1       1H
PC         3.67 usec
P1         11.00 usec
SI         65536
SF         400.1300175 MHz
WDW        EM
SSB        0
LB         0.30 Hz
GB         0
PC         1.00
  
```

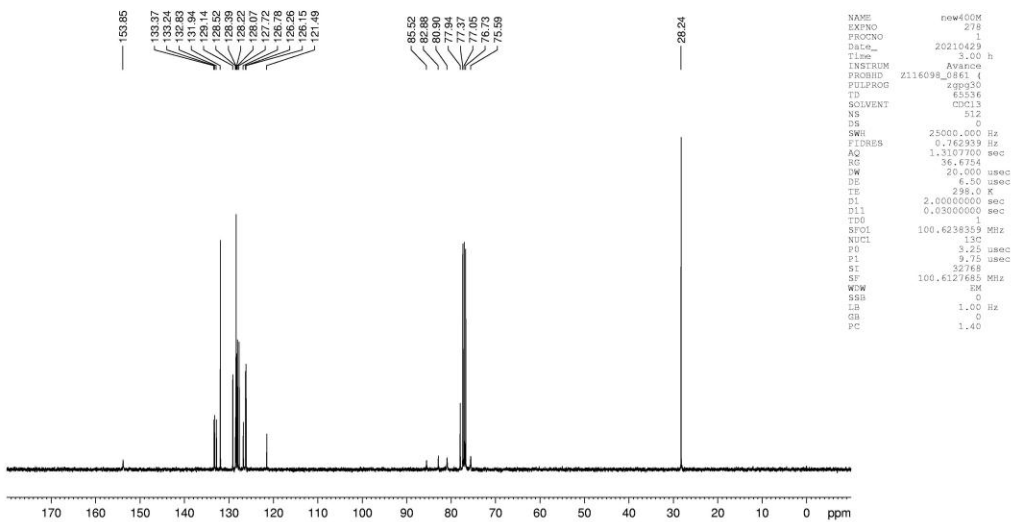

```

NAME      new400M
EXPNO     278
PROCNO    1
Date_     20210429
Time      3.00 h
INSTRUM   Avance
PROBHD    Z11609H_0861 (
PULPROG   zgpg30
TD         65536
SOLVENT   CDCl3
NS         512
DS         0
SWH        25000.000 Hz
FIDRES    0.762939 Hz
AQ         1.3107700 sec
RG         36.6754
DW         20.000 usec
DE         6.56 usec
TE         298.0 K
D1         2.00000000 sec
D11        0.05000000 sec
TD0        1
SFO1      100.6238359 MHz
NUC1       13C
PC         3.25 usec
P1         9.75 usec
SI         32768
SF         100.6127685 MHz
WDW        EM
SSB        0
LB         1.00 Hz
GB         0
PC         1.40
  
```

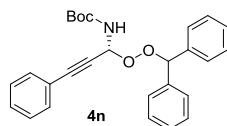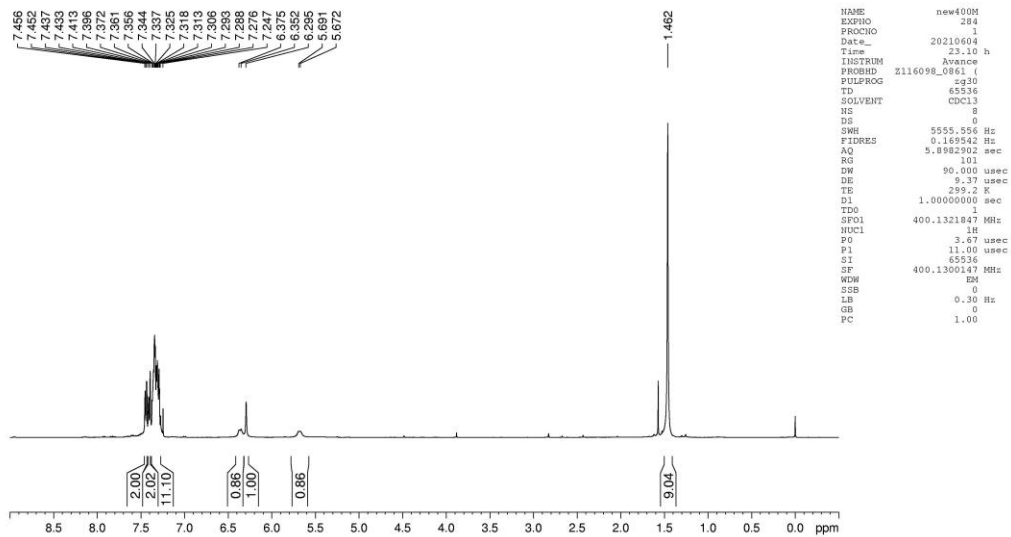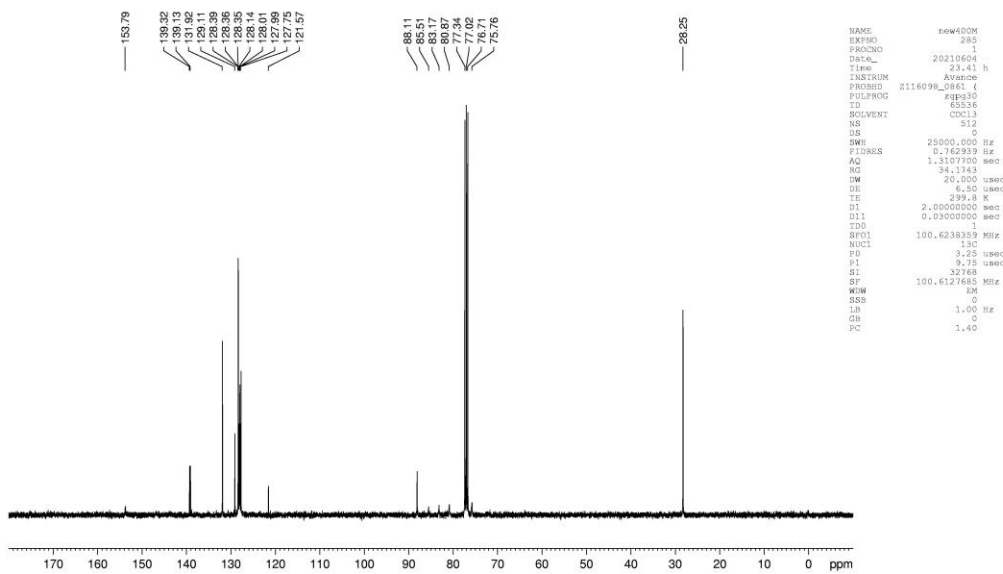

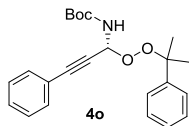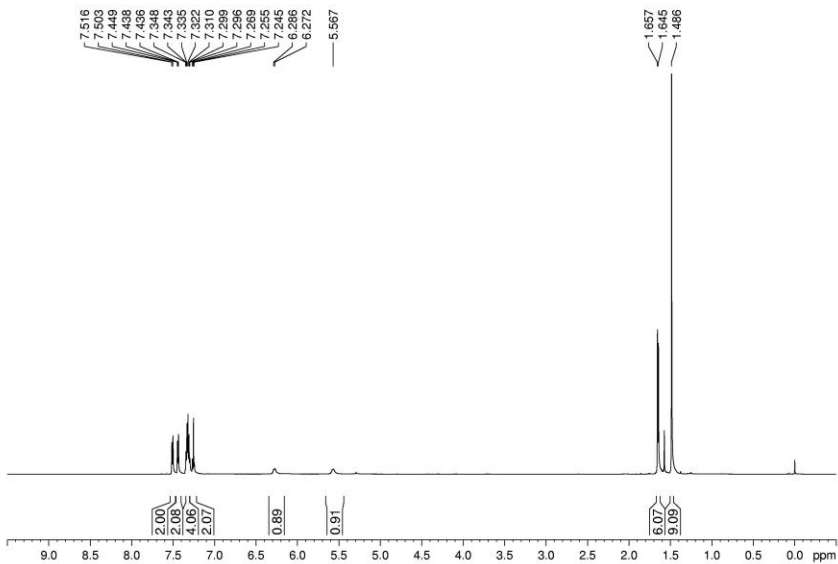

```

NAME      600M
EXPNO    126
PROCNO   1
Date_    20211208
Time     17.36 h
INSTRUM  Avance
PROBHD   Z16873_0024 (
PULPROG  zg30
TD        65536
SOLVENT  CDCl3
NS        4
DS        2
SMB      11904.762 Hz
FIDRES   0.363304 Hz
AQ        2.7525620 sec
RG        101
SWH       42.000 usec
DE        13.70 usec
TE        298.0 K
D1        1.00000000 sec
TDO       1
SFO1     600.137060 MHz
NUC1      1H
PD        4.00 usec
P1        12.00 usec
SI        65536
SF        600.1701119 MHz
MWM       EM
SSB       0
LB        0.30 Hz
GB        0
PC        1.00
  
```

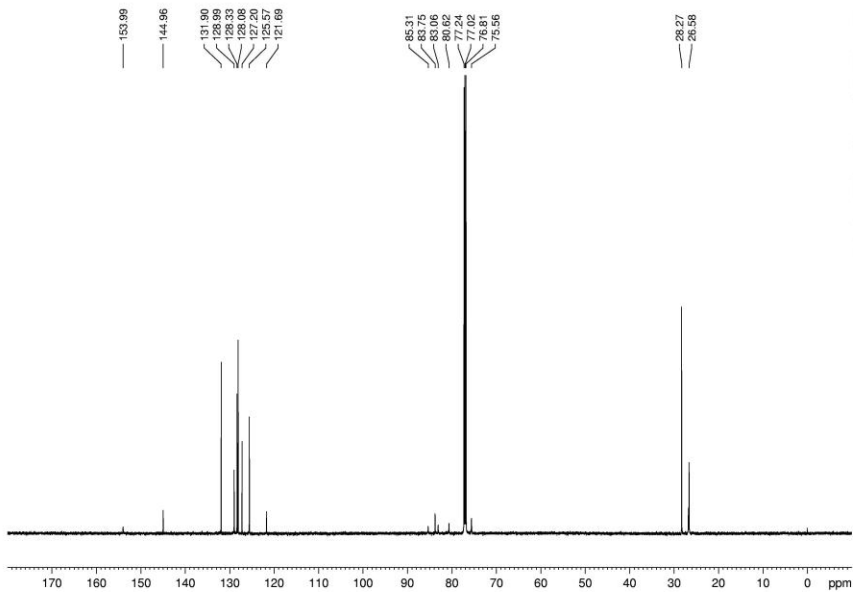

```

NAME      600M
EXPNO    127
PROCNO   1
Date_    20211208
Time     17.50 h
INSTRUM  Avance
PROBHD   Z16873_0024 (
PULPROG  zgpg30
TD        65536
SOLVENT  CDCl3
NS        4
DS        2
SMB      35714.285 Hz
FIDRES   1.08995 Hz
AQ        0.9175540 sec
RG        101
SWH       14.000 usec
DE        18.00 usec
TE        298.0 K
D1        2.00000000 sec
D11       0.03000000 sec
TDO       1
SFO1     150.9279978 MHz
NUC1      13C
PD        3.33 usec
P1        16.00 usec
SI        32768
SF        150.9128665 MHz
MWM       EM
SSB       0
LB        1.00 Hz
GB        0
PC        1.40
  
```

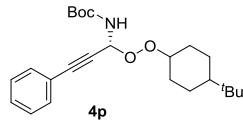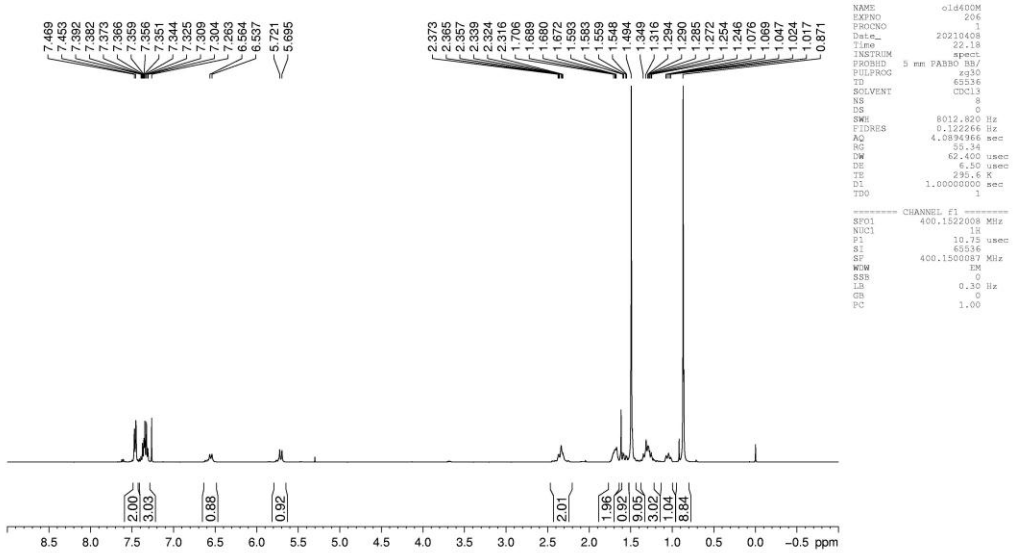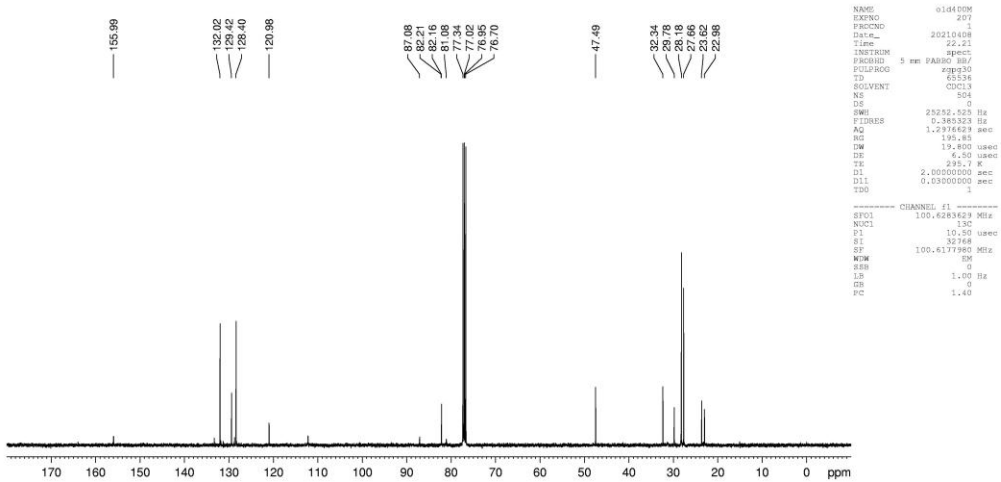



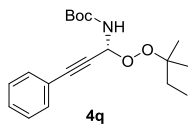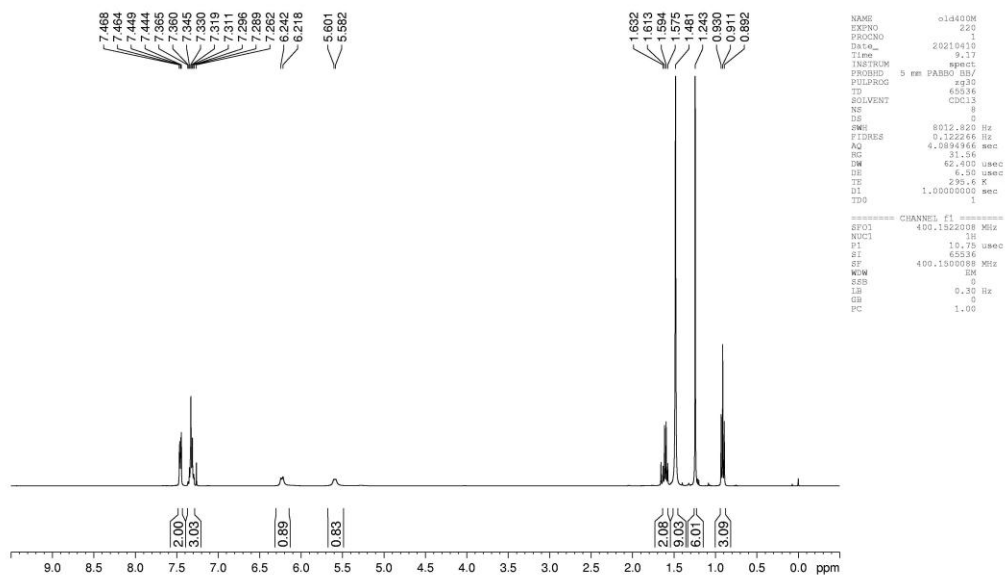

```

NAME          old400M
EXPNO         220
PROCNO        1
Date_         20210410
Time          9.17
INSTRUM       spect
PROBHD        5 mm PABBO BB/
PULPROG       zgpg30
TD            65536
SOLVENT       CDCl3
NS            3
DS            0
SWH           8012.820 Hz
FIDRES       0.122266 Hz
AQ           4.4894965 sec
RG           31.56
DW           62.400 usec
DE           6.50 usec
TE           295.6 K
D1           1.00000000 sec
D11          1
TD0          1

===== CHANNEL f1 =====
SFO1         400.1522008 MHz
NUC1         1H
P1           19.75 usec
SI           65536
SF           400.1500088 MHz
KW          28
SSB          0
LB           0.30 Hz
GB           0
PC           1.00
  
```

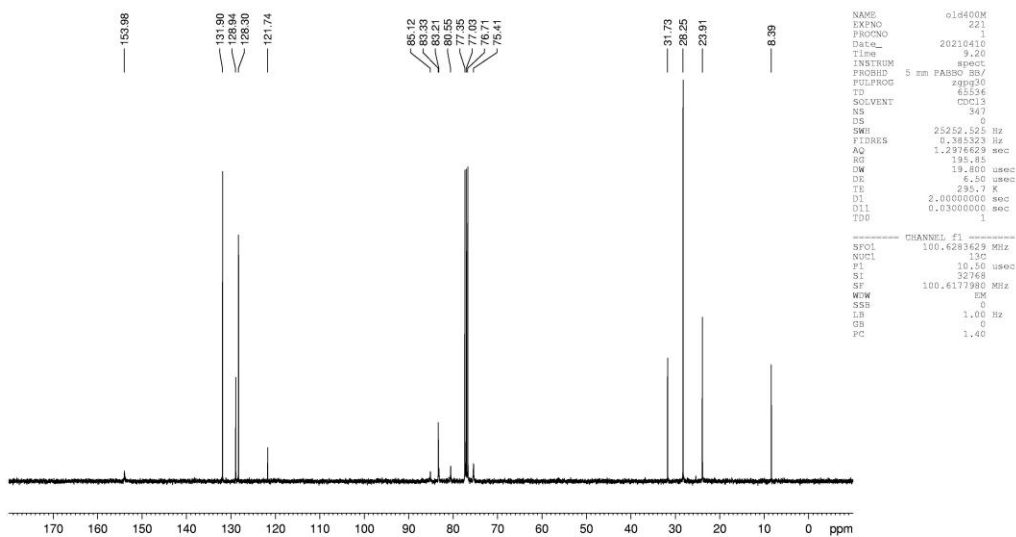

```

NAME          old400M
EXPNO         221
PROCNO        1
Date_         20210410
Time          9.28
INSTRUM       spect
PROBHD        5 mm PABBO BB/
PULPROG       zgpg30
TD            65536
SOLVENT       CDCl3
NS            347
DS            0
SWH          25252.525 Hz
FIDRES       0.395323 Hz
AQ           1.2376623 sec
RG           195.85
DW           19.800 usec
DE           6.50 usec
TE           295.7 K
D1           2.00000000 sec
D11          0.03000000 sec
TD0          1

===== CHANNEL f1 =====
SFO1         100.6284629 MHz
NUC1         13C
P1           19.50 usec
SI           32768
SF           100.6177980 MHz
KW          28
SSB          0
LB           1.00 Hz
GB           0
PC           1.40
  
```

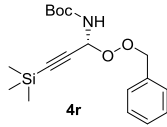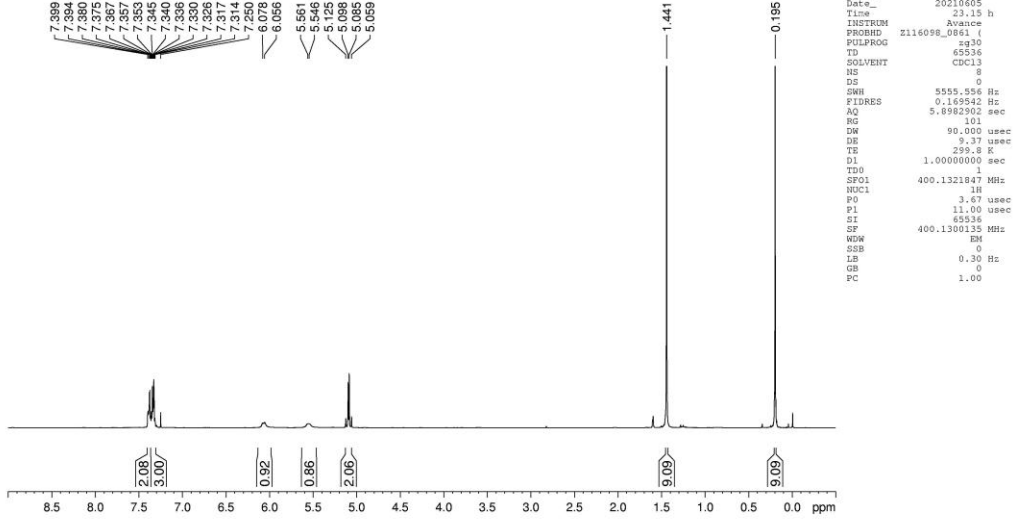

```

NAME          new400M
EXPNO         291
PROCNO        1
Date_         20210605
Time          23.15 h
INSTRUM       Avance
PROBHD        Z116098_0861 (
PULPROG       zg30
TD            65536
SOLVENT       CDCl3
NS            8
DS            0
SWH           5555.556 Hz
FIDRES        0.165842 Hz
AQ            5.8982902 sec
RG            101
DW            90.000 usec
DE            9.37 usec
TE            299.8 K
D1            1.00000000 sec
TD0           1
SF01          400.1321847 MHz
NUC1          1H
PC            3.67 usec
P1            11.00 usec
SI            85936
SF            400.1300135 MHz
WDW           EM
SSB           0
LB            0.30 Hz
GB            0
PC            1.00
  
```

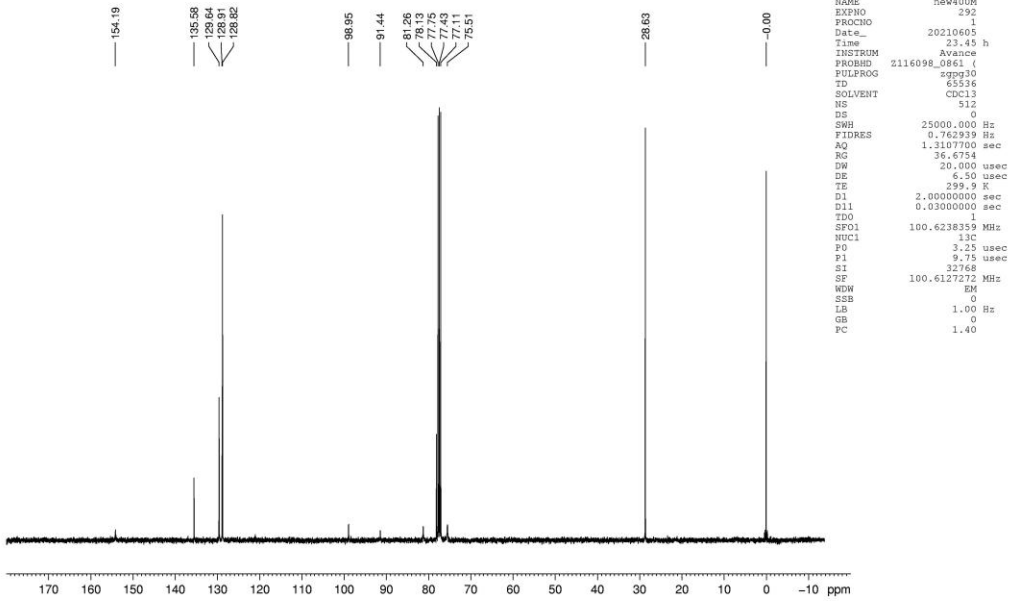

```

NAME          new400M
EXPNO         292
PROCNO        1
Date_         20210605
Time          23.45 h
INSTRUM       Avance
PROBHD        Z116098_0861 (
PULPROG       zgpg30
TD            65536
SOLVENT       CDCl3
NS            512
DS            0
SWH           25000.000 Hz
FIDRES        0.762939 Hz
AQ            1.1107300 sec
RG            36.6754
DW            20.000 usec
DE            6.50 usec
TE            299.9 K
D1            2.00000000 sec
D11           0.43000000 sec
TD0           1
SF01          100.6238359 MHz
NUC1          13C
PC            3.25 usec
P1            9.75 usec
SI            32768
SF            100.6127272 MHz
WDW           EM
SSB           0
LB            1.00 Hz
GB            0
PC            1.40
  
```

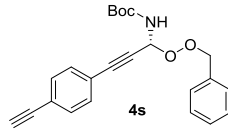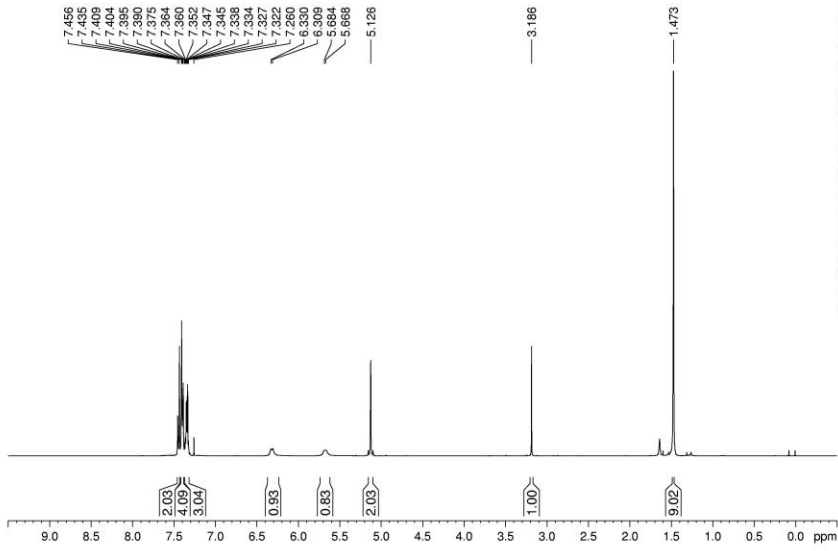

```

NAME          new400M
EXPNO         297
PROCNO        1
Date_         20210729
Time          21:59 h
INSTRUM       Avance
PROBHD        Z116098_0861 (
PULPROG       zg30
TD            65536
SOLVENT       CDCl3
NS            8
DS            0
SWH           5555.556 Hz
FIDRES        0.169542 Hz
AQ            5.8982902 sec
RG            101
DW            90.000 usec
DE            9.37 usec
TE            298.1 K
D1            1.00000000 sec
TDO           1
SFO1          400.1321847 MHz
NUC1          1H
P0            3.67 usec
P1            11.00 usec
SI            65536
SF            400.1300096 MHz
WDW           EM
SSB           0
LB            0.30 Hz
GB            0
PC            1.00
  
```

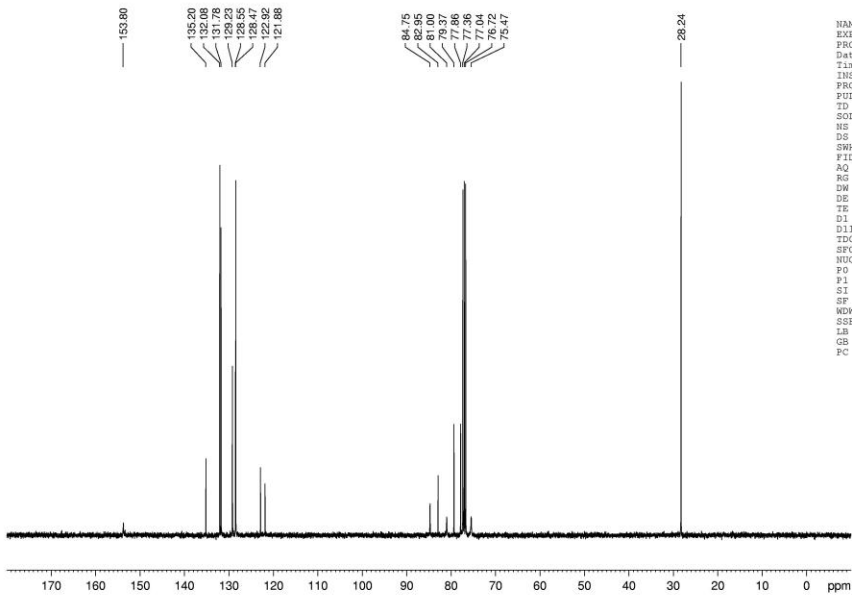

```

NAME          new400M
EXPNO         298
PROCNO        1
Date_         20210729
Time          22:21 h
INSTRUM       Avance
PROBHD        Z116098_0861 (
PULPROG       zgpg30
TD            65536
SOLVENT       CDCl3
NS            376
DS            0
SWH           25000.000 Hz
FIDRES        0.762939 Hz
AQ            1.3107700 sec
RG            16.25
DW            20.000 usec
DE            6.50 usec
TE            298.2 K
D1            2.00000000 sec
D11           0.03000000 sec
TDO           1
SFO1          100.6238359 MHz
NUC1          13C
P0            3.25 usec
P1            9.75 usec
SI            32768
SF            100.6127685 MHz
WDW           EM
SSB           0
LB            1.00 Hz
GB            0
PC            1.40
  
```

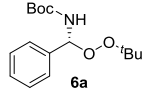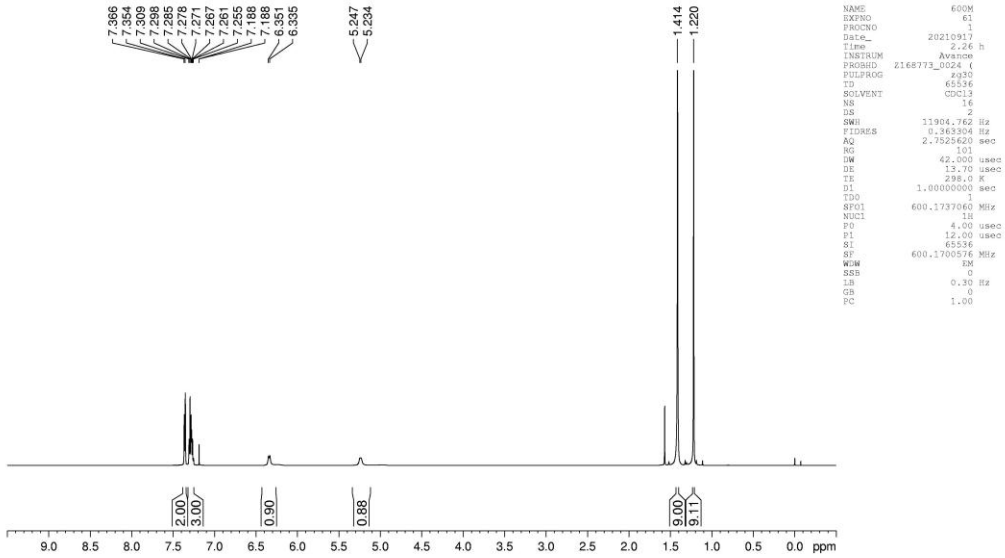

```

NAME          600W
EXPNO         61
PROCNO        1
Date_         20210917
Time          2.26 h
INSTRUM       Avance
PROBHD        Z168773_0024 (
PULPROG       zgpg30
TD            65536
SOLVENT       CDCl3
NS            16
DS            2
SWH           11904.762 Hz
FIDRES        0.263394 Hz
AQ            2.7525620 sec
RG            101
DW            42.000 usec
DE            13.70 usec
TE            298.0 K
D1            1.00000000 sec
TDO           1
SFO1          600.1737060 MHz
NUC1          13
PC            4.00 usec
P1            12.00 usec
SI            65536
SF            600.1700576 MHz
WDW           EM
SSB           0
LB            0.30 Hz
GB            0
PC            1.00
  
```

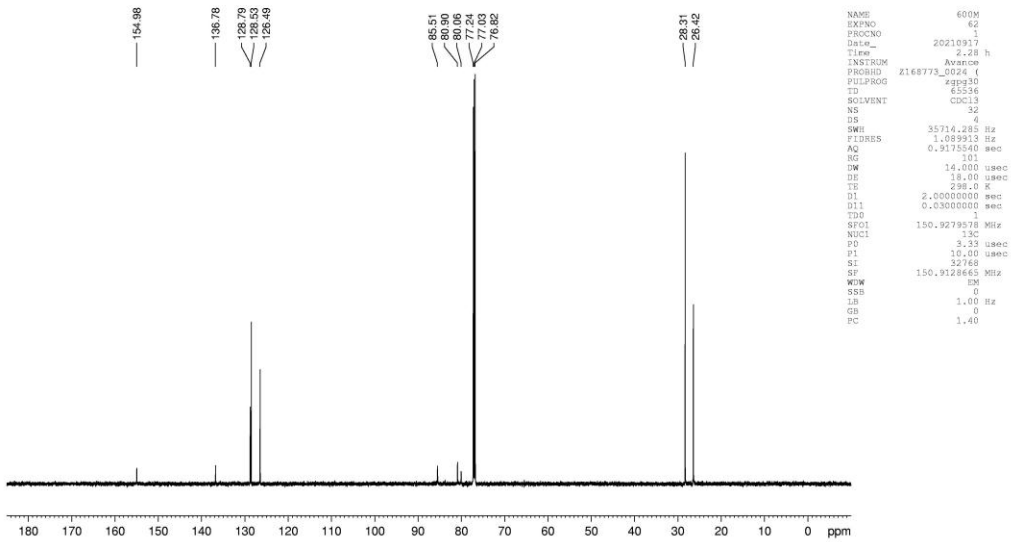

```

NAME          600W
EXPNO         62
PROCNO        1
Date_         20210917
Time          2.28 h
INSTRUM       Avance
PROBHD        Z168773_0024 (
PULPROG       zgpg30
TD            65536
SOLVENT       CDCl3
NS            32
DS            4
SWH           35714.285 Hz
FIDRES        1.083913 Hz
AQ            0.9175540 sec
RG            101
DW            14.000 usec
DE            18.00 usec
TE            298.0 K
D1            2.00000000 sec
D11           0.03000000 sec
TDO           1
SFO1          150.9279578 MHz
NUC1          13
PC            3.33 usec
P1            10.00 usec
SI            32768
SF            150.9128665 MHz
WDW           EM
SSB           0
LB            1.00 Hz
GB            0
PC            1.40
  
```

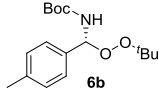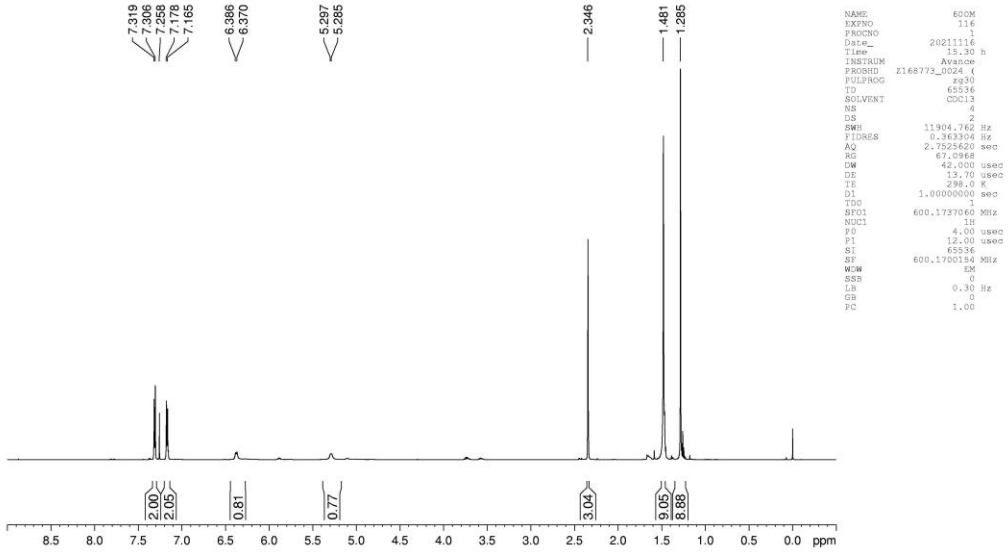

```

NAME      600M
EXPNO    116
PROCNO   1
Date_    20211116
Time     11:30 h
INSTRUM  Avance
PROBHD   Z168773_0024 (
PULPROG  zgpg30
TD       65536
SOLVENT  CDCl3
NS       4
DS       2
SFO1     11904.762 Hz
FIDRES   0.363104 Hz
AQ       2.7525220 sec
RG       67.0968
DM       42.000 usec
DE       13.70 usec
TE       298.0 K
D1       1.0000000 sec
TDO      1
SFO1     600.1737860 MHz
NUC1     1H
P0       4.00 usec
P1       12.00 usec
SI       65536
SF       600.1700154 MHz
WDM      EM
SBS      0
UR       0.10 Hz
GB       0
PC       1.00
  
```

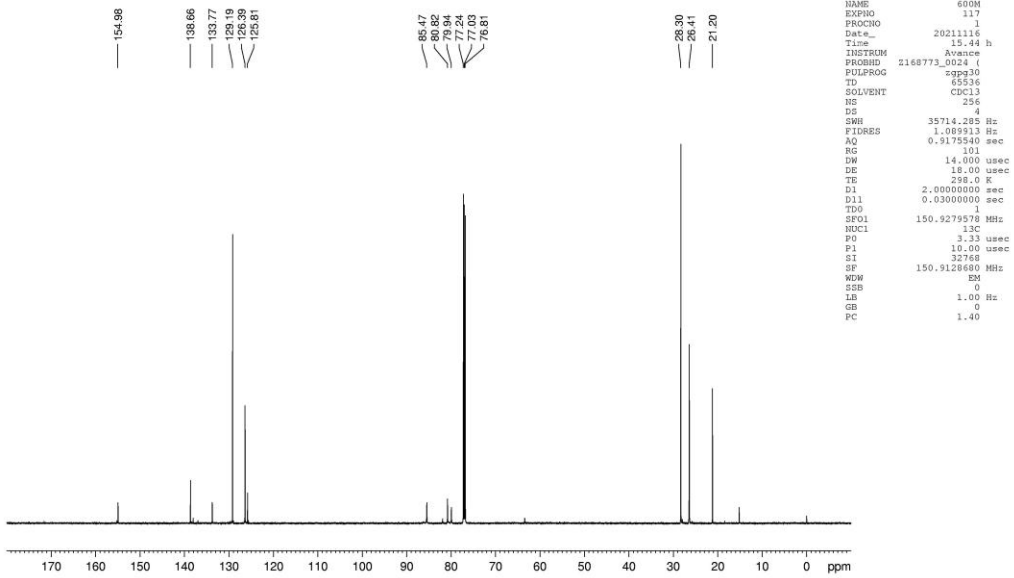

```

NAME      600M
EXPNO    117
PROCNO   1
Date_    20211116
Time     15:44 h
INSTRUM  Avance
PROBHD   Z168773_0024 (
PULPROG  zgpg30
TD       65536
SOLVENT  CDCl3
NS       4
DS       2
SFO1     35714.225 Hz
FIDRES   1.089913 Hz
AQ       0.9175540 sec
RG       101
DM       14.000 usec
DE       18.00 usec
TE       298.0 K
D1       2.0000000 sec
D11      0.0300000 sec
TDO      1
SFO1     150.9279978 MHz
NUC1     13C
P0       3.33 usec
P1       10.00 usec
SI       32768
SF       150.9128680 MHz
WDM      EM
SBS      0
UR       1.00 Hz
GB       0
PC       1.40
  
```

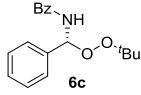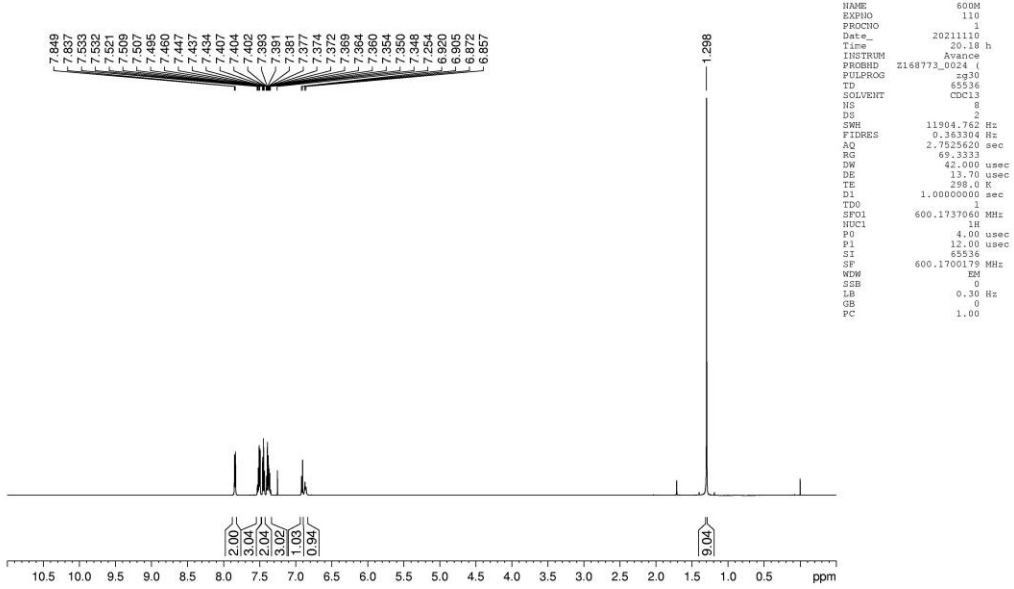

```

NAME          600M
EXPNO         110
PROCNO        1
Date_         20211110
Time         20.18 h
INSTRUM       Avance
PROBHD        z168773_0024 (
PULPROG       zg30
TD            65536
SOLVENT       CDCl3
NS            8
DS            2
SWH           11904.762 Hz
FIDRES       0.363304 Hz
AQ           2.7523620 sec
RG           69.3333
DW           42.000 usec
DE           13.70 usec
TE           298.0 K
D1           1.00000000 sec
TDO          1
SFO1         600.1737060 MHz
NUC1          1H
P0           4.00 usec
P1           12.00 usec
SI           65535
SF           600.1700179 MHz
WDW          EM
SSB          0
LB           0.30 Hz
GB           0
PC           1.00
  
```

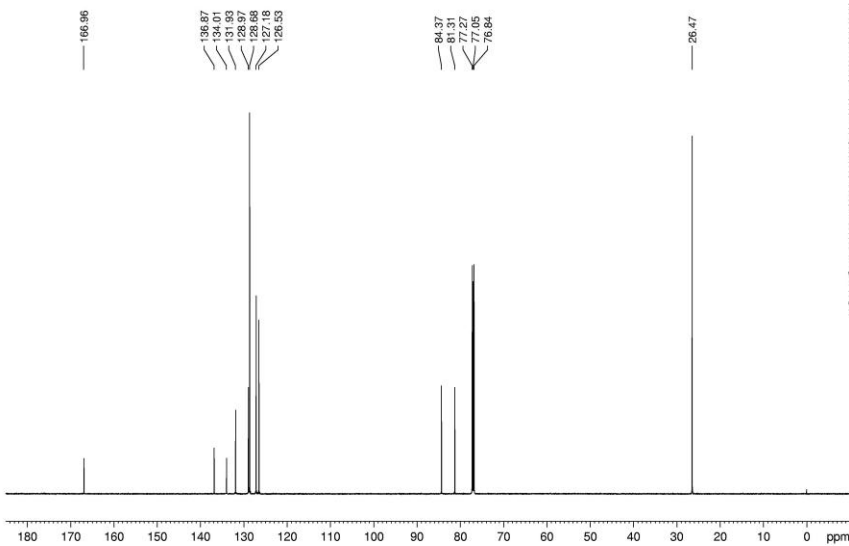

```

NAME          600M
EXPNO         111
PROCNO        1
Date_         20211110
Time         20.32 h
INSTRUM       Avance
PROBHD        z168773_0024 (
PULPROG       zgpg30
TD            65536
SOLVENT       CDCl3
NS            256
DS            4
SWH           35714.285 Hz
FIDRES       1.089913 Hz
AQ           0.9175540 sec
RG           101
DW           14.000 usec
DE           18.00 usec
TE           298.0 K
D1           2.00000000 sec
D11          0.03000000 sec
TDO          1
SFO1         150.9279278 MHz
NUC1          13C
P0           3.33 usec
P1           10.00 usec
SI           32768
SF           150.9128665 MHz
WDW          DM
SSB          0
LB           1.00 Hz
GB           0
PC           1.40
  
```

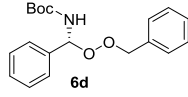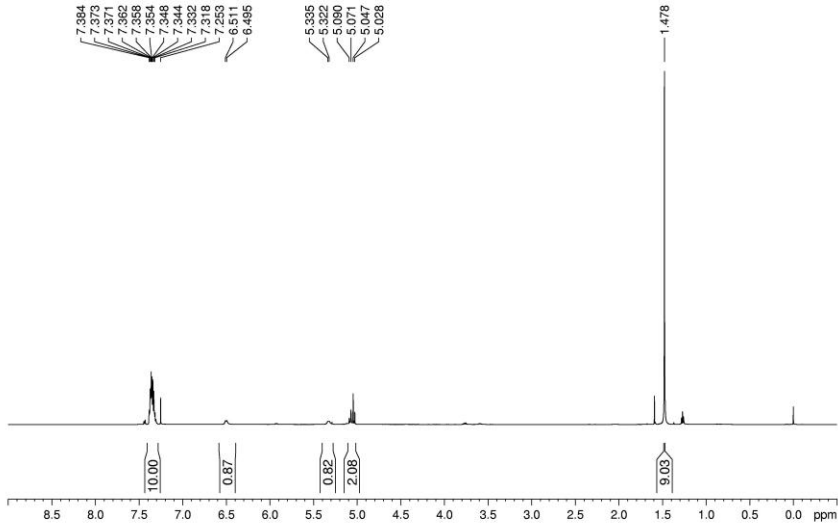

```

NAME      60DM
EXPNO    122
PROCNO   1
DATE_    20211122
Time     15.08 h
INSTRUM  Avance
PROBHD   2168773_0028 4
PULPROG  zg30
TD       65336
SOLVENT  CDCl3
NS       4
DS       2
SWE      11904.762 Hz
FIDRES   0.363308 Hz
AQ       2.7525620 sec
RG       101
DM       42.000 usec
DE       13.70 usec
TE       298.0 K
D1       1.00000000 sec
TDO      1
SFO1     600.1737860 MHz
NUC1     13
PD       4.00 usec
PI       12.00 usec
PT       65336
SF       600.1700104 MHz
Waltz16  ON
SSB      0
LB       0.30 Hz
GB       0
PC       1.00
  
```

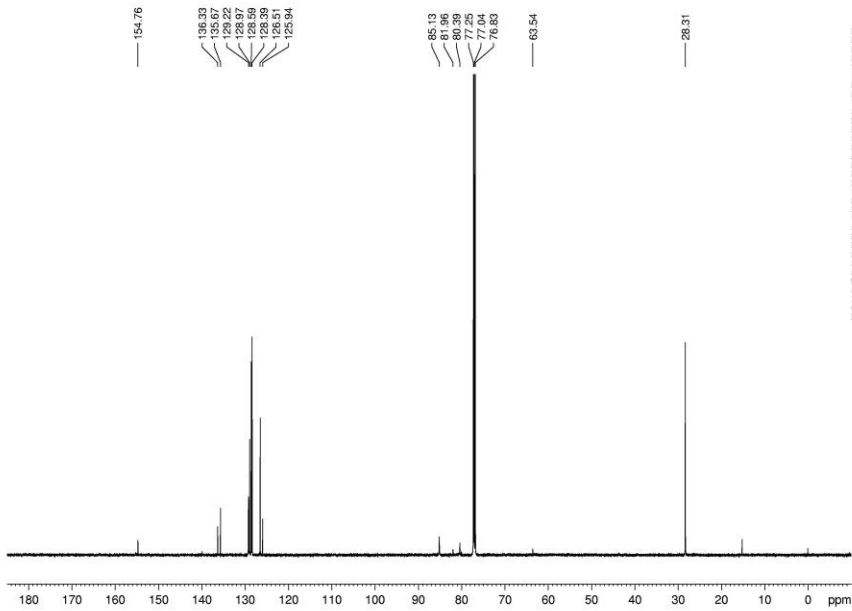

```

NAME      60DM
EXPNO    123
PROCNO   1
DATE_    20211122
Time     15.16 h
INSTRUM  Avance
PROBHD   2168773_0028 4
PULPROG  zgpg30
TD       65336
SOLVENT  CDCl3
NS       128
DS       4
SWE      35714.255 Hz
FIDRES   1.089913 Hz
AQ       0.9175340 sec
RG       101
DM       14.000 usec
DE       18.00 usec
TE       298.0 K
D1       2.00000000 sec
D11      0.03000000 sec
TDO      1
SFO1     150.9279378 MHz
NUC1     13
PD       3.32 usec
PI       10.00 usec
PT       32768
SF       150.9126665 MHz
Waltz16  ON
SSB      0
LB       1.00 Hz
GB       0
PC       1.40
  
```

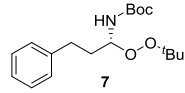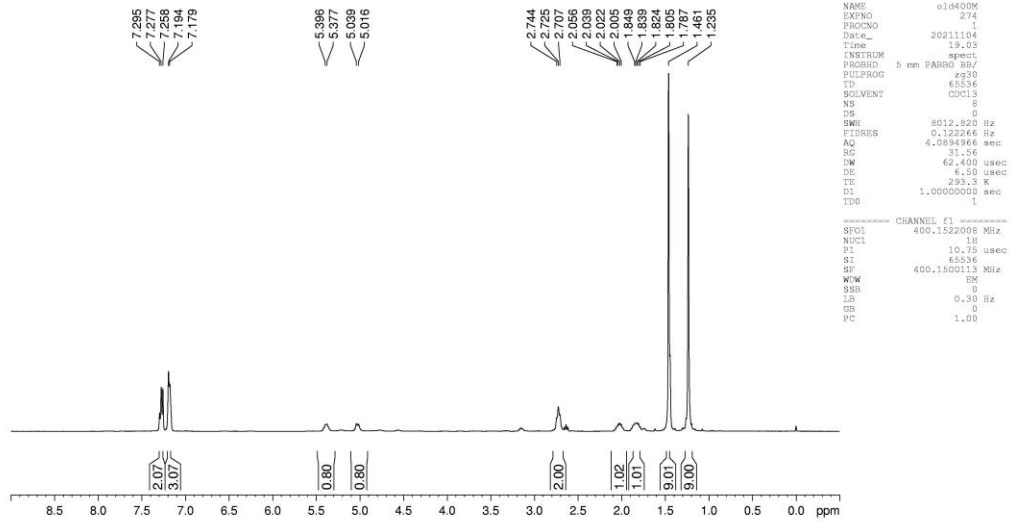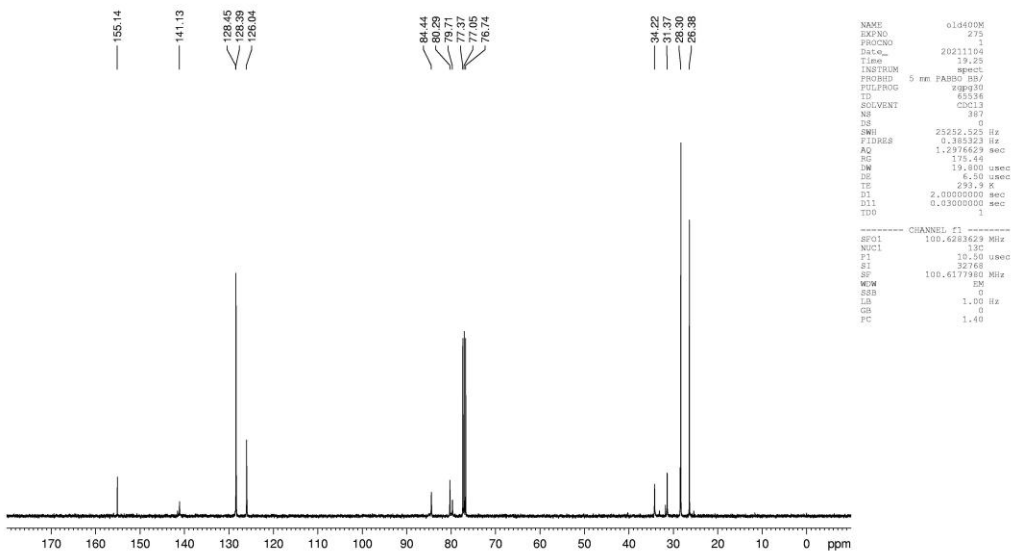



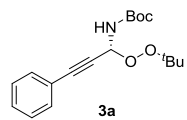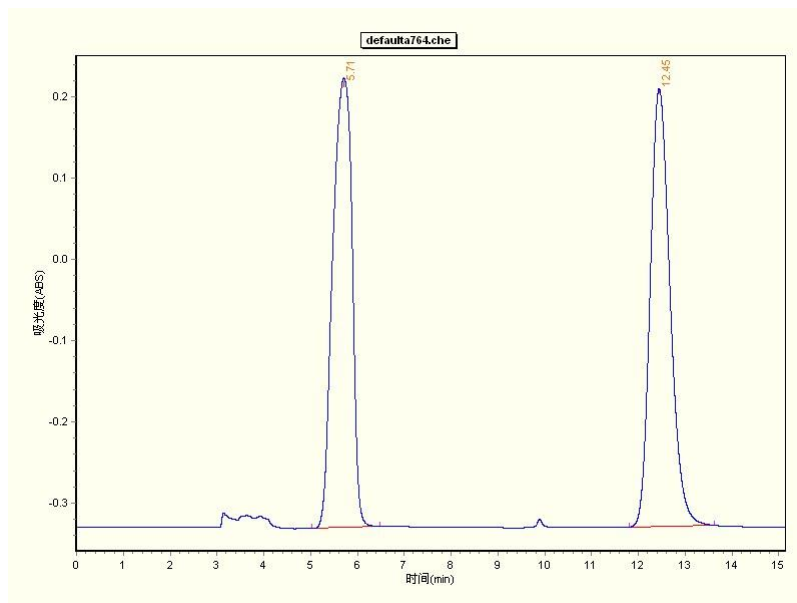

| Entry | Retention time | Area    | Height | Area% | Width | Type |
|-------|----------------|---------|--------|-------|-------|------|
| 1     | 5.71           | 7921954 | 276397 | 49.89 | 1.483 | BB   |
| 2     | 12.45          | 7958419 | 269596 | 50.11 | 2.350 | BB   |

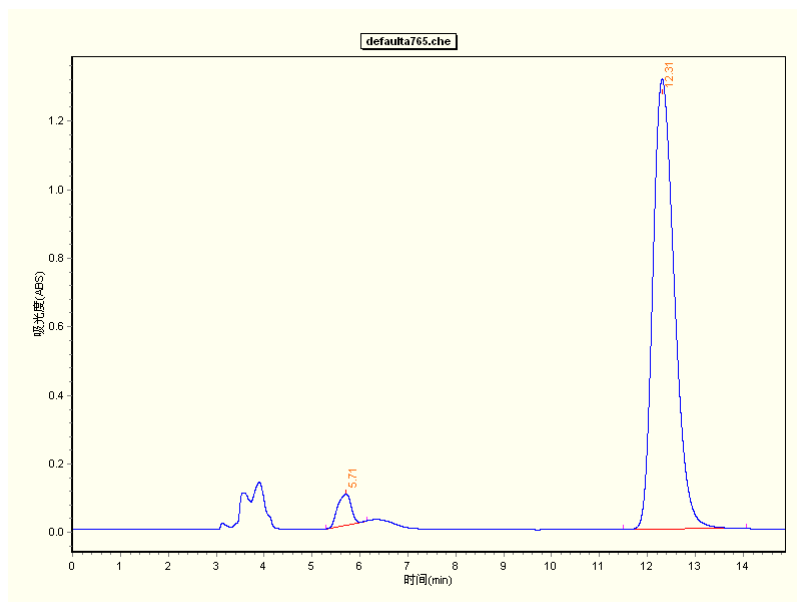

| Entry | Retention time | Area     | Height | Area% | Width | Type |
|-------|----------------|----------|--------|-------|-------|------|
| 1     | 5.71           | 876573   | 45151  | 4.11  | 0.761 | BB   |
| 2     | 12.31          | 20474346 | 656756 | 95.89 | 2.584 | BB   |

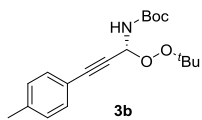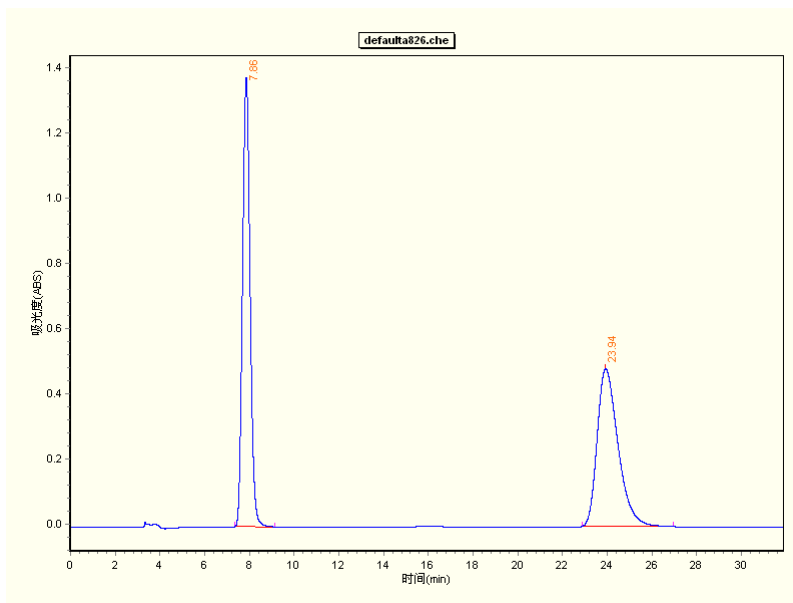

| Entry | Retention time | Area     | Height | Area% | Width | Type |
|-------|----------------|----------|--------|-------|-------|------|
| 1     | 7.86           | 16147332 | 686988 | 50.79 | 1.782 | BB   |
| 2     | 23.94          | 15647870 | 241729 | 49.21 | 4.057 | BB   |

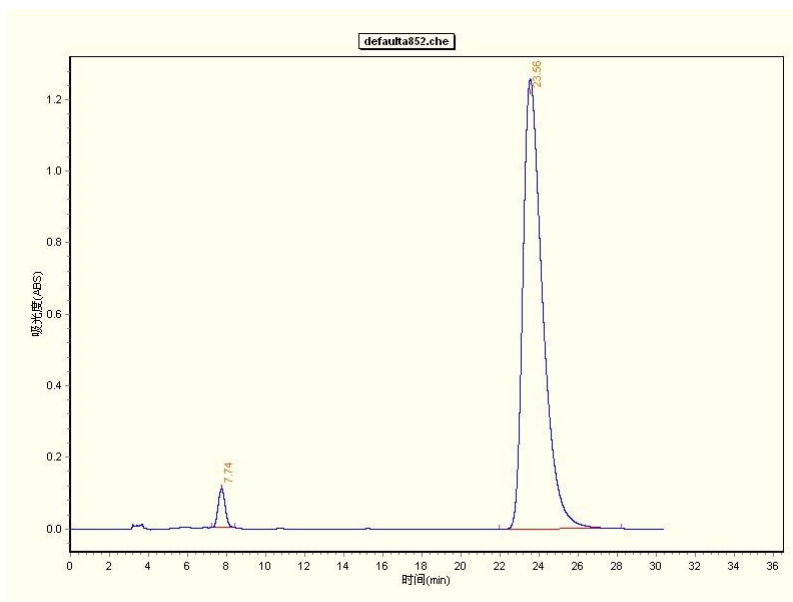

| Entry | Retention time | Area    | Height | Area% | Width | Type |
|-------|----------------|---------|--------|-------|-------|------|
| 1     | 7.74           | 1362506 | 54450  | 2.99  | 1.194 | BB   |
| 2     | 23.56          | 4134927 | 628800 | 97.01 | 6.626 | BB   |

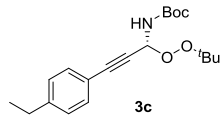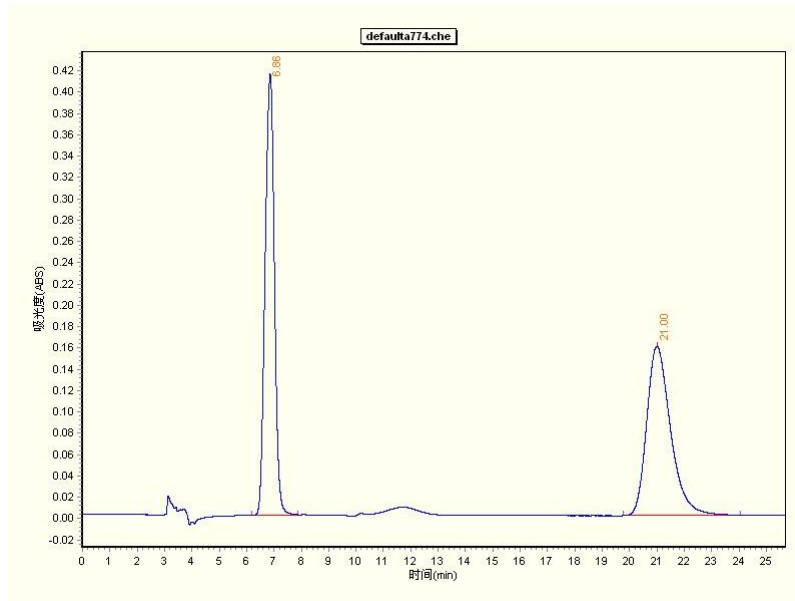

| Entry | Retention time | Area    | Height | Area% | Width | Type |
|-------|----------------|---------|--------|-------|-------|------|
| 1     | 6.86           | 4875471 | 206846 | 50.35 | 1.667 | BB   |
| 2     | 21.00          | 4808935 | 79333  | 49.65 | 4.292 | BB   |

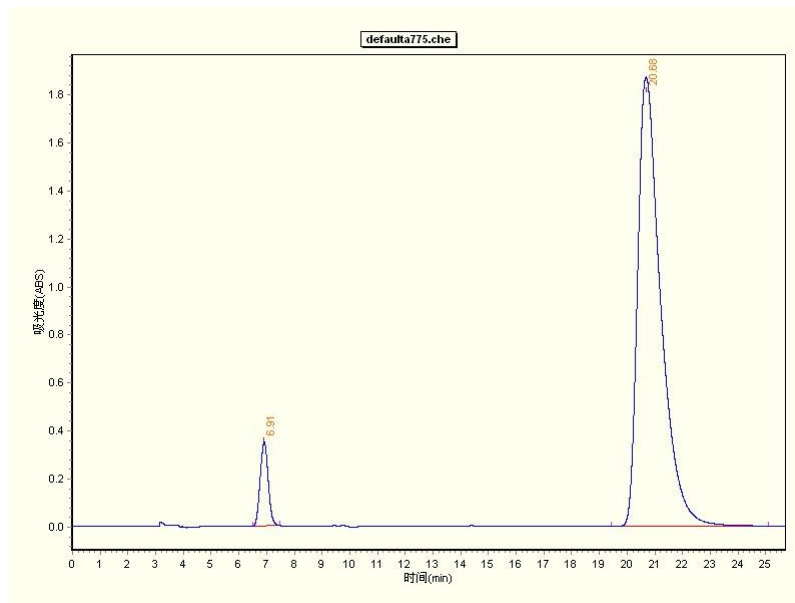

| Entry | Retention time | Area     | Height | Area% | Width | Type |
|-------|----------------|----------|--------|-------|-------|------|
| 1     | 6.91           | 3507020  | 173828 | 6.10  | 0.974 | BB   |
| 2     | 20.68          | 54013567 | 935743 | 93.90 | 5.688 | BB   |

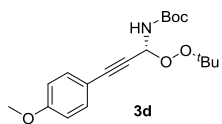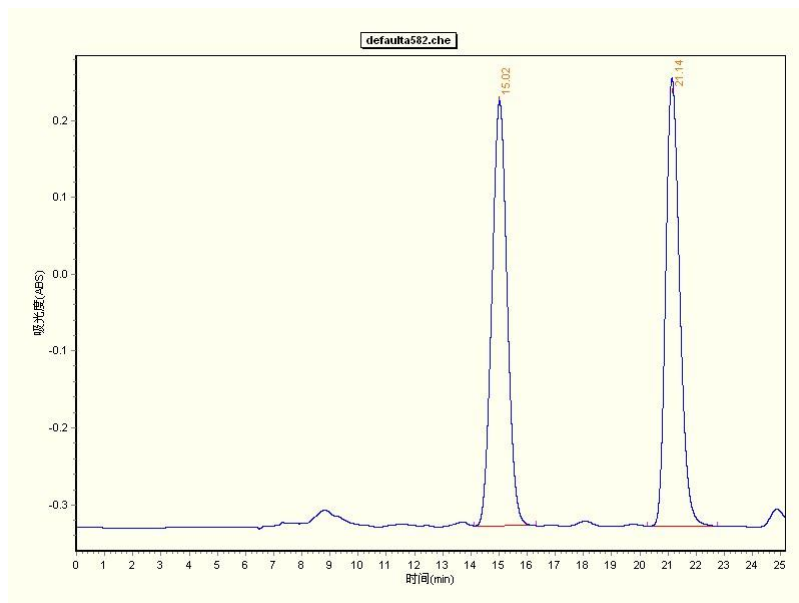

| Entry | Retention time | Area     | Height | Area% | Width | Type |
|-------|----------------|----------|--------|-------|-------|------|
| 1     | 15.02          | 10390246 | 276483 | 50.83 | 2.199 | BB   |
| 2     | 21.14          | 10052915 | 291278 | 49.17 | 2.488 | BB   |

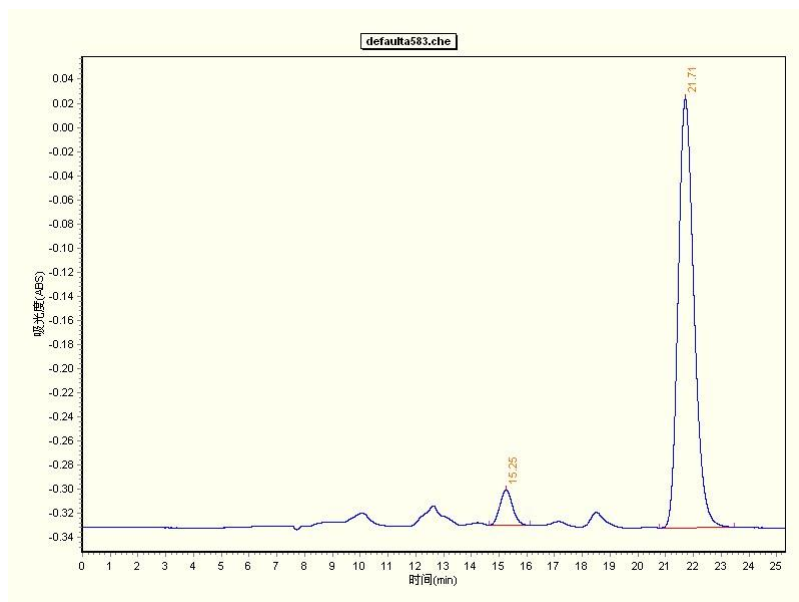

| Entry | Retention time | Area    | Height | Area% | Width | Type |
|-------|----------------|---------|--------|-------|-------|------|
| 1     | 15.25          | 455070  | 14558  | 6.08  | 1.46  | BB   |
| 2     | 21.71          | 7027282 | 177627 | 93.92 | 2.707 | BB   |

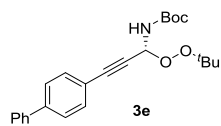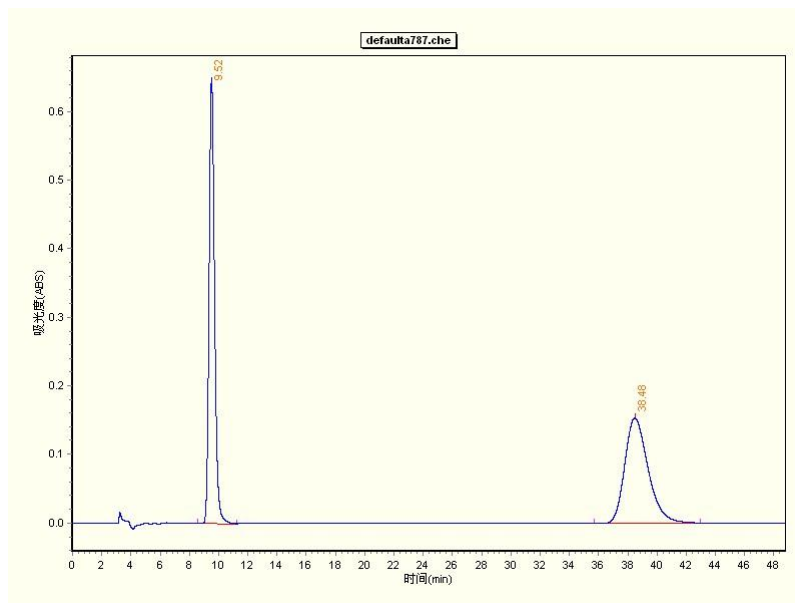

| Entry | Retention time | Area    | Height | Area% | Width | Type |
|-------|----------------|---------|--------|-------|-------|------|
| 1     | 9.52           | 8477123 | 324619 | 49.86 | 2.660 | BB   |
| 2     | 38.48          | 8523634 | 76766  | 50.14 | 7.302 | BB   |

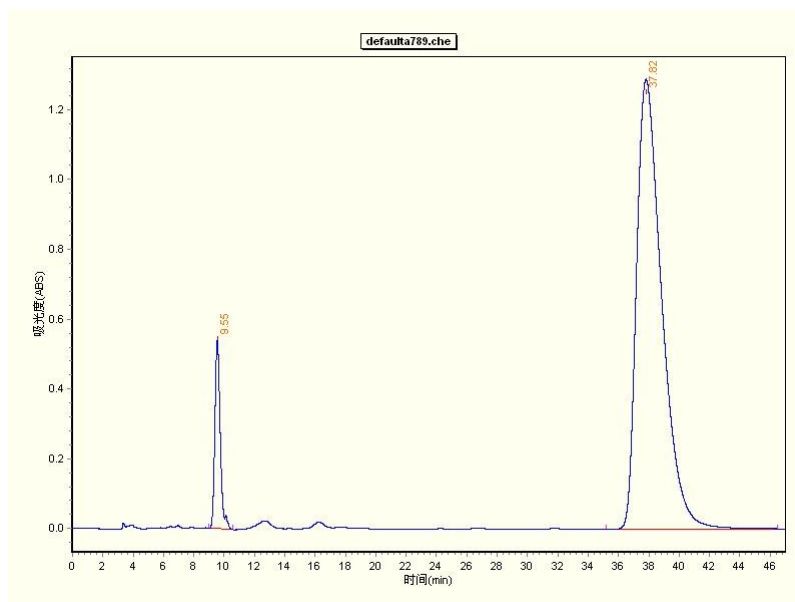

| Entry | Retention time | Area     | Height | Area% | Width  | Type |
|-------|----------------|----------|--------|-------|--------|------|
| 1     | 9.55           | 6693770  | 269642 | 8.30  | 1.565  | BB   |
| 2     | 37.82          | 73943429 | 644134 | 91.70 | 11.293 | BB   |

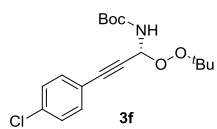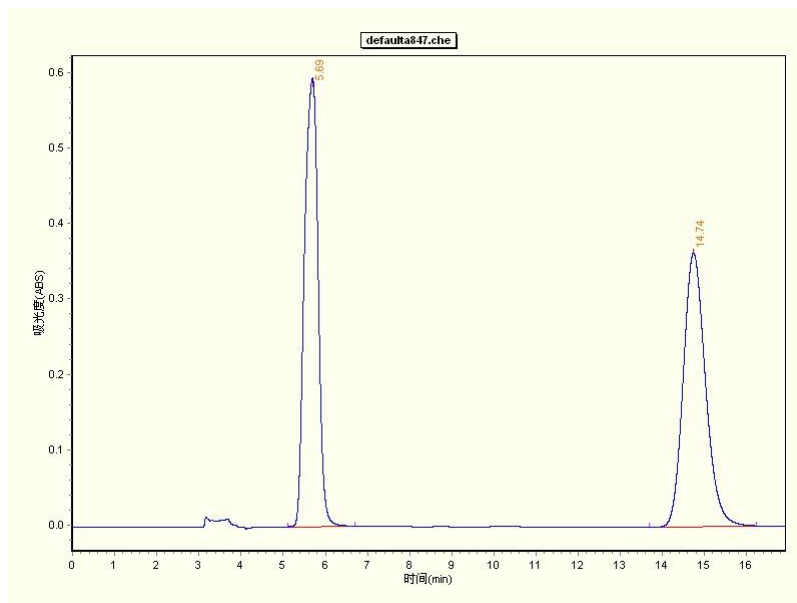

| Entry | Retention time | Area    | Height | Area% | Width | Type |
|-------|----------------|---------|--------|-------|-------|------|
| 1     | 5.69           | 6671936 | 297092 | 50.13 | 1.589 | BB   |
| 2     | 14.74          | 6638164 | 181380 | 49.87 | 2.535 | BB   |

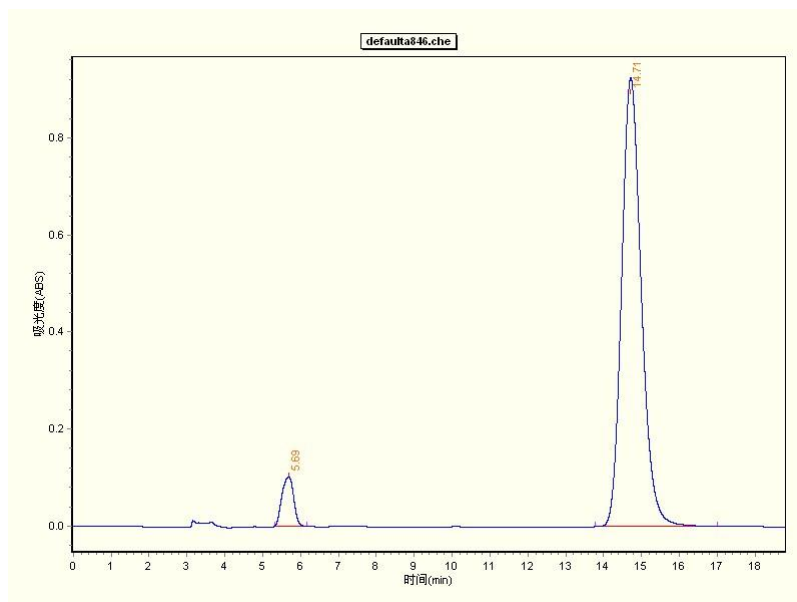

| Entry | Retention time | Area     | Height | Area% | Width | Type |
|-------|----------------|----------|--------|-------|-------|------|
| 1     | 5.69           | 1097137  | 51022  | 6.16  | 0.859 | BB   |
| 2     | 14.71          | 16714001 | 462841 | 93.84 | 3.223 | BB   |

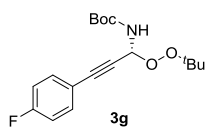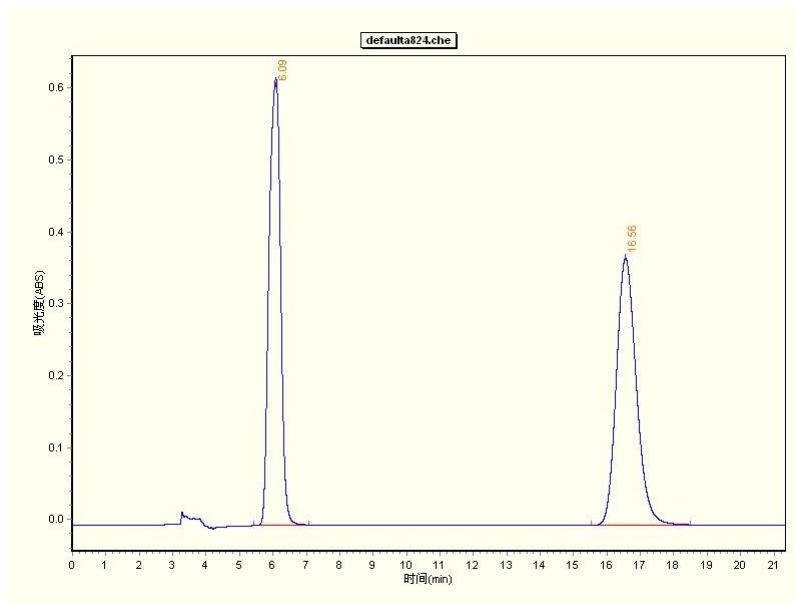

| Entry | Retention time | Area    | Height | Area% | Width | Type |
|-------|----------------|---------|--------|-------|-------|------|
| 1     | 6.09           | 7416039 | 310816 | 49.07 | 1.650 | BB   |
| 2     | 16.56          | 7697130 | 185725 | 50.93 | 2.961 | BB   |

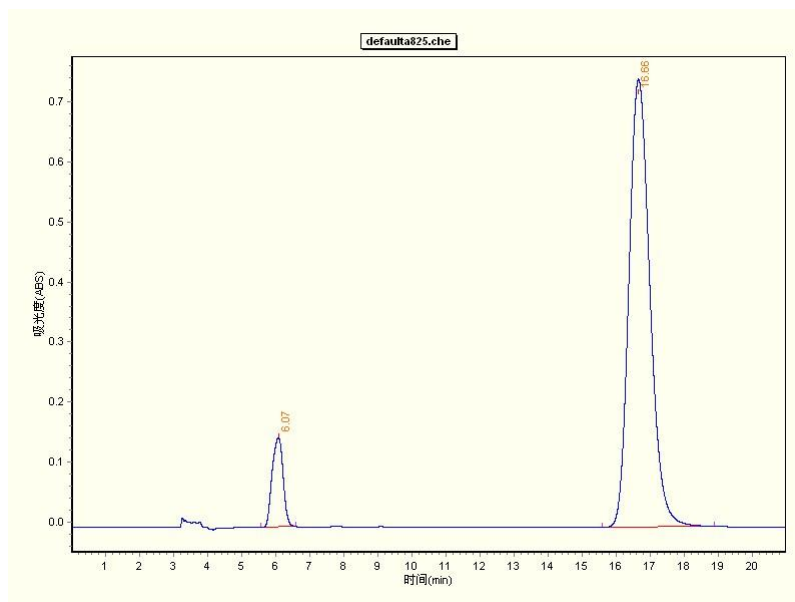

| Entry | Retention time | Area     | Height | Area% | Width | Type |
|-------|----------------|----------|--------|-------|-------|------|
| 1     | 6.07           | 1664606  | 74411  | 9.45  | 1.038 | BB   |
| 2     | 16.66          | 15947145 | 372948 | 90.55 | 3.323 | BB   |

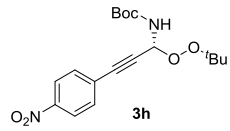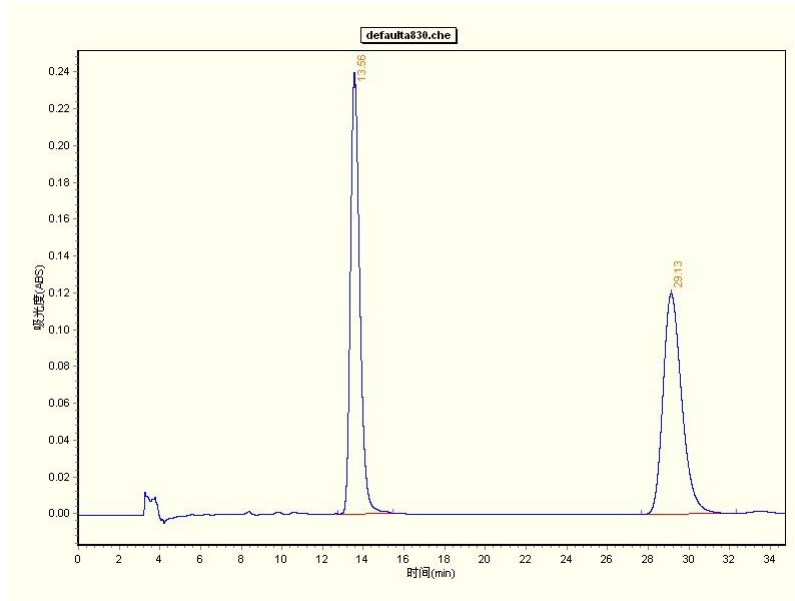

| Entry | Retention time | Area    | Height | Area% | Width | Type |
|-------|----------------|---------|--------|-------|-------|------|
| 1     | 13.56          | 3795529 | 119708 | 49.71 | 2.702 | BB   |
| 2     | 29.13          | 3839309 | 59875  | 50.29 | 4.643 | BB   |

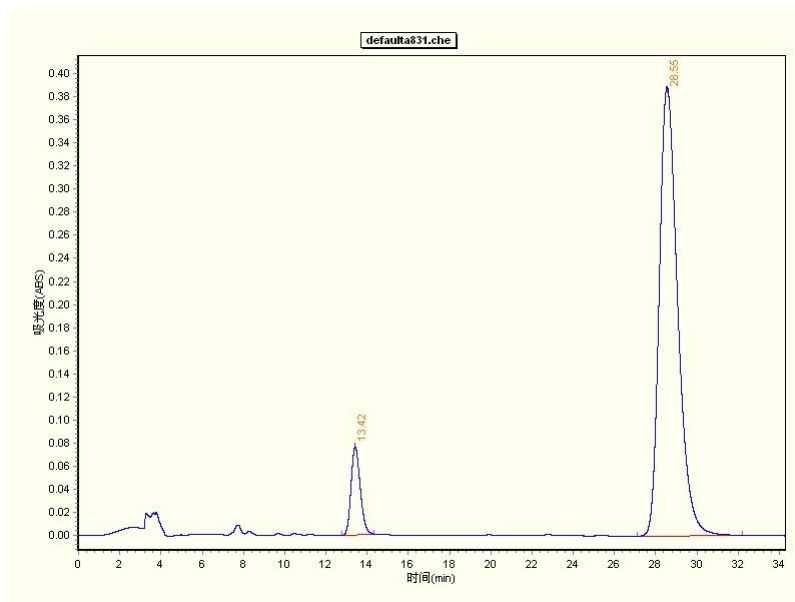

| Entry | Retention time | Area     | Height | Area% | Width | Type |
|-------|----------------|----------|--------|-------|-------|------|
| 1     | 13.42          | 1179914  | 38176  | 8.92  | 1.579 | BB   |
| 2     | 28.55          | 12046658 | 194568 | 91.08 | 5.116 | BB   |



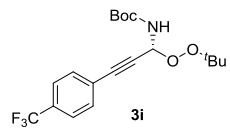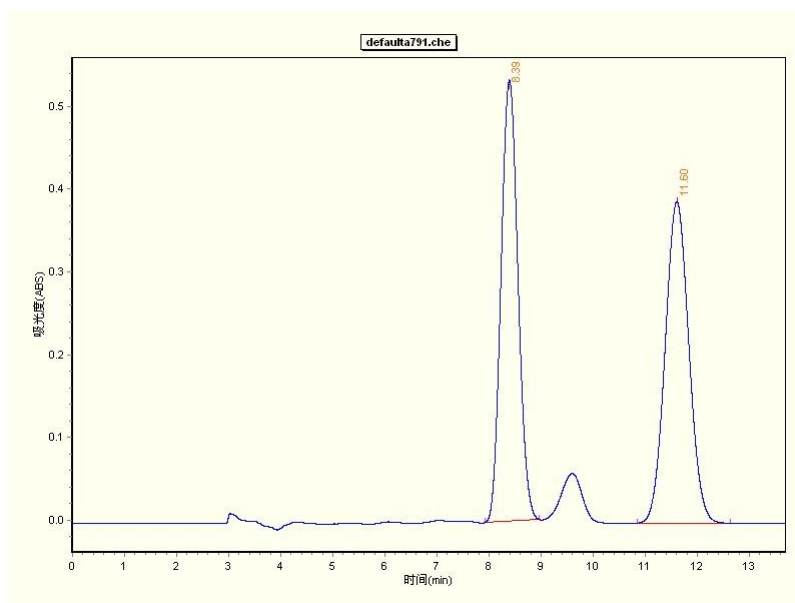

| Entry | Retention time | Area    | Height | Area% | Width | Type |
|-------|----------------|---------|--------|-------|-------|------|
| 1     | 8.39           | 6025940 | 266586 | 49.56 | 1.044 | BB   |
| 2     | 11.60          | 6131945 | 194164 | 50.44 | 1.791 | BB   |

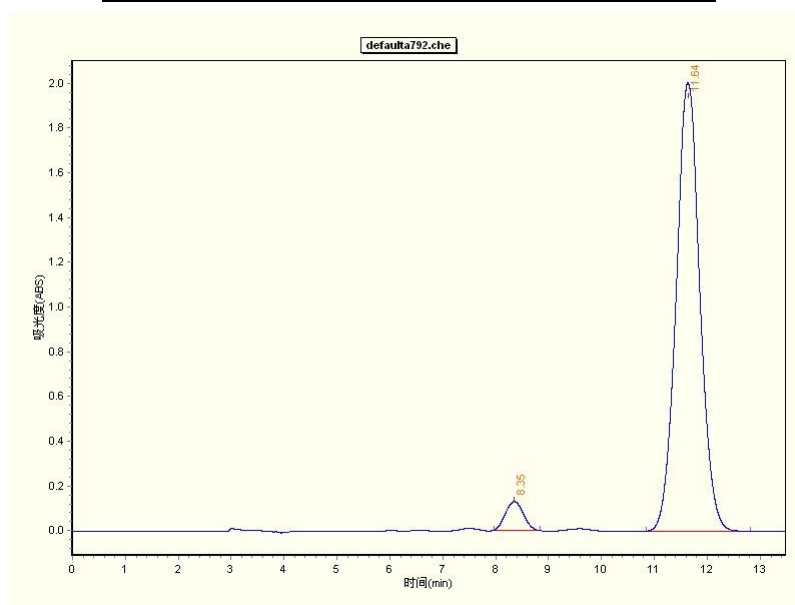

| Entry | Retention time | Area     | Height  | Area% | Width | Type |
|-------|----------------|----------|---------|-------|-------|------|
| 1     | 8.35           | 1527669  | 64434   | 4.68  | 0.885 | BB   |
| 2     | 11.64          | 31138132 | 1002283 | 95.32 | 1.977 | BB   |

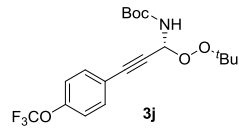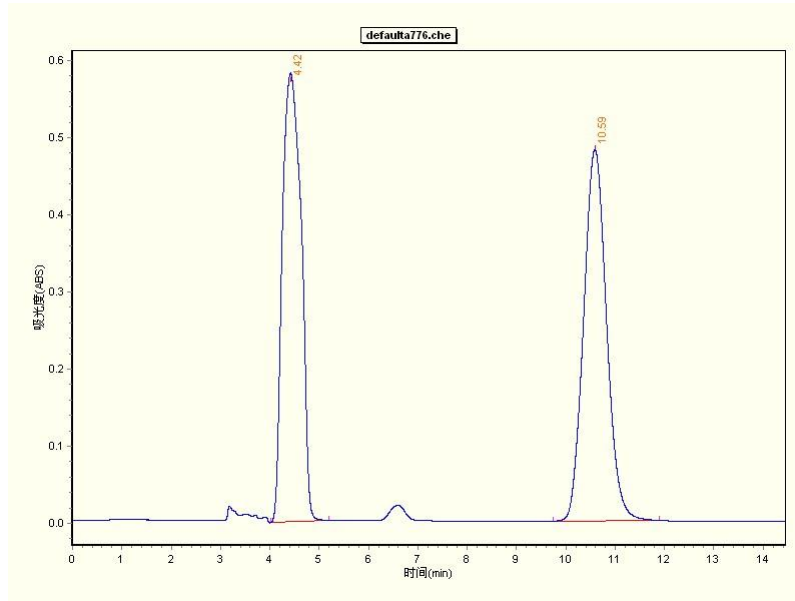

| Entry | Retention time | Area    | Height | Area% | Width | Type |
|-------|----------------|---------|--------|-------|-------|------|
| 1     | 4.42           | 7738112 | 291542 | 49.87 | 1.189 | BB   |
| 2     | 10.59          | 7777113 | 241322 | 50.13 | 2.149 | BB   |

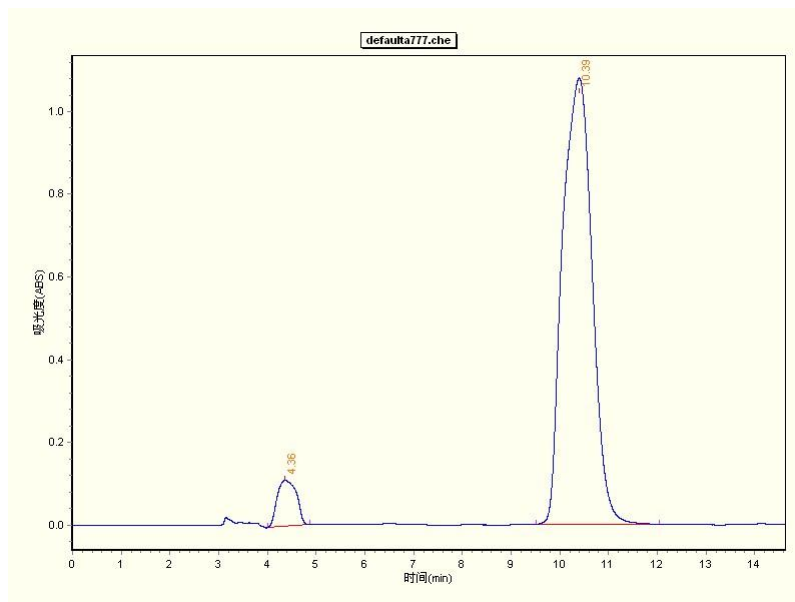

| Entry | Retention time | Area     | Height | Area% | Width | Type |
|-------|----------------|----------|--------|-------|-------|------|
| 1     | 4.36           | 1516974  | 55760  | 6.26  | 0.856 | BB   |
| 2     | 10.39          | 22722310 | 539337 | 93.74 | 2.537 | BB   |

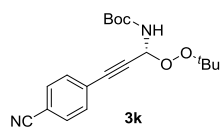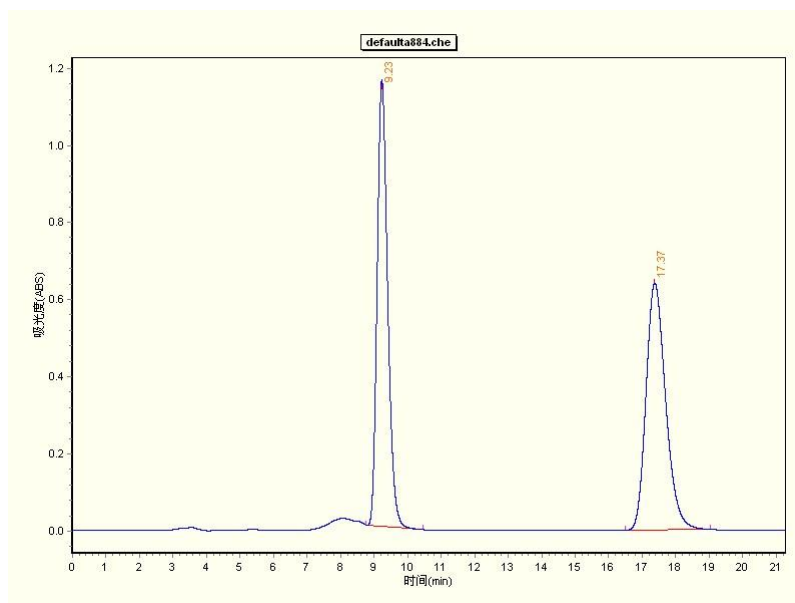

| Entry | Retention time | Area     | Height | Area% | Width | Type |
|-------|----------------|----------|--------|-------|-------|------|
| 1     | 9.23           | 12532025 | 577998 | 49.03 | 1.695 | BB   |
| 2     | 17.37          | 13029540 | 320149 | 50.97 | 2.530 | BB   |

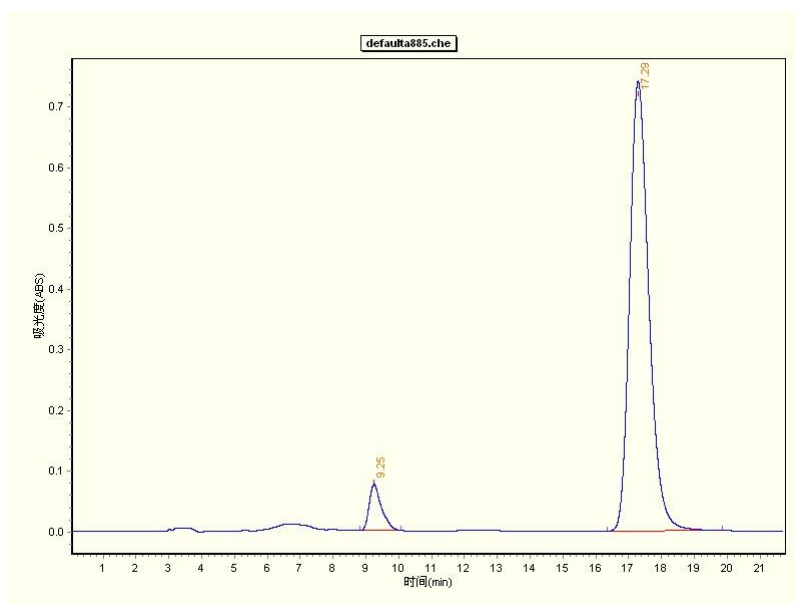

| Entry | Retention time | Area     | Height | Area% | Width | Type |
|-------|----------------|----------|--------|-------|-------|------|
| 1     | 9.25           | 993971   | 38109  | 6.20  | 1.248 | BB   |
| 2     | 17.29          | 15049998 | 370154 | 93.80 | 3.508 | BB   |

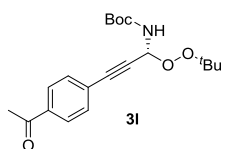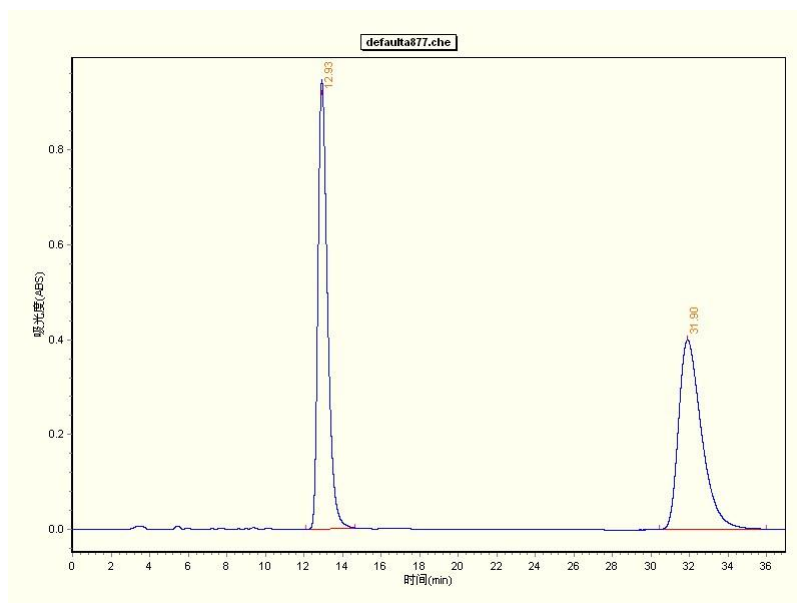

| Entry | Retention time | Area     | Height | Area% | Width | Type |
|-------|----------------|----------|--------|-------|-------|------|
| 1     | 12.93          | 16216567 | 473300 | 49.46 | 2.566 | BB   |
| 2     | 31.90          | 16568516 | 199958 | 50.54 | 5.571 | BB   |

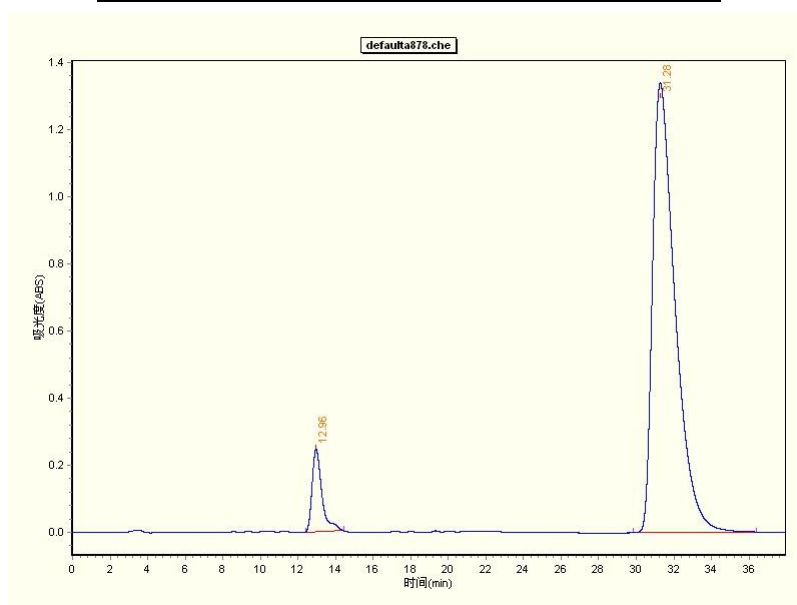

| Entry | Retention time | Area     | Height | Area% | Width | Type |
|-------|----------------|----------|--------|-------|-------|------|
| 1     | 12.96          | 4488181  | 122824 | 7.45  | 2.020 | BB   |
| 2     | 31.28          | 55790503 | 670010 | 92.55 | 6.543 | BB   |

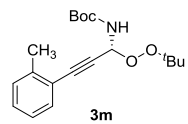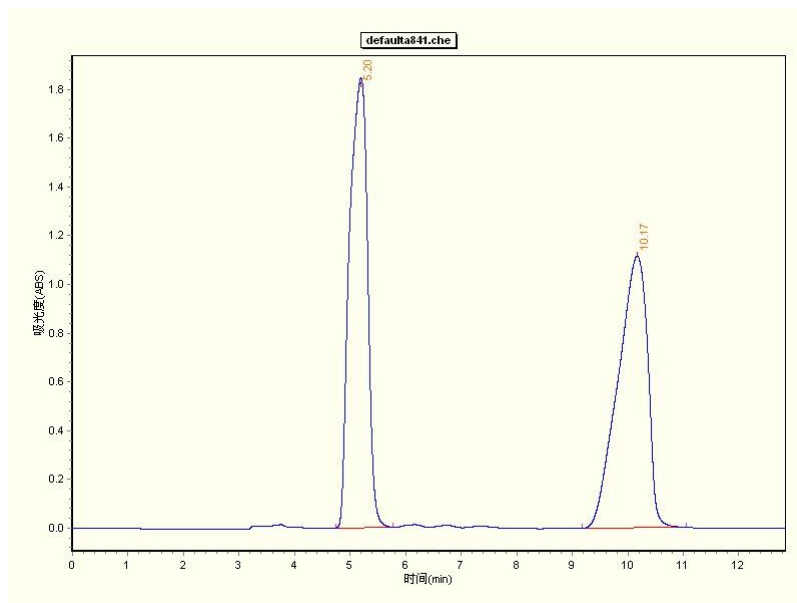

| Entry | Retention time | Area     | Height | Area% | Width | Type |
|-------|----------------|----------|--------|-------|-------|------|
| 1     | 5.20           | 20815849 | 922013 | 50.07 | 1.030 | BB   |
| 2     | 10.17          | 20760499 | 557557 | 49.93 | 1.870 | BB   |

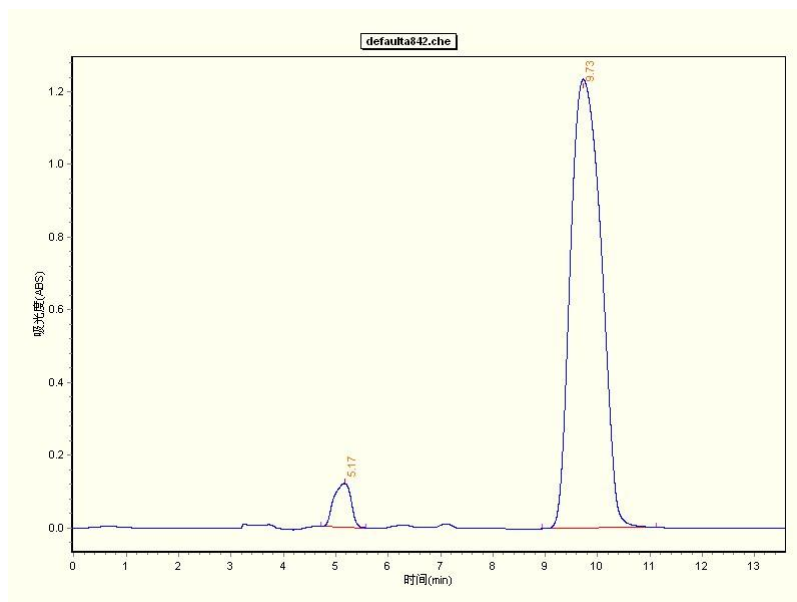

| Entry | Retention time | Area     | Height | Area% | Width | Type |
|-------|----------------|----------|--------|-------|-------|------|
| 1     | 5.17           | 1347345  | 59654  | 5.10  | 0.850 | BB   |
| 2     | 9.73           | 25070532 | 616917 | 94.90 | 2.173 | BB   |

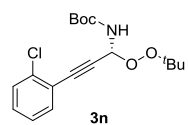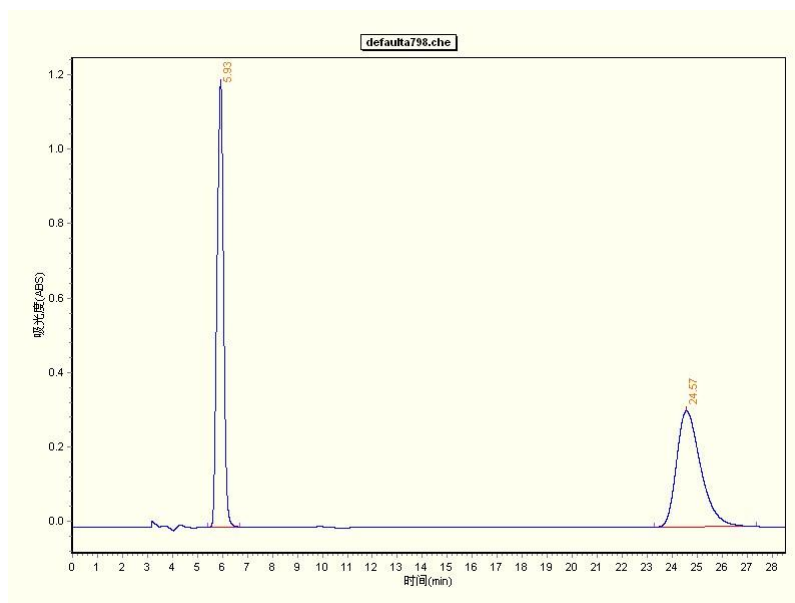

| Entry | Retention time | Area     | Height | Area% | Width | Type |
|-------|----------------|----------|--------|-------|-------|------|
| 1     | 5.93           | 10820196 | 600121 | 50.66 | 1.290 | BB   |
| 2     | 24.57          | 10536706 | 156180 | 49.34 | 4.073 | BB   |

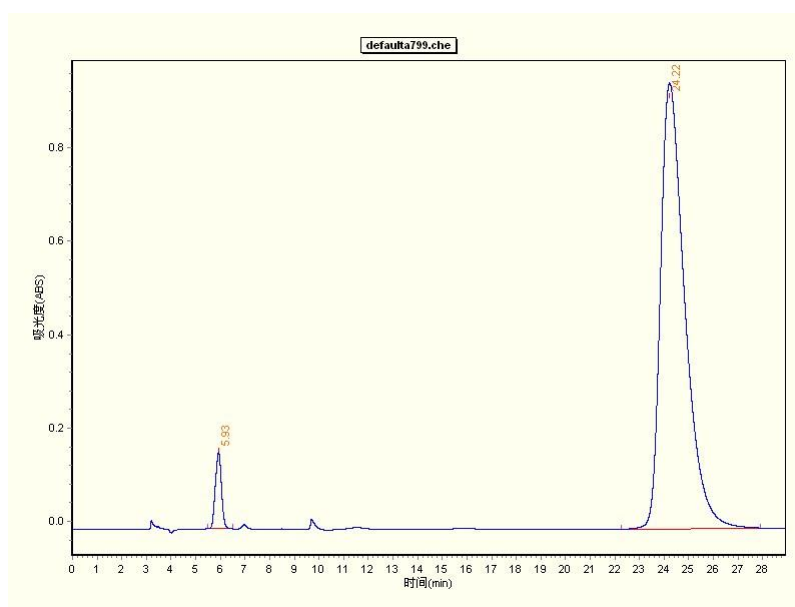

| Entry | Retention time | Area     | Height | Area% | Width | Type |
|-------|----------------|----------|--------|-------|-------|------|
| 1     | 5.93           | 1408840  | 81295  | 4.15  | 1.032 | BB   |
| 2     | 24.22          | 32563273 | 476403 | 95.85 | 5.642 | BB   |

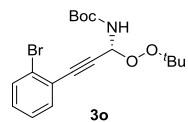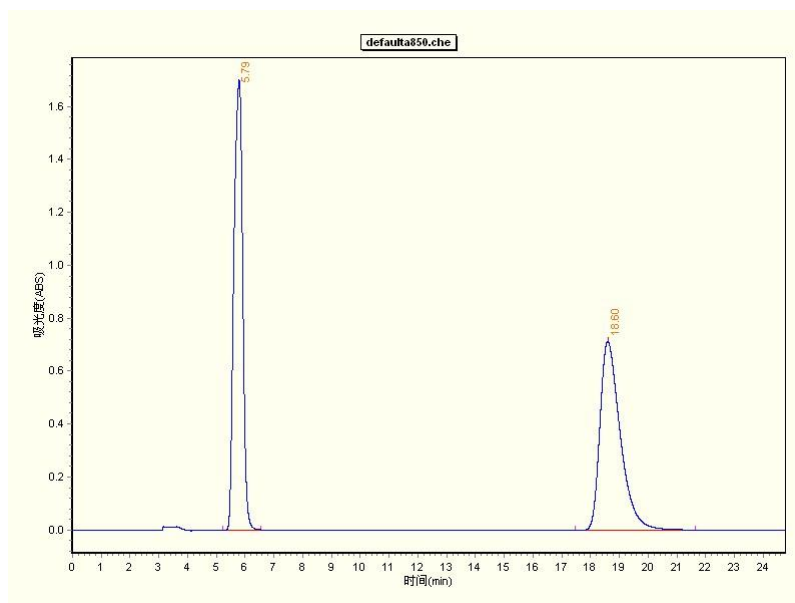

| Entry | Retention time | Area     | Height | Area% | Width | Type |
|-------|----------------|----------|--------|-------|-------|------|
| 1     | 5.79           | 18000276 | 850218 | 50.67 | 1.351 | BB   |
| 2     | 18.60          | 17522051 | 356892 | 49.33 | 4.149 | BB   |

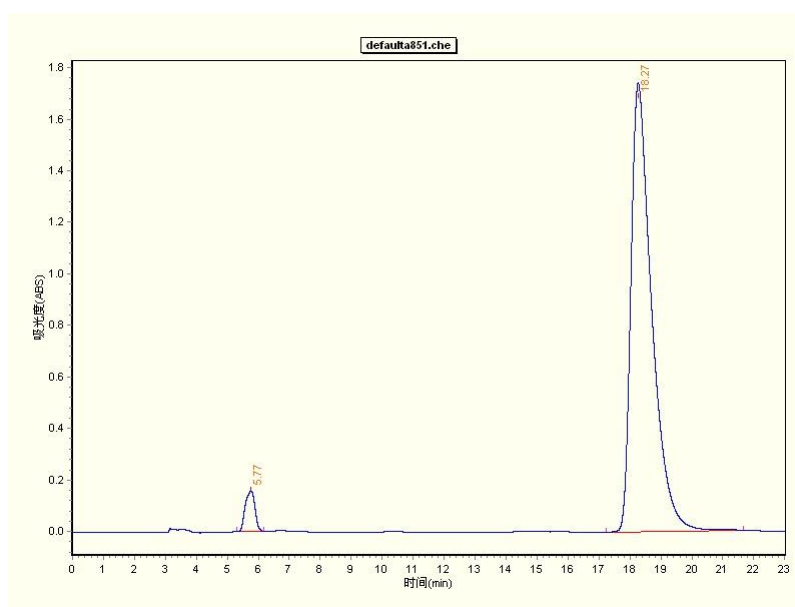

| Entry | Retention time | Area     | Height | Area% | Width | Type |
|-------|----------------|----------|--------|-------|-------|------|
| 1     | 5.77           | 1706660  | 77881  | 4.05  | 0.844 | BB   |
| 2     | 18.27          | 40393317 | 870572 | 95.95 | 4.427 | BB   |

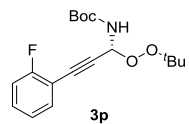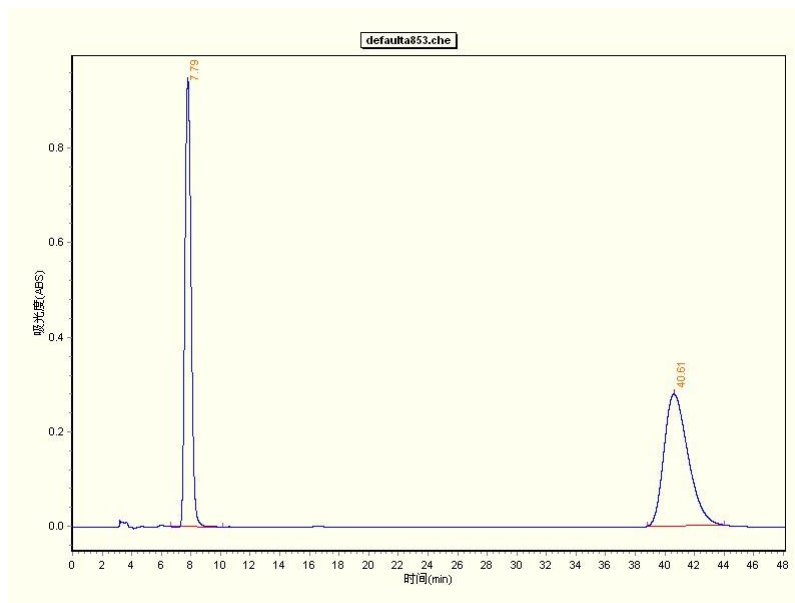

| Entry | Retention time | Area     | Height | Area% | Width | Type |
|-------|----------------|----------|--------|-------|-------|------|
| 1     | 7.79           | 13709906 | 474291 | 46.47 | 3.531 | BB   |
| 2     | 40.61          | 15792885 | 139515 | 53.53 | 5.248 | BB   |

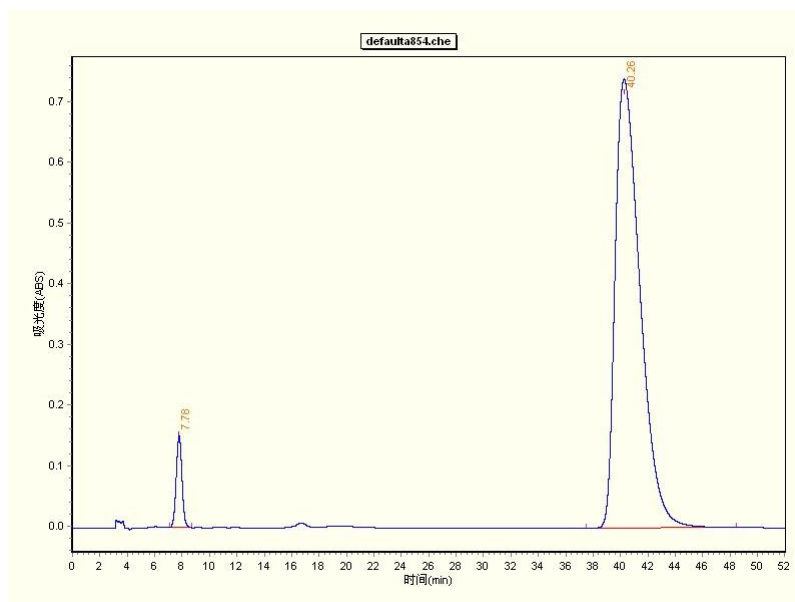

| Entry | Retention time | Area     | Height | Area% | Width  | Type |
|-------|----------------|----------|--------|-------|--------|------|
| 1     | 7.78           | 2213968  | 75553  | 4.53  | 4.548  | BB   |
| 2     | 40.26          | 46635735 | 369756 | 95.47 | 10.934 | BB   |



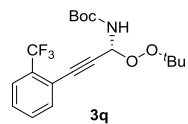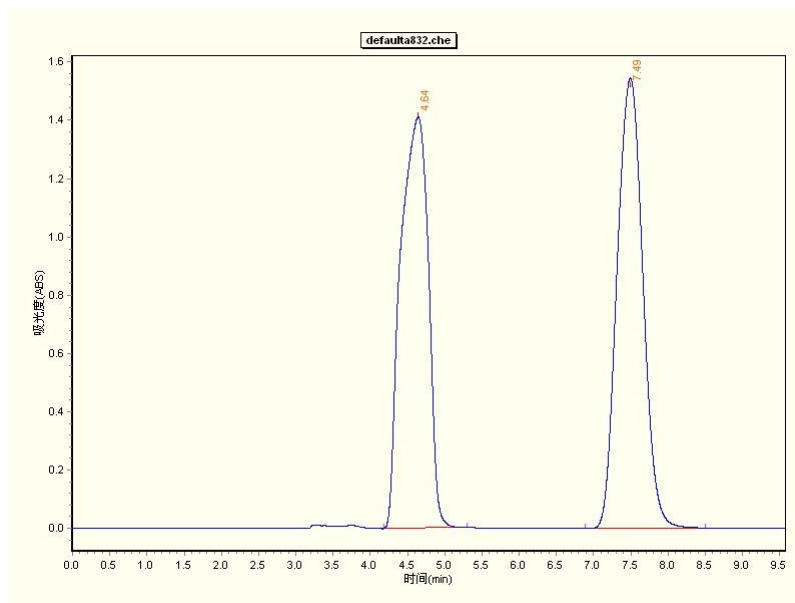

| Entry | Retention time | Area     | Height | Area% | Width | Type |
|-------|----------------|----------|--------|-------|-------|------|
| 1     | 4.64           | 18202619 | 705163 | 49.52 | 1.116 | BB   |
| 2     | 7.49           | 18556755 | 772074 | 50.48 | 1.606 | BB   |

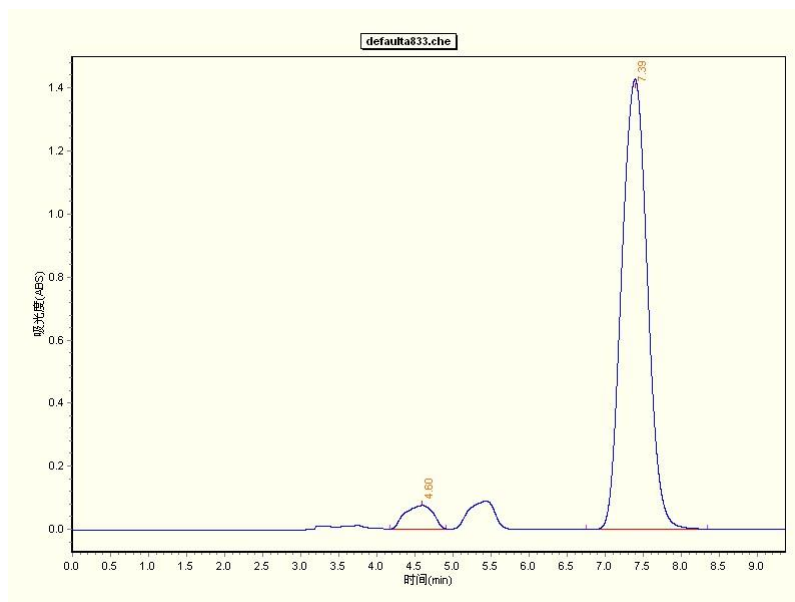

| Entry | Retention time | Area     | Height | Area% | Width | Type |
|-------|----------------|----------|--------|-------|-------|------|
| 1     | 4.60           | 952693   | 37085  | 5.41  | 0.747 | BB   |
| 2     | 7.39           | 16660627 | 713359 | 94.59 | 1.593 | BB   |

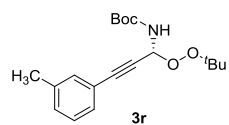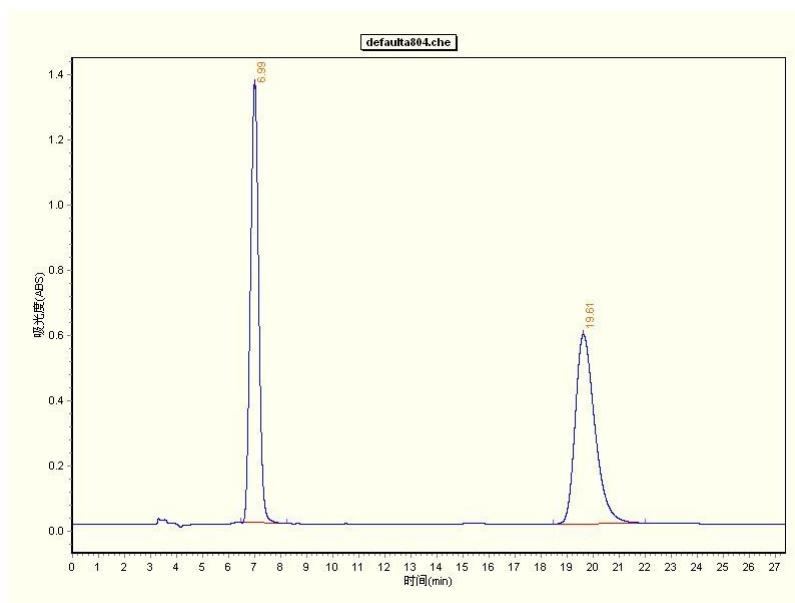

| Entry | Retention time | Area     | Height | Area% | Width | Type |
|-------|----------------|----------|--------|-------|-------|------|
| 1     | 6.99           | 14771902 | 678919 | 49.41 | 1.763 | BB   |
| 2     | 19.61          | 15124083 | 290460 | 50.59 | 3.553 | BB   |

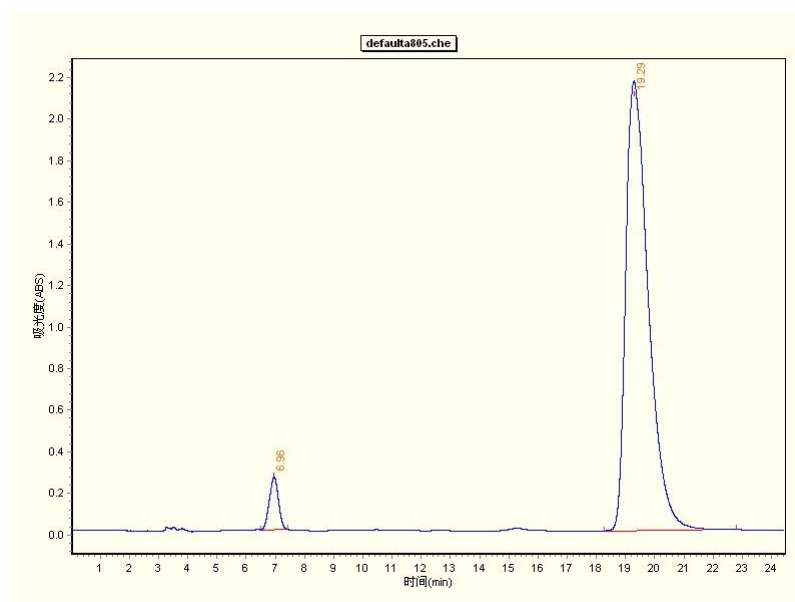

| Entry | Retention time | Area     | Height  | Area% | Width | Type |
|-------|----------------|----------|---------|-------|-------|------|
| 1     | 6.96           | 2722215  | 126246  | 4.48  | 0.897 | BB   |
| 2     | 19.29          | 58099962 | 1079898 | 95.52 | 4.553 | BB   |

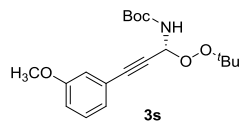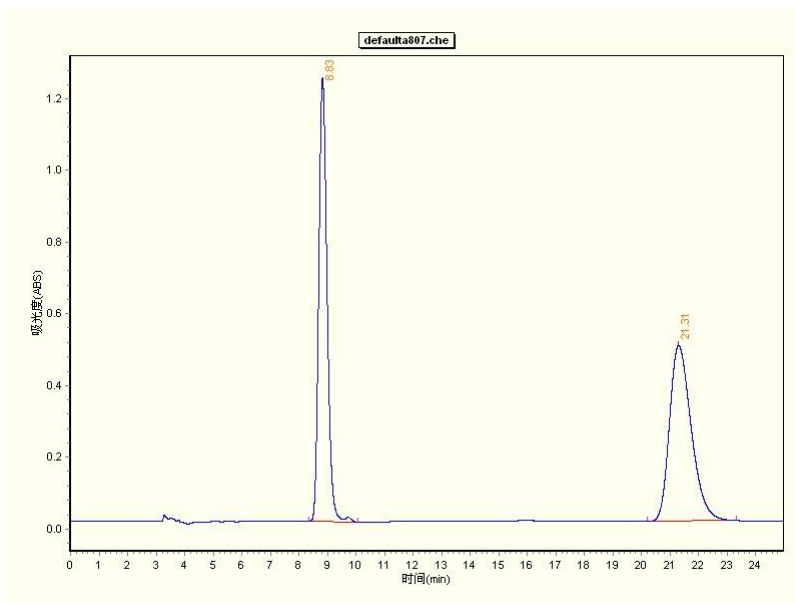

| Entry | Retention time | Area     | Height | Area% | Width | Type |
|-------|----------------|----------|--------|-------|-------|------|
| 1     | 8.83           | 12552145 | 618835 | 49.12 | 1.708 | BB   |
| 2     | 21.31          | 13002713 | 245436 | 50.88 | 3.119 | BB   |

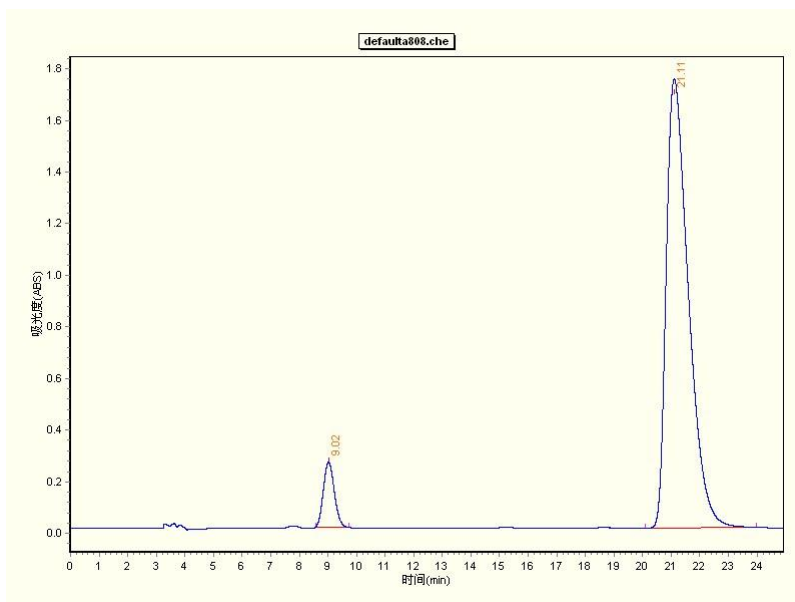

| Entry | Retention time | Area     | Height | Area% | Width | Type |
|-------|----------------|----------|--------|-------|-------|------|
| 1     | 9.02           | 3351692  | 126183 | 6.69  | 1.162 | BB   |
| 2     | 21.11          | 46772600 | 869324 | 93.31 | 3.878 | BB   |

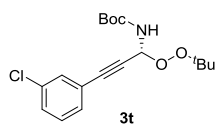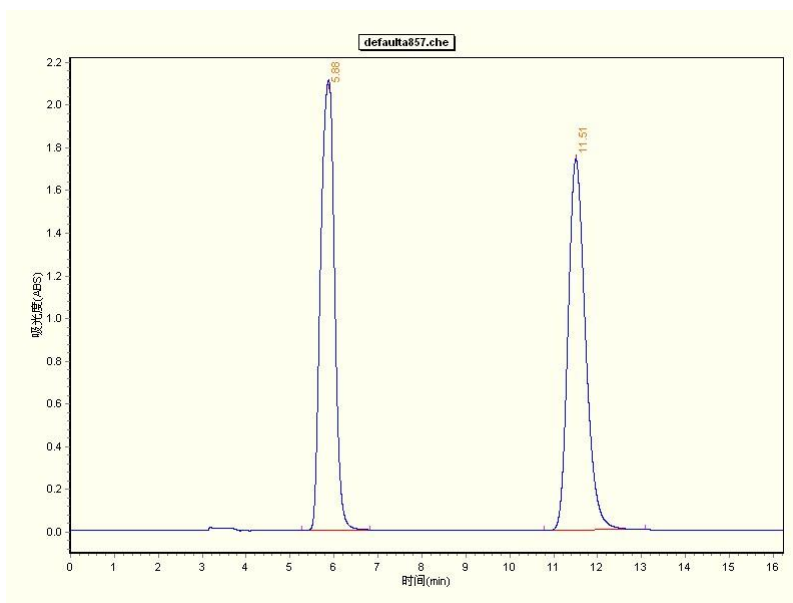

| Entry | Retention time | Area     | Height  | Area% | Width | Type |
|-------|----------------|----------|---------|-------|-------|------|
| 1     | 5.88           | 23040545 | 1053499 | 49.10 | 1.528 | BB   |
| 2     | 11.51          | 23880639 | 869649  | 50.90 | 2.316 | BB   |

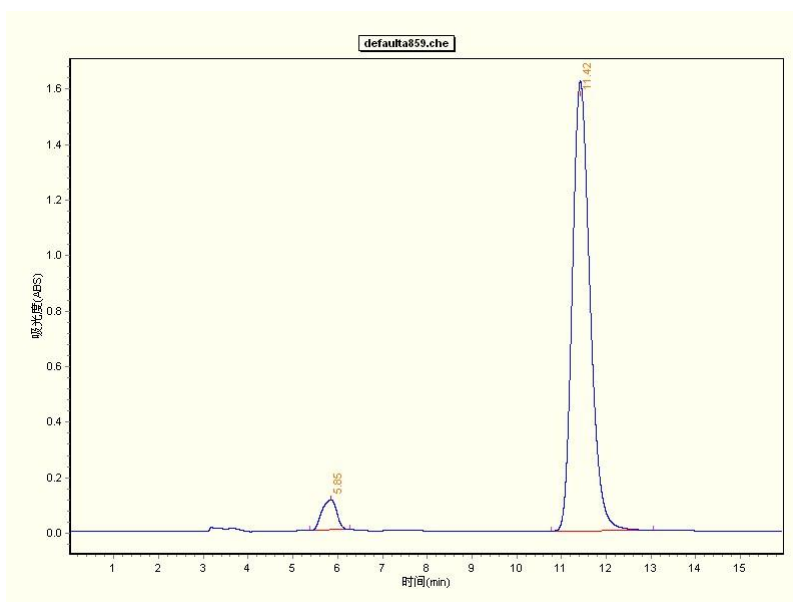

| Entry | Retention time | Area     | Height | Area% | Width | Type |
|-------|----------------|----------|--------|-------|-------|------|
| 1     | 5.85           | 1247563  | 54033  | 5.33  | 0.891 | BB   |
| 2     | 11.42          | 22157128 | 809603 | 94.67 | 2.292 | BB   |

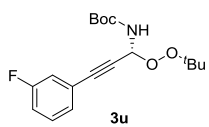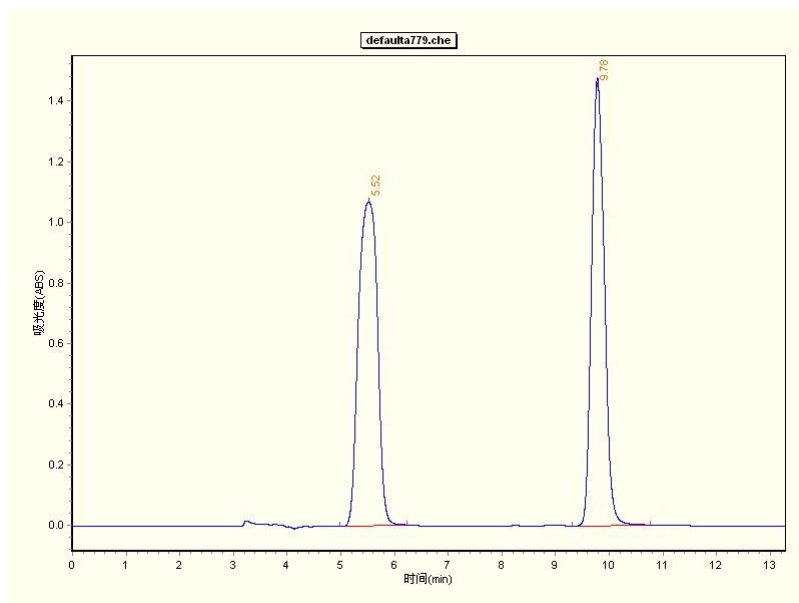

| Entry | Retention time | Area     | Height | Area% | Width | Type |
|-------|----------------|----------|--------|-------|-------|------|
| 1     | 5.52           | 13136234 | 534868 | 51.90 | 1.264 | BB   |
| 2     | 9.78           | 12172193 | 738658 | 48.10 | 1.462 | BB   |

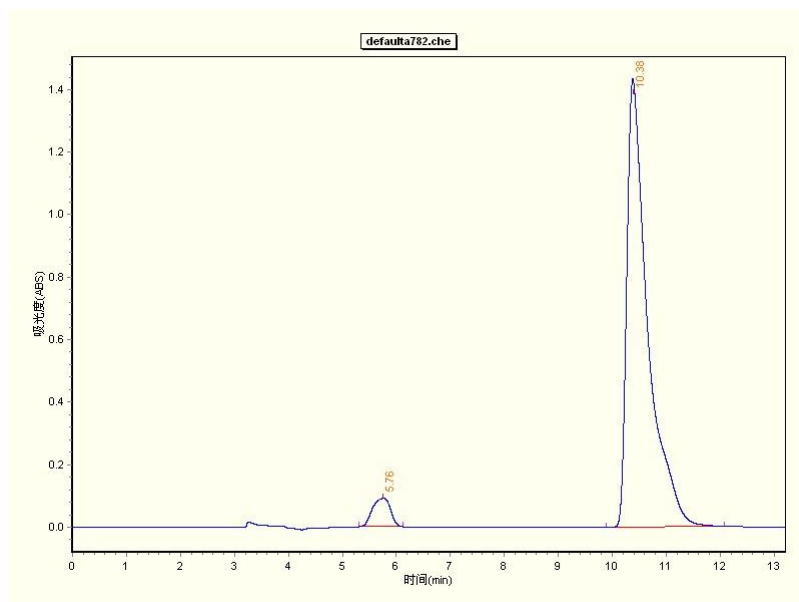

| Entry | Retention time | Area     | Height | Area% | Width | Type |
|-------|----------------|----------|--------|-------|-------|------|
| 1     | 5.76           | 1045119  | 45303  | 5.17  | 0.798 | BB   |
| 2     | 10.38          | 19170543 | 716611 | 94.83 | 2.173 | BB   |

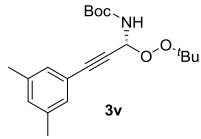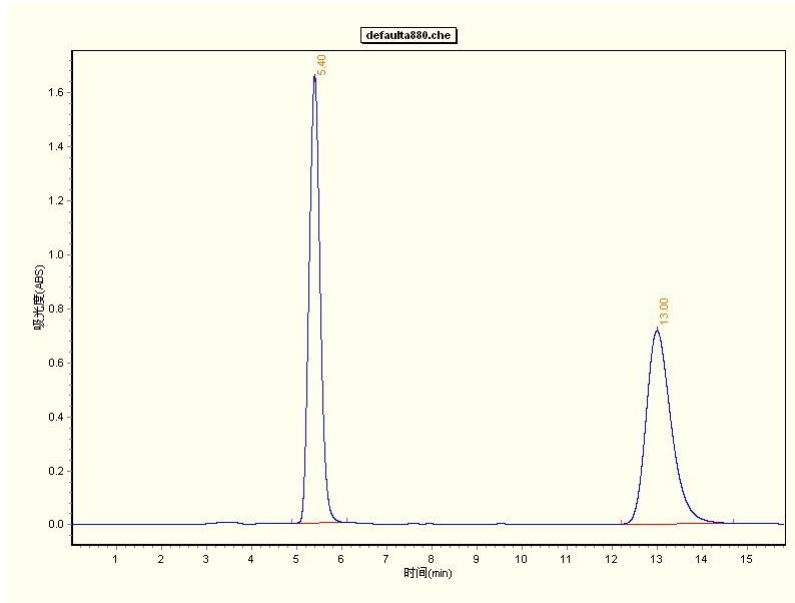

| Entry | Retention time | Area     | Height | Area% | Width | Type |
|-------|----------------|----------|--------|-------|-------|------|
| 1     | 5.40           | 14054940 | 829681 | 50.37 | 1.224 | BB   |
| 2     | 13.00          | 13849656 | 357561 | 49.63 | 2.495 | BB   |

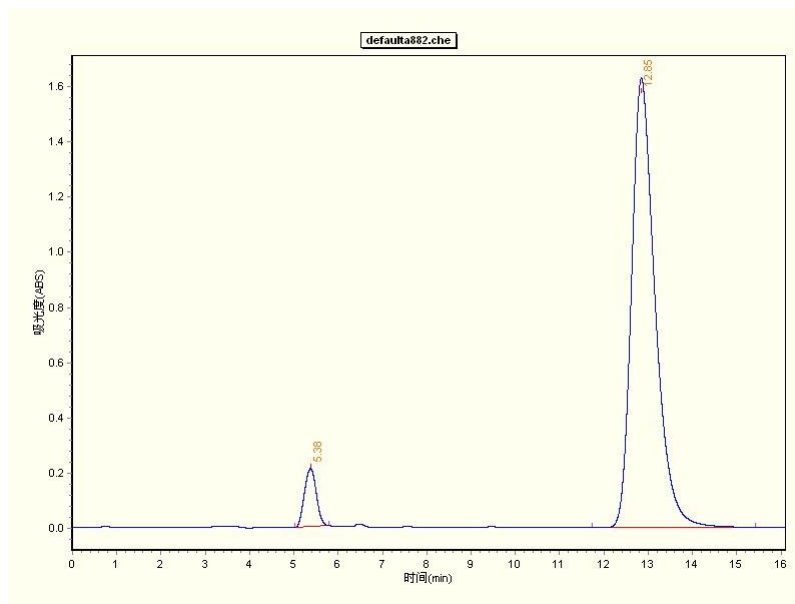

| Entry | Retention time | Area     | Height | Area% | Width | Type |
|-------|----------------|----------|--------|-------|-------|------|
| 1     | 5.38           | 1958669  | 105143 | 6.13  | 0.782 | BB   |
| 2     | 12.85          | 30001825 | 813765 | 93.87 | 3.702 | BB   |

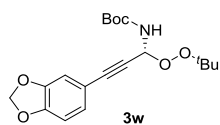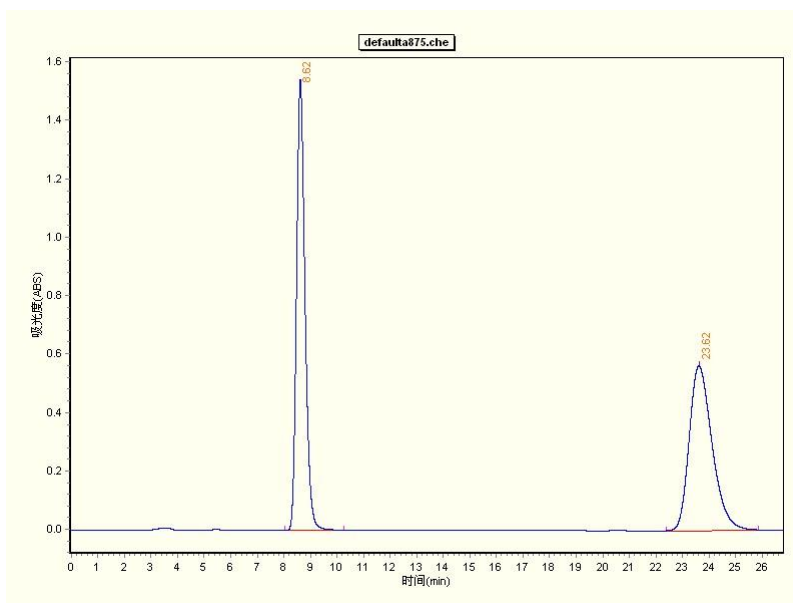

| Entry | Retention time | Area     | Height | Area% | Width | Type |
|-------|----------------|----------|--------|-------|-------|------|
| 1     | 8.62           | 16990933 | 769520 | 50.28 | 2.223 | BB   |
| 2     | 23.62          | 16800591 | 281491 | 49.72 | 3.483 | BB   |

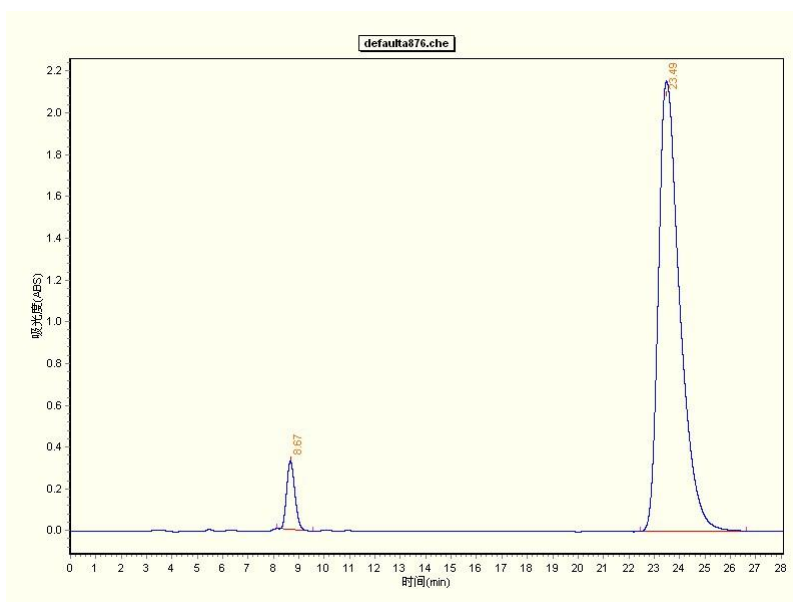

| Entry | Retention time | Area     | Height  | Area% | Width | Type |
|-------|----------------|----------|---------|-------|-------|------|
| 1     | 8.67           | 3704873  | 163850  | 5.55  | 1.420 | BB   |
| 2     | 23.49          | 63098099 | 1077646 | 94.45 | 4.177 | BB   |

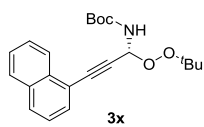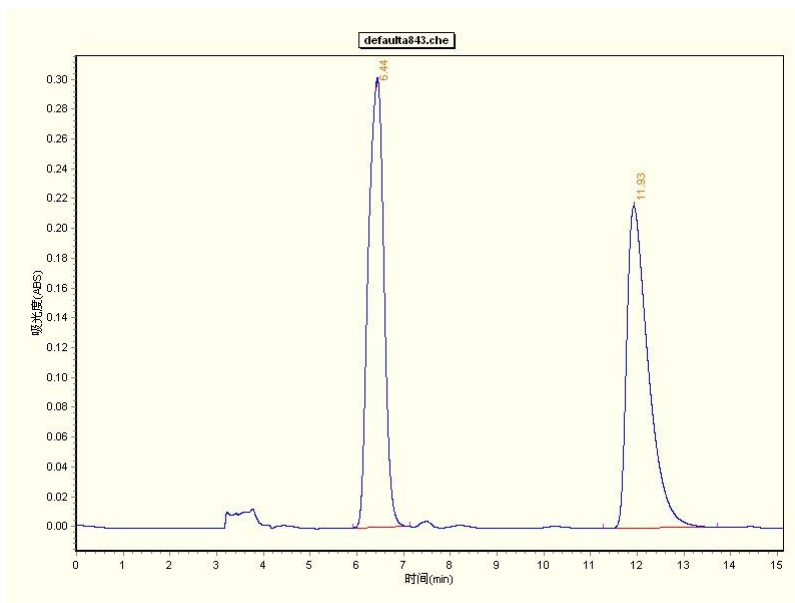

| Entry | Retention time | Area    | Height | Area% | Width | Type |
|-------|----------------|---------|--------|-------|-------|------|
| 1     | 6.44           | 3477413 | 150652 | 50.10 | 1.213 | BB   |
| 2     | 11.93          | 3463812 | 108100 | 49.90 | 2.444 | BB   |

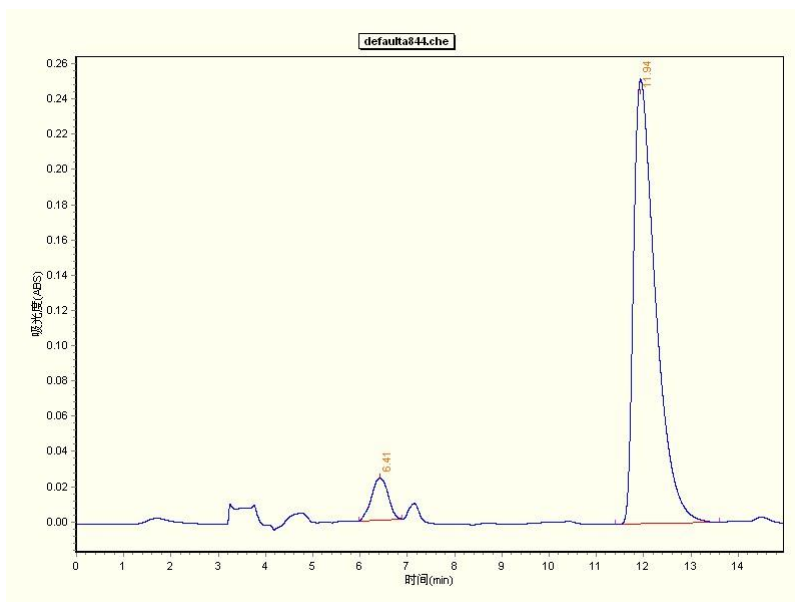

| Entry | Retention time | Area    | Height | Area% | Width | Type |
|-------|----------------|---------|--------|-------|-------|------|
| 1     | 6.41           | 289685  | 11842  | 6.62  | 0.910 | BB   |
| 2     | 11.94          | 4085960 | 126238 | 93.38 | 2.192 | BB   |



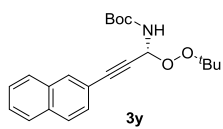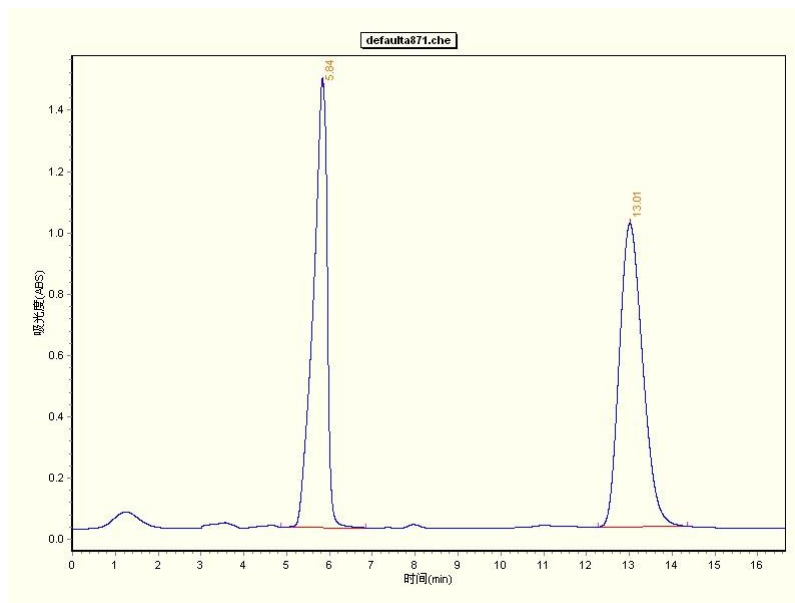

| Entry | Retention time | Area     | Height | Area% | Width | Type |
|-------|----------------|----------|--------|-------|-------|------|
| 1     | 5.84           | 16554146 | 733430 | 46.96 | 1.979 | BB   |
| 2     | 13.01          | 18700321 | 495006 | 53.04 | 2.078 | BB   |

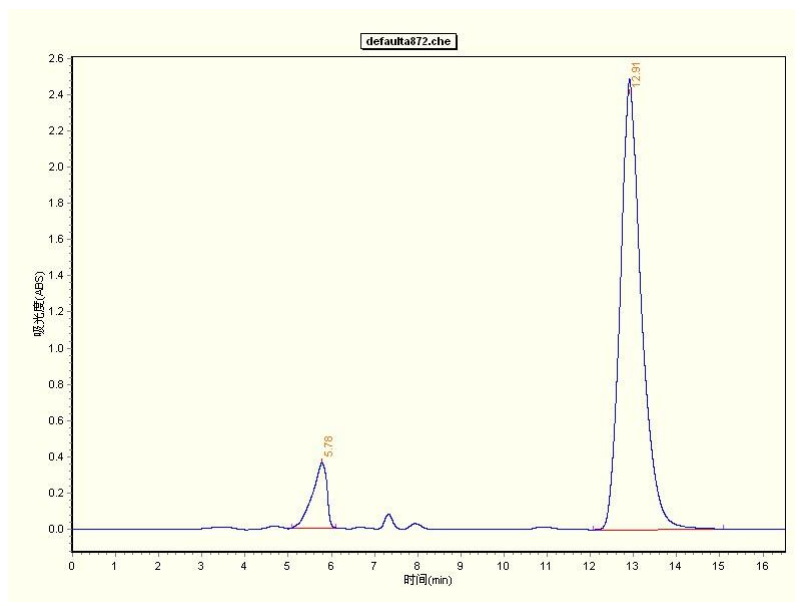

| Entry | Retention time | Area     | Height  | Area% | Width | Type |
|-------|----------------|----------|---------|-------|-------|------|
| 1     | 5.78           | 4194206  | 178346  | 9.01  | 1.022 | BB   |
| 2     | 12.91          | 42366344 | 1242389 | 90.99 | 3.026 | BB   |

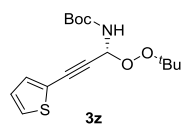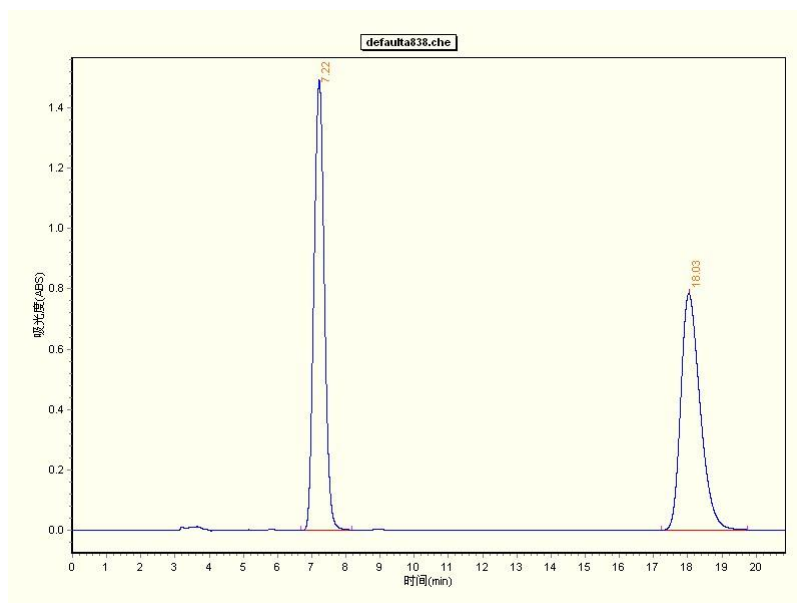

| Entry | Retention time | Area     | Height | Area% | Width | Type |
|-------|----------------|----------|--------|-------|-------|------|
| 1     | 7.22           | 15733076 | 745610 | 50.60 | 1.488 | BB   |
| 2     | 18.03          | 15359638 | 392742 | 49.40 | 2.523 | BB   |

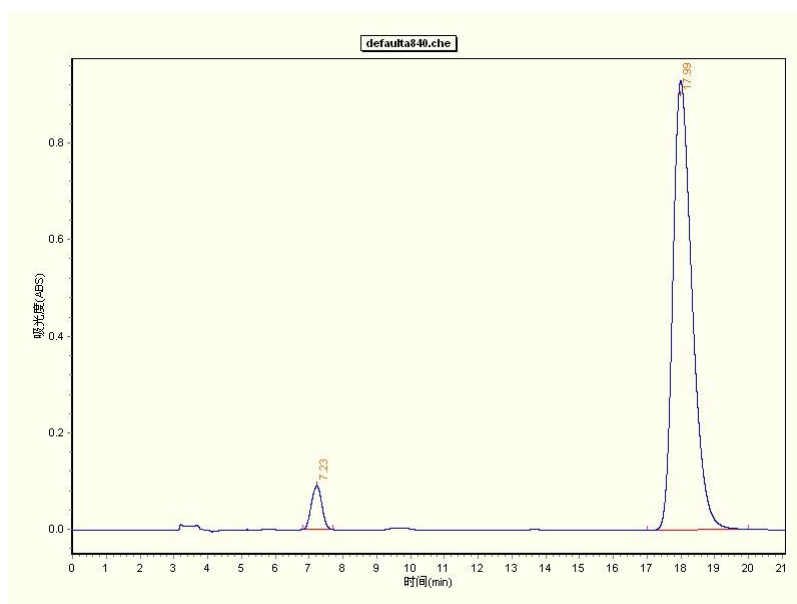

| Entry | Retention time | Area     | Height | Area% | Width | Type |
|-------|----------------|----------|--------|-------|-------|------|
| 1     | 7.23           | 969994   | 45120  | 5.04  | 0.878 | BB   |
| 2     | 17.99          | 18268271 | 464228 | 94.96 | 2.989 | BB   |

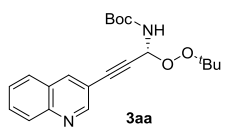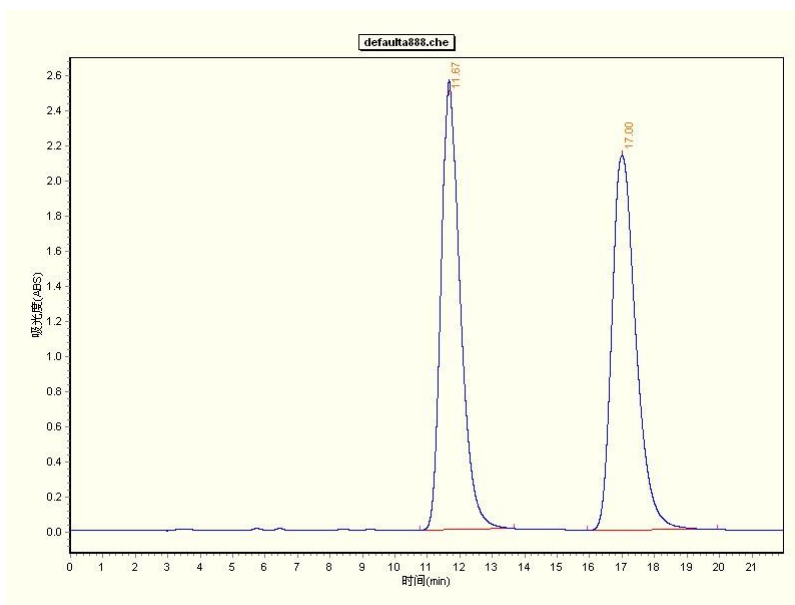

| Entry | Retention time | Area     | Height  | Area% | Width | Type |
|-------|----------------|----------|---------|-------|-------|------|
| 1     | 11.67          | 52729123 | 1278594 | 49.04 | 2.896 | BB   |
| 2     | 17.00          | 54794459 | 1065647 | 50.96 | 4.007 | BB   |

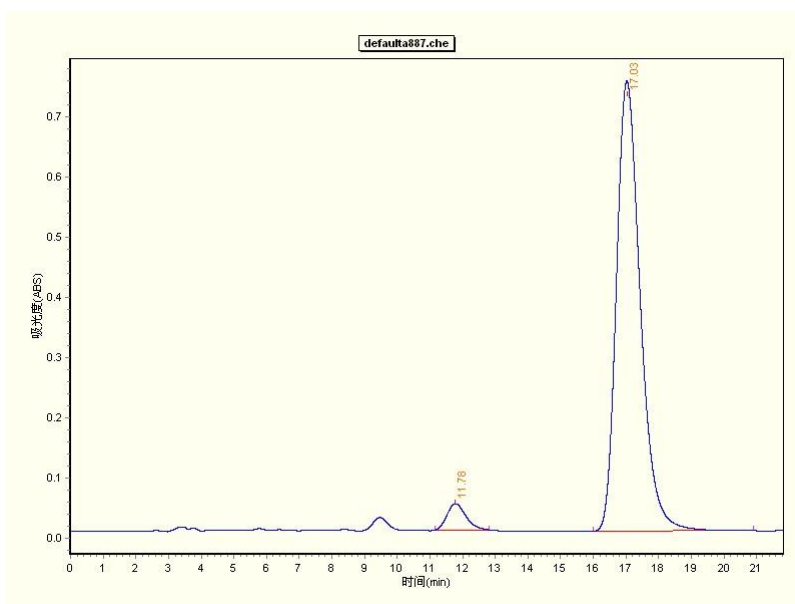

| Entry | Retention time | Area     | Height | Area% | Width | Type |
|-------|----------------|----------|--------|-------|-------|------|
| 1     | 11.78          | 881513   | 21861  | 4.45  | 1.666 | BB   |
| 2     | 17.03          | 18933290 | 373695 | 95.55 | 4.888 | BB   |

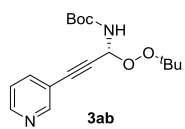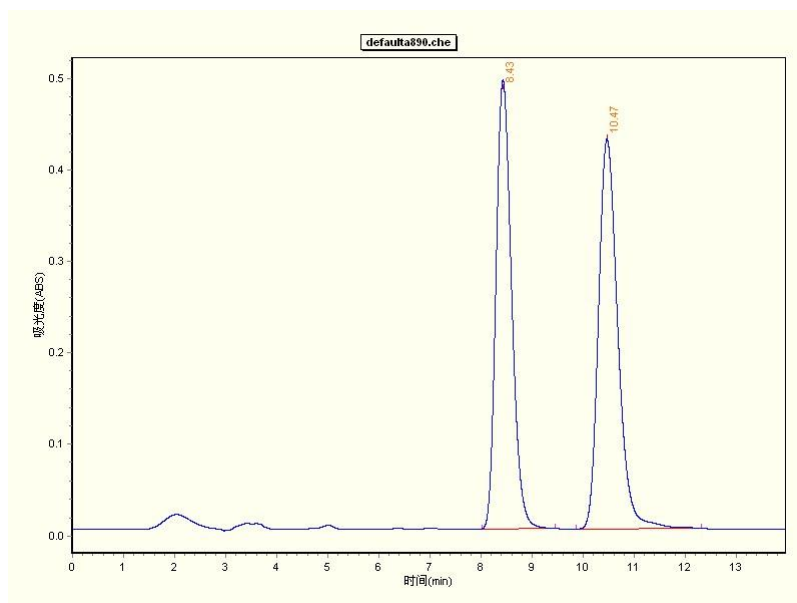

| Entry | Retention time | Area    | Height | Area% | Width | Type |
|-------|----------------|---------|--------|-------|-------|------|
| 1     | 8.43           | 5204531 | 245289 | 48.18 | 1.439 | BB   |
| 2     | 10.47          | 5597415 | 213006 | 51.82 | 2.449 | BB   |

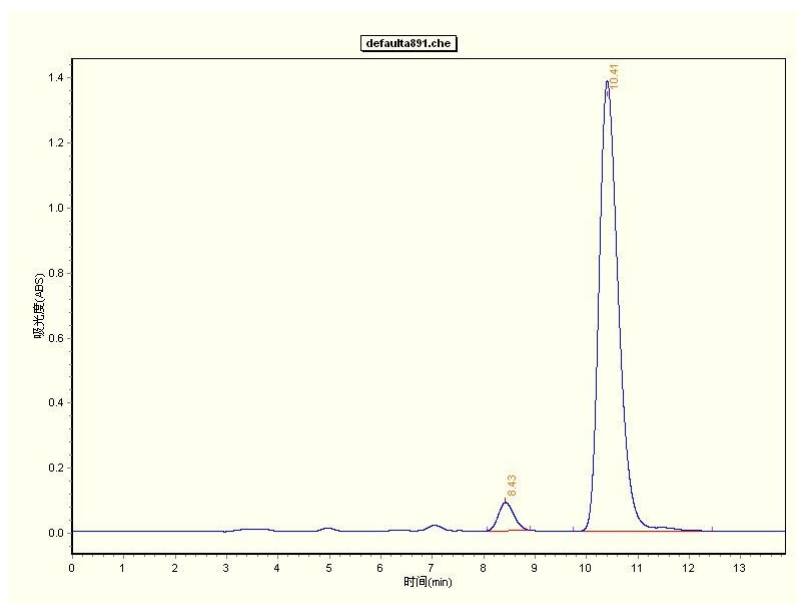

| Entry | Retention time | Area     | Height | Area% | Width | Type |
|-------|----------------|----------|--------|-------|-------|------|
| 1     | 8.43           | 897173   | 43169  | 4.74  | 0.838 | BB   |
| 2     | 10.41          | 18040978 | 694496 | 95.26 | 2.709 | BB   |

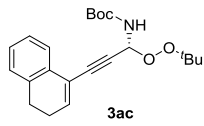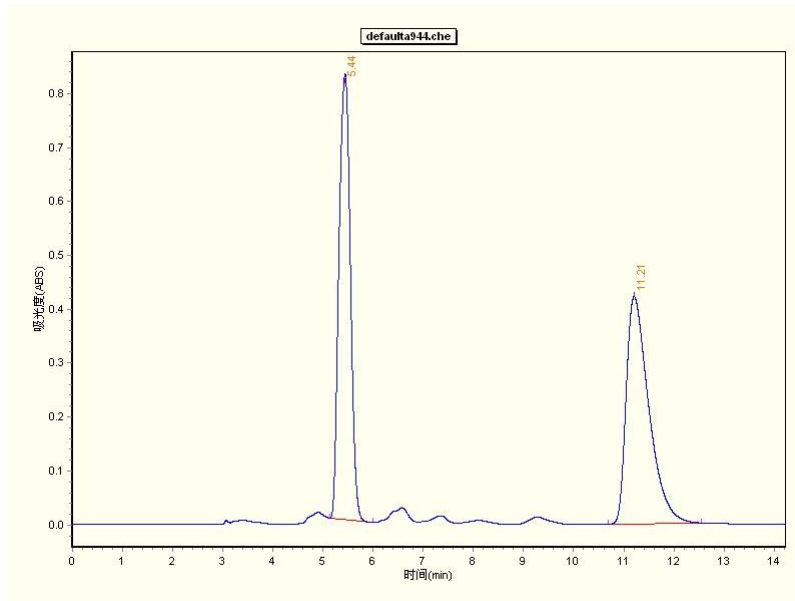

| Entry | Retention time | Area    | Height | Area% | Width | Type |
|-------|----------------|---------|--------|-------|-------|------|
| 1     | 5.44           | 6528822 | 413562 | 49.69 | 0.860 | BB   |
| 2     | 11.21          | 6611568 | 211030 | 50.31 | 1.862 | BB   |

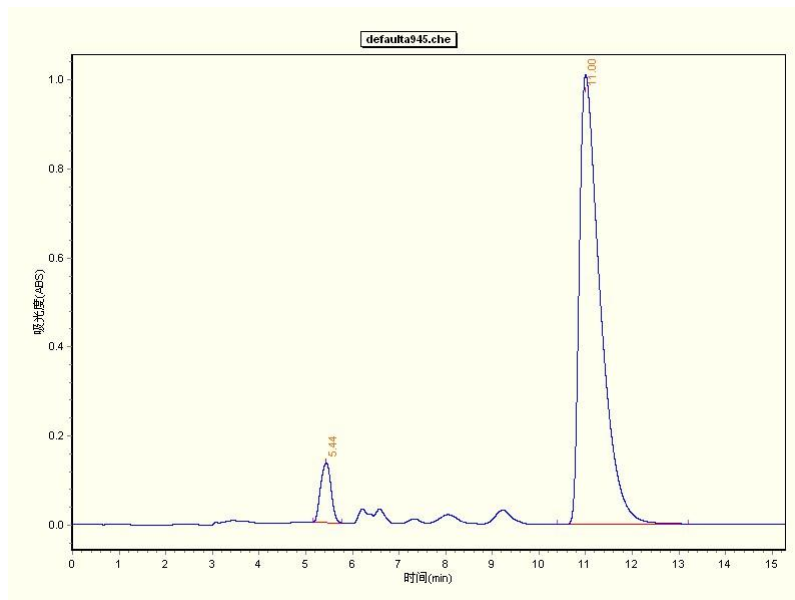

| Entry | Retention time | Area     | Height | Area% | Width | Type |
|-------|----------------|----------|--------|-------|-------|------|
| 1     | 5.44           | 1043292  | 67259  | 6.21  | 0.621 | BB   |
| 2     | 11.00          | 15766441 | 506100 | 93.79 | 2.803 | BB   |

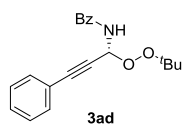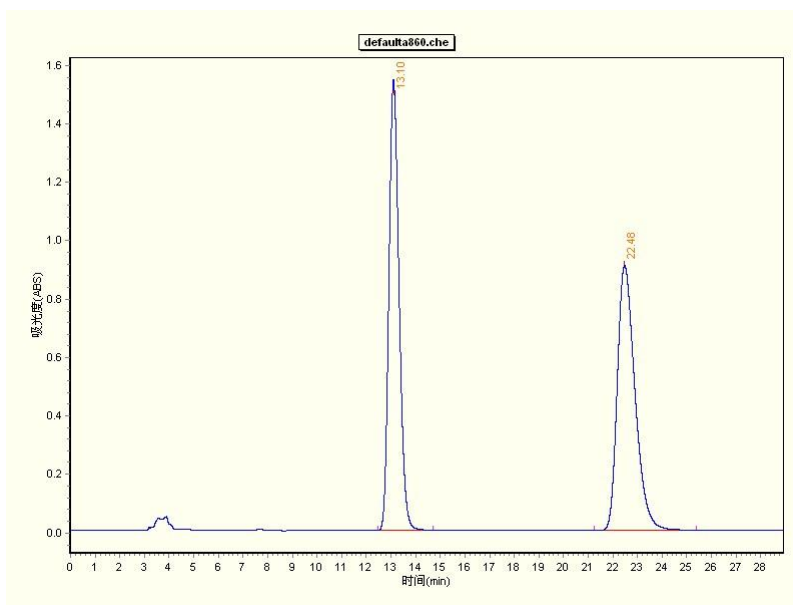

| Entry | Retention time | Area     | Height | Area% | Width | Type |
|-------|----------------|----------|--------|-------|-------|------|
| 1     | 13.10          | 21998816 | 770133 | 49.35 | 2.236 | BB   |
| 2     | 22.48          | 22578704 | 453168 | 50.65 | 4.156 | BB   |

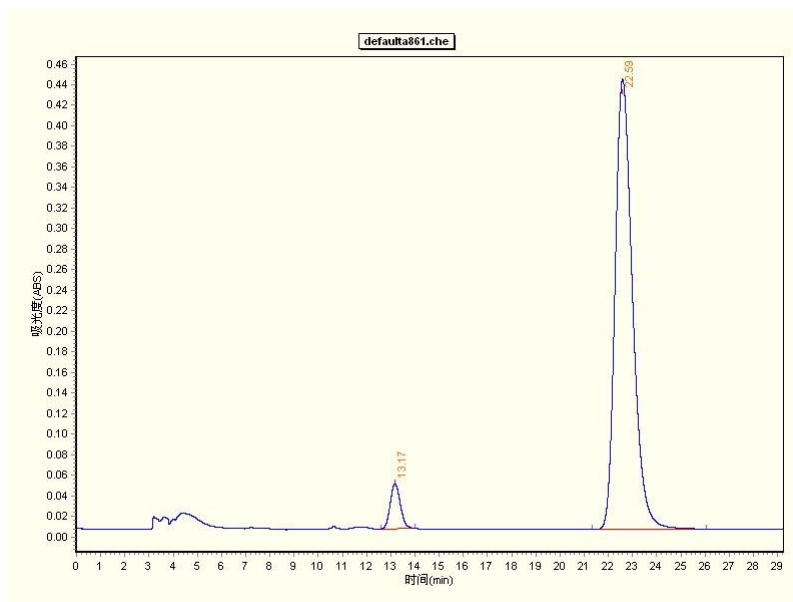

| Entry | Retention time | Area     | Height | Area% | Width | Type |
|-------|----------------|----------|--------|-------|-------|------|
| 1     | 13.17          | 632344   | 21830  | 5.46  | 1.399 | BB   |
| 2     | 22.59          | 10950558 | 219050 | 94.54 | 4.752 | BB   |

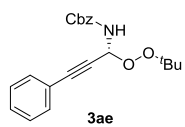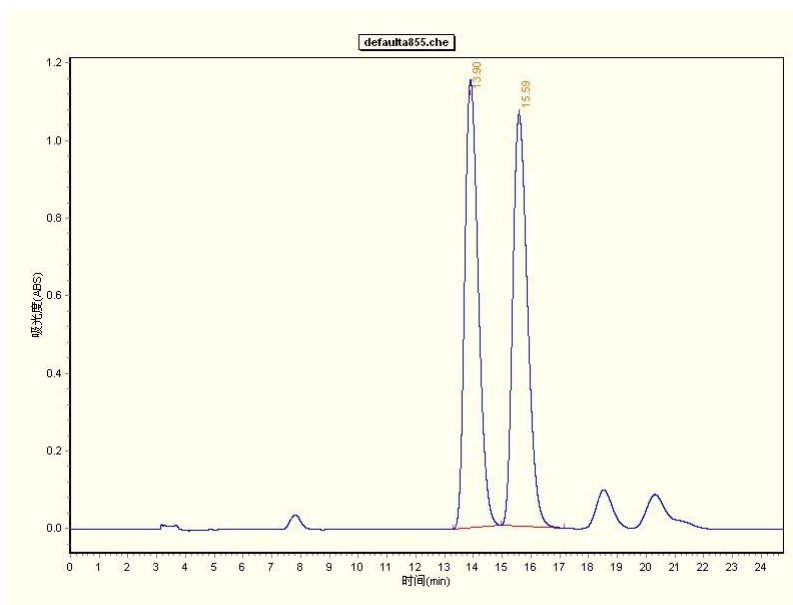

| Entry | Retention time | Area     | Height | Area% | Width | Type |
|-------|----------------|----------|--------|-------|-------|------|
| 1     | 13.90          | 18833788 | 576842 | 50.02 | 1.645 | BB   |
| 2     | 15.59          | 18819072 | 530926 | 49.98 | 2.161 | BB   |

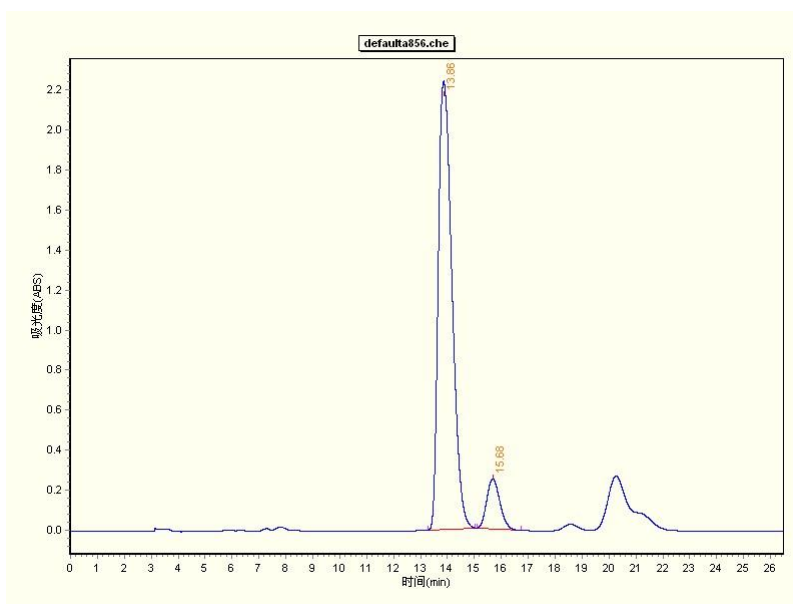

| Entry | Retention time | Area     | Height  | Area% | Width | Type |
|-------|----------------|----------|---------|-------|-------|------|
| 1     | 13.86          | 39522839 | 1118975 | 90.26 | 1.733 | BB   |
| 2     | 15.68          | 4265388  | 125511  | 9.74  | 1.653 | BB   |

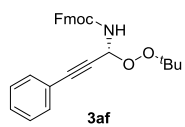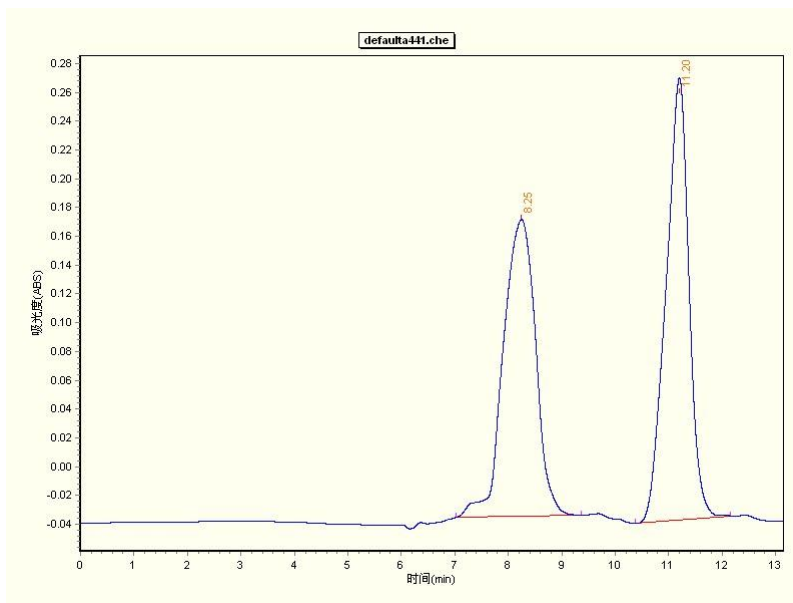

| Entry | Retention time | Area    | Height | Area% | Width | Type |
|-------|----------------|---------|--------|-------|-------|------|
| 1     | 8.25           | 4330919 | 103042 | 48.66 | 2.343 | BB   |
| 2     | 11.20          | 4568608 | 153514 | 51.34 | 1.789 | BB   |

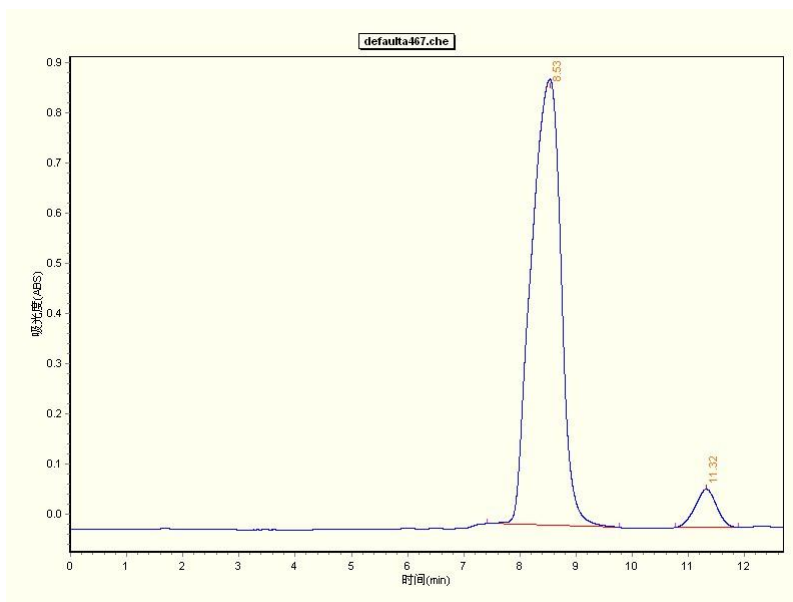

| Entry | Retention time | Area     | Height | Area% | Width | Type |
|-------|----------------|----------|--------|-------|-------|------|
| 1     | 8.53           | 16323432 | 445050 | 94.14 | 2.351 | BB   |
| 2     | 11.32          | 1015871  | 38256  | 5.86  | 1.119 | BB   |



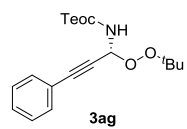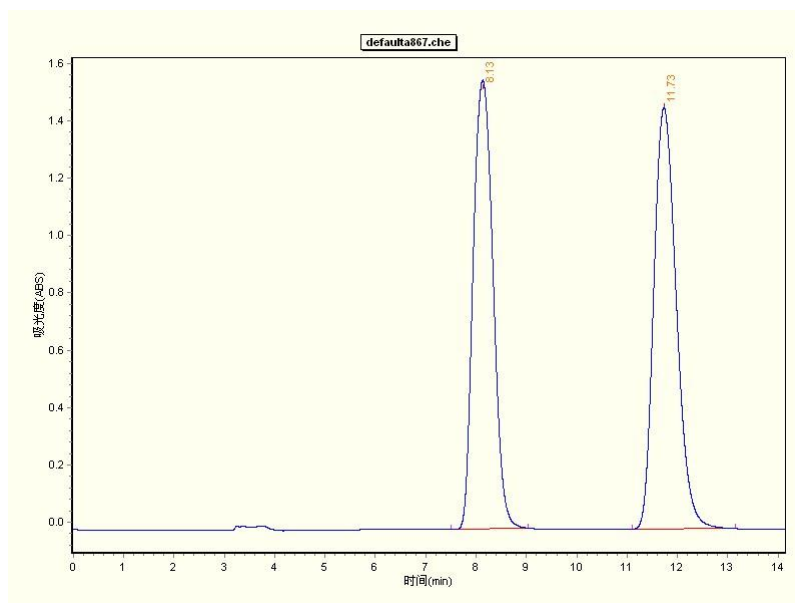

| Entry | Retention time | Area     | Height | Area% | Width | Type |
|-------|----------------|----------|--------|-------|-------|------|
| 1     | 8.13           | 21372095 | 782509 | 48.37 | 1.530 | BB   |
| 2     | 11.73          | 22808799 | 734661 | 51.63 | 2.049 | BB   |

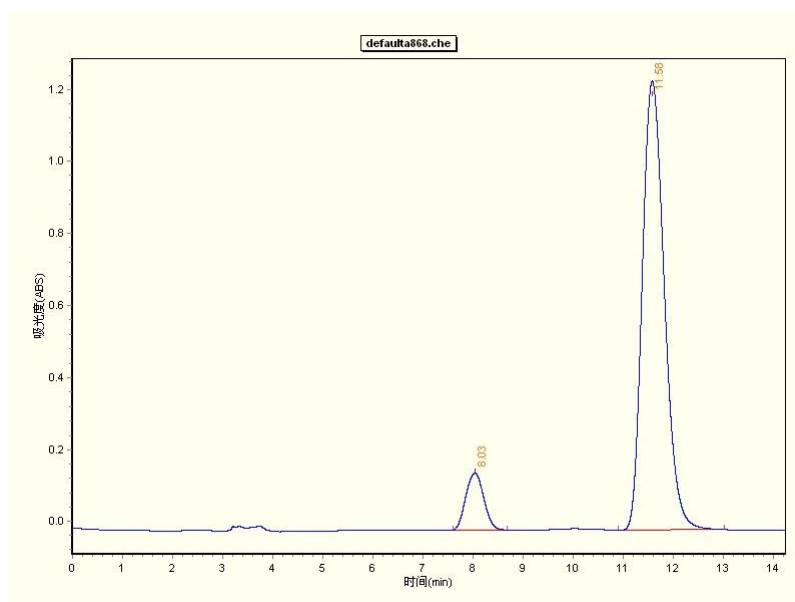

| Entry | Retention time | Area     | Height | Area% | Width | Type |
|-------|----------------|----------|--------|-------|-------|------|
| 1     | 8.03           | 1970686  | 78807  | 9.41  | 1.072 | BB   |
| 2     | 11.58          | 18968257 | 623045 | 90.59 | 2.117 | BB   |

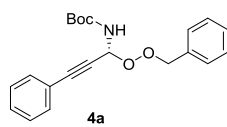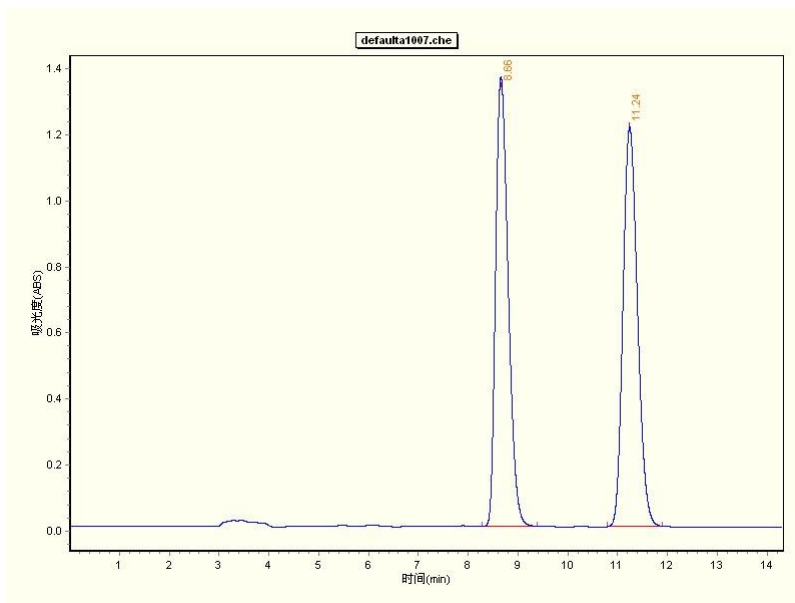

| Entry | Retention time | Area     | Height | Area% | Width | Type |
|-------|----------------|----------|--------|-------|-------|------|
| 1     | 8.66           | 11898085 | 680367 | 49.34 | 1.121 | BB   |
| 2     | 11.24          | 12215920 | 604577 | 50.66 | 1.107 | BB   |

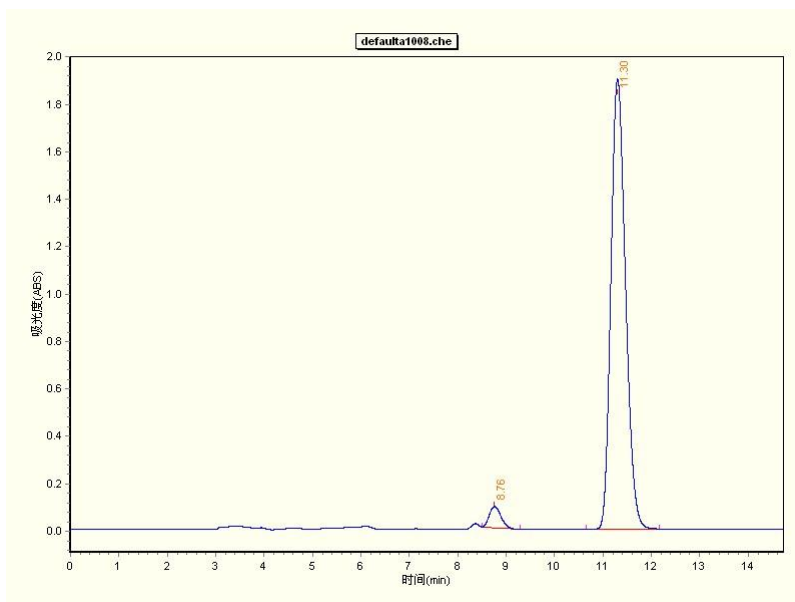

| Entry | Retention time | Area     | Height | Area% | Width | Type |
|-------|----------------|----------|--------|-------|-------|------|
| 1     | 8.76           | 735583   | 44812  | 3.56  | 0.788 | BB   |
| 2     | 11.30          | 19911820 | 949117 | 96.44 | 1.507 | BB   |

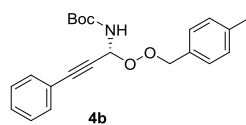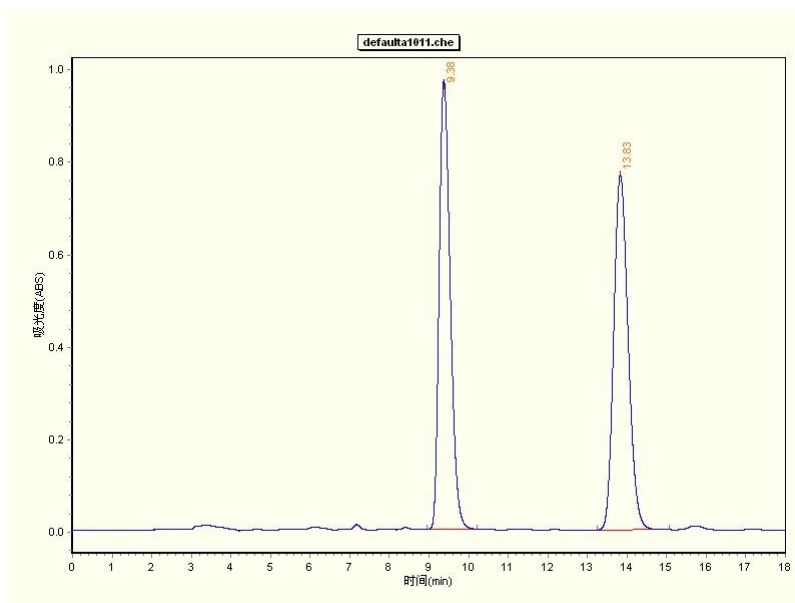

| Entry | Retention time | Area    | Height | Area% | Width | Type |
|-------|----------------|---------|--------|-------|-------|------|
| 1     | 9.38           | 9399997 | 485525 | 49.18 | 1.285 | BB   |
| 2     | 13.83          | 9712728 | 383838 | 50.82 | 1.820 | BB   |

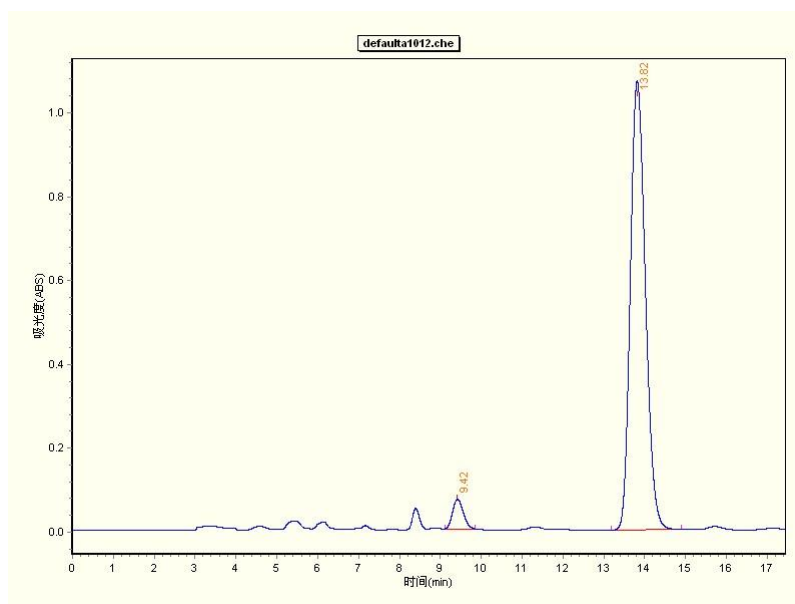

| Entry | Retention time | Area     | Height | Area% | Width | Type |
|-------|----------------|----------|--------|-------|-------|------|
| 1     | 9.42           | 643229   | 35338  | 4.49  | 0.726 | BB   |
| 2     | 13.82          | 13678397 | 535990 | 95.51 | 1.712 | BB   |

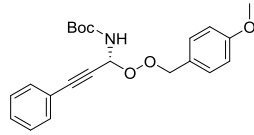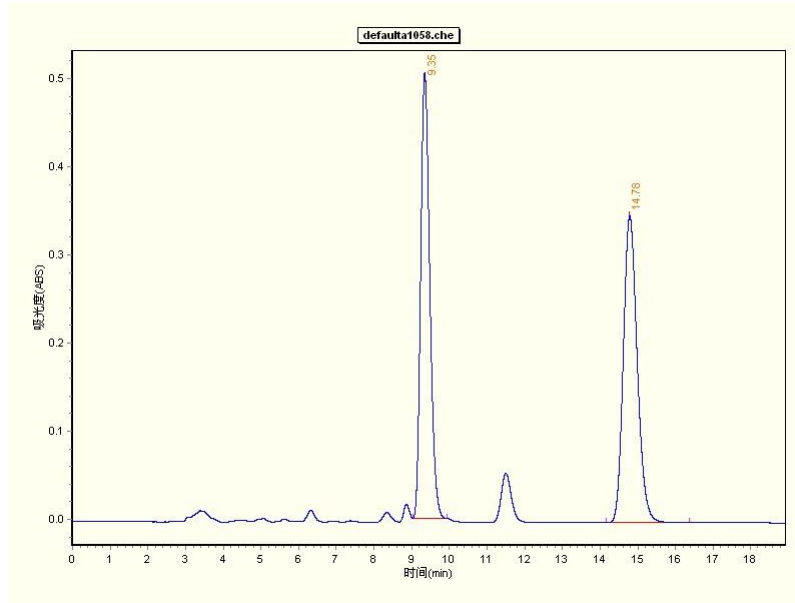

| Entry | Retention time | Area    | Height | Area% | Width | Type |
|-------|----------------|---------|--------|-------|-------|------|
| 1     | 9.35           | 4236453 | 252562 | 48.77 | 0.913 | BB   |
| 2     | 14.78          | 4449512 | 174089 | 51.23 | 2.205 | BB   |

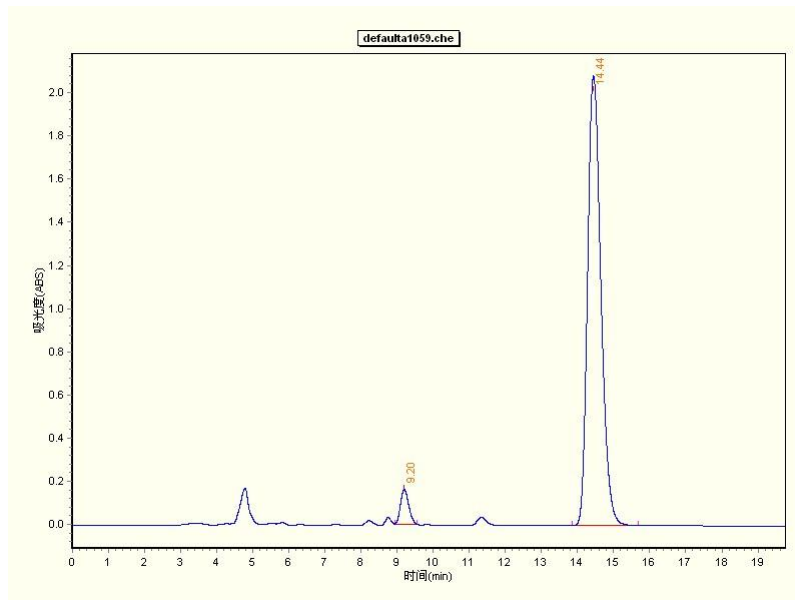

| Entry | Retention time | Area     | Height  | Area% | Width | Type |
|-------|----------------|----------|---------|-------|-------|------|
| 1     | 9.20           | 1259912  | 79725   | 4.51  | 0.630 | BB   |
| 2     | 14.44          | 26694009 | 1039811 | 95.49 | 1.828 | BB   |

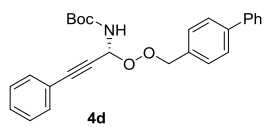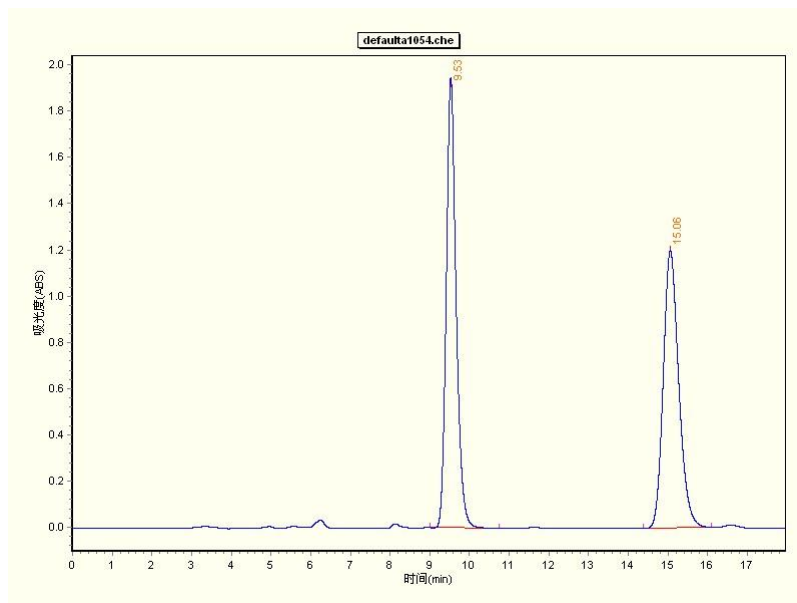

| Entry | Retention time | Area     | Height | Area% | Width | Type |
|-------|----------------|----------|--------|-------|-------|------|
| 1     | 9.53           | 16776959 | 972474 | 50.88 | 1.730 | BB   |
| 2     | 15.06          | 16199593 | 599814 | 49.12 | 1.730 | BB   |

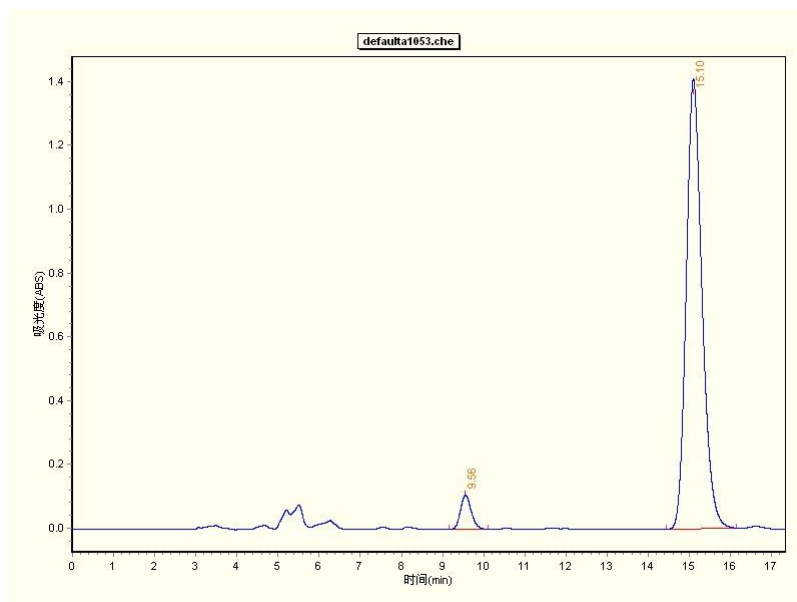

| Entry | Retention time | Area     | Height | Area% | Width | Type |
|-------|----------------|----------|--------|-------|-------|------|
| 1     | 9.56           | 969084   | 53170  | 4.91  | 0.945 | BB   |
| 2     | 15.10          | 18777371 | 705091 | 95.09 | 1.718 | BB   |

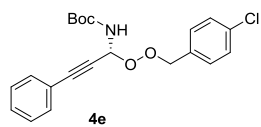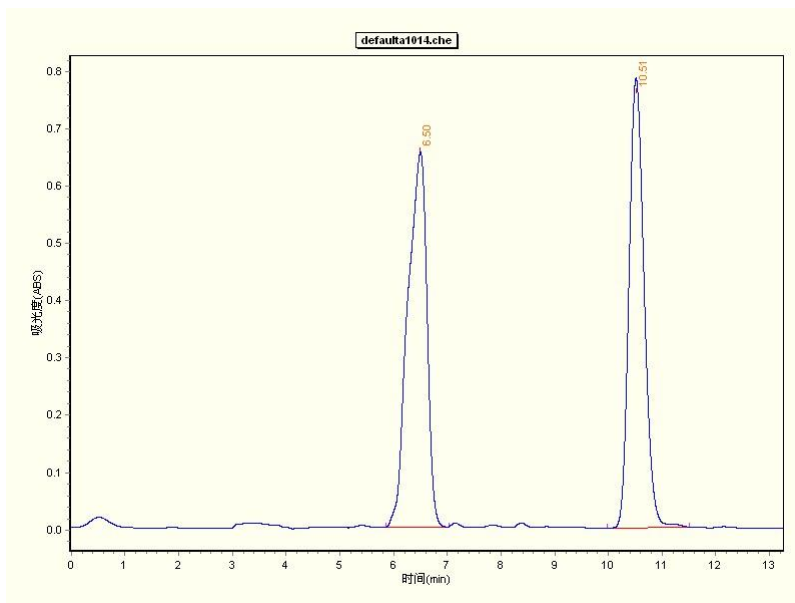

| Entry | Retention time | Area    | Height | Area% | Width | Type |
|-------|----------------|---------|--------|-------|-------|------|
| 1     | 6.50           | 8083302 | 326850 | 51.31 | 1.158 | BB   |
| 2     | 10.51          | 7671308 | 392171 | 48.69 | 1.526 | BB   |

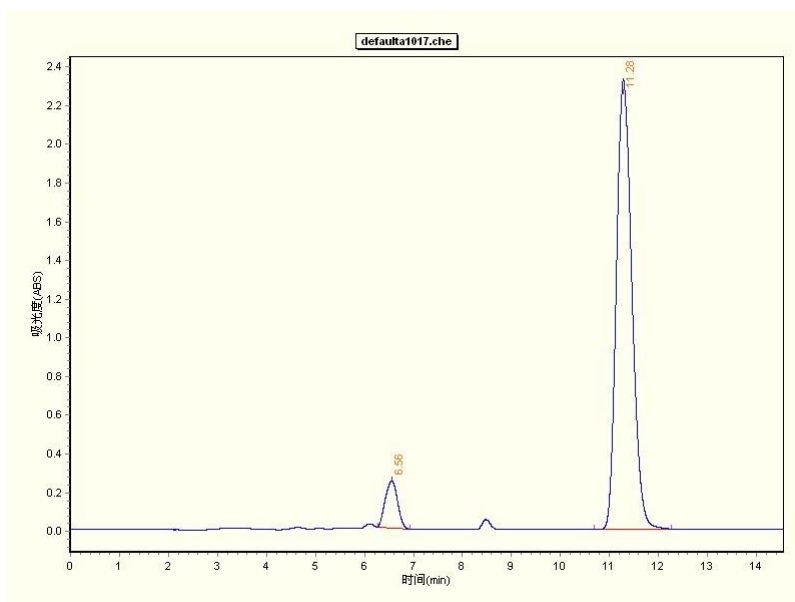

| Entry | Retention time | Area     | Height  | Area% | Width | Type |
|-------|----------------|----------|---------|-------|-------|------|
| 1     | 6.56           | 2118393  | 121535  | 7.67  | 0.657 | BB   |
| 2     | 11.28          | 25483805 | 1163536 | 92.33 | 1.558 | BB   |

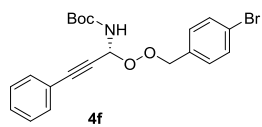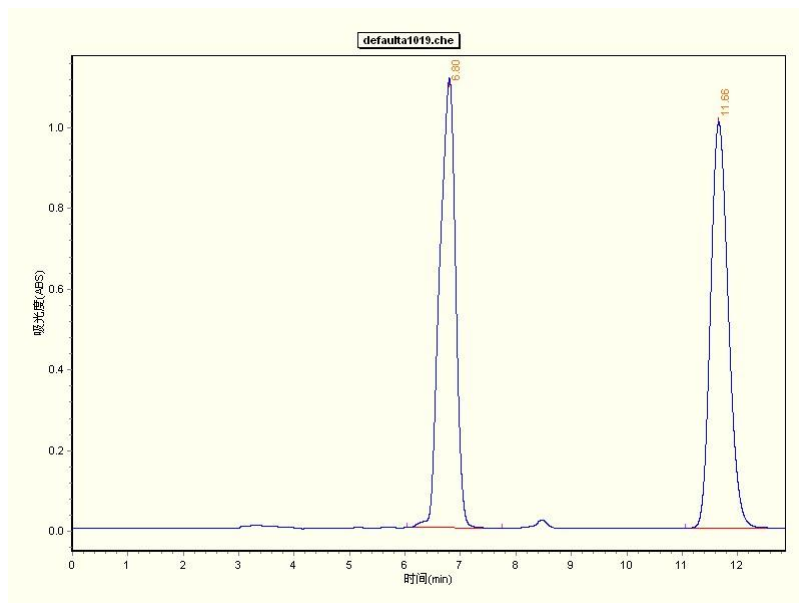

| Entry | Retention time | Area     | Height | Area% | Width | Type |
|-------|----------------|----------|--------|-------|-------|------|
| 1     | 6.80           | 11038914 | 556794 | 49.74 | 1.708 | BB   |
| 2     | 11.66          | 11156367 | 502777 | 50.26 | 1.928 | BB   |

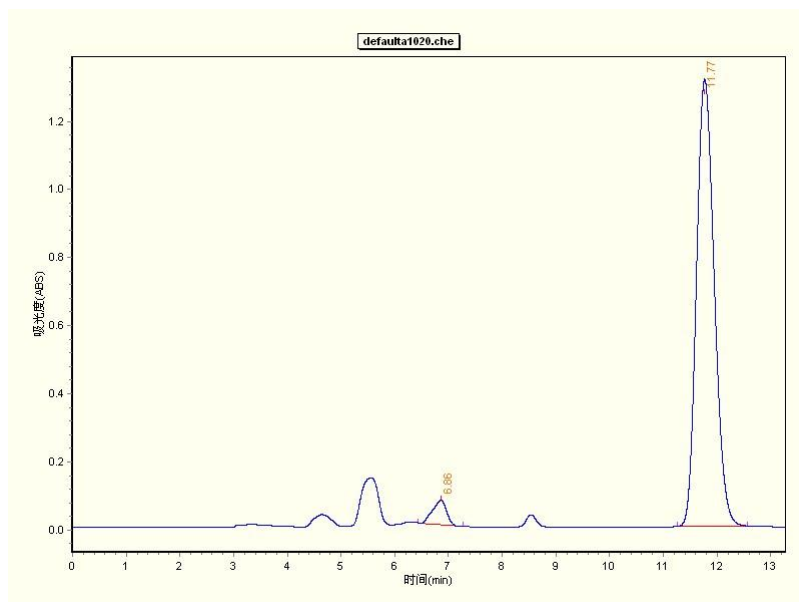

| Entry | Retention time | Area     | Height | Area% | Width | Type |
|-------|----------------|----------|--------|-------|-------|------|
| 1     | 6.86           | 626578   | 35400  | 3.99  | 0.821 | BB   |
| 2     | 11.77          | 15079913 | 656860 | 96.01 | 1.311 | BB   |

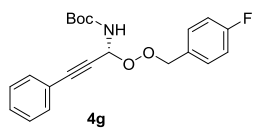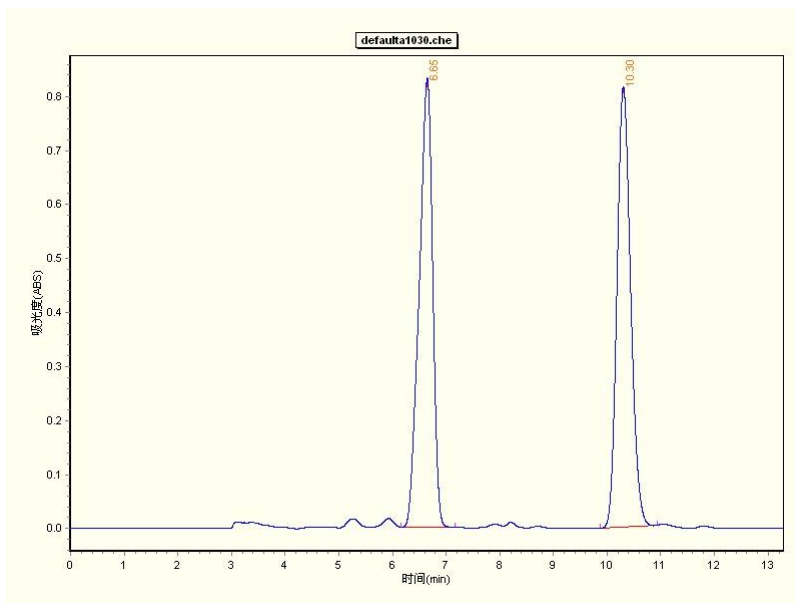

| Entry | Retention time | Area    | Height | Area% | Width | Type |
|-------|----------------|---------|--------|-------|-------|------|
| 1     | 6.65           | 7251364 | 415780 | 50.21 | 0.996 | BB   |
| 2     | 10.30          | 7191191 | 407562 | 49.79 | 1.059 | BB   |

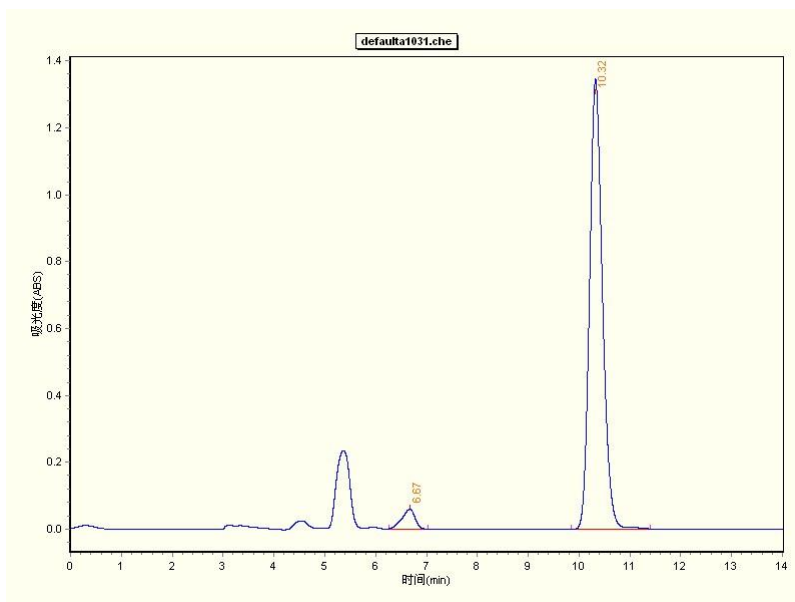

| Entry | Retention time | Area     | Height | Area% | Width | Type |
|-------|----------------|----------|--------|-------|-------|------|
| 1     | 6.67           | 522899   | 29441  | 4.25  | 0.767 | BB   |
| 2     | 10.32          | 11788292 | 672375 | 95.75 | 1.550 | BB   |



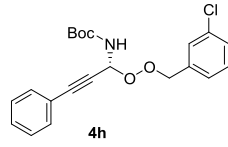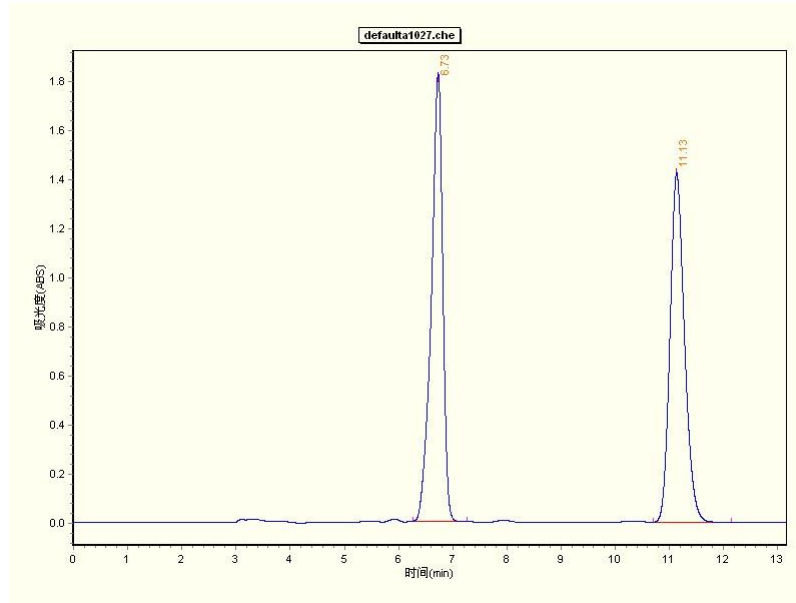

| Entry | Retention time | Area     | Height | Area% | Width | Type |
|-------|----------------|----------|--------|-------|-------|------|
| 1     | 6.73           | 13427126 | 914641 | 50.34 | 0.991 | BB   |
| 2     | 11.13          | 13245445 | 712370 | 49.66 | 1.434 | BB   |

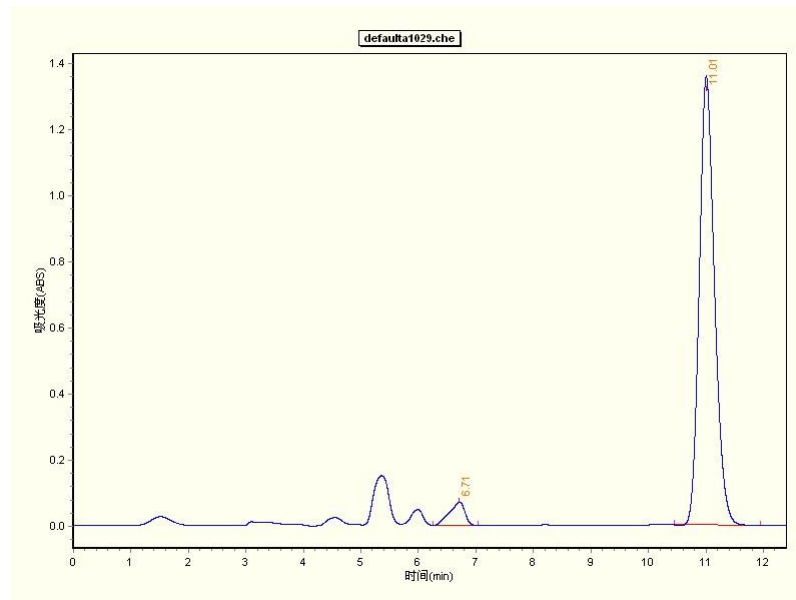

| Entry | Retention time | Area     | Height | Area% | Width | Type |
|-------|----------------|----------|--------|-------|-------|------|
| 1     | 6.71           | 646683   | 34991  | 4.92  | 0.796 | BB   |
| 2     | 11.01          | 12499744 | 679180 | 95.08 | 1.504 | BB   |

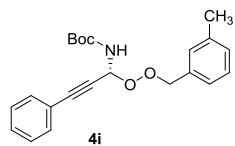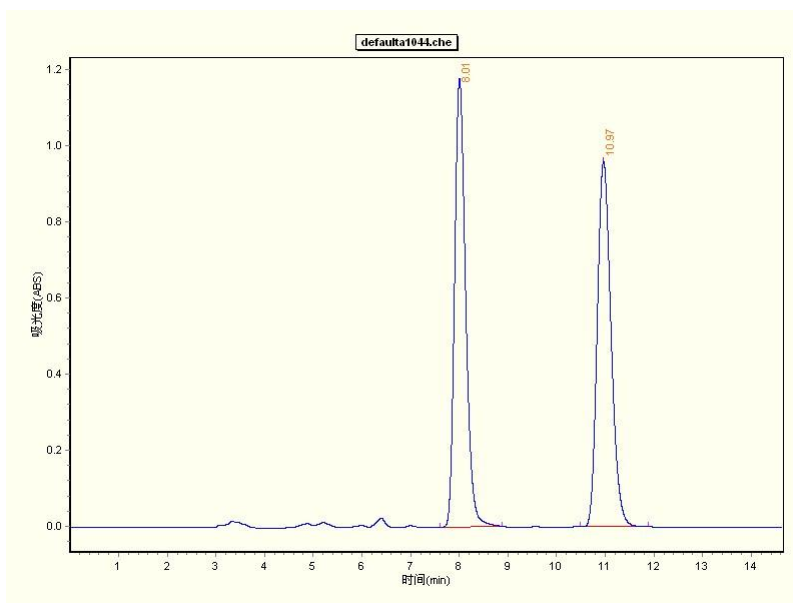

| Entry | Retention time | Area    | Height | Area% | Width | Type |
|-------|----------------|---------|--------|-------|-------|------|
| 1     | 8.01           | 9254821 | 588662 | 49.63 | 1.278 | BB   |
| 2     | 10.97          | 9391481 | 479441 | 50.37 | 1.379 | BB   |

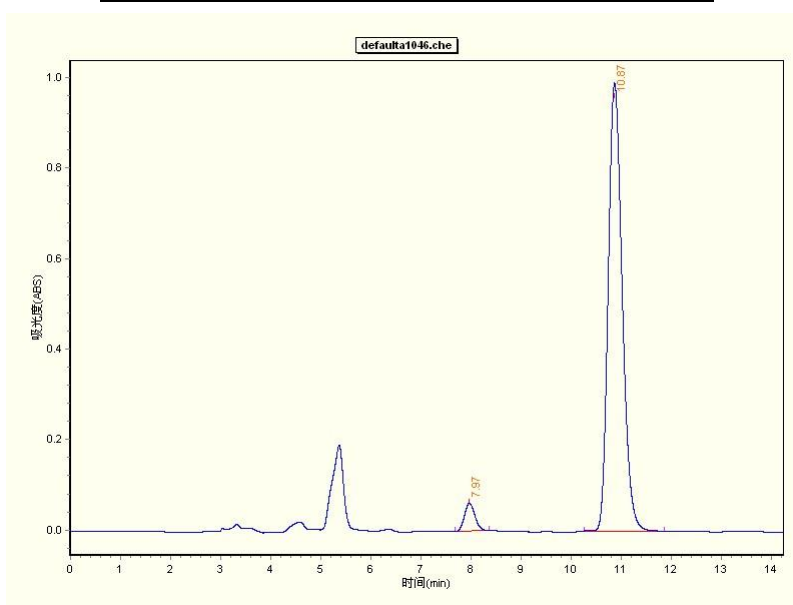

| Entry | Retention time | Area    | Height | Area% | Width | Type |
|-------|----------------|---------|--------|-------|-------|------|
| 1     | 7.97           | 437254  | 30754  | 4.35  | 0.692 | BB   |
| 2     | 10.87          | 9605712 | 495286 | 95.65 | 1.596 | BB   |

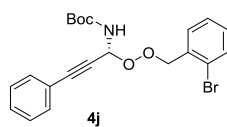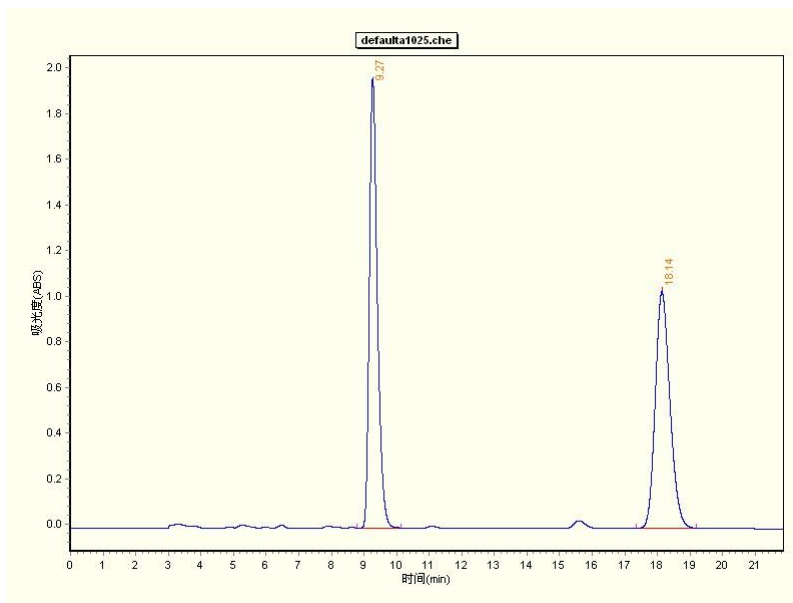

| Entry | Retention time | Area     | Height | Area% | Width | Type |
|-------|----------------|----------|--------|-------|-------|------|
| 1     | 9.27           | 16781861 | 984898 | 50.94 | 1.343 | BB   |
| 2     | 18.14          | 16165514 | 517834 | 49.06 | 1.863 | BB   |

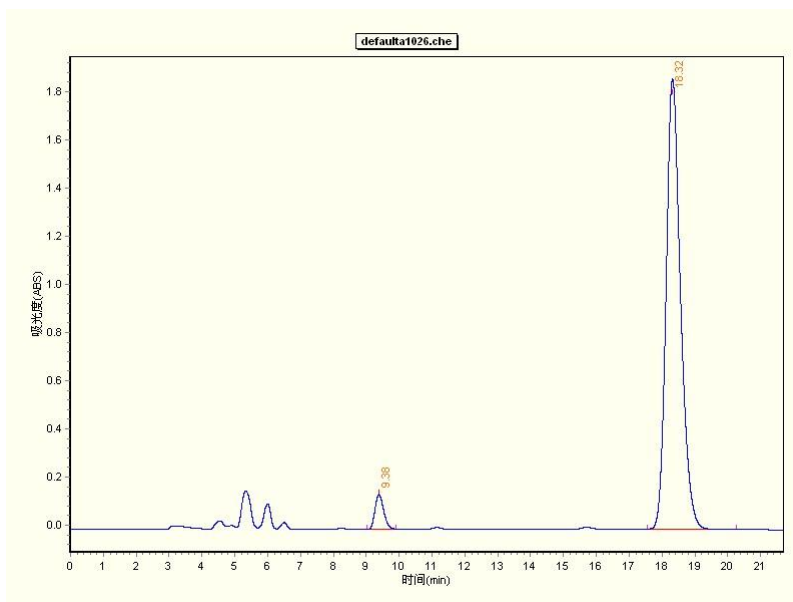

| Entry | Retention time | Area     | Height | Area% | Width | Type |
|-------|----------------|----------|--------|-------|-------|------|
| 1     | 9.38           | 1331692  | 72337  | 4.47  | 0.882 | BB   |
| 2     | 18.32          | 28469021 | 934607 | 95.53 | 2.731 | BB   |

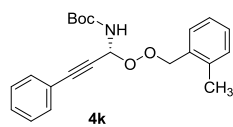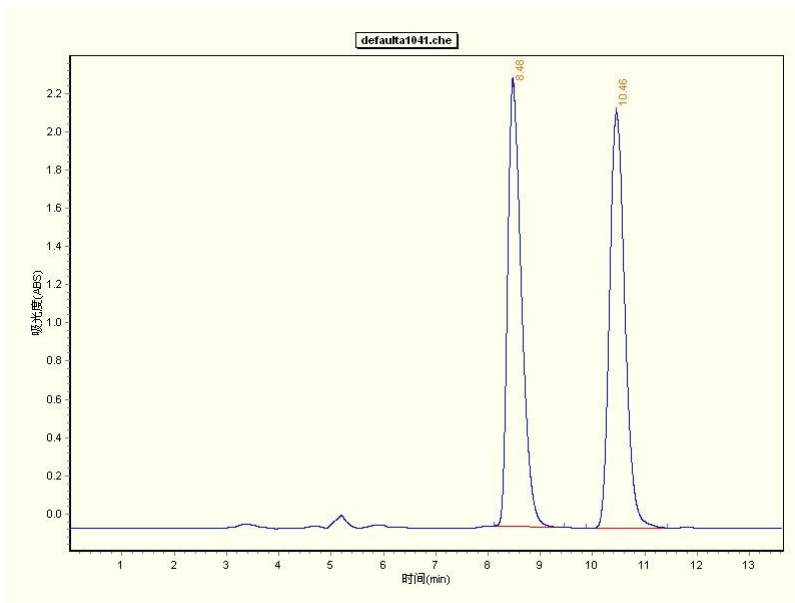

| Entry | Retention time | Area     | Height  | Area% | Width | Type |
|-------|----------------|----------|---------|-------|-------|------|
| 1     | 8.48           | 21380820 | 1171178 | 49.14 | 1.338 | BB   |
| 2     | 10.46          | 22130952 | 1087902 | 50.86 | 1.554 | BB   |

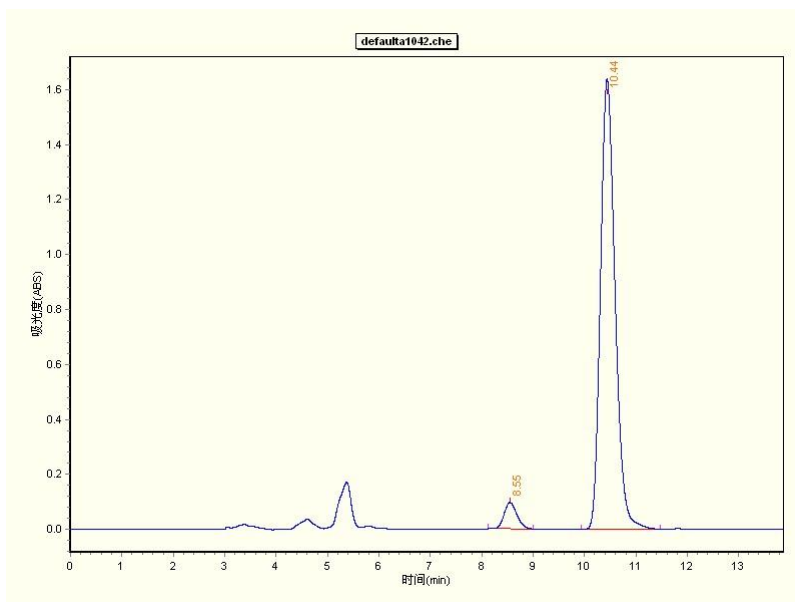

| Entry | Retention time | Area     | Height | Area% | Width | Type |
|-------|----------------|----------|--------|-------|-------|------|
| 1     | 8.55           | 822791   | 47824  | 4.86  | 0.886 | BB   |
| 2     | 10.44          | 16114982 | 818780 | 95.14 | 1.539 | BB   |

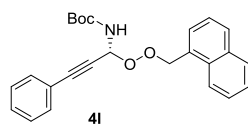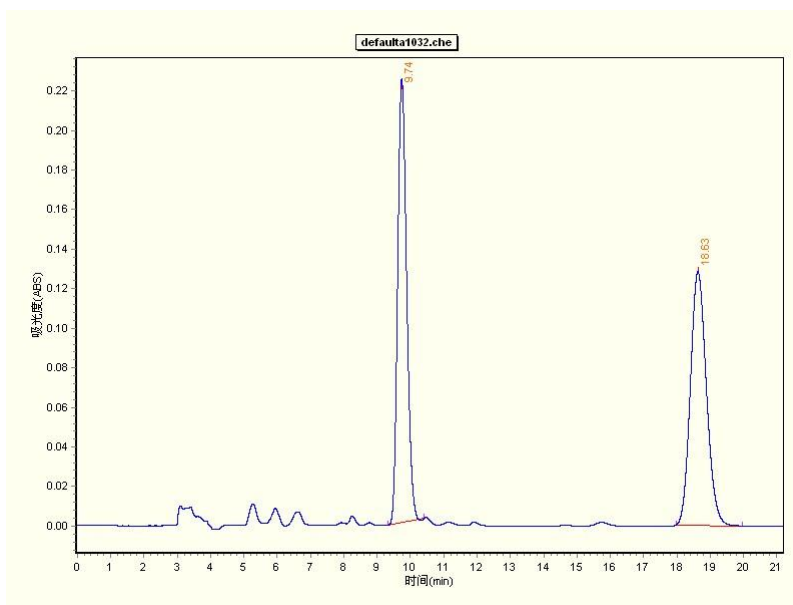

| Entry | Retention time | Area    | Height | Area% | Width | Type |
|-------|----------------|---------|--------|-------|-------|------|
| 1     | 9.74           | 2093911 | 112178 | 49.44 | 1.092 | BB   |
| 2     | 18.63          | 2141654 | 64090  | 50.56 | 2.005 | BB   |

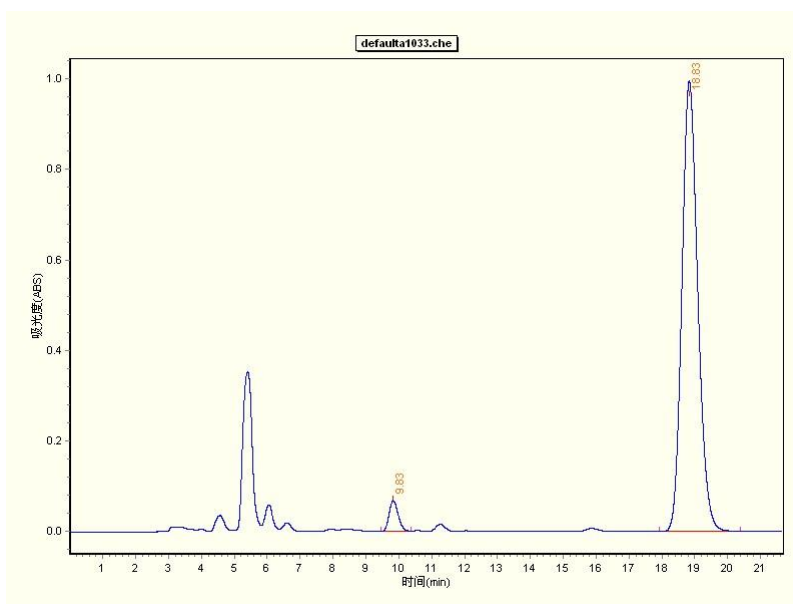

| Entry | Retention time | Area     | Height | Area% | Width | Type |
|-------|----------------|----------|--------|-------|-------|------|
| 1     | 9.83           | 642506   | 33808  | 3.72  | 0.902 | BB   |
| 2     | 18.83          | 16627433 | 497012 | 96.28 | 2.475 | BB   |

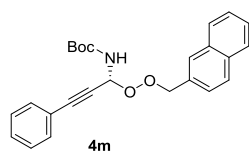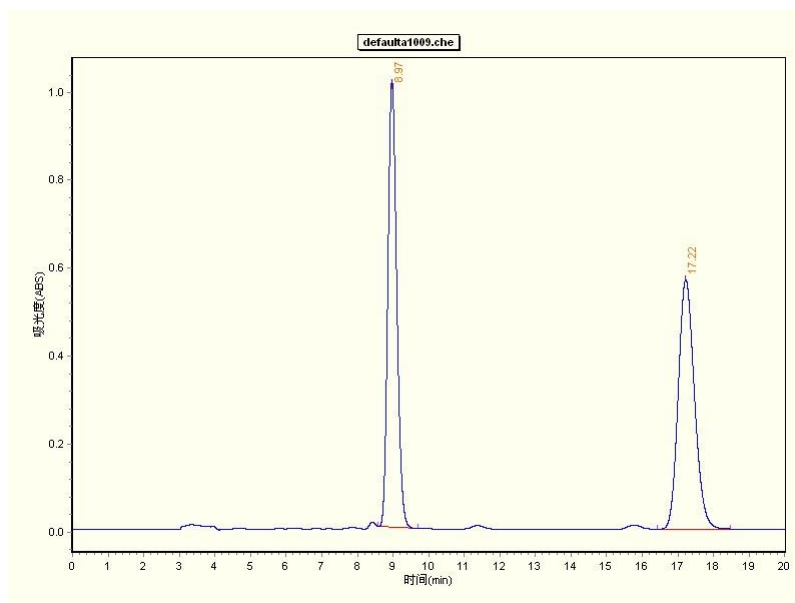

| Entry | Retention time | Area    | Height | Area% | Width | Type |
|-------|----------------|---------|--------|-------|-------|------|
| 1     | 8.97           | 8752327 | 508067 | 49.45 | 1.143 | BB   |
| 2     | 17.22          | 8945685 | 283526 | 50.55 | 2.048 | BB   |

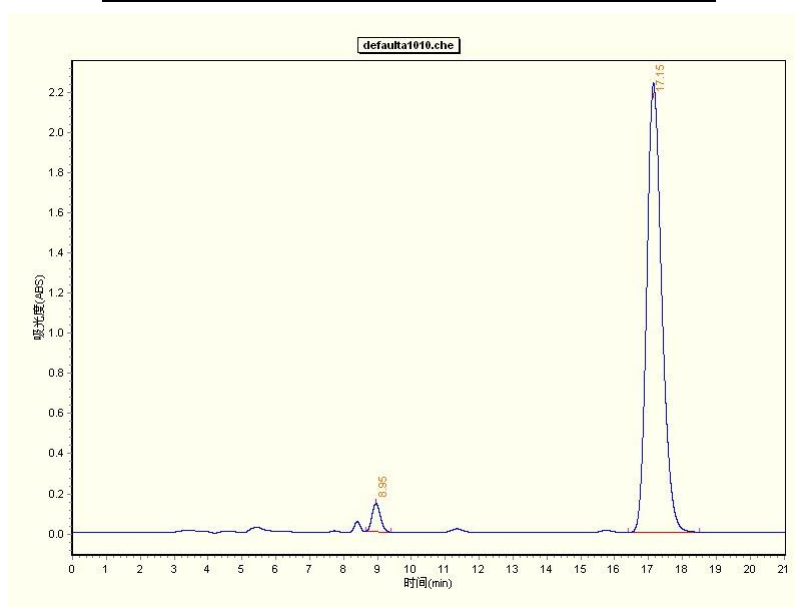

| Entry | Retention time | Area     | Height  | Area% | Width | Type |
|-------|----------------|----------|---------|-------|-------|------|
| 1     | 8.95           | 127068   | 70783   | 3.43  | 0.751 | BB   |
| 2     | 17.15          | 34537575 | 1119426 | 96.57 | 2.077 | BB   |

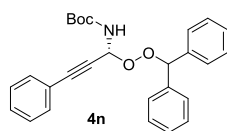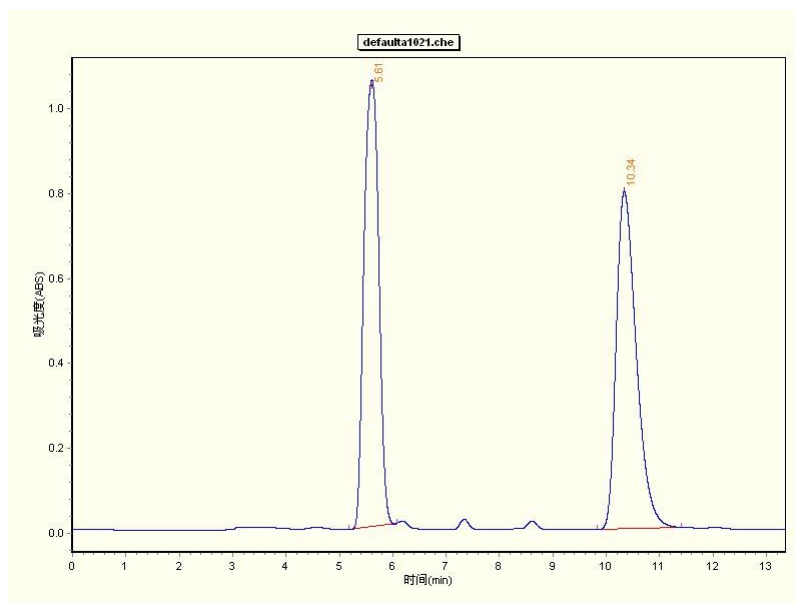

| Entry | Retention time | Area     | Height | Area% | Width | Type |
|-------|----------------|----------|--------|-------|-------|------|
| 1     | 5.61           | 10129388 | 525904 | 49.45 | 0.900 | BB   |
| 2     | 10.34          | 10355933 | 397616 | 50.55 | 1.562 | BB   |

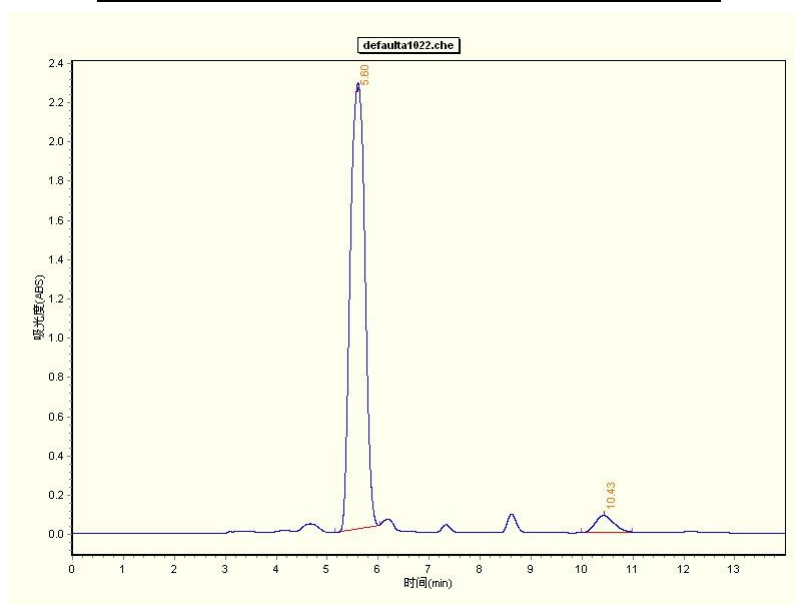

| Entry | Retention time | Area     | Height  | Area% | Width | Type |
|-------|----------------|----------|---------|-------|-------|------|
| 1     | 5.60           | 22564577 | 1135252 | 95.44 | 0.887 | BB   |
| 2     | 10.43          | 1078184  | 42750   | 4.56  | 0.998 | BB   |

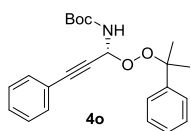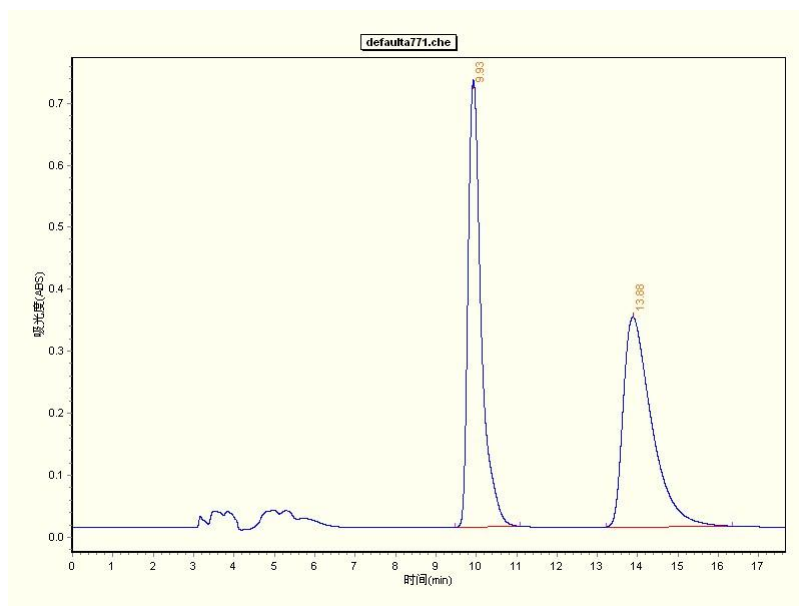

| Entry | Retention time | Area    | Height | Area% | Width | Type |
|-------|----------------|---------|--------|-------|-------|------|
| 1     | 9.93           | 8157730 | 360508 | 49.64 | 1.618 | BB   |
| 2     | 13.88          | 8275513 | 169235 | 50.36 | 3.108 | BB   |

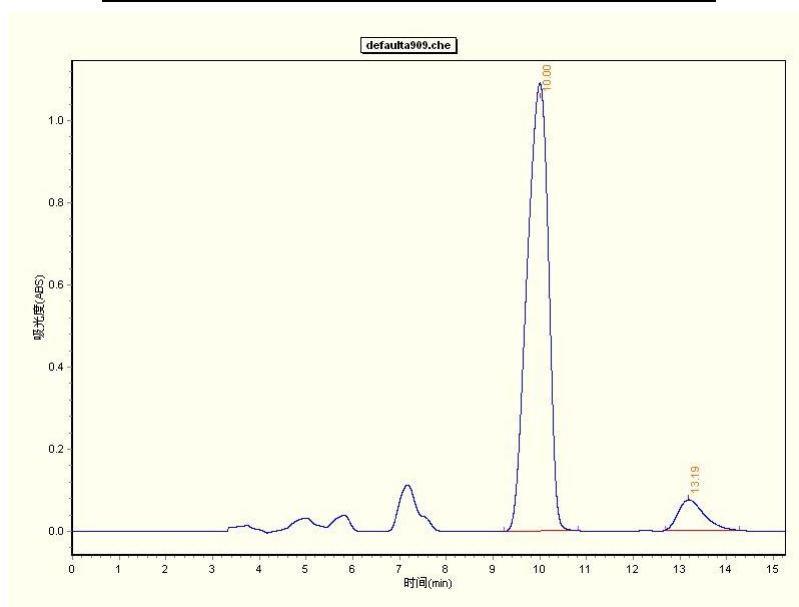

| Entry | Retention time | Area     | Height | Area% | Width | Type |
|-------|----------------|----------|--------|-------|-------|------|
| 1     | 10.00          | 17308990 | 546022 | 92.39 | 1.578 | BB   |
| 2     | 13.19          | 1425097  | 37113  | 7.61  | 1.597 | BB   |



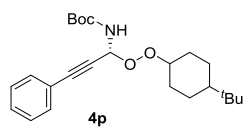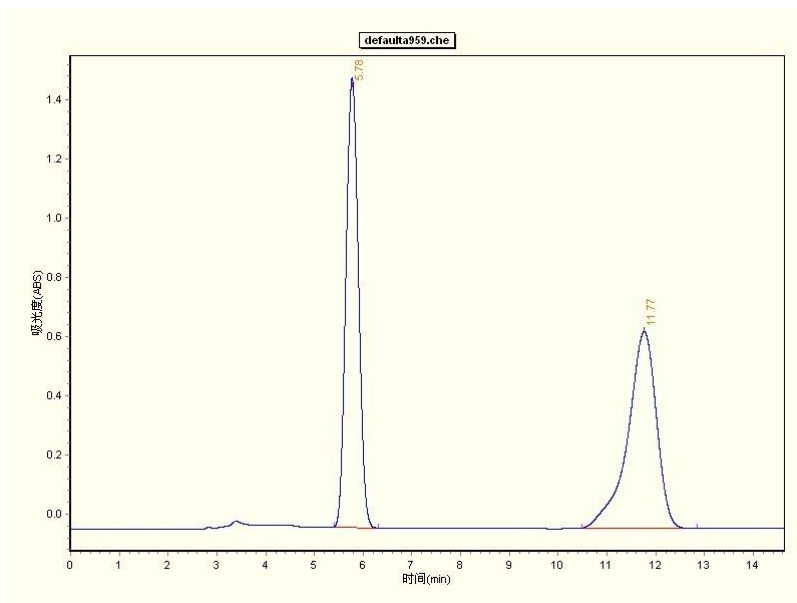

| Entry | Retention time | Area     | Height | Area% | Width | Type |
|-------|----------------|----------|--------|-------|-------|------|
| 1     | 5.78           | 13558828 | 760316 | 49.80 | 0.922 | BB   |
| 2     | 11.77          | 13666577 | 333002 | 50.20 | 2.368 | BB   |

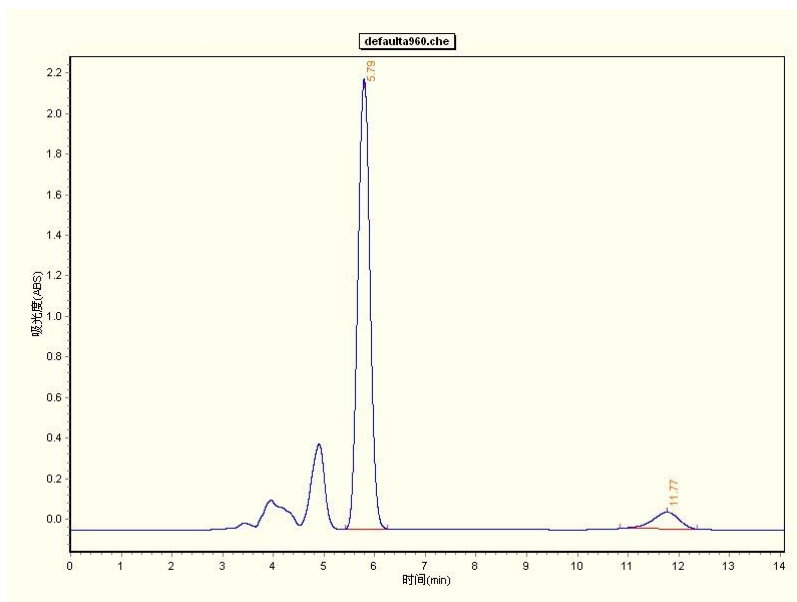

| Entry | Retention time | Area     | Height  | Area% | Width | Type |
|-------|----------------|----------|---------|-------|-------|------|
| 1     | 5.79           | 18393855 | 1107981 | 92.43 | 0.838 | BB   |
| 2     | 11.77          | 1505405  | 41011   | 7.57  | 1.524 | BB   |

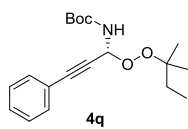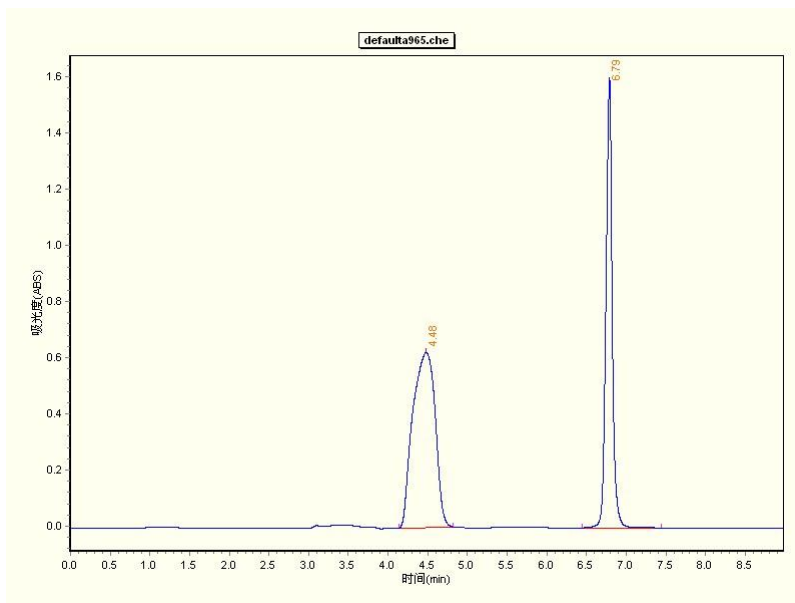

| Entry | Retention time | Area    | Height | Area% | Width | Type |
|-------|----------------|---------|--------|-------|-------|------|
| 1     | 4.48           | 6126489 | 311121 | 58.38 | 0.683 | BB   |
| 2     | 6.79           | 4366814 | 799779 | 41.62 | 1.003 | BB   |

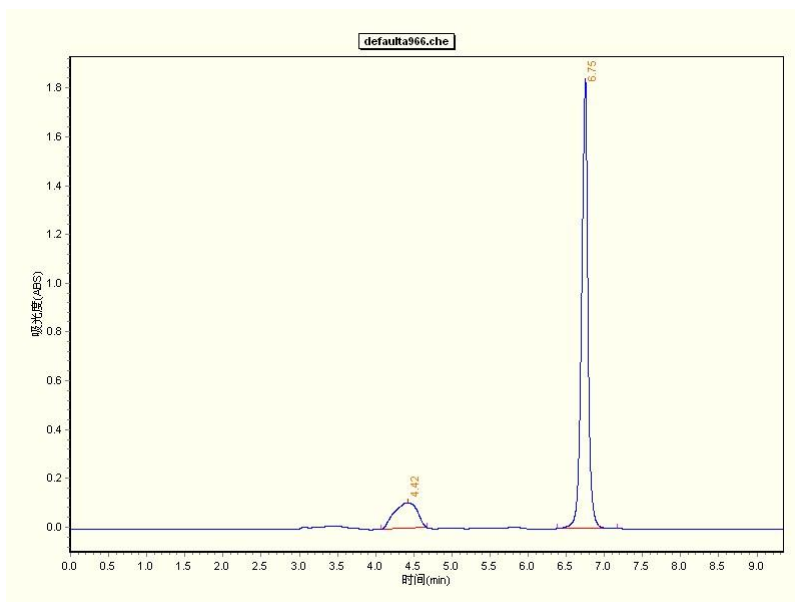

| Entry | Retention time | Area    | Height | Area% | Width | Type |
|-------|----------------|---------|--------|-------|-------|------|
| 1     | 4.42           | 1095112 | 53629  | 16.94 | 0.603 | BB   |
| 2     | 6.75           | 5369605 | 921016 | 83.06 | 0.787 | BB   |

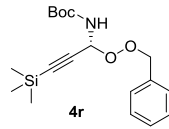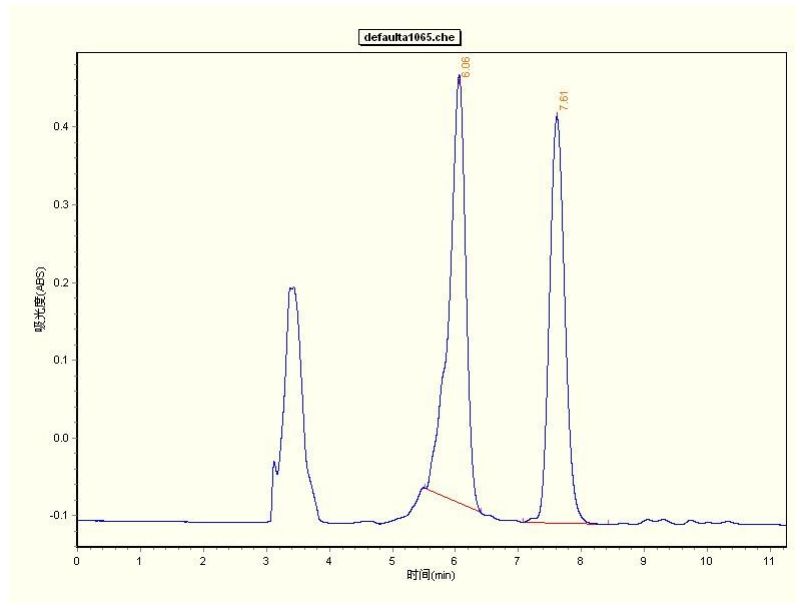

| Entry | Retention time | Area    | Height | Area% | Width | Type |
|-------|----------------|---------|--------|-------|-------|------|
| 1     | 6.06           | 5103117 | 275568 | 53.45 | 0.892 | BB   |
| 2     | 7.61           | 4444661 | 261556 | 46.55 | 1.354 | BB   |

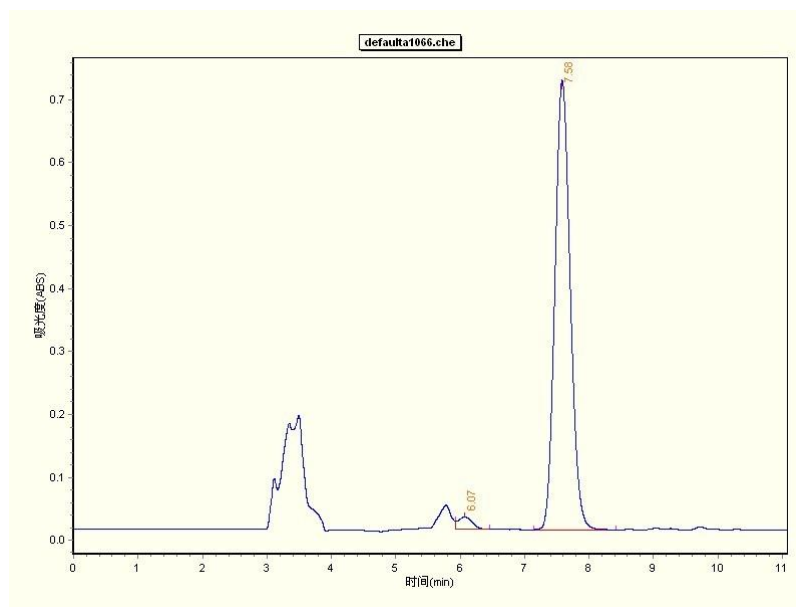

| Entry | Retention time | Area    | Height | Area% | Width | Type |
|-------|----------------|---------|--------|-------|-------|------|
| 1     | 6.07           | 432105  | 18677  | 6.83  | 0.553 | BB   |
| 2     | 7.58           | 5892391 | 356865 | 93.17 | 1.278 | BB   |

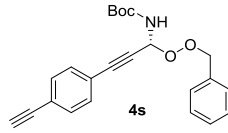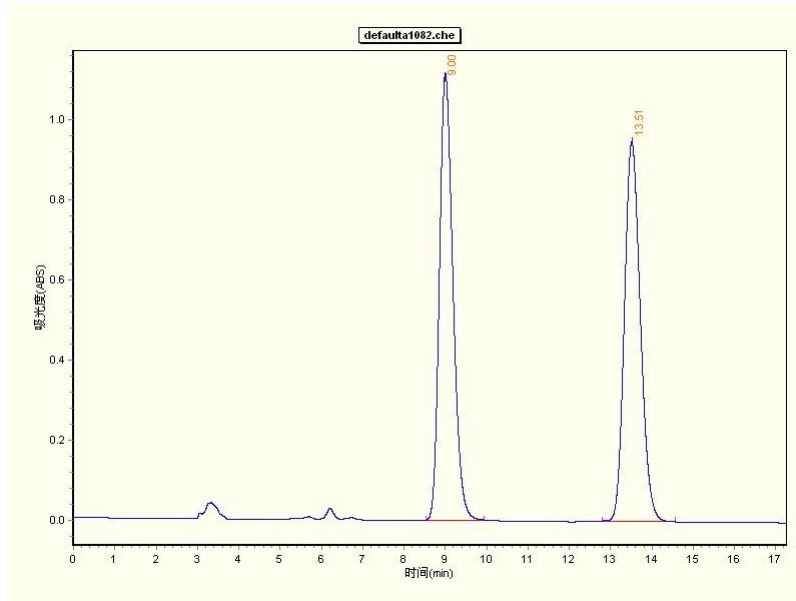

| Entry | Retention time | Area     | Height | Area% | Width | Type |
|-------|----------------|----------|--------|-------|-------|------|
| 1     | 9.00           | 12640017 | 557604 | 49.92 | 1.407 | BB   |
| 2     | 13.51          | 12682036 | 473436 | 50.08 | 1.762 | BB   |

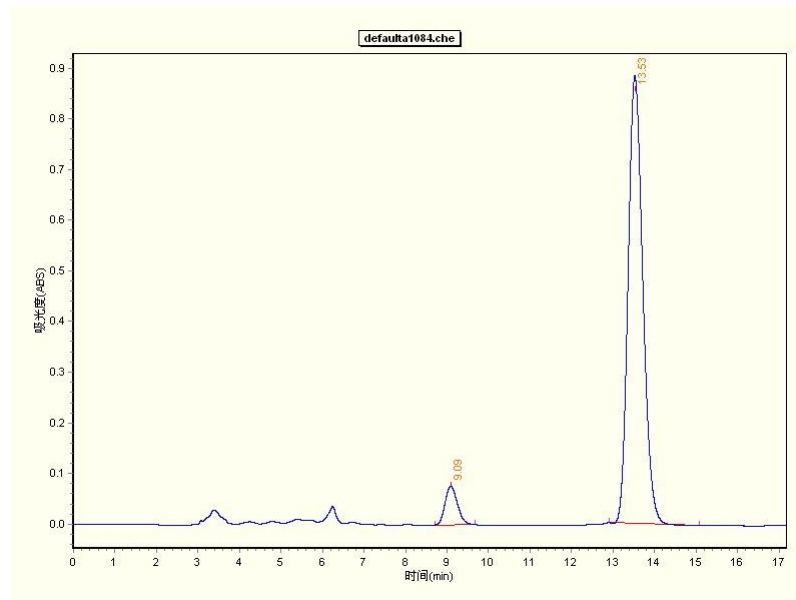

| Entry | Retention time | Area     | Height | Area% | Width | Type |
|-------|----------------|----------|--------|-------|-------|------|
| 1     | 9.09           | 787165   | 38220  | 6.76  | 0.970 | BB   |
| 2     | 13.53          | 10857826 | 441855 | 93.24 | 2.173 | BB   |

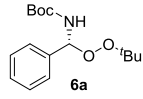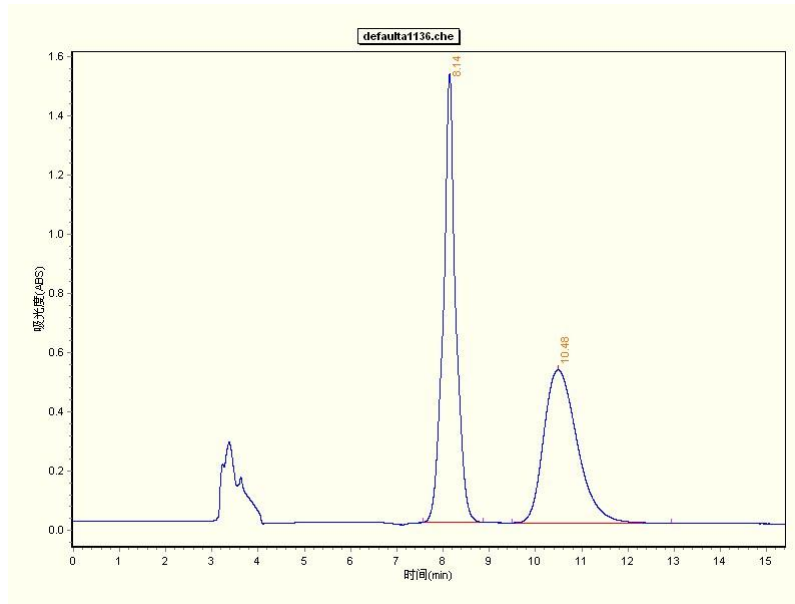

| Entry | Retention time | Area     | Height | Area% | Width | Type |
|-------|----------------|----------|--------|-------|-------|------|
| 1     | 8.14           | 14159486 | 775720 | 52.25 | 1.307 | BB   |
| 2     | 10.48          | 12939361 | 258307 | 47.75 | 3.441 | BB   |

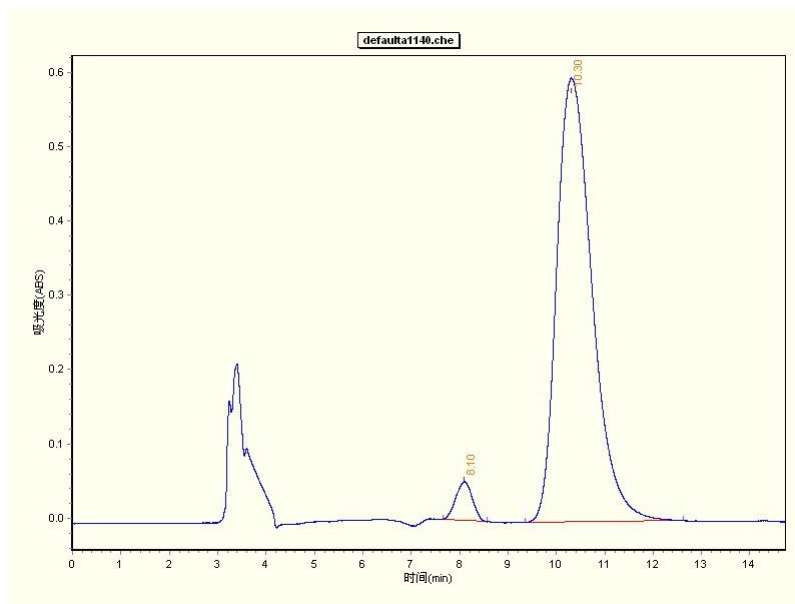

| Entry | Retention time | Area     | Height | Area% | Width | Type |
|-------|----------------|----------|--------|-------|-------|------|
| 1     | 8.10           | 627677   | 26254  | 3.97  | 0.907 | BB   |
| 2     | 10.30          | 15180824 | 298971 | 96.03 | 3.278 | BB   |

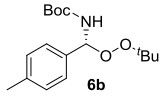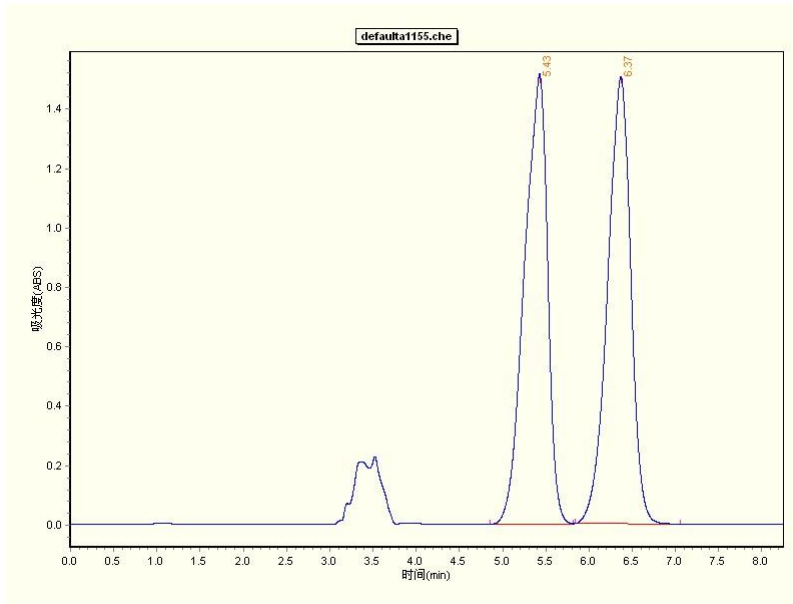

| Entry | Retention time | Area     | Height | Area% | Width | Type |
|-------|----------------|----------|--------|-------|-------|------|
| 1     | 5.43           | 14087316 | 756610 | 50.08 | 0.963 | BB   |
| 2     | 6.37           | 14041212 | 752312 | 49.98 | 1.213 | BB   |

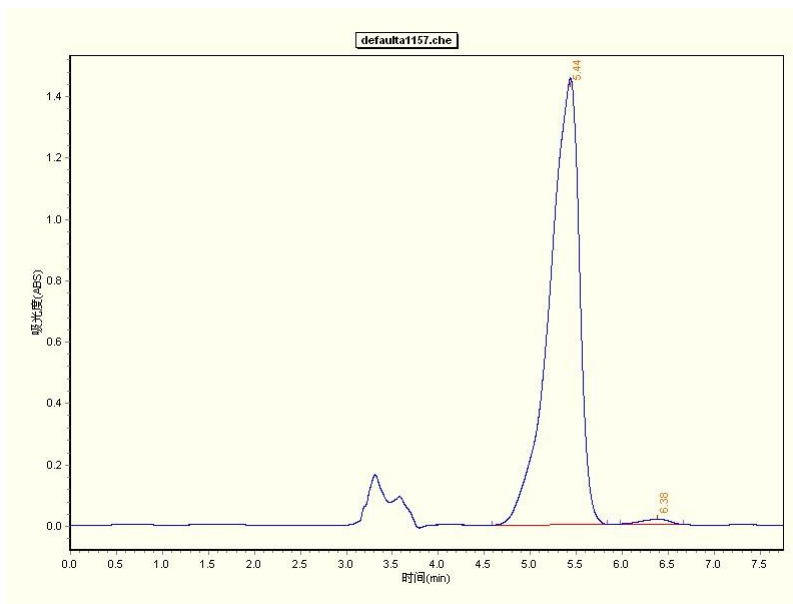

| Entry | Retention time | Area     | Height | Area% | Width | Type |
|-------|----------------|----------|--------|-------|-------|------|
| 1     | 5.44           | 16554007 | 727840 | 98.95 | 1.254 | BB   |
| 2     | 6.38           | 176318   | 8394   | 1.05  | 0.692 | BB   |

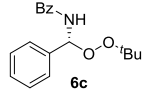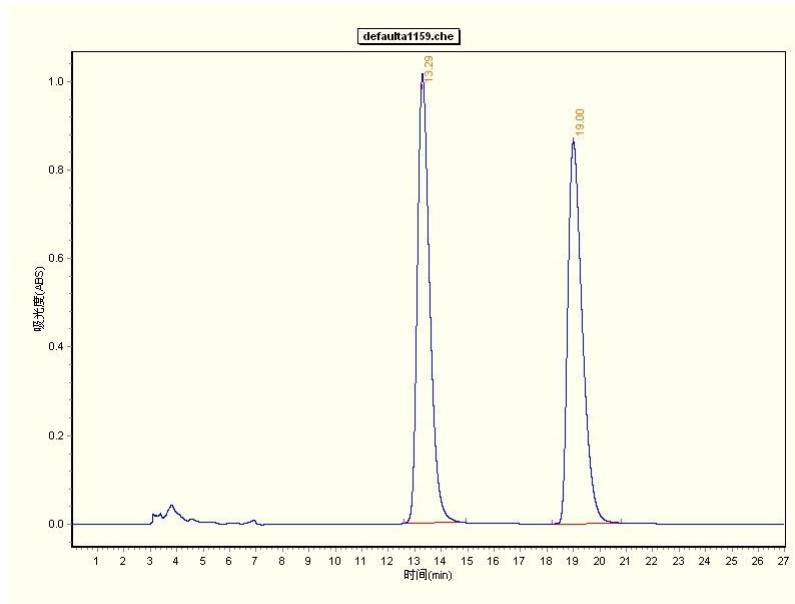

| Entry | Retention time | Area     | Height | Area% | Width | Type |
|-------|----------------|----------|--------|-------|-------|------|
| 1     | 13.29          | 16452627 | 507804 | 50.08 | 2.333 | BB   |
| 2     | 19.00          | 16398860 | 432046 | 49.92 | 2.610 | BB   |

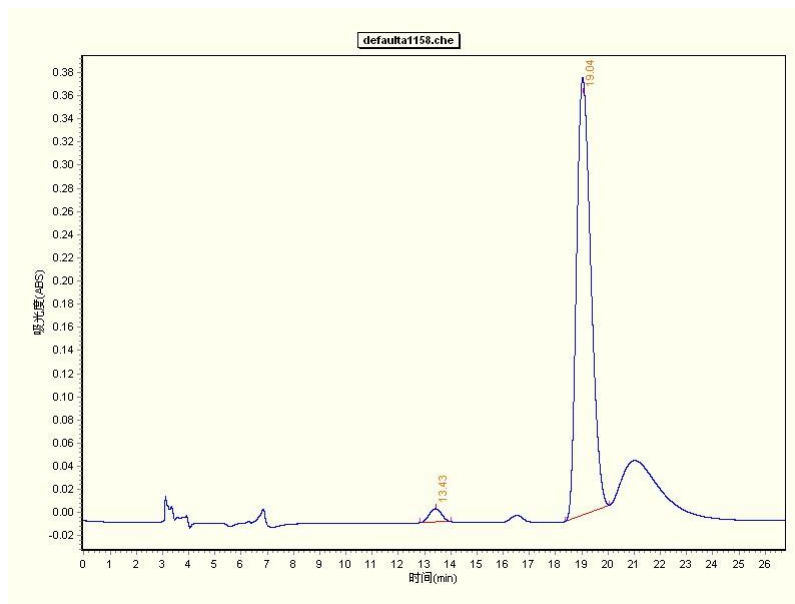

| Entry | Retention time | Area    | Height  | Area% | Width | Type |
|-------|----------------|---------|---------|-------|-------|------|
| 1     | 13.43          | 194658  | 5847    | 2.64  | 1.208 | BB   |
| 2     | 19.04          | 7189295 | 1888699 | 97.36 | 1.692 | BB   |

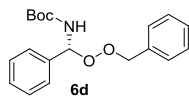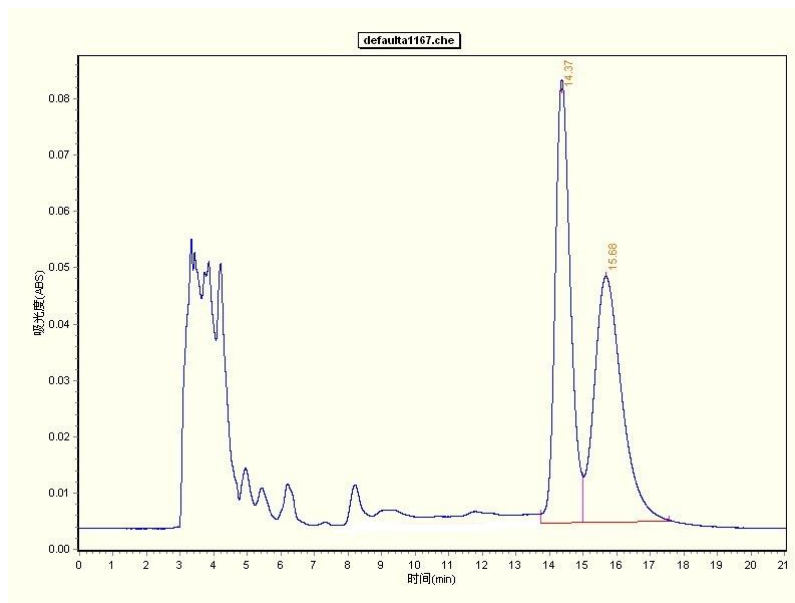

| Entry | Retention time | Area    | Height | Area% | Width | Type |
|-------|----------------|---------|--------|-------|-------|------|
| 1     | 14.37          | 1237712 | 39283  | 49.88 | 1.279 | BB   |
| 2     | 15.68          | 1243819 | 21792  | 50.12 | 2.543 | BB   |

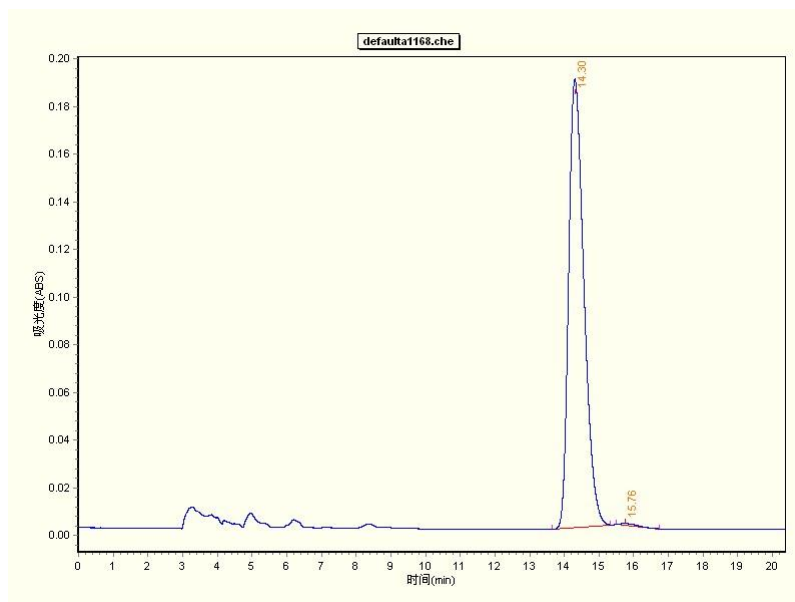

| Entry | Retention time | Area    | Height | Area% | Width | Type |
|-------|----------------|---------|--------|-------|-------|------|
| 1     | 14.30          | 2869484 | 94041  | 99.31 | 1.667 | BB   |
| 2     | 15.76          | 19961   | 553    | 0.69  | 1.278 | BB   |



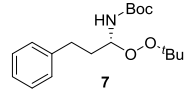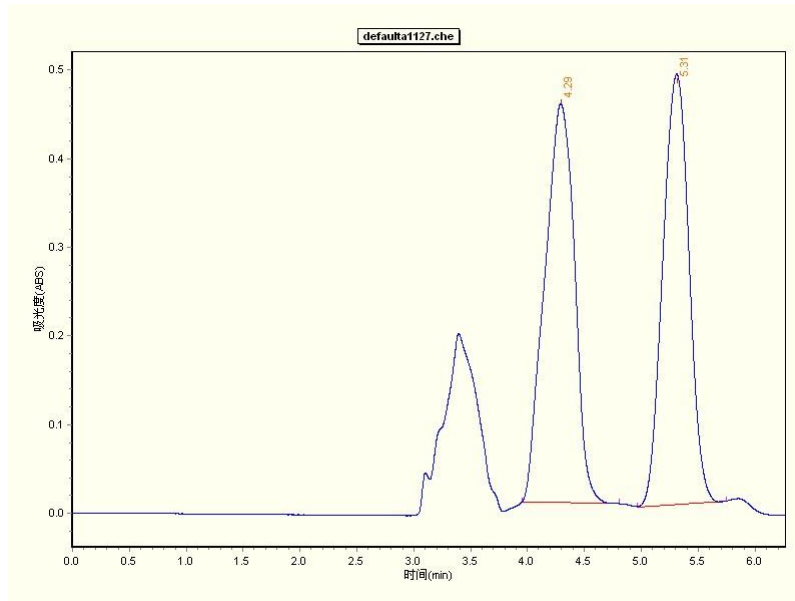

| Entry | Retention time | Area    | Height | Area% | Width | Type |
|-------|----------------|---------|--------|-------|-------|------|
| 1     | 4.29           | 4108205 | 225148 | 51.45 | 0.852 | BB   |
| 2     | 5.31           | 3876196 | 242504 | 48.55 | 0.789 | BB   |

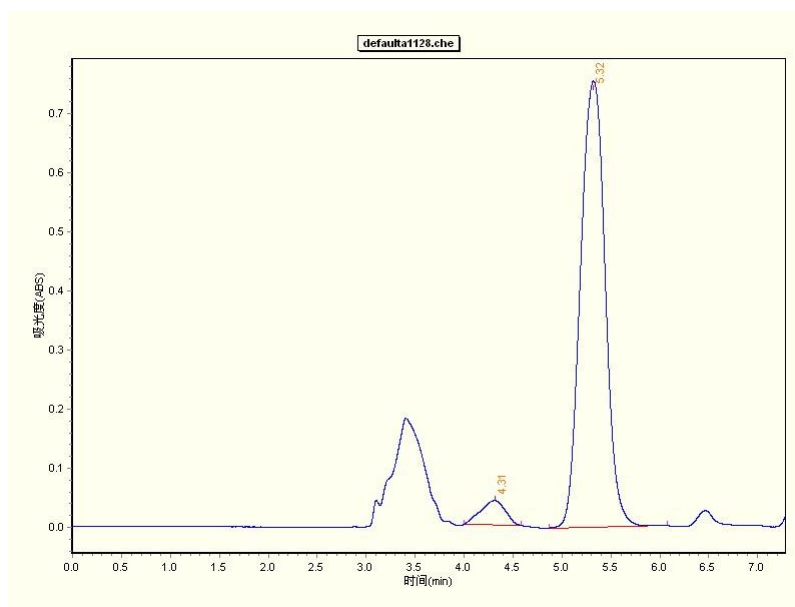

| Entry | Retention time | Area    | Height | Area% | Width | Type |
|-------|----------------|---------|--------|-------|-------|------|
| 1     | 4.31           | 364815  | 20666  | 5.23  | 0.585 | BB   |
| 2     | 5.32           | 6616835 | 377933 | 94.77 | 1.210 | BB   |
